# Supplementary material for: Small extracellular vesicles and their miRNA cargo are anti-apoptotic members of the senescence-associated secretory phenotype
Source: Aging (Albany NY). 2018 May 19;10(5):1103–32. doi: 10.18632/aging.101452 (PMC5990398; doi:10.18632/aging.101452)
Supplement: Supplementary Data List [file aging-10-101452-s002.xlsx]

## Sheet: S1_customized_QPCR_panel
To FIG.3 S1 Customized qPCR panel for discovery study
microRNA Name	Order in 384	Order in 384	Panel plate	Target sequence
	(for sorting by row)	(for sorting by column)	position
hsa-miR-1	1	1	A01	UGGAAUGUAAAGAAGUAUGUAU
hsa-let-7g-3p	2	17	A02	CUGUACAGGCCACUGCCUUGC
hsa-miR-18a-3p	3	33	A03	ACUGCCCUAAGUGCUCCUUCUGG
hsa-miR-24-3p	4	49	A04	UGGCUCAGUUCAGCAGGAACAG
hsa-miR-29c-3p	5	65	A05	UAGCACCAUUUGAAAUCGGUUA
hsa-miR-34b-3p	6	81	A06	CAAUCACUAACUCCACUGCCAU
hsa-miR-106b-5p	7	97	A07	UAAAGUGCUGACAGUGCAGAU
hsa-miR-132-3p	8	113	A08	UAACAGUCUACAGCCAUGGUCG
hsa-miR-143-3p	9	129	A09	UGAGAUGAAGCACUGUAGCUC
hsa-miR-152-3p	10	145	A10	UCAGUGCAUGACAGAACUUGG
hsa-miR-192-5p	11	161	A11	CUGACCUAUGAAUUGACAGCC
hsa-miR-199b-5p	12	177	A12	CCCAGUGUUUAGACUAUCUGUUC
hsa-miR-221-3p	13	193	A13	AGCUACAUUGUCUGCUGGGUUUC
hsa-miR-323a-3p	14	209	A14	CACAUUACACGGUCGACCUCU
hsa-miR-340-3p	15	225	A15	UCCGUCUCAGUUACUUUAUAGC
hsa-miR-376b-3p	16	241	A16	AUCAUAGAGGAAAAUCCAUGUU
hsa-miR-411-5p	17	257	A17	UAGUAGACCGUAUAGCGUACG
hsa-miR-450b-5p	18	273	A18	UUUUGCAAUAUGUUCCUGAAUA
hsa-miR-493-3p	19	289	A19	UGAAGGUCUACUGUGUGCCAGG
hsa-miR-514a-3p	20	305	A20	AUUGACACUUCUGUGAGUAGA
hsa-miR-590-5p	21	321	A21	GAGCUUAUUCAUAAAAGUGCAG
hsa-miR-660-5p	22	337	A22	UACCCAUUGCAUAUCGGAGUUG
hsa-miR-940	23	353	A23	AAGGCAGGGCCCCCGCUCCCC
hsa-miR-95-3p	24	369	A24	UUCAACGGGUAUUUAUUGAGCA
U6 snRNA	25	2	B01
hsa-let-7g-5p	26	18	B02	UGAGGUAGUAGUUUGUACAGUU
hsa-miR-18a-5p	27	34	B03	UAAGGUGCAUCUAGUGCAGAUAG
hsa-miR-25-3p	28	50	B04	CAUUGCACUUGUCUCGGUCUGA
hsa-miR-29c-5p	29	66	B05	UGACCGAUUUCUCCUGGUGUUC
hsa-miR-34b-5p	30	82	B06	UAGGCAGUGUCAUUAGCUGAUUG
hsa-miR-107	31	98	B07	AGCAGCAUUGUACAGGGCUAUCA
hsa-miR-133a-3p	32	114	B08	UUUGGUCCCCUUCAACCAGCUG
hsa-miR-143-5p	33	130	B09	GGUGCAGUGCUGCAUCUCUGGU
hsa-miR-154-3p	34	146	B10	AAUCAUACACGGUUGACCUAUU
hsa-miR-193a-3p	35	162	B11	AACUGGCCUACAAAGUCCCAGU
hsa-miR-200a-3p	36	178	B12	UAACACUGUCUGGUAACGAUGU
hsa-miR-221-5p	37	194	B13	ACCUGGCAUACAAUGUAGAUUU
hsa-miR-324-3p	38	210	B14	ACUGCCCCAGGUGCUGCUGG
hsa-miR-342-3p	39	226	B15	UCUCACACAGAAAUCGCACCCGU
hsa-miR-376c-3p	40	242	B16	AACAUAGAGGAAAUUCCACGU
hsa-miR-412-3p	41	258	B17	ACUUCACCUGGUCCACUAGCCGU
hsa-miR-451a	42	274	B18	AAACCGUUACCAUUACUGAGUU
hsa-miR-493-5p	43	290	B19	UUGUACAUGGUAGGCUUUCAUU
hsa-miR-520h	44	306	B20	ACAAAGUGCUUCCCUUUAGAGU
hsa-miR-595	45	322	B21	GAAGUGUGCCGUGGUGUGUCU
hsa-miR-663a	46	338	B22	AGGCGGGGCGCCGCGGGACCGC
hsa-miR-941	47	354	B23	CACCCGGCUGUGUGCACAUGUGC
hsa-miR-98-5p	48	370	B24	UGAGGUAGUAAGUUGUAUUGUU
hsa-miR-7-5p	49	3	C01	UGGAAGACUAGUGAUUUUGUUGU
hsa-let-7i-3p	50	19	C02	CUGCGCAAGCUACUGCCUUGCU
hsa-miR-18b-5p	51	35	C03	UAAGGUGCAUCUAGUGCAGUUAG
hsa-miR-26a-5p	52	51	C04	UUCAAGUAAUCCAGGAUAGGCU
hsa-miR-30a-3p	53	67	C05	CUUUCAGUCGGAUGUUUGCAGC
hsa-miR-34c-3p	54	83	C06	AAUCACUAACCACACGGCCAGG
hsa-miR-125a-3p	55	99	C07	ACAGGUGAGGUUCUUGGGAGCC
hsa-miR-133b	56	115	C08	UUUGGUCCCCUUCAACCAGCUA
hsa-miR-144-3p	57	131	C09	UACAGUAUAGAUGAUGUACU
hsa-miR-154-5p	58	147	C10	UAGGUUAUCCGUGUUGCCUUCG
hsa-miR-193a-5p	59	163	C11	UGGGUCUUUGCGGGCGAGAUGA
hsa-miR-200b-3p	60	179	C12	UAAUACUGCCUGGUAAUGAUGA
hsa-miR-222-3p	61	195	C13	AGCUACAUCUGGCUACUGGGU
hsa-miR-324-5p	62	211	C14	CGCAUCCCCUAGGGCAUUGGUGU
hsa-miR-346	63	227	C15	UGUCUGCCCGCAUGCCUGCCUCU
hsa-miR-377-3p	64	243	C16	AUCACACAAAGGCAACUUUUGU
hsa-miR-421	65	259	C17	AUCAACAGACAUUAAUUGGGCGC
hsa-miR-452-5p	66	275	C18	AACUGUUUGCAGAGGAAACUGA
hsa-miR-494-3p	67	291	C19	UGAAACAUACACGGGAAACCUC
hsa-miR-532-3p	68	307	C20	CCUCCCACACCCAAGGCUUGCA
hsa-miR-604	69	323	C21	AGGCUGCGGAAUUCAGGAC
hsa-miR-663b	70	339	C22	GGUGGCCCGGCCGUGCCUGAGG
hsa-miR-1185-5p	71	355	C23	AGAGGAUACCCUUUGUAUGUU
hsa-miR-99a-3p	72	371	C24	CAAGCUCGCUUCUAUGGGUCUG
hsa-let-7a-2-3p	73	4	D01	CUGUACAGCCUCCUAGCUUUCC
hsa-let-7i-5p	74	20	D02	UGAGGUAGUAGUUUGUGCUGUU
hsa-miR-19a-3p	75	36	D03	UGUGCAAAUCUAUGCAAAACUGA
hsa-miR-26b-3p	76	52	D04	CCUGUUCUCCAUUACUUGGCUC
hsa-miR-30a-5p	77	68	D05	UGUAAACAUCCUCGACUGGAAG
hsa-miR-34c-5p	78	84	D06	AGGCAGUGUAGUUAGCUGAUUGC
hsa-miR-122-5p	79	100	D07	UGGAGUGUGACAAUGGUGUUUG
hsa-miR-136-3p	80	116	D08	CAUCAUCGUCUCAAAUGAGUCU
hsa-miR-144-5p	81	132	D09	GGAUAUCAUCAUAUACUGUAAG
hsa-miR-181a-2-3p	82	148	D10	ACCACUGACCGUUGACUGUACC
hsa-miR-193b-3p	83	164	D11	AACUGGCCCUCAAAGUCCCGCU
hsa-miR-200c-3p	84	180	D12	UAAUACUGCCGGGUAAUGAUGGA
hsa-miR-222-5p	85	196	D13	CUCAGUAGCCAGUGUAGAUCCU
UniSp2 CP	86	212	D14
hsa-miR-361-3p	87	228	D15	UCCCCCAGGUGUGAUUCUGAUUU
hsa-miR-377-5p	88	244	D16	AGAGGUUGCCCUUGGUGAAUUC
hsa-miR-423-3p	89	260	D17	AGCUCGGUCUGAGGCCCCUCAGU
hsa-miR-454-3p	90	276	D18	UAGUGCAAUAUUGCUUAUAGGGU
hsa-miR-495-3p	91	292	D19	AAACAAACAUGGUGCACUUCUU
hsa-miR-532-5p	92	308	D20	CAUGCCUUGAGUGUAGGACCGU
hsa-miR-615-3p	93	324	D21	UCCGAGCCUGGGUCUCCCUCUU
hsa-miR-664a-3p	94	340	D22	UAUUCAUUUAUCCCCAGCCUACA
hsa-miR-1207-5p	95	356	D23	UGGCAGGGAGGCUGGGAGGGG
hsa-miR-99a-5p	96	372	D24	AACCCGUAGAUCCGAUCUUGUG
hsa-let-7a-3p	97	5	E01	CUAUACAAUCUACUGUCUUUC
hsa-miR-9-3p	98	21	E02	AUAAAGCUAGAUAACCGAAAGU
hsa-miR-19b-3p	99	37	E03	UGUGCAAAUCCAUGCAAAACUGA
hsa-miR-26b-5p	100	53	E04	UUCAAGUAAUUCAGGAUAGGU
hsa-miR-30b-5p	101	69	E05	UGUAAACAUCCUACACUCAGCU
hsa-miR-92a-3p	102	85	E06	UAUUGCACUUGUCCCGGCCUGU
hsa-miR-125a-5p	103	101	E07	UCCCUGAGACCCUUUAACCUGUGA
hsa-miR-134-5p	104	117	E08	UGUGACUGGUUGACCAGAGGGG
hsa-miR-145-3p	105	133	E09	GGAUUCCUGGAAAUACUGUUCU
hsa-miR-181a-3p	106	149	E10	ACCAUCGACCGUUGAUUGUACC
hsa-miR-193b-5p	107	165	E11	CGGGGUUUUGAGGGCGAGAUGA
hsa-miR-200b-5p	108	181	E12	CAUCUUACUGGGCAGCAUUGGA
hsa-miR-223-3p	109	197	E13	UGUCAGUUUGUCAAAUACCCCA
hsa-miR-328-3p	110	213	E14	CUGGCCCUCUCUGCCCUUCCGU
hsa-miR-361-5p	111	229	E15	UUAUCAGAAUCUCCAGGGGUAC
hsa-miR-378a-3p	112	245	E16	ACUGGACUUGGAGUCAGAAGGC
hsa-miR-423-5p	113	261	E17	UGAGGGGCAGAGAGCGAGACUUU
hsa-miR-455-3p	114	277	E18	GCAGUCCAUGGGCAUAUACAC
hsa-miR-496	115	293	E19	UGAGUAUUACAUGGCCAAUCUC
hsa-miR-539-5p	116	309	E20	GGAGAAAUUAUCCUUGGUGUGU
hsa-miR-625-3p	117	325	E21	GACUAUAGAACUUUCCCCCUCA
hsa-miR-665	118	341	E22	ACCAGGAGGCUGAGGCCCCU
hsa-miR-1247-5p	119	357	E23	ACCCGUCCCGUUCGUCCCCGGA
hsa-miR-99b-3p	120	373	E24	CAAGCUCGUGUCUGUGGGUCCG
hsa-let-7a-5p	121	6	F01	UGAGGUAGUAGGUUGUAUAGUU
hsa-miR-10a-3p	122	22	F02	CAAAUUCGUAUCUAGGGGAAUA
hsa-miR-20a-3p	123	38	F03	ACUGCAUUAUGAGCACUUAAAG
hsa-miR-27a-3p	124	54	F04	UUCACAGUGGCUAAGUUCCGC
hsa-miR-30c-2-3p	125	70	F05	CUGGGAGAAGGCUGUUUACUCU
hsa-miR-92b-3p	126	86	F06	UAUUGCACUCGUCCCGGCCUCC
hsa-miR-125b-1-3p	127	102	F07	ACGGGUUAGGCUCUUGGGAGCU
hsa-miR-136-5p	128	118	F08	ACUCCAUUUGUUUUGAUGAUGGA
hsa-miR-145-5p	129	134	F09	GUCCAGUUUUCCCAGGAAUCCCU
hsa-miR-181a-5p	130	150	F10	AACAUUCAACGCUGUCGGUGAGU
hsa-miR-194-3p	131	166	F11	CCAGUGGGGCUGCUGUUAUCUG
hsa-miR-203a	132	182	F12	GUGAAAUGUUUAGGACCACUAG
hsa-miR-224-3p	133	198	F13	AAAAUGGUGCCCUAGUGACUACA
hsa-miR-329-3p	134	214	F14	AACACACCUGGUUAACCUCUUU
hsa-miR-362-3p	135	230	F15	AACACACCUAUUCAAGGAUUCA
hsa-miR-378a-5p	136	246	F16	CUCCUGACUCCAGGUCCUGUGU
hsa-miR-424-3p	137	262	F17	CAAAACGUGAGGCGCUGCUAU
hsa-miR-455-5p	138	278	F18	UAUGUGCCUUUGGACUACAUCG
hsa-miR-497-5p	139	294	F19	CAGCAGCACACUGUGGUUUGU
hsa-miR-542-5p	140	310	F20	UCGGGGAUCAUCAUGUCACGAGA
hsa-miR-628-3p	141	326	F21	UCUAGUAAGAGUGGCAGUCGA
hsa-miR-671-5p	142	342	F22	AGGAAGCCCUGGAGGGGCUGGAG
hsa-miR-1249	143	358	F23	ACGCCCUUCCCCCCCUUCUUCA
hsa-miR-99b-5p	144	374	F24	CACCCGUAGAACCGACCUUGCG
hsa-let-7b-3p	145	7	G01	CUAUACAACCUACUGCCUUCCC
hsa-miR-10a-5p	146	23	G02	UACCCUGUAGAUCCGAAUUUGUG
hsa-miR-20a-5p	147	39	G03	UAAAGUGCUUAUAGUGCAGGUAG
hsa-miR-27a-5p	148	55	G04	AGGGCUUAGCUGCUUGUGAGCA
hsa-miR-30c-5p	149	71	G05	UGUAAACAUCCUACACUCUCAGC
hsa-miR-93-3p	150	87	G06	ACUGCUGAGCUAGCACUUCCCG
hsa-miR-125b-5p	151	103	G07	UCCCUGAGACCCUAACUUGUGA
hsa-miR-137	152	119	G08	UUAUUGCUUAAGAAUACGCGUAG
hsa-miR-146a-5p	153	135	G09	UGAGAACUGAAUUCCAUGGGUU
hsa-miR-181b-5p	154	151	G10	AACAUUCAUUGCUGUCGGUGGGU
hsa-miR-195-5p	155	167	G11	UAGCAGCACAGAAAUAUUGGC
hsa-miR-204-5p	156	183	G12	UUCCCUUUGUCAUCCUAUGCCU
hsa-miR-224-5p	157	199	G13	CAAGUCACUAGUGGUUCCGUU
hsa-miR-330-3p	158	215	G14	GCAAAGCACACGGCCUGCAGAGA
hsa-miR-362-5p	159	231	G15	AAUCCUUGGAACCUAGGUGUGAGU
hsa-miR-379-3p	160	247	G16	UAUGUAACAUGGUCCACUAACU
hsa-miR-424-5p	161	263	G17	CAGCAGCAAUUCAUGUUUUGAA
hsa-miR-483-3p	162	279	G18	UCACUCCUCUCCUCCCGUCUU
hsa-miR-499a-5p	163	295	G19	UUAAGACUUGCAGUGAUGUUU
hsa-miR-543	164	311	G20	AAACAUUCGCGGUGCACUUCUU
hsa-miR-629-5p	165	327	G21	UGGGUUUACGUUGGGAGAACU
hsa-miR-675-3p	166	343	G22	CUGUAUGCCCUCACCGCUCA
hsa-miR-1256	167	359	G23	AGGCAUUGACUUCUCACUAGCU
hsa-miR-155-5p	168	375	G24	UUAAUGCUAAUCGUGAUAGGGGU
hsa-let-7b-5p	169	8	H01	UGAGGUAGUAGGUUGUGUGGUU
hsa-miR-10b-5p	170	24	H02	UACCCUGUAGAACCGAAUUUGUG
hsa-miR-21-3p	171	40	H03	CAACACCAGUCGAUGGGCUGU
hsa-miR-27b-3p	172	56	H04	UUCACAGUGGCUAAGUUCUGC
hsa-miR-30d-3p	173	72	H05	CUUUCAGUCAGAUGUUUGCUGC
hsa-miR-93-5p	174	88	H06	CAAAGUGCUGUUCGUGCAGGUAG
hsa-miR-126-3p	175	104	H07	UCGUACCGUGAGUAAUAAUGCG
hsa-miR-138-1-3p	176	120	H08	GCUACUUCACAACACCAGGGCC
hsa-miR-146b-5p	177	136	H09	UGAGAACUGAAUUCCAUAGGCU
hsa-miR-181c-3p	178	152	H10	AACCAUCGACCGUUGAGUGGAC
Cel-miR-39-3p CP	179	168	H11
hsa-miR-205-5p	180	184	H12	UCCUUCAUUCCACCGGAGUCUG
hsa-miR-296-3p	181	200	H13	GAGGGUUGGGUGGAGGCUCUCC
hsa-miR-331-3p	182	216	H14	GCCCCUGGGCCUAUCCUAGAA
hsa-miR-365a-3p	183	232	H15	UAAUGCCCCUAAAAAUCCUUAU
hsa-miR-379-5p	184	248	H16	UGGUAGACUAUGGAACGUAGG
hsa-miR-425-3p	185	264	H17	AUCGGGAAUGUCGUGUCCGCCC
hsa-miR-483-5p	186	280	H18	AAGACGGGAGGAAAGAAGGGAG
hsa-miR-500a-5p	187	296	H19	UAAUCCUUGCUACCUGGGUGAGA
hsa-miR-548c-5p	188	312	H20	AAAAGUAAUUGCGGUUUUUGCC
hsa-miR-632	189	328	H21	GUGUCUGCUUCCUGUGGGA
hsa-miR-708-3p	190	344	H22	CAACUAGACUGUGAGCUUCUAG
hsa-miR-1260a	191	360	H23	AUCCCACCUCUGCCACCA
hsa-miR-487a-3p	192	376	H24	AAUCAUACAGGGACAUCCAGUU
hsa-let-7c-5p	193	9	I01	UGAGGUAGUAGGUUGUAUGGUU
hsa-miR-15a-3p	194	25	I02	CAGGCCAUAUUGUGCUGCCUCA
hsa-miR-21-5p	195	41	I03	UAGCUUAUCAGACUGAUGUUGA
hsa-miR-27b-5p	196	57	I04	AGAGCUUAGCUGAUUGGUGAAC
hsa-miR-30d-5p	197	73	I05	UGUAAACAUCCCCGACUGGAAG
hsa-miR-100-5p	198	89	I06	AACCCGUAGAUCCGAACUUGUG
hsa-miR-126-5p	199	105	I07	CAUUAUUACUUUUGGUACGCG
hsa-miR-138-5p	200	121	I08	AGCUGGUGUUGUGAAUCAGGCCG
hsa-miR-148a-3p	201	137	I09	UCAGUGCACUACAGAACUUUGU
hsa-miR-181c-5p	202	153	I10	AACAUUCAACCUGUCGGUGAGU
hsa-miR-194-5p	203	169	I11	UGUAACAGCAACUCCAUGUGGA
hsa-miR-206	204	185	I12	UGGAAUGUAAGGAAGUGUGUGG
hsa-miR-296-5p	205	201	I13	AGGGCCCCCCCUCAAUCCUGU
hsa-miR-331-5p	206	217	I14	CUAGGUAUGGUCCCAGGGAUCC
hsa-miR-365b-5p	207	233	I15	AGGGACUUUCAGGGGCAGCUGU
hsa-miR-381-3p	208	249	I16	UAUACAAGGGCAAGCUCUCUGU
hsa-miR-425-5p	209	265	I17	AAUGACACGAUCACUCCCGUUGA
hsa-miR-484	210	281	I18	UCAGGCUCAGUCCCCUCCCGAU
hsa-miR-501-3p	211	297	I19	AAUGCACCCGGGCAAGGAUUCU
hsa-miR-548k	212	313	I20	AAAAGUACUUGCGGAUUUUGCU
hsa-miR-638	213	329	I21	AGGGAUCGCGGGCGGGUGGCGGCCU
hsa-miR-708-5p	214	345	I22	AAGGAGCUUACAAUCUAGCUGGG
hsa-miR-1271-5p	215	361	I23	CUUGGCACCUAGCAAGCACUCA
	216	377	I24
hsa-let-7d-3p	217	10	J01	CUAUACGACCUGCUGCCUUUCU
hsa-miR-15a-5p	218	26	J02	UAGCAGCACAUAAUGGUUUGUG
hsa-miR-22-3p	219	42	J03	AAGCUGCCAGUUGAAGAACUGU
hsa-miR-28-3p	220	58	J04	CACUAGAUUGUGAGCUCCUGGA
hsa-miR-30e-3p	221	74	J05	CUUUCAGUCGGAUGUUUACAGC
hsa-miR-101-3p	222	90	J06	UACAGUACUGUGAUAACUGAA
hsa-miR-127-3p	223	106	J07	UCGGAUCCGUCUGAGCUUGGCU
hsa-miR-139-3p	224	122	J08	UGGAGACGCGGCCCUGUUGGAGU
hsa-miR-147b	225	138	J09	GUGUGCGGAAAUGCUUCUGCUA
hsa-miR-185-5p	226	154	J10	UGGAGAGAAAGGCAGUUCCUGA
hsa-miR-196a-5p	227	170	J11	UAGGUAGUUUCAUGUUGUUGGG
hsa-miR-212-3p	228	186	J12	UAACAGUCUCCAGUCACGGCC
hsa-miR-299-5p	229	202	J13	UGGUUUACCGUCCCACAUACAU
hsa-miR-335-3p	230	218	J14	UUUUUCAUUAUUGCUCCUGACC
hsa-miR-369-3p	231	234	J15	AAUAAUACAUGGUUGAUCUUU
hsa-miR-382-3p	232	250	J16	AAUCAUUCACGGACAACACUU
hsa-miR-431-3p	233	266	J17	CAGGUCGUCUUGCAGGGCUUCU
hsa-miR-485-3p	234	282	J18	GUCAUACACGGCUCUCCUCUCU
hsa-miR-502-3p	235	298	J19	AAUGCACCUGGGCAAGGAUUCA
hsa-miR-550a-3p	236	314	J20	UGUCUUACUCCCUCAGGCACAU
hsa-miR-642a-5p	237	330	J21	GUCCCUCUCCAAAUGUGUCUUG
hsa-miR-744-5p	238	346	J22	UGCGGGGCUAGGGCUAACAGCA
hsa-miR-1296-5p	239	362	J23	UUAGGGCCCUGGCUCCAUCUCC
hsa-miR-382-5p	240	378	J24	GAAGUUGUUCGUGGUGGAUUCG
hsa-let-7d-5p	241	11	K01	AGAGGUAGUAGGUUGCAUAGUU
hsa-miR-15b-3p	242	27	K02	CGAAUCAUUAUUUGCUGCUCUA
hsa-miR-22-5p	243	43	K03	AGUUCUUCAGUGGCAAGCUUUA
hsa-miR-28-5p	244	59	K04	AAGGAGCUCACAGUCUAUUGAG
hsa-miR-30e-5p	245	75	K05	UGUAAACAUCCUUGACUGGAAG
hsa-miR-101-5p	246	91	K06	CAGUUAUCACAGUGCUGAUGCU
hsa-miR-127-5p	247	107	K07	CUGAAGCUCAGAGGGCUCUGAU
hsa-miR-139-5p	248	123	K08	UCUACAGUGCACGUGUCUCCAGU
hsa-miR-148b-3p	249	139	K09	UCAGUGCAUCACAGAACUUUGU
hsa-miR-326	250	155	K10	CCUCUGGGCCCUUCCUCCAG
hsa-miR-196b-3p	251	171	K11	UCGACAGCACGACACUGCCUUC
hsa-miR-214-3p	252	187	K12	ACAGCAGGCACAGACAGGCAGU
hsa-miR-301a-3p	253	203	K13	CAGUGCAAUAGUAUUGUCAAAGC
hsa-miR-335-5p	254	219	K14	UCAAGAGCAAUAACGAAAAAUGU
hsa-miR-370-3p	255	235	K15	GCCUGCUGGGGUGGAACCUGGU
UniSp3 IPC	256	251	K16
hsa-miR-431-5p	257	267	K17	UGUCUUGCAGGCCGUCAUGCA
hsa-miR-486-5p	258	283	K18	UCCUGUACUGAGCUGCCCCGAG
hsa-miR-502-5p	259	299	K19	AUCCUUGCUAUCUGGGUGCUA
hsa-miR-551a	260	315	K20	GCGACCCACUCUUGGUUUCCA
hsa-miR-643	261	331	K21	ACUUGUAUGCUAGCUCAGGUAG
hsa-miR-758-3p	262	347	K22	UUUGUGACCUGGUCCACUAACC
hsa-miR-1468-5p	263	363	K23	CUCCGUUUGCCUGUUUCGCUG
hsa-miR-585-3p	264	379	K24	UGGGCGUAUCUGUAUGCUA
hsa-let-7e-3p	265	12	L01	CUAUACGGCCUCCUAGCUUUCC
hsa-miR-15b-5p	266	28	L02	UAGCAGCACAUCAUGGUUUACA
hsa-miR-23a-3p	267	44	L03	AUCACAUUGCCAGGGAUUUCC
hsa-miR-29a-3p	268	60	L04	UAGCACCAUCUGAAAUCGGUUA
hsa-miR-31-3p	269	76	L05	UGCUAUGCCAACAUAUUGCCAU
hsa-miR-103a-3p	270	92	L06	AGCAGCAUUGUACAGGGCUAUGA
hsa-miR-128-3p	271	108	L07	UCACAGUGAACCGGUCUCUUU
hsa-miR-140-3p	272	124	L08	UACCACAGGGUAGAACCACGG
hsa-miR-148b-5p	273	140	L09	AAGUUCUGUUAUACACUCAGGC
hsa-miR-186-5p	274	156	L10	CAAAGAAUUCUCCUUUUGGGCU
hsa-miR-197-3p	275	172	L11	UUCACCACCUUCUCCACCCAGC
hsa-miR-214-5p	276	188	L12	UGCCUGUCUACACUUGCUGUGC
hsa-miR-301b	277	204	L13	CAGUGCAAUGAUAUUGUCAAAGC
hsa-miR-337-3p	278	220	L14	CUCCUAUAUGAUGCCUUUCUUC
hsa-miR-373-5p	279	236	L15	ACUCAAAAUGGGGGCGCUUUCC
hsa-miR-383-5p	280	252	L16	AGAUCAGAAGGUGAUUGUGGCU
hsa-miR-432-3p	281	268	L17	CUGGAUGGCUCCUCCAUGUCU
hsa-miR-487b-3p	282	284	L18	AAUCGUACAGGGUCAUCCACUU
hsa-miR-503-5p	283	300	L19	UAGCAGCGGGAACAGUUCUGCAG
hsa-miR-570-3p	284	316	L20	CGAAAACAGCAAUUACCUUUGC
hsa-miR-649	285	332	L21	AAACCUGUGUUGUUCAAGAGUC
hsa-miR-766-3p	286	348	L22	ACUCCAGCCCCACAGCCUCAGC
hsa-miR-1913	287	364	L23	UCUGCCCCCUCCGCUGCUGCCA
UniSp3 IPC	288	380	L24
hsa-let-7e-5p	289	13	M01	UGAGGUAGGAGGUUGUAUAGUU
hsa-miR-16-1-3p	290	29	M02	CCAGUAUUAACUGUGCUGCUGA
hsa-miR-23a-5p	291	45	M03	GGGGUUCCUGGGGAUGGGAUUU
hsa-miR-29a-5p	292	61	M04	ACUGAUUUCUUUUGGUGUUCAG
hsa-miR-31-5p	293	77	M05	AGGCAAGAUGCUGGCAUAGCU
hsa-miR-106a-5p	294	93	M06	AAAAGUGCUUACAGUGCAGGUAG
hsa-miR-129-2-3p	295	109	M07	AAGCCCUUACCCCAAAAAGCAU
hsa-miR-140-5p	296	125	M08	CAGUGGUUUUACCCUAUGGUAG
UniSp6 CP	297	141	M09
hsa-miR-188-3p	298	157	M10	CUCCCACAUGCAGGGUUUGCA
hsa-miR-196b-5p	299	173	M11	UAGGUAGUUUCCUGUUGUUGGG
hsa-miR-215-5p	300	189	M12	AUGACCUAUGAAUUGACAGAC
hsa-miR-320a	301	205	M13	AAAAGCUGGGUUGAGAGGGCGA
hsa-miR-337-5p	302	221	M14	GAACGGCUUCAUACAGGAGUU
hsa-miR-374a-5p	303	237	M15	UUAUAAUACAACCUGAUAAGUG
hsa-miR-409-3p	304	253	M16	GAAUGUUGCUCGGUGAACCCCU
hsa-miR-432-5p	305	269	M17	UCUUGGAGUAGGUCAUUGGGUGG
hsa-miR-489-3p	306	285	M18	GUGACAUCACAUAUACGGCAGC
hsa-miR-504-5p	307	301	M19	AGACCCUGGUCUGCACUCUAUC
hsa-miR-572	308	317	M20	GUCCGCUCGGCGGUGGCCCA
hsa-miR-652-3p	309	333	M21	AAUGGCGCCACUAGGGUUGUG
hsa-miR-769-5p	310	349	M22	UGAGACCUCUGGGUUCUGAGCU
hsa-miR-1972	311	365	M23	UCAGGCCAGGCACAGUGGCUCA
hsa-miR-369-5p	312	381	M24	AGAUCGACCGUGUUAUAUUCGC
hsa-let-7f-1-3p	313	14	N01	CUAUACAAUCUAUUGCCUUCCC
hsa-miR-16-5p	314	30	N02	UAGCAGCACGUAAAUAUUGGCG
hsa-miR-23b-3p	315	46	N03	AUCACAUUGCCAGGGAUUACC
UniSp5 CP	316	62	N04
hsa-miR-32-5p	317	78	N05	UAUUGCACAUUACUAAGUUGCA
UniSp4 CP	318	94	N06
hsa-miR-130a-3p	319	110	N07	CAGUGCAAUGUUAAAAGGGCAU
hsa-miR-141-3p	320	126	N08	UAACACUGUCUGGUAAAGAUGG
hsa-miR-150-5p	321	142	N09	UCUCCCAACCCUUGUACCAGUG
hsa-miR-188-5p	322	158	N10	CAUCCCUUGCAUGGUGGAGGG
hsa-miR-210-3p	323	174	N11	CUGUGCGUGUGACAGCGGCUGA
hsa-miR-218-5p	324	190	N12	UUGUGCUUGAUCUAACCAUGU
hsa-miR-320b	325	206	N13	AAAAGCUGGGUUGAGAGGGCAA
hsa-miR-338-3p	326	222	N14	UCCAGCAUCAGUGAUUUUGUUG
hsa-miR-374b-5p	327	238	N15	AUAUAAUACAACCUGCUAAGUG
hsa-miR-409-5p	328	254	N16	AGGUUACCCGAGCAACUUUGCAU
hsa-miR-433-3p	329	270	N17	AUCAUGAUGGGCUCCUCGGUGU
hsa-miR-490-3p	330	286	N18	CAACCUGGAGGACUCCAUGCUG
hsa-miR-505-3p	331	302	N19	CGUCAACACUUGCUGGUUUCCU
hsa-miR-574-3p	332	318	N20	CACGCUCAUGCACACACCCACA
hsa-miR-654-3p	333	334	N21	UAUGUCUGCUGACCAUCACCUU
hsa-miR-874-3p	334	350	N22	CUGCCCUGGCCCGAGGGACCGA
hsa-miR-2110	335	366	N23	UUGGGGAAACGGCCGCUGAGUG
hsa-miR-450a-5p	336	382	N24	UUUUGCGAUGUGUUCCUAAUAU
hsa-let-7f-2-3p	337	15	O01	CUAUACAGUCUACUGUCUUUCC
hsa-miR-17-3p	338	31	O02	ACUGCAGUGAAGGCACUUGUAG
hsa-miR-24-1-5p	339	47	O03	UGCCUACUGAGCUGAUAUCAGU
hsa-miR-29b-2-5p	340	63	O04	CUGGUUUCACAUGGUGGCUUAG
hsa-miR-34a-3p	341	79	O05	CAAUCAGCAAGUAUACUGCCCU
hsa-miR-106b-3p	342	95	O06	CCGCACUGUGGGUACUUGCUGC
hsa-miR-130b-3p	343	111	O07	CAGUGCAAUGAUGAAAGGGCAU
hsa-miR-142-3p	344	127	O08	UGUAGUGUUUCCUACUUUAUGGA
hsa-miR-151a-3p	345	143	O09	CUAGACUGAAGCUCCUUGAGG
hsa-miR-191-3p	346	159	O10	GCUGCGCUUGGAUUUCGUCCCC
hsa-miR-199a-3p	347	175	O11	ACAGUAGUCUGCACAUUGGUUA
hsa-miR-219a-1-3p	348	191	O12	AGAGUUGAGUCUGGACGUCCCG
hsa-miR-320c	349	207	O13	AAAAGCUGGGUUGAGAGGGU
hsa-miR-339-3p	350	223	O14	UGAGCGCCUCGACGACAGAGCCG
hsa-miR-376a-3p	351	239	O15	AUCAUAGAGGAAAAUCCACGU
hsa-miR-410-3p	352	255	O16	AAUAUAACACAGAUGGCCUGU
hsa-miR-449a	353	271	O17	UGGCAGUGUAUUGUUAGCUGGU
hsa-miR-490-5p	354	287	O18	CCAUGGAUCUCCAGGUGGGU
hsa-miR-505-5p	355	303	O19	GGGAGCCAGGAAGUAUUGAUGU
hsa-miR-582-5p	356	319	O20	UUACAGUUGUUCAACCAGUUACU
hsa-miR-654-5p	357	335	O21	UGGUGGGCCGCAGAACAUGUGC
hsa-miR-885-5p	358	351	O22	UCCAUUACACUACCCUGCCUCU
hsa-miR-33a-5p	359	367	O23	GUGCAUUGUAGUUGCAUUGCA
hsa-miR-582-3p	360	383	O24	UAACUGGUUGAACAACUGAACC
hsa-let-7f-5p	361	16	P01	UGAGGUAGUAGAUUGUAUAGUU
hsa-miR-17-5p	362	32	P02	CAAAGUGCUUACAGUGCAGGUAG
hsa-miR-24-2-5p	363	48	P03	UGCCUACUGAGCUGAAACACAG
hsa-miR-29b-3p	364	64	P04	UAGCACCAUUUGAAAUCAGUGUU
hsa-miR-34a-5p	365	80	P05	UGGCAGUGUCUUAGCUGGUUGU
hsa-miR-149-5p	366	96	P06	UCUGGCUCCGUGUCUUCACUCCC
hsa-miR-130b-5p	367	112	P07	ACUCUUUCCCUGUUGCACUAC
hsa-miR-142-5p	368	128	P08	CAUAAAGUAGAAAGCACUACU
hsa-miR-151a-5p	369	144	P09	UCGAGGAGCUCACAGUCUAGU
hsa-miR-191-5p	370	160	P10	CAACGGAAUCCCAAAAGCAGCUG
hsa-miR-199a-5p	371	176	P11	CCCAGUGUUCAGACUACCUGUUC
hsa-miR-219a-5p	372	192	P12	UGAUUGUCCAAACGCAAUUCU
hsa-miR-320d	373	208	P13	AAAAGCUGGGUUGAGAGGA
hsa-miR-339-5p	374	224	P14	UCCCUGUCCUCCAGGAGCUCACG
hsa-miR-376a-5p	375	240	P15	GUAGAUUCUCCUUCUAUGAGUA
hsa-miR-411-3p	376	256	P16	UAUGUAACACGGUCCACUAACC
hsa-miR-450b-3p	377	272	P17	UUGGGAUCAUUUUGCAUCCAUA
hsa-miR-491-5p	378	288	P18	AGUGGGGAACCCUUCCAUGAGG
hsa-miR-509-3-5p	379	304	P19	UACUGCAGACGUGGCAAUCAUG
hsa-miR-590-3p	380	320	P20	UAAUUUUAUGUAUAAGCUAGU
hsa-miR-655-3p	381	336	P21	AUAAUACAUGGUUAACCUCUUU
hsa-miR-889-3p	382	352	P22	UUAAUAUCGGACAACCAUUGU
hsa-miR-7-1-3p	383	368	P23	CAACAAAUCACAGUCUGCCAUA
hsa-miR-877-5p	384	384	P24	GUAGAGGAGAUGGCGCAGGG

## Sheet: S2_Secreted_per_cell
To FIG.3 Significantly differentially secrete miRNAs from SIPS cells at two timepoints D7 and D21
	miRNA	log2FC D7	AveExpr	p-value	adj. p-value		miRNA	log2FC D21	AveExpr	p-value	adj. p-value
	hsa-miR-196b-3p	7.57589	35.3239	2.25168e-08	2.64947e-06		hsa-miR-23a-5p	7.04445	35.9347	0.00404922	0.00576361
	hsa-miR-200c-3p	7.4822	31.901	6.12992e-08	5.40965e-06		hsa-miR-138-1-3p	6.55389	34.7384	0.00310391	0.00464271
	hsa-miR-378a-5p	7.20116	32.6093	7.3629e-07	4.33184e-05		hsa-miR-450b-5p	5.97889	34.3509	0.012894	0.0159146
	hsa-miR-181a-3p	7.03482	32.976	1.26683e-06	6.38843e-05		hsa-miR-1	5.85913	35.0748	0.000125301	0.00125281
	hsa-miR-582-5p	6.95116	33.5326	1.75604e-06	7.74855e-05		hsa-miR-212-3p	5.7258	34.2482	0.0113744	0.0142718
	hsa-miR-582-3p	6.90116	32.4576	2.00479e-06	7.86325e-05		hsa-miR-490-3p	5.43332	33.3071	0.00757003	0.00978836
	hsa-miR-129-2-3p	6.69116	32.476	5.26675e-06	0.000185916		hsa-miR-483-5p	5.16913	36.0598	0.000872065	0.00169142
	hsa-miR-26b-3p	6.45116	34.5351	6.34037e-06	0.000203468		hsa-miR-370-3p	4.94913	33.0798	0.0100014	0.0127455
	hsa-miR-377-5p	6.34116	34.4326	1.08722e-05	0.000319824		hsa-miR-1256	4.93913	36.7548	0.000734519	0.00155935
	hsa-miR-212-3p	6.24116	36.411	1.40919e-05	0.000382649		hsa-miR-34c-3p	4.9058	35.0115	0.00250942	0.00388521
	hsa-miR-191-3p	6.10116	35.4676	1.61343e-05	0.000406816		hsa-miR-129-2-3p	4.90389	35.5284	0.00765292	0.00985942
	hsa-miR-149-5p	5.98553	33.236	1.87071e-05	0.000440239		hsa-miR-432-3p	4.86445	36.1447	0.00985714	0.0126071
	hsa-miR-550a-3p	5.82116	34.6001	2.05832e-05	0.000454116		hsa-miR-708-5p	4.84913	31.2732	0.000136815	0.00125281
	hsa-miR-361-3p	5.73799	33.9276	3.05497e-05	0.000631316		hsa-miR-29c-5p	4.75147	35.1024	0.00448631	0.00625955
	hsa-miR-642a-5p	5.56089	32.1576	3.21918e-05	0.000631316		hsa-miR-487a-3p	4.74246	33.5565	0.000254234	0.00125281
	hsa-miR-339-3p	5.4822	35.2514	3.64474e-05	0.000655735		hsa-miR-632	4.69389	35.5834	0.00114317	0.00210177
	hsa-miR-532-3p	5.4622	34.8593	3.71521e-05	0.000655735		hsa-miR-551a	4.55246	37.3582	0.000623275	0.00145706
	hsa-miR-369-5p	5.3422	29.8293	4.80894e-05	0.00080836		hsa-miR-502-3p	4.54389	33.6484	0.0013301	0.00232438
	hsa-miR-431-3p	5.31116	33.816	5.1927e-05	0.000822923		hsa-miR-27b-5p	4.54332	35.6121	0.0115914	0.0144512
	hsa-miR-335-3p	5.26887	34.9951	5.36182e-05	0.000822923		hsa-miR-200a-3p	4.47332	34.9171	0.0120251	0.0148943
	hsa-miR-542-5p	5.23887	35.1251	9.44294e-05	0.0013889		hsa-miR-138-5p	4.47246	29.5882	0.000635751	0.00147185
	hsa-let-7a-3p	5.12116	35.3126	0.000133878	0.00189035		hsa-miR-206	4.45889	37.7109	0.00342178	0.00499127
	hsa-miR-632	5.06089	35.2401	0.000153653	0.00208614		hsa-miR-550a-3p	4.38389	36.0734	0.0112876	0.0142305
	hsa-miR-30a-3p	5.01553	35.0364	0.000168396	0.00220162		hsa-miR-29b-3p	4.37913	29.0682	9.65161e-05	0.00125281
	hsa-miR-203a	4.99062	30.6543	0.000176661	0.00222719		hsa-miR-570-3p	4.33445	33.8197	0.0129547	0.0159339
	hsa-miR-200b-5p	4.97062	36.076	0.000183109	0.00222888		hsa-miR-34b-5p	4.29389	32.7884	0.00179048	0.00298133
	hsa-miR-1185-5p	4.94799	30.061	0.000194352	0.00228688		hsa-miR-485-3p	4.23913	30.5048	0.000567003	0.00142714
	hsa-miR-10a-3p	4.88589	35.6601	0.00021674	0.00246804		hsa-miR-889-3p	4.20913	34.3198	7.58349e-05	0.00125281
	hsa-miR-24-1-5p	4.8422	33.3101	0.000233903	0.00258024		hsa-miR-663a	4.19246	33.7382	8.22382e-05	0.00125281
	hsa-miR-23a-5p	4.77887	35.3651	0.000257014	0.00274927		hsa-miR-141-3p	4.16913	33.5098	0.00308257	0.00463041
	hsa-miR-638	4.74553	36.6689	0.000279494	0.00284232		hsa-miR-940	4.16913	32.2765	0.00708396	0.00922744
	hsa-let-7a-2-3p	4.71089	35.3901	0.00028434	0.00284232		hsa-miR-191-3p	4.12332	37.9021	0.01457	0.0177966
	hsa-miR-370-3p	4.70887	32.5676	0.000289868	0.00284232		hsa-miR-671-5p	4.11913	33.0915	0.00385273	0.00552851
	hsa-miR-154-3p	4.67089	34.8593	0.000352745	0.00336538		hsa-miR-323a-3p	4.0658	32.0348	0.000307733	0.00125281
	hsa-miR-758-3p	4.58553	35.4951	0.000431734	0.00385208		hsa-miR-496	4.05913	33.4815	0.00458583	0.00637322
	hsa-miR-425-3p	4.5722	31.2026	0.000453175	0.00385208		hsa-miR-29a-3p	4.0458	25.5648	0.000376165	0.00125281
	hsa-miR-181c-5p	4.53553	34.0464	0.000456939	0.00385208		hsa-miR-142-5p	4.01332	28.7171	0.0155237	0.0188312
	hsa-miR-205-5p	4.47116	27.0776	0.000458321	0.00385208		hsa-miR-134-5p	4.01246	30.0782	0.000122531	0.00125281
	hsa-miR-138-5p	4.46887	26.0643	0.000458321	0.00385208		hsa-miR-642a-5p	3.99332	35.7971	0.0157063	0.0189875
	hsa-miR-769-5p	4.44887	33.036	0.000507167	0.0040233		hsa-miR-137	3.98246	30.3198	0.000189778	0.00125281
	hsa-miR-93-3p	4.22589	34.2964	0.000510192	0.0040233		hsa-miR-194-3p	3.97889	37.4509	0.00496166	0.00684167
	hsa-miR-125b-1-3p	4.19553	31.5643	0.000512885	0.0040233		hsa-miR-200b-3p	3.94961	32.3477	0.016116	0.0194162
	hsa-miR-29b-2-5p	4.15089	32.3176	0.000573472	0.00440077		hsa-miR-1260a	3.94913	25.8532	0.00112481	0.00207883
	hsa-miR-134-5p	4.11887	33.521	0.000612965	0.00460376		hsa-miR-483-3p	3.9358	34.0332	0.00740316	0.00960777
	hsa-miR-595	4.10887	32.341	0.000640688	0.00471173		hsa-miR-543	3.9358	29.4498	9.94961e-05	0.00125281
	hsa-miR-196a-5p	4.0922	35.6151	0.000686625	0.0049465		hsa-miR-373-5p	3.9258	33.5515	0.00573258	0.0076943
	hsa-miR-224-3p	4.07089	31.3626	0.000707395	0.00499421		hsa-miR-30d-3p	3.92246	33.6998	0.000386846	0.00125281
	hsa-miR-940	3.97887	31.5326	0.000723072	0.0050048		hsa-miR-24-2-5p	3.9158	31.7465	0.000864441	0.0016859
	hsa-miR-9-3p	3.95116	30.456	0.000739073	0.00501717		hsa-miR-1296-5p	3.90246	32.1698	0.00531861	0.00719336
	hsa-miR-138-1-3p	3.92772	35.9543	0.000780527	0.0051986		hsa-miR-29c-3p	3.88913	28.4032	0.00026706	0.00125281
	hsa-miR-1207-5p	3.9222	35.6701	0.0008453	0.00552575		hsa-miR-590-3p	3.88889	33.6959	0.00195837	0.00318574
	hsa-miR-660-5p	3.84887	36.496	0.000918235	0.0058934		hsa-let-7a-2-3p	3.88246	32.8298	0.000263799	0.00125281
	hsa-miR-31-5p	3.84553	33.6643	0.00098994	0.00624016		hsa-miR-339-3p	3.8558	32.3465	9.73427e-05	0.00125281
	hsa-miR-1260a	3.84553	35.7201	0.00101851	0.00630763		hsa-miR-500a-5p	3.85246	34.0548	0.000279976	0.00125281
	hsa-miR-483-3p	3.81553	33.2843	0.0010555	0.00642401		hsa-miR-200c-3p	3.83703	33.0612	0.00322736	0.0047868
	hsa-miR-32-5p	3.8122	29.5743	0.00112507	0.00673138		hsa-miR-1207-5p	3.82913	34.1765	0.0268822	0.029935
	hsa-miR-34b-5p	3.80799	26.1543	0.00114919	0.00676109		hsa-miR-337-3p	3.8158	29.2965	0.00024382	0.00125281
	hsa-miR-34a-3p	3.77887	35.8726	0.00118627	0.00686084		hsa-miR-133b	3.7958	30.2665	0.000325222	0.00125281
	hsa-miR-337-5p	3.75887	30.371	0.00122446	0.00686084		hsa-miR-330-3p	3.7958	33.5565	0.000318913	0.00125281
	hsa-let-7f-2-3p	3.74553	29.1343	0.00122446	0.00686084		hsa-miR-101-5p	3.78913	34.3698	0.000844333	0.00167444
	hsa-miR-137	3.71553	35.7901	0.00131674	0.00723331		hsa-miR-221-5p	3.78246	33.0432	0.00624882	0.00829261
	hsa-miR-708-5p	3.70887	31.1643	0.00133191	0.00723331		hsa-miR-638	3.77246	33.8248	0.00063794	0.00147185
	hsa-miR-485-3p	3.7022	35.2443	0.00141816	0.007585		hsa-miR-30a-5p	3.76913	29.2098	0.000145325	0.00125281
	hsa-miR-139-3p	3.68553	33.1039	0.00164889	0.00868742		hsa-miR-196a-5p	3.76246	29.4098	0.000146377	0.00125281
	hsa-miR-675-3p	3.63553	33.2643	0.00167401	0.0086901		hsa-miR-505-5p	3.75246	32.9748	0.00292973	0.00445774
	hsa-miR-496	3.6122	36.4576	0.00170883	0.00870643		hsa-miR-221-3p	3.7458	23.6415	0.000155896	0.00125281
	hsa-miR-502-3p	3.59799	31.9693	0.00172649	0.00870643		hsa-miR-31-3p	3.7458	28.8648	0.000179132	0.00125281
	hsa-miR-28-3p	3.5922	28.121	0.00185488	0.00922213		hsa-miR-769-5p	3.7158	33.0932	0.000749578	0.00157501
	hsa-miR-132-3p	3.5722	34.9664	0.00199006	0.00973091		hsa-miR-181c-5p	3.71246	34.9182	0.0065796	0.00869887
	hsa-miR-29a-3p	3.56553	33.0643	0.00201234	0.00973091		hsa-miR-654-5p	3.6958	32.9132	0.000157358	0.00125281
	hsa-miR-483-5p	3.55553	35.9226	0.0020745	0.00989591		hsa-miR-409-3p	3.6958	28.8932	0.000755569	0.0015782
	hsa-miR-337-3p	3.54553	35.9301	0.00216896	0.0102086		hsa-miR-378a-3p	3.6758	31.1798	0.000427306	0.00129056
	hsa-miR-31-3p	3.54553	27.6143	0.00227171	0.0105515		hsa-miR-1468-5p	3.6558	32.9765	0.000283236	0.00125281
	hsa-miR-362-3p	3.51887	33.0514	0.00242468	0.0110283		hsa-miR-411-3p	3.6458	34.6615	0.000378969	0.00125281
	hsa-miR-548c-5p	3.49887	32.5693	0.00243684	0.0110283		hsa-miR-218-5p	3.6158	30.8765	0.000219127	0.00125281
	hsa-miR-323a-3p	3.44553	33.816	0.00258707	0.0112745		hsa-miR-361-3p	3.61246	33.8582	0.00135668	0.00235915
	hsa-miR-663b	3.43887	33.566	0.00258707	0.0112745		hsa-miR-31-5p	3.5958	27.1298	0.000285234	0.00125281
	hsa-miR-885-5p	3.43553	35.186	0.00258707	0.0112745		hsa-miR-29a-5p	3.59246	28.4448	0.000222166	0.00125281
	hsa-miR-34a-5p	3.4122	30.986	0.00269189	0.0115883		hsa-let-7a-3p	3.56332	38.1821	0.0204739	0.023696
	hsa-miR-193a-3p	3.38553	36.3676	0.00277305	0.0117938		hsa-miR-99b-3p	3.55913	33.5648	0.00468089	0.00647981
	hsa-miR-2110	3.37553	31.7493	0.00334123	0.0140411		hsa-miR-132-3p	3.5558	28.8965	0.000170029	0.00125281
	hsa-miR-193b-3p	3.34553	33.9414	0.00342574	0.0142269		hsa-miR-154-5p	3.5558	29.1098	0.000219703	0.00125281
	hsa-miR-219a-5p	3.3222	31.9093	0.00361079	0.0148211		hsa-miR-410-3p	3.5558	29.8665	0.000488679	0.00135424
	hsa-miR-663a	3.3022	31.761	0.0037892	0.0153468		hsa-miR-329-3p	3.53913	30.8082	0.000255145	0.00125281
	hsa-miR-664a-3p	3.3022	30.266	0.00382583	0.0153468		hsa-miR-665	3.5358	32.8498	0.000231428	0.00125281
	hsa-miR-744-5p	3.3022	32.0043	0.0040914	0.0162277		hsa-miR-539-5p	3.53246	30.8948	0.000292276	0.00125281
	hsa-miR-505-5p	3.29299	27.811	0.00425058	0.0166227		hsa-miR-30a-3p	3.5258	30.5048	0.000139623	0.00125281
	hsa-miR-133a-3p	3.28887	31.5426	0.00429125	0.0166227		hsa-let-7e-5p	3.51913	28.1315	0.000816594	0.00164826
	hsa-miR-590-3p	3.27887	35.8076	0.00433226	0.0166227		hsa-miR-193a-3p	3.51913	32.2615	0.00175367	0.00295141
	hsa-miR-432-5p	3.21553	24.471	0.00449993	0.0170428		hsa-miR-337-5p	3.5158	32.8532	0.00512509	0.00698788
	hsa-miR-1271-5p	3.19482	34.5351	0.0045383	0.0170428		hsa-miR-10a-5p	3.51246	32.0548	0.000148282	0.00125281
	hsa-miR-196b-5p	3.18887	28.7493	0.00462952	0.0172023		hsa-miR-502-5p	3.5058	34.5348	0.00581404	0.00777407
	hsa-miR-219a-1-3p	3.18116	29.5126	0.00489892	0.0180137		hsa-miR-32-5p	3.49913	31.4182	0.000231501	0.00125281
	hsa-miR-346	3.18116	34.8876	0.00503888	0.0181503		hsa-miR-379-3p	3.4958	32.0132	0.000351436	0.00125281
	hsa-miR-34b-3p	3.18116	30.991	0.00503888	0.0181503		hsa-miR-128-3p	3.48246	30.3165	0.00106469	0.00199912
	hsa-miR-504-5p	3.18116	35.1851	0.00512169	0.0182622		hsa-miR-29b-2-5p	3.48147	33.8424	0.0191742	0.0225616
	hsa-miR-324-5p	3.1722	31.9876	0.00532973	0.0188139		hsa-miR-193b-3p	3.47913	27.1348	0.000530204	0.00140723
	hsa-miR-195-5p	3.16887	29.4843	0.00574116	0.0198689		hsa-miR-150-5p	3.4758	27.4432	0.000362922	0.00125281
	hsa-miR-1249	3.14553	23.741	0.00574116	0.0198689		hsa-miR-326	3.4758	32.1365	0.00035692	0.00125281
	hsa-miR-499a-5p	3.14299	27.1343	0.00584841	0.0200436		hsa-miR-151a-3p	3.47246	30.5815	0.000418817	0.00128559
	hsa-miR-152-3p	3.1322	28.1243	0.00606835	0.0203957		hsa-miR-197-3p	3.4458	29.3148	0.000369993	0.00125281
	hsa-miR-590-5p	3.12887	27.646	0.00612449	0.0203957		hsa-miR-296-5p	3.43913	32.4248	0.000162199	0.00125281
	hsa-miR-30d-3p	3.12553	31.296	0.00612449	0.0203957		hsa-miR-382-3p	3.4358	31.0765	0.00137806	0.00238458
	hsa-miR-24-3p	3.1122	26.2476	0.00629573	0.02077		hsa-miR-377-3p	3.43246	31.8415	0.000446091	0.00131225
	hsa-miR-320b	3.1022	31.2943	0.00641228	0.0209587		hsa-miR-204-5p	3.4258	32.0715	0.0165312	0.0198487
	hsa-miR-133b	3.0822	23.661	0.0067737	0.021752		hsa-miR-127-3p	3.41246	27.3382	0.000160084	0.00125281
	hsa-miR-148b-5p	3.0722	34.5893	0.00683569	0.021752		hsa-miR-22-3p	3.39913	26.5748	0.000171255	0.00125281
	hsa-miR-218-5p	3.0722	35.281	0.00689819	0.021752		hsa-miR-186-5p	3.39913	31.5748	0.000399873	0.00126941
	hsa-miR-141-3p	3.06299	36.2801	0.006939	0.021752		hsa-miR-376a-3p	3.3958	27.0732	0.000202962	0.00125281
	hsa-miR-99a-3p	3.05799	29.7176	0.00702474	0.021752		hsa-miR-643	3.38913	37.9398	0.000164881	0.00125281
	hsa-miR-329-3p	3.0522	29.9776	0.00702474	0.021752		hsa-miR-495-3p	3.3858	28.1348	0.000695937	0.00153028
	hsa-miR-29b-3p	3.02553	30.2193	0.00708879	0.0217595		hsa-miR-361-5p	3.38246	27.8265	0.000199085	0.00125281
	hsa-miR-23a-3p	3.02553	30.8826	0.00721848	0.0219666		hsa-miR-652-3p	3.36913	29.0965	0.000178557	0.00125281
	hsa-miR-125a-5p	3.01887	34.7851	0.00730627	0.0220017		hsa-miR-497-5p	3.35913	30.1948	0.000261769	0.00125281
	hsa-miR-365a-3p	3.00553	32.8543	0.00741702	0.0220017		hsa-miR-92b-3p	3.35913	32.1682	0.000168359	0.00125281
	hsa-miR-376c-3p	3.0022	32.7076	0.00741702	0.0220017		hsa-miR-152-3p	3.35246	27.1515	0.00023393	0.00125281
	hsa-miR-193a-5p	3.0022	25.2776	0.00768937	0.0226196		hsa-miR-376a-5p	3.33246	29.4782	0.000250192	0.00125281
	hsa-miR-27a-3p	2.9922	33.2576	0.00797067	0.0232533		hsa-miR-885-5p	3.32913	31.8398	0.000360732	0.00125281
	hsa-miR-224-5p	2.98553	31.386	0.00818768	0.0236906		hsa-miR-365b-5p	3.32445	34.1547	0.0240195	0.0273512
	hsa-miR-206	2.97772	30.1926	0.00833527	0.023875		hsa-miR-130b-3p	3.31913	31.0748	0.000402757	0.00126941
	hsa-miR-125b-5p	2.96553	31.7278	0.00850493	0.023875		hsa-miR-654-3p	3.3158	31.6698	0.000180867	0.00125281
	hsa-miR-101-5p	2.9622	34.2293	0.00863765	0.023875		hsa-miR-320b	3.3158	28.2998	0.00021406	0.00125281
	hsa-miR-222-5p	2.95887	30.2126	0.00863765	0.023875		hsa-miR-487b-3p	3.30913	30.2665	0.000250048	0.00125281
	hsa-miR-543	2.9522	31.956	0.00863765	0.023875		hsa-miR-7-5p	3.29913	34.3182	0.000384408	0.00125281
	hsa-miR-128-3p	2.9522	29.3343	0.00871476	0.023875		hsa-miR-18b-5p	3.29913	28.3448	0.000176829	0.00125281
	hsa-miR-214-5p	2.94887	36.8978	0.00877099	0.023875		hsa-miR-433-3p	3.29246	32.1482	0.00109114	0.00202722
	hsa-miR-328-3p	2.9422	29.2226	0.00879249	0.023875		hsa-miR-369-3p	3.2858	28.3182	0.000383512	0.00125281
	hsa-miR-452-5p	2.9322	27.3143	0.00887084	0.0239039		hsa-miR-24-1-5p	3.28332	33.5021	0.0247139	0.0280515
	hsa-let-7i-3p	2.9322	32.6143	0.00919053	0.0243929		hsa-miR-30c-2-3p	3.27889	34.6409	0.00325061	0.00480111
	hsa-miR-23b-3p	2.91887	24.2876	0.00919053	0.0243929		hsa-miR-125b-5p	3.27246	23.0048	0.000201847	0.00125281
	hsa-miR-7-1-3p	2.90553	36.516	0.00943703	0.0248602		hsa-miR-383-5p	3.26961	33.2177	0.0249515	0.0282303
	hsa-miR-204-5p	2.89553	30.2393	0.00960462	0.0251143		hsa-miR-24-3p	3.26913	23.9232	0.000246889	0.00125281
	hsa-miR-154-5p	2.88887	30.0243	0.00968941	0.0251497		hsa-miR-20a-3p	3.26913	31.3298	0.00187102	0.0031008
	hsa-miR-502-5p	2.87553	29.7293	0.00977487	0.0251864		hsa-miR-432-5p	3.26246	31.8398	0.00054124	0.00141524
	hsa-miR-493-5p	2.87553	27.271	0.00986101	0.0252242		hsa-miR-223-3p	3.26246	24.2265	0.000192817	0.00125281
	hsa-miR-17-5p	2.87553	28.9143	0.0100353	0.0253446		hsa-miR-127-5p	3.25913	33.2348	0.000622978	0.00145706
	hsa-miR-192-5p	2.8722	25.776	0.0101235	0.0253446		hsa-miR-34a-3p	3.25913	31.1115	0.00327158	0.00481194
	hsa-miR-197-3p	2.86887	26.486	0.0101235	0.0253446		hsa-miR-874-3p	3.25913	32.3048	0.00124468	0.00221905
	hsa-miR-22-3p	2.86553	31.646	0.0103019	0.0256097		hsa-miR-23a-3p	3.2558	23.1932	0.000352844	0.00125281
	hsa-miR-331-5p	2.86299	25.236	0.0104832	0.025878		hsa-let-7f-2-3p	3.2558	32.0298	0.00100415	0.00189554
	hsa-miR-10a-5p	2.8522	28.956	0.0106672	0.0261495		hsa-miR-192-5p	3.25246	29.5315	0.000189863	0.00125281
	hsa-miR-221-3p	2.8522	32.8443	0.0111401	0.0271203		hsa-miR-542-5p	3.25246	30.7848	0.000203977	0.00125281
	hsa-miR-643	2.8422	33.976	0.0114327	0.027642		hsa-miR-514a-3p	3.23961	37.4027	0.0254825	0.0284662
	hsa-let-7b-3p	2.83553	28.6143	0.0115317	0.0276918		hsa-miR-708-3p	3.23961	37.4027	0.0254825	0.0284662
	hsa-miR-410-3p	2.8322	30.3143	0.0117321	0.0279826		hsa-miR-346	3.23961	37.4027	0.0254825	0.0284662
	hsa-miR-130a-3p	2.82887	29.1343	0.0125648	0.0297677		hsa-miR-133a-3p	3.23913	31.2015	0.000460574	0.00133265
	hsa-miR-423-5p	2.82553	29.996	0.0128904	0.0301139		hsa-miR-320a	3.23913	26.2382	0.000302471	0.00125281
	hsa-miR-29a-5p	2.81887	31.7743	0.0130006	0.0301139		hsa-miR-320c	3.23913	28.4882	0.000259535	0.00125281
	hsa-miR-222-3p	2.81553	30.9526	0.0131116	0.0301139		hsa-miR-877-5p	3.23889	33.1309	0.0199342	0.0232237
	hsa-miR-320a	2.81553	26.3893	0.0131116	0.0301139		hsa-miR-1271-5p	3.23389	34.6334	0.00703624	0.00920223
	hsa-miR-145-3p	2.80887	37.4443	0.0132234	0.0301139		hsa-miR-34a-5p	3.23246	27.5782	0.000268446	0.00125281
	hsa-miR-27b-3p	2.8022	29.2426	0.0133361	0.0301139		hsa-miR-301b	3.23246	31.0882	0.000937369	0.00179832
	hsa-miR-99b-5p	2.79553	30.7526	0.0135641	0.0301139		hsa-let-7b-3p	3.22913	29.6765	0.00261064	0.00402427
	hsa-miR-335-5p	2.77887	28.4926	0.0135641	0.0301139		hsa-miR-362-3p	3.22246	31.0665	0.000610044	0.00145706
	hsa-miR-221-5p	2.76887	31.2793	0.0135641	0.0301139		hsa-miR-16-1-3p	3.2158	31.1198	0.00250315	0.00388521
	hsa-miR-136-3p	2.76553	27.6793	0.0135641	0.0301139		hsa-miR-28-3p	3.21246	31.8148	0.000306584	0.00125281
	hsa-miR-126-5p	2.75887	27.2043	0.0136793	0.03018		hsa-miR-139-5p	3.20913	30.9132	0.000373913	0.00125281
	hsa-miR-409-3p	2.7322	34.3626	0.0140356	0.0307738		hsa-miR-532-5p	3.20246	31.9398	0.0217313	0.0250691
	hsa-miR-30a-5p	2.7222	30.301	0.0143892	0.0313543		hsa-miR-193a-5p	3.19913	30.5215	0.000493183	0.00135424
	hsa-miR-326	2.71887	34.196	0.0145107	0.031425		hsa-miR-376b-3p	3.18913	28.9198	0.000335437	0.00125281
	hsa-miR-342-3p	2.71553	32.9126	0.0152585	0.032843		hsa-miR-185-5p	3.18913	27.4032	0.000453265	0.00132233
	hsa-let-7b-5p	2.71553	32.2826	0.0155152	0.0329933		hsa-miR-362-5p	3.18703	34.1062	0.00244092	0.00382225
	hsa-miR-1256	2.7122	25.0793	0.0155152	0.0329933		hsa-miR-27a-5p	3.1858	32.8348	0.00506992	0.00696375
	hsa-miR-29c-3p	2.70887	33.3843	0.0159075	0.0336248		hsa-miR-376c-3p	3.18246	27.1398	0.00034255	0.00125281
	hsa-miR-503-5p	2.7022	27.9526	0.0160402	0.0337034		hsa-miR-30e-3p	3.1758	30.3798	0.00115003	0.00210341
	hsa-let-7e-5p	2.7022	25.6976	0.0161738	0.0337832		hsa-miR-423-5p	3.1758	27.3032	0.000246298	0.00125281
	hsa-miR-421	2.7022	27.2543	0.0164441	0.0341456		hsa-miR-23b-3p	3.17246	24.8148	0.000317132	0.00125281
	hsa-miR-127-3p	2.7022	29.351	0.0167183	0.034512		hsa-miR-126-3p	3.17246	25.4582	0.000306476	0.00125281
	hsa-miR-136-5p	2.69887	25.751	0.0169965	0.0348344		hsa-miR-27a-3p	3.1658	25.7182	0.000806029	0.00164467
	hsa-miR-194-5p	2.67887	31.501	0.0172788	0.0348344		hsa-miR-379-5p	3.14913	28.9465	0.000281701	0.00125281
	hsa-miR-1468-5p	2.67553	27.4443	0.0172788	0.0348344		hsa-miR-224-3p	3.14913	31.9332	0.00410698	0.00582235
	hsa-miR-92b-3p	2.65553	31.656	0.0174215	0.0348344		hsa-miR-28-5p	3.13913	29.7482	0.000270363	0.00125281
	hsa-miR-186-5p	2.64887	28.171	0.0175652	0.0348344		hsa-miR-100-5p	3.13246	25.0848	0.000264199	0.00125281
	hsa-miR-126-3p	2.64887	32.441	0.0175652	0.0348344		hsa-miR-328-3p	3.12246	30.6665	0.00296251	0.00448826
	hsa-miR-125a-3p	2.63887	32.481	0.0175652	0.0348344		hsa-miR-222-3p	3.11246	25.0082	0.000560309	0.00142714
	hsa-miR-361-5p	2.63553	30.6576	0.0184496	0.0361818		hsa-miR-203a	3.11203	33.3887	0.017179	0.0205566
	hsa-miR-92a-3p	2.6322	29.451	0.0184496	0.0361818		hsa-miR-147b	3.10961	34.1277	0.0279722	0.0309535
	hsa-let-7i-5p	2.62553	28.3843	0.018753	0.0365735		hsa-miR-33a-5p	3.10913	30.5265	0.000616689	0.00145706
	hsa-miR-140-5p	2.61887	33.2326	0.0190278	0.0369056		hsa-let-7b-5p	3.09913	25.9048	0.000253329	0.00125281
	hsa-miR-100-5p	2.6122	30.896	0.0192163	0.0370674		hsa-miR-125b-1-3p	3.0958	32.2298	0.000358133	0.00125281
	hsa-miR-338-3p	2.60553	30.821	0.0193729	0.0371665		hsa-miR-140-5p	3.08913	29.4332	0.00072202	0.00155935
	hsa-miR-376a-3p	2.60553	33.8476	0.0196895	0.0375697		hsa-miR-365a-3p	3.0858	27.6548	0.000468957	0.00134587
	hsa-miR-148a-3p	2.6022	28.6793	0.0198495	0.0376714		hsa-miR-382-5p	3.0758	29.0932	0.000487171	0.00135424
	hsa-miR-18b-5p	2.59887	27.8676	0.0200106	0.0377741		hsa-miR-122-5p	3.07246	27.3215	0.000348488	0.00125281
	hsa-miR-1296-5p	2.59887	30.1576	0.0203364	0.0381848		hsa-miR-95-3p	3.07147	33.4474	0.00441277	0.00618138
	hsa-miR-143-5p	2.59887	31.3076	0.0206667	0.0383966		hsa-miR-10b-5p	3.06246	29.1632	0.000280127	0.00125281
	hsa-miR-188-3p	2.59062	28.7143	0.0206667	0.0383966		hsa-miR-374b-5p	3.06246	30.1265	0.000273536	0.00125281
	hsa-miR-497-5p	2.57887	27.976	0.0208336	0.038504		hsa-miR-30e-5p	3.05913	28.1048	0.000232979	0.00125281
	hsa-miR-10b-5p	2.57887	32.7343	0.021686	0.0398707		hsa-miR-146b-5p	3.05246	34.1415	0.000793064	0.00162763
	hsa-miR-495-3p	2.5722	31.5426	0.022212	0.0405403		hsa-miR-409-5p	3.05246	32.0282	0.00192729	0.00314969
	hsa-miR-374a-5p	2.5622	32.8526	0.0222799	0.0405403		hsa-miR-136-5p	3.05246	26.7382	0.000732382	0.00155935
	hsa-miR-454-3p	2.55887	32.3851	0.0224984	0.0407279		hsa-miR-590-5p	3.0458	31.1382	0.000764345	0.00158714
	hsa-miR-491-5p	2.5522	30.9943	0.022749	0.0407634		hsa-miR-136-3p	3.03913	28.6182	0.000611656	0.00145706
	hsa-let-7c-5p	2.54887	31.6643	0.022749	0.0407634		hsa-miR-744-5p	3.03913	35.1482	0.00539594	0.0072701
	hsa-miR-199a-5p	2.54553	32.1893	0.0229305	0.0408811		hsa-miR-22-5p	3.02246	29.3198	0.000265561	0.00125281
	hsa-miR-378a-3p	2.53887	34.1393	0.0232972	0.0413263		hsa-miR-324-5p	3.02246	31.2532	0.000313512	0.00125281
	hsa-miR-30e-3p	2.5322	24.751	0.023857	0.0419388		hsa-miR-130a-3p	3.01913	29.4315	0.000570046	0.00142714
	hsa-miR-320c	2.5322	29.6226	0.0240461	0.0419388		hsa-miR-493-3p	3.00913	31.2265	0.0087235	0.0111978
	hsa-miR-411-3p	2.53116	32.2926	0.0240461	0.0419388		hsa-miR-27b-3p	3.00246	24.6665	0.000354559	0.00125281
	hsa-miR-574-3p	2.52887	27.941	0.0242366	0.0419388		hsa-let-7g-5p	2.99913	26.1115	0.000273615	0.00125281
	hsa-miR-431-5p	2.5122	28.0143	0.0242366	0.0419388		hsa-miR-664a-3p	2.99913	32.4282	0.000603263	0.00145706
	hsa-miR-493-3p	2.5022	27.3426	0.0244284	0.0420645		hsa-miR-26b-5p	2.98913	28.8198	0.000311368	0.00125281
	hsa-miR-628-3p	2.50089	32.3193	0.0252087	0.0431975		hsa-miR-30b-5p	2.9858	26.7515	0.0003779	0.00125281
	hsa-miR-20a-3p	2.4922	32.0293	0.0256069	0.0434579		hsa-miR-431-5p	2.98246	32.7832	0.00303645	0.00458063
	hsa-miR-24-2-5p	2.4922	22.756	0.0256069	0.0434579		hsa-miR-103a-3p	2.97913	25.5448	0.000288677	0.00125281
	hsa-miR-320d	2.48887	37.7914	0.02627	0.0443699		hsa-miR-423-3p	2.97913	27.5082	0.000329832	0.00125281
	hsa-miR-7-5p	2.4822	27.7976	0.0266264	0.044682		hsa-miR-301a-3p	2.9758	28.1232	0.000427748	0.00129056
	hsa-miR-145-5p	2.4722	31.5893	0.0268345	0.044682		hsa-miR-451a	2.97246	23.1582	0.000439946	0.00130505
	hsa-miR-22-5p	2.46887	24.5926	0.0268345	0.044682		hsa-miR-194-5p	2.97246	30.8748	0.000666346	0.0015274
	hsa-miR-654-3p	2.46887	28.4826	0.0272549	0.0449578		hsa-miR-493-5p	2.97246	29.8082	0.000677335	0.00153028
	hsa-miR-107	2.46553	32.1326	0.0272549	0.0449578		hsa-miR-25-3p	2.96913	26.4898	0.000370369	0.00125281
	hsa-miR-369-3p	2.46553	26.7043	0.0287713	0.0472384		hsa-miR-148a-3p	2.96913	31.2965	0.00129493	0.00227446
	hsa-miR-185-5p	2.4622	27.4543	0.0296701	0.0484886		hsa-miR-196b-3p	2.96889	33.4609	0.0039135	0.00559297
	hsa-miR-130b-5p	2.44887	28.2443	0.0301285	0.0489363		hsa-miR-299-5p	2.96246	29.7498	0.00176806	0.00295793
	hsa-miR-379-3p	2.4422	34.536	0.0303599	0.0489363		hsa-miR-30c-5p	2.96246	26.5532	0.000348444	0.00125281
	hsa-miR-21-5p	2.4422	26.6526	0.0303599	0.0489363		hsa-miR-15a-5p	2.95913	25.7682	0.000290897	0.00125281
	hsa-miR-296-5p	2.42589	30.7376	0.0305929	0.0490878		hsa-miR-15b-5p	2.95246	28.3282	0.000862935	0.0016859
	hsa-miR-30d-5p	2.42553	30.6343	0.0310636	0.0493939		hsa-miR-615-3p	2.94913	31.0832	0.000355311	0.00125281
	hsa-miR-539-5p	2.4222	30.431	0.0310636	0.0493939		hsa-miR-149-5p	2.9458	31.5448	0.00589134	0.0078477
	hsa-let-7a-5p	2.4222	30.9843	0.0315405	0.0497044		hsa-miR-484	2.93913	29.1315	0.0017558	0.00295141
	hsa-miR-99a-5p	2.41553	32.061	0.0315405	0.0497044		hsa-miR-142-3p	2.9258	24.1615	0.000326353	0.00125281
							hsa-miR-18a-3p	2.91913	32.5982	0.00512709	0.00698788
							hsa-let-7d-5p	2.9158	28.3698	0.000362894	0.00125281
							hsa-miR-92a-3p	2.9158	25.9098	0.000570046	0.00142714
							hsa-miR-339-5p	2.9158	27.5332	0.00439599	0.00618138
							hsa-miR-1972	2.91246	31.8648	0.00069547	0.00153028
							hsa-miR-148b-3p	2.91246	28.5748	0.000843848	0.00167444
							hsa-miR-20a-5p	2.90913	25.3232	0.000307397	0.00125281
							hsa-miR-1249	2.90913	32.0165	0.000737709	0.00155935
							hsa-let-7a-5p	2.89246	24.0782	0.000366753	0.00125281
							hsa-miR-144-3p	2.89246	24.6115	0.000410864	0.00128349
							hsa-miR-125a-5p	2.89246	26.7748	0.00107921	0.00201568
							hsa-miR-106a-5p	2.8858	25.8982	0.000341301	0.00125281
							hsa-miR-107	2.88246	27.7998	0.00036875	0.00125281
							hsa-miR-145-3p	2.87913	31.4348	0.00100335	0.00189554
							hsa-miR-101-3p	2.87913	26.9882	0.000305871	0.00125281
							hsa-miR-505-3p	2.87246	30.4948	0.000502237	0.00136377
							hsa-miR-574-3p	2.8658	27.2948	0.000392835	0.00126064
							hsa-miR-18a-5p	2.86246	28.4032	0.000770055	0.00158965
							hsa-miR-34c-5p	2.86246	32.2565	0.0237689	0.0271535
							hsa-miR-425-5p	2.8458	28.4848	0.000325528	0.00125281
							hsa-miR-19a-3p	2.84246	26.2565	0.000345381	0.00125281
							hsa-let-7c-5p	2.83246	28.4782	0.000415333	0.00128559
							hsa-miR-30d-5p	2.82913	27.6632	0.000838348	0.00167444
							hsa-miR-224-5p	2.82913	30.5365	0.00204166	0.00327594
							hsa-miR-126-5p	2.82913	30.8065	0.000621579	0.00145706
							hsa-miR-21-3p	2.82246	33.5765	0.00418341	0.00590698
							hsa-miR-19b-3p	2.81913	24.6348	0.000333736	0.00125281
							hsa-miR-93-5p	2.81913	25.8415	0.000346122	0.00125281
							hsa-miR-331-3p	2.8158	28.8965	0.00051095	0.00137683
							hsa-miR-452-5p	2.80246	31.9732	0.000817125	0.00164826
							hsa-let-7d-3p	2.79913	28.5415	0.000477216	0.00135424
							hsa-miR-335-5p	2.79913	32.8782	0.000494892	0.00135424
							hsa-miR-421	2.79246	31.6115	0.000675142	0.00153028
							hsa-miR-140-3p	2.78913	28.1098	0.000352394	0.00125281
							hsa-miR-98-5p	2.77246	30.4148	0.00165847	0.00281462
							hsa-miR-145-5p	2.7658	24.5715	0.000575394	0.00143038
							hsa-miR-338-3p	2.76246	32.4665	0.00127367	0.00225933
							hsa-miR-16-5p	2.74913	22.9598	0.00037086	0.00125281
							hsa-miR-181b-5p	2.7458	31.2082	0.000556051	0.00142714
							hsa-miR-99a-5p	2.72913	28.6132	0.000433128	0.00129571
							hsa-miR-106b-3p	2.7158	30.6632	0.00056854	0.00142714
							hsa-miR-369-5p	2.70913	32.6232	0.0230756	0.0265332
							hsa-miR-486-5p	2.7058	27.1415	0.000609814	0.00145706
							hsa-miR-374a-5p	2.7058	30.6248	0.000590384	0.00145706
							hsa-miR-660-5p	2.6958	31.0665	0.018056	0.0214605
							hsa-miR-106b-5p	2.69246	27.2348	0.000481822	0.00135424
							hsa-miR-188-5p	2.67913	34.2482	0.00192689	0.00314969
							hsa-miR-572	2.66889	36.9509	0.0150262	0.0182906
							hsa-miR-490-5p	2.66332	33.5121	0.0395742	0.0435192
							hsa-miR-324-3p	2.65913	31.1215	0.0007045	0.00153511
							hsa-miR-196b-5p	2.65246	31.2815	0.000857184	0.0016859
							hsa-miR-143-3p	2.65246	24.6648	0.00212111	0.00338801
							hsa-miR-15b-3p	2.64246	31.0865	0.000683285	0.00153028
							hsa-miR-26a-5p	2.63913	27.1548	0.000689564	0.00153028
							hsa-miR-181a-5p	2.60913	26.8498	0.000539126	0.00141524
							hsa-let-7f-1-3p	2.60246	33.1465	0.00123311	0.00220958
							hsa-miR-331-5p	2.58703	33.6412	0.0187595	0.0222219
							hsa-miR-99b-5p	2.58246	28.5132	0.000697944	0.00153028
							hsa-let-7e-3p	2.57913	32.6682	0.00345683	0.00502165
							hsa-let-7f-5p	2.5758	27.2698	0.00129509	0.00227446
							hsa-miR-454-3p	2.56913	30.6165	0.00122729	0.00220958
							hsa-miR-210-3p	2.55246	28.1315	0.00203912	0.00327594
							hsa-miR-219a-5p	2.55246	33.3582	0.0116264	0.0144512
							hsa-miR-21-5p	2.53913	22.1648	0.000523914	0.00140107
							hsa-miR-154-3p	2.53913	33.8915	0.00244711	0.00382225
							hsa-miR-144-5p	2.53913	28.4048	0.00140953	0.00242715
							hsa-miR-532-3p	2.51913	31.8282	0.00314299	0.00468133
							hsa-miR-195-5p	2.5158	29.7032	0.00156244	0.00266445
							hsa-miR-655-3p	2.5158	35.0165	0.0102284	0.0129878
							hsa-miR-1185-5p	2.50703	31.8312	0.0364338	0.0401911
							hsa-let-7i-5p	2.5058	26.9115	0.00116339	0.00211689
							hsa-miR-378a-5p	2.50203	34.5587	0.006828	0.0089936
							hsa-miR-455-3p	2.49913	28.7548	0.000732303	0.00155935
							hsa-miR-425-3p	2.4958	31.6498	0.00226139	0.00359581
							hsa-miR-199a-3p	2.45246	25.4815	0.000996425	0.00189554
							hsa-miR-503-5p	2.44246	30.7565	0.00376052	0.00544042
							hsa-miR-450a-5p	2.43913	29.1748	0.00121545	0.00220027
							hsa-miR-424-5p	2.42246	26.7232	0.00090327	0.00174237
							hsa-miR-215-5p	2.3858	30.8248	0.00328544	0.00481229
							hsa-miR-17-5p	2.38246	32.2098	0.0179768	0.0214385
							hsa-miR-151a-5p	2.37889	26.9609	0.0141083	0.0172925
							hsa-miR-181a-2-3p	2.3758	31.8632	0.00230988	0.00365644
							hsa-miR-411-5p	2.3758	28.6632	0.0114013	0.0142718
							hsa-miR-93-3p	2.3558	31.9898	0.0109482	0.0138521
							hsa-miR-675-3p	2.34246	35.9065	0.0196793	0.0230026
							hsa-miR-214-3p	2.2858	28.4915	0.00149837	0.0025676
							hsa-miR-455-5p	2.27913	31.8548	0.00283409	0.00434971
							hsa-miR-143-5p	2.2458	32.1982	0.00703853	0.00920223
							hsa-miR-381-3p	2.23913	31.0515	0.00197469	0.00319755
							hsa-miR-494-3p	2.14913	34.1798	0.00191368	0.00314969
							hsa-miR-155-5p	2.08913	30.8065	0.00290294	0.00443609
							hsa-miR-139-3p	2.08703	34.2062	0.0194436	0.0228026
							hsa-miR-17-3p	1.98913	30.7465	0.00233494	0.00367961
							hsa-miR-214-5p	1.9258	30.0915	0.0189024	0.0223162
							hsa-miR-7-1-3p	1.86913	32.4532	0.0203901	0.0236767
							hsa-miR-342-3p	1.80246	29.9932	0.00525834	0.00713921
							hsa-miR-125a-3p	1.74913	35.3332	0.023648	0.0271031
							hsa-let-7i-3p	1.61913	32.5182	0.00378412	0.00545222
							hsa-miR-491-5p	1.52246	33.0898	0.0407624	0.0446867
							hsa-miR-199a-5p	1.45889	27.4759	0.0272277	0.0302244
							hsa-miR-424-3p	1.27913	31.2315	0.0252781	0.0284662

## Sheet: S3_pathway_miRNA_gene_interact.
S3 TO FIG.4 miRNA gene interaction of top highly secreted miRNAs/cell
complete gene list				miRNA	Gene		miRNA	Gene		miRNA	Gene		miRNA	Gene		miRNA	Gene		miRNA	Gene		miRNA	Gene		miRNA	Gene		miRNA	Gene		miRNA	Gene		miRNA	Gene		miRNA	Gene		miRNA	Gene		miRNA	Gene		miRNA	Gene		miRNA
BUD13				hsa-let-7a-5p	BUD13		hsa-miR-100-5p	RPL5		hsa-miR-125b-5p	KMT2D		hsa-miR-126-3p	SIRT1		hsa-miR-142-3p	STRBP		hsa-miR-142-3p	S100A11		hsa-miR-144-3p	COASY		hsa-miR-145-5p	MAP1LC3B		hsa-miR-16-5p	UBE2Q1		hsa-miR-19b-3p	CLVS2		hsa-miR-20a-5p	GID4		hsa-miR-21-5p	AGO4		hsa-miR-221-3p	PHF12		hsa-miR-222-3p	MAP1B		hsa-miR-23a-3p	TSNAX		hsa-miR-223-3p
ACVR1B				hsa-let-7a-5p	ACVR1B		hsa-miR-100-5p	RPL21		hsa-miR-125b-5p	SHMT1		hsa-miR-126-3p	DNMT1		hsa-miR-142-3p	ATP2A2		hsa-miR-143-3p	ZNF264		hsa-miR-144-3p	DENND5B		hsa-miR-145-5p	ALPPL2		hsa-miR-16-5p	KDR		hsa-miR-19b-3p	ENPP4		hsa-miR-20a-5p	PRRC2C		hsa-miR-21-5p	WIBG		hsa-miR-221-3p	RPL21		hsa-miR-222-3p	TRPS1		hsa-miR-23a-3p	SSRP1		hsa-miR-223-3p
GSG2				hsa-let-7a-5p	GSG2		hsa-miR-100-5p	EEF1A1		hsa-miR-125b-5p	TOR2A		hsa-miR-126-3p	PGR		hsa-miR-142-3p	CUL5		hsa-miR-143-3p	MDM2		hsa-miR-144-3p	SLC7A2		hsa-miR-145-5p	SMAD3		hsa-miR-16-5p	FGF2		hsa-miR-19b-3p	ODF4		hsa-miR-20a-5p	PTPN4		hsa-miR-21-5p	WWP1		hsa-miR-221-3p	PTEN		hsa-miR-222-3p	SLC35A2		hsa-miR-23a-3p	DNAJC21		hsa-miR-223-3p
CASP8				hsa-let-7a-5p	CASP8		hsa-miR-100-5p	UBA2		hsa-miR-125b-5p	ERBB3		hsa-miR-126-3p	CXCR4		hsa-miR-142-3p	PSTK		hsa-miR-143-3p	TRIM71		hsa-miR-144-3p	DCUN1D1		hsa-miR-145-5p	IRS1		hsa-miR-16-5p	PDCD4		hsa-miR-19b-3p	NPTN		hsa-miR-20a-5p	BMP8B		hsa-miR-21-5p	SEC63		hsa-miR-221-3p	KPNA2		hsa-miR-222-3p	SEC24C		hsa-miR-23a-3p	VAV3		hsa-miR-223-3p
ACOT9				hsa-let-7a-5p	ACOT9		hsa-miR-100-5p	FGFR3		hsa-miR-125b-5p	MEGF9		hsa-miR-126-3p	VEGFA		hsa-miR-142-3p	MMD		hsa-miR-143-3p	MAPK7		hsa-miR-144-3p	PPIC		hsa-miR-145-5p	PRDM2		hsa-miR-16-5p	ELOVL5		hsa-miR-19b-3p	HABP4		hsa-miR-20a-5p	RFK		hsa-miR-21-5p	GLCCI1		hsa-miR-221-3p	PLOD2		hsa-miR-222-3p	RBMS2		hsa-miR-23a-3p	TNPO1		hsa-miR-223-3p
UHRF2				hsa-let-7a-5p	UHRF2		hsa-miR-100-5p	RPL10		hsa-miR-125b-5p	NCOR2		hsa-miR-126-3p	SLC7A5		hsa-miR-142-3p	ZNF236		hsa-miR-143-3p	GGA2		hsa-miR-144-3p	RREB1		hsa-miR-145-5p	KIF21A		hsa-miR-16-5p	GATAD2A		hsa-miR-19b-3p	DERL1		hsa-miR-20a-5p	PPP6R3		hsa-miR-21-5p	MRPS10		hsa-miR-221-3p	MKI67		hsa-miR-222-3p	TMEM245		hsa-miR-23a-3p	WEE1		hsa-miR-223-3p
KPNA5				hsa-let-7a-5p	KPNA5		hsa-miR-100-5p	TM9SF3		hsa-miR-125b-5p	THUMPD1		hsa-miR-126-3p	IRS1		hsa-miR-142-3p	MTFR1		hsa-miR-143-3p	PAPPA		hsa-miR-144-3p	CFTR		hsa-miR-145-5p	MYO5A		hsa-miR-16-5p	RPRD2		hsa-miR-19b-3p	LMLN		hsa-miR-20a-5p	MDM2		hsa-miR-21-5p	STAT3		hsa-miR-221-3p	TRAF4		hsa-miR-222-3p	TSPAN13		hsa-miR-23a-3p	FKBP4		hsa-miR-223-3p
SNX6				hsa-let-7a-5p	SNX6		hsa-miR-100-5p	PFN2		hsa-miR-125b-5p	CENPP		hsa-miR-126-3p	CRK		hsa-miR-142-3p	HMGA2		hsa-miR-143-3p	COL5A1		hsa-miR-144-3p	GNG12		hsa-miR-145-5p	PANK1		hsa-miR-16-5p	SNX12		hsa-miR-19b-3p	PDRG1		hsa-miR-20a-5p	NFAT5		hsa-miR-21-5p	PDCD4		hsa-miR-221-3p	CDKN1B		hsa-miR-222-3p	TIMM50		hsa-miR-23a-3p	PSAP		hsa-miR-223-3p
LIX1L				hsa-let-7a-5p	LIX1L		hsa-miR-100-5p	ATP1A2		hsa-miR-125b-5p	ZNF395		hsa-miR-126-3p	CRK		hsa-miR-142-3p	TMED4		hsa-miR-143-3p	KRAS		hsa-miR-144-3p	MOB4		hsa-miR-145-5p	ADAM17		hsa-miR-16-5p	H2AFX		hsa-miR-19b-3p	BMPR2		hsa-miR-20a-5p	PDE4C		hsa-miR-21-5p	RB1		hsa-miR-221-3p	KPNA2		hsa-miR-222-3p	NFS1		hsa-miR-23a-3p	SNTG1		hsa-miR-223-3p
NR6A1				hsa-let-7a-5p	NR6A1		hsa-miR-100-5p	CIRH1A		hsa-miR-125b-5p	ERBB2		hsa-miR-126-3p	CRK		hsa-miR-142-3p	MORF4L1		hsa-miR-143-3p	FHIT		hsa-miR-144-3p	ZNF800		hsa-miR-145-5p	FAM3C		hsa-miR-16-5p	COMMD10		hsa-miR-19b-3p	SLC38A2		hsa-miR-20a-5p	FRS2		hsa-miR-21-5p	STAG2		hsa-miR-221-3p	ATXN1		hsa-miR-222-3p	CDKN1B		hsa-miR-23a-3p	ZNF704		hsa-miR-223-3p
BTBD1				hsa-let-7a-5p	BTBD1		hsa-miR-100-5p	N4BP2		hsa-miR-125b-5p	SORT1		hsa-miR-126-3p	DNMT1		hsa-miR-142-3p	TFG		hsa-miR-143-3p	TUBB2A		hsa-miR-144-3p	ZNF827		hsa-miR-145-5p	CSRNP3		hsa-miR-16-5p	TBL3		hsa-miR-19b-3p	NUS1		hsa-miR-20a-5p	EIF2S1		hsa-miR-21-5p	APAF1		hsa-miR-221-3p	MDM2		hsa-miR-222-3p	DCAF7		hsa-miR-23a-3p	ACTN4		hsa-miR-223-3p
NHLRC3				hsa-let-7a-5p	NHLRC3		hsa-miR-100-5p	TERF2IP		hsa-miR-125b-5p	BTG2		hsa-miR-126-3p	FOXO3		hsa-miR-142-3p	KLHL15		hsa-miR-143-3p	ADH5		hsa-miR-144-3p	PLEKHA3		hsa-miR-145-5p	ZNF100		hsa-miR-16-5p	FRYL		hsa-miR-19b-3p	LCLAT1		hsa-miR-20a-5p	LYSMD3		hsa-miR-21-5p	WDR7		hsa-miR-221-3p	RPS7		hsa-miR-222-3p	PPP1R14C		hsa-miR-23a-3p	MYH2		hsa-miR-223-3p
AGO4				hsa-let-7a-5p	AGO4		hsa-miR-100-5p	RIOK2		hsa-miR-125b-5p	ULK3		hsa-miR-126-3p	TOM1		hsa-miR-142-3p	KIF5B		hsa-miR-143-3p	SAMD8		hsa-miR-144-3p	FGF2		hsa-miR-145-5p	CPEB4		hsa-miR-16-5p	FAM122B		hsa-miR-19b-3p	DAD1		hsa-miR-20a-5p	ADAR		hsa-miR-21-5p	PCBP1		hsa-miR-221-3p	HIST1H3D		hsa-miR-222-3p	IRS4		hsa-miR-23a-3p	BRWD1		hsa-miR-223-3p
ARL8B				hsa-let-7a-5p	ARL8B		hsa-miR-100-5p	GOSR1		hsa-miR-125b-5p	IGF2		hsa-miR-126-3p	SOX2		hsa-miR-142-3p	C11orf16		hsa-miR-143-3p	PHAX		hsa-miR-144-3p	ITSN2		hsa-miR-145-5p	SWAP70		hsa-miR-16-5p	PTRH1		hsa-miR-19b-3p	TNFRSF11A		hsa-miR-20a-5p	SSX2IP		hsa-miR-21-5p	FAM46A		hsa-miR-221-3p	ABHD3		hsa-miR-222-3p	TCEAL1		hsa-miR-23a-3p	NLGN4X		hsa-miR-223-3p
KRAS				hsa-let-7a-5p	KRAS		hsa-miR-100-5p	USP1		hsa-miR-125b-5p	PARP1		hsa-miR-126-3p	SPRED1		hsa-miR-142-3p	EGR2		hsa-miR-143-3p	ELP2		hsa-miR-144-3p	BTG2		hsa-miR-145-5p	DDC		hsa-miR-16-5p	MSL3		hsa-miR-19b-3p	NFIB		hsa-miR-20a-5p	PURB		hsa-miR-21-5p	TP63		hsa-miR-221-3p	CDKN1B		hsa-miR-222-3p	ICAM1		hsa-miR-23a-3p	GRTP1		hsa-miR-223-3p
WDR6				hsa-let-7a-5p	WDR6		hsa-miR-100-5p	MAP7D1		hsa-miR-125b-5p	FBN1		hsa-miR-126-3p	PLK2		hsa-miR-142-3p	FRS2		hsa-miR-143-3p	NUDT3		hsa-miR-144-3p	MAML3		hsa-miR-145-5p	WSB1		hsa-miR-16-5p	YRDC		hsa-miR-19b-3p	TMOD3		hsa-miR-20a-5p	LAPTM4A		hsa-miR-21-5p	ZMYM2		hsa-miR-221-3p	POLG		hsa-miR-222-3p	ZNF131		hsa-miR-23a-3p	LPAR1		hsa-miR-223-3p
NCKIPSD				hsa-let-7a-5p	NCKIPSD		hsa-miR-100-5p	FLT1		hsa-miR-125b-5p	PPP1CA		hsa-miR-126-3p	PIK3R2		hsa-miR-142-3p	MMGT1		hsa-miR-143-3p	PDGFRA		hsa-miR-144-3p	HOXA10		hsa-miR-145-5p	POU5F1		hsa-miR-16-5p	ETNK1		hsa-miR-19b-3p	MEF2D		hsa-miR-20a-5p	TPM4		hsa-miR-21-5p	ESYT2		hsa-miR-221-3p	LPHN2		hsa-miR-222-3p	MMP1		hsa-miR-23a-3p	ABCD1		hsa-miR-223-3p
SNX17				hsa-let-7a-5p	SNX17		hsa-miR-100-5p	UBXN2B		hsa-miR-125b-5p	CHMP3		hsa-miR-126-3p	TOM1		hsa-miR-142-3p	SGMS1		hsa-miR-143-3p	CD44		hsa-miR-144-3p	TMEM192		hsa-miR-145-5p	MAP4K2		hsa-miR-16-5p	PELO		hsa-miR-19b-3p	STX6		hsa-miR-20a-5p	LAMTOR1		hsa-miR-21-5p	HIC2		hsa-miR-221-3p	RUNX1		hsa-miR-222-3p	PRPS1L1		hsa-miR-23a-3p	VCAM1		hsa-miR-223-3p
PPP2R2A				hsa-let-7a-5p	PPP2R2A		hsa-miR-100-5p	INSIG1		hsa-miR-125b-5p	IPPK		hsa-miR-126-3p	AKT2		hsa-miR-142-3p	LGR5		hsa-miR-143-3p	ZNF429		hsa-miR-144-3p	UBE2A		hsa-miR-145-5p	MDM2		hsa-miR-16-5p	REXO1		hsa-miR-19b-3p	RRAGD		hsa-miR-20a-5p	PBXIP1		hsa-miR-21-5p	C20orf194		hsa-miR-221-3p	CDKN1C		hsa-miR-222-3p	NARS		hsa-miR-23a-3p	UBALD1		hsa-miR-223-3p
HMGA2				hsa-let-7a-5p	HMGA2		hsa-miR-100-5p	FOXP1		hsa-miR-125b-5p	TMEM101		hsa-miR-126-3p	BCL2		hsa-miR-142-3p	CDC6		hsa-miR-143-3p	C2orf15		hsa-miR-144-3p	CCT2		hsa-miR-145-5p	MYC		hsa-miR-16-5p	HNRNPDL		hsa-miR-19b-3p	EHD1		hsa-miR-20a-5p	JAK1		hsa-miR-21-5p	ZBTB38		hsa-miR-221-3p	GID8		hsa-miR-222-3p	UHRF2		hsa-miR-23a-3p	CNN2		hsa-miR-223-3p
NAA20				hsa-let-7a-5p	NAA20		hsa-miR-100-5p	MTOR		hsa-miR-125b-5p	FAT1		hsa-miR-126-3p	NFKBIA		hsa-miR-142-3p	HOXA7		hsa-miR-143-3p	USP42		hsa-miR-144-3p	TBX18		hsa-miR-145-5p	NDRG2		hsa-miR-16-5p	MRPL20		hsa-miR-19b-3p	RNASE1		hsa-miR-20a-5p	CCL1		hsa-miR-21-5p	MARCKS		hsa-miR-221-3p	RBM6		hsa-miR-222-3p	MAT2A		hsa-miR-23a-3p	MGAT5		hsa-miR-223-3p
TTC22				hsa-let-7a-5p	TTC22		hsa-miR-100-5p	RPL31		hsa-miR-125b-5p	VDAC1		hsa-miR-126-3p	PLK2		hsa-miR-142-3p	RICTOR		hsa-miR-143-3p	IL10RB		hsa-miR-144-3p	SPATA2		hsa-miR-145-5p	ERG		hsa-miR-16-5p	AGER		hsa-miR-19b-3p	ZNF217		hsa-miR-20a-5p	C14orf119		hsa-miR-21-5p	PER3		hsa-miR-221-3p	KIT		hsa-miR-222-3p	ZEB2		hsa-miR-23a-3p	FOXO3		hsa-miR-223-3p
ARID3A				hsa-let-7a-5p	ARID3A		hsa-miR-100-5p	AKT1		hsa-miR-125b-5p	NBPF11		hsa-miR-126-3p	CRK		hsa-miR-142-3p	MKLN1		hsa-miR-143-3p	YWHAB		hsa-miR-144-3p	ZC3H11A		hsa-miR-145-5p	SAMD5		hsa-miR-16-5p	DMTF1		hsa-miR-19b-3p	RBM25		hsa-miR-20a-5p	TP53		hsa-miR-21-5p	RTN4		hsa-miR-221-3p	PCDHA2		hsa-miR-222-3p	TMED7		hsa-miR-23a-3p	MYC		hsa-miR-223-3p
WASL				hsa-let-7a-5p	WASL		hsa-miR-100-5p	SMG1		hsa-miR-125b-5p	TNKS1BP1		hsa-miR-126-3p	RGS3		hsa-miR-142-3p	TRIM37		hsa-miR-143-3p	OAS3		hsa-miR-144-3p	ANKRD11		hsa-miR-145-5p	PLAGL2		hsa-miR-16-5p	EIF2A		hsa-miR-19b-3p	ZFYVE26		hsa-miR-20a-5p	L2HGDH		hsa-miR-21-5p	FOXO3		hsa-miR-221-3p	HIST1H2AE		hsa-miR-222-3p	ILK		hsa-miR-23a-3p	LDHA		hsa-miR-223-3p
COL8A1				hsa-let-7a-5p	COL8A1		hsa-miR-100-5p	MKLN1		hsa-miR-125b-5p	KHSRP		hsa-miR-126-3p	CXCR4		hsa-miR-142-3p	FYCO1		hsa-miR-143-3p	SMAD3		hsa-miR-144-3p	AP1G1		hsa-miR-145-5p	IRS1		hsa-miR-16-5p	DMTF1		hsa-miR-19b-3p	HIST2H4A		hsa-miR-20a-5p	SNTB2		hsa-miR-21-5p	RPS6KA3		hsa-miR-221-3p	PDIK1L		hsa-miR-222-3p	C5orf51		hsa-miR-23a-3p	GNB2		hsa-miR-223-3p
BIRC6				hsa-let-7a-5p	BIRC6		hsa-miR-100-5p	KANK1		hsa-miR-125b-5p	SIRT7		hsa-miR-126-3p	IRS1		hsa-miR-142-3p	TSPAN6		hsa-miR-143-3p	TUBB2A		hsa-miR-144-3p	RAP2C		hsa-miR-145-5p	ARF6		hsa-miR-16-5p	OGT		hsa-miR-19b-3p	TRIM33		hsa-miR-20a-5p	ZNF417		hsa-miR-21-5p	MKNK2		hsa-miR-221-3p	HMBOX1		hsa-miR-222-3p	SCARB2		hsa-miR-23a-3p	MYH4		hsa-miR-223-3p
DNA2				hsa-let-7a-5p	DNA2		hsa-miR-100-5p	SMARCA5		hsa-miR-125b-5p	CDH5		hsa-miR-126-3p	VEGFA		hsa-miR-142-3p	PEX26		hsa-miR-143-3p	DNMT3A		hsa-miR-144-3p	MYO5A		hsa-miR-145-5p	ADAM17		hsa-miR-16-5p	HDHD2		hsa-miR-19b-3p	KCTD20		hsa-miR-20a-5p	EFCAB11		hsa-miR-21-5p	TCF21		hsa-miR-221-3p	WEE1		hsa-miR-222-3p	RNPS1		hsa-miR-23a-3p	CNOT1		hsa-miR-223-3p
CDK6				hsa-let-7a-5p	CDK6		hsa-miR-100-5p	LRRC41		hsa-miR-125b-5p	FBXL20		hsa-miR-126-3p	GRIN2B		hsa-miR-142-3p	DNAJB6		hsa-miR-143-3p	ABAT		hsa-miR-144-3p	ANKRD11		hsa-miR-145-5p	LYPLA2		hsa-miR-16-5p	SMAD5		hsa-miR-19b-3p	SLC6A8		hsa-miR-20a-5p	MYH9		hsa-miR-21-5p	FBXL13		hsa-miR-221-3p	WDR34		hsa-miR-222-3p	MROH1		hsa-miR-23a-3p	TLR6		hsa-miR-223-3p
SMCR8				hsa-let-7a-5p	SMCR8		hsa-miR-100-5p	RPL39L		hsa-miR-125b-5p	GOLGA8A		hsa-miR-126-3p	SLC7A5		hsa-miR-142-3p	IL1A		hsa-miR-143-3p	CALM3		hsa-miR-144-3p	LRRC1		hsa-miR-145-5p	FZD7		hsa-miR-16-5p	ZRANB1		hsa-miR-19b-3p	CREB3L2		hsa-miR-20a-5p	TNIP3		hsa-miR-21-5p	NIPBL		hsa-miR-221-3p	RBMS2		hsa-miR-222-3p	AKT3		hsa-miR-23a-3p	MTAP		hsa-miR-223-3p
SLC35A4				hsa-let-7a-5p	SLC35A4		hsa-miR-100-5p	ABLIM1		hsa-miR-125b-5p	MCL1		hsa-miR-126-3p	PIK3R2		hsa-miR-142-3p	ARNTL		hsa-miR-143-3p	DBT		hsa-miR-144-3p	FAM122B		hsa-miR-145-5p	VGLL4		hsa-miR-16-5p	MICU2		hsa-miR-19b-3p	SEMA4C		hsa-miR-20a-5p	CCDC137		hsa-miR-21-5p	LIMCH1		hsa-miR-221-3p	MAT2A		hsa-miR-222-3p	CDKN1B		hsa-miR-23a-3p	ATXN7L3B		hsa-miR-223-3p
EEF2				hsa-let-7a-5p	EEF2		hsa-miR-100-5p	H2AFV		hsa-miR-125b-5p	SLC25A1		hsa-miR-126-3p	SPRED1		hsa-miR-142-3p	GNAS		hsa-miR-143-3p	FAXC		hsa-miR-144-3p	AKIRIN1		hsa-miR-145-5p	DNAJC28		hsa-miR-16-5p	SND1		hsa-miR-19b-3p	SOX4		hsa-miR-20a-5p	TMEM100		hsa-miR-21-5p	SPRY2		hsa-miR-221-3p	RNF44		hsa-miR-222-3p	EEF2		hsa-miR-23a-3p	NEK6		hsa-miR-223-3p
RDX				hsa-let-7a-5p	RDX		hsa-miR-100-5p	SAT1		hsa-miR-125b-5p	CRTC1		hsa-miR-126-3p	VEGFA		hsa-miR-142-3p	DNAJB6		hsa-miR-143-3p	HK2		hsa-miR-144-3p	NLN		hsa-miR-145-5p	SNTB1		hsa-miR-16-5p	OGT		hsa-miR-19b-3p	GRB10		hsa-miR-20a-5p	REST		hsa-miR-21-5p	YME1L1		hsa-miR-221-3p	SRP68		hsa-miR-222-3p	STAT5A		hsa-miR-23a-3p	HIST1H3B		hsa-miR-223-3p
IGF2				hsa-let-7a-5p	IGF2		hsa-miR-100-5p	KLHL15		hsa-miR-125b-5p	HDGF		hsa-miR-126-3p	RBMX		hsa-miR-142-3p	TGFBR1		hsa-miR-143-3p	MMP13		hsa-miR-144-3p	SLC46A3		hsa-miR-145-5p	CCDC80		hsa-miR-16-5p	AK2		hsa-miR-19b-3p	CLOCK		hsa-miR-20a-5p	ZNF417		hsa-miR-21-5p	MSH2		hsa-miR-221-3p	BCL2L11		hsa-miR-222-3p	WDR6		hsa-miR-23a-3p	SERINC3		hsa-miR-223-3p
RBFOX2				hsa-let-7a-5p	RBFOX2		hsa-miR-100-5p	ATP5A1		hsa-miR-125b-5p	PANK1		hsa-miR-126-3p	EGFL7		hsa-miR-142-3p	MFSD8		hsa-miR-143-3p	TIMM8A		hsa-miR-144-3p	ATF7IP		hsa-miR-145-5p	HIST1H2AH		hsa-miR-16-5p	GPR180		hsa-miR-19b-3p	RAB1A		hsa-miR-20a-5p	ARID4B		hsa-miR-21-5p	GID4		hsa-miR-221-3p	YWHAE		hsa-miR-222-3p	HSP90AA1		hsa-miR-23a-3p	IRF1		hsa-miR-223-3p
SNX2				hsa-let-7a-5p	SNX2		hsa-miR-100-5p	NOP2		hsa-miR-125b-5p	UBAP2L		hsa-miR-126-3p	CCNE2		hsa-miR-142-3p	GNAQ		hsa-miR-143-3p	TNF		hsa-miR-144-3p	TMED5		hsa-miR-145-5p	MUC1		hsa-miR-16-5p	CD44		hsa-miR-19b-3p	ZMAT3		hsa-miR-20a-5p	MCL1		hsa-miR-21-5p	PDCD4		hsa-miR-221-3p	CDKN1B		hsa-miR-222-3p	ABLIM1		hsa-miR-23a-3p	RPP14		hsa-miR-223-3p
VAV2				hsa-let-7a-5p	VAV2		hsa-miR-100-5p	C9orf66		hsa-miR-125b-5p	MYEF2		hsa-miR-126-3p	VEGFA		hsa-miR-142-3p	PPP2R2C		hsa-miR-143-3p	HAAO		hsa-miR-144-3p	KPNA2		hsa-miR-145-5p	RAB3IP		hsa-miR-16-5p	ZNF827		hsa-miR-19b-3p	CBX7		hsa-miR-20a-5p	C16orf70		hsa-miR-21-5p	PIGN		hsa-miR-221-3p	PPP1R14C		hsa-miR-222-3p	PARK7		hsa-miR-23a-3p	TNFAIP8		hsa-miR-223-3p
PRSS22				hsa-let-7a-5p	PRSS22		hsa-miR-100-5p	SNX4		hsa-miR-125b-5p	PABPC1		hsa-miR-126-3p	SLC7A5		hsa-miR-142-3p	EML4		hsa-miR-143-3p	NUBPL		hsa-miR-144-3p	MYCN		hsa-miR-145-5p	MAP3K11		hsa-miR-16-5p	RAB12		hsa-miR-19b-3p	MTRR		hsa-miR-20a-5p	COIL		hsa-miR-21-5p	PREPL		hsa-miR-221-3p	POGZ		hsa-miR-222-3p	PTEN		hsa-miR-23a-3p	ADAM9		hsa-miR-223-3p
CLDN12				hsa-let-7a-5p	CLDN12		hsa-miR-100-5p	APEX1		hsa-miR-125b-5p	RPS28		hsa-miR-126-3p	PIK3R2		hsa-miR-142-3p	ATG16L1		hsa-miR-143-3p	VOPP1		hsa-miR-144-3p	ARID1A		hsa-miR-145-5p	CDK6		hsa-miR-16-5p	FBXW7		hsa-miR-19b-3p	BLCAP		hsa-miR-20a-5p	WAC		hsa-miR-21-5p	ANP32A		hsa-miR-221-3p	NABP2		hsa-miR-222-3p	SF3B3		hsa-miR-23a-3p	PPIC		hsa-miR-223-3p
LHFPL2				hsa-let-7a-5p	LHFPL2		hsa-miR-100-5p	SMARCA5		hsa-miR-125b-5p	EPO		hsa-miR-126-3p	PIK3R2		hsa-miR-142-3p	BOD1		hsa-miR-143-3p	CTNND1		hsa-miR-144-3p	GNG12		hsa-miR-145-5p	DEK		hsa-miR-16-5p	LAMTOR5		hsa-miR-19b-3p	NACC2		hsa-miR-20a-5p	HEXIM1		hsa-miR-21-5p	SPTLC3		hsa-miR-221-3p	TICAM1		hsa-miR-222-3p	KPNA2		hsa-miR-23a-3p	FOXO3		hsa-miR-223-3p
RABL2A				hsa-let-7a-5p	RABL2A		hsa-miR-100-5p	DDX21		hsa-miR-125b-5p	NNT		hsa-miR-126-3p	ACVR2B		hsa-miR-142-3p	NEFH		hsa-miR-143-3p	KLF5		hsa-miR-144-3p	ZNF800		hsa-miR-145-5p	REL		hsa-miR-16-5p	FAT2		hsa-miR-19b-3p	TP53INP1		hsa-miR-20a-5p	GNS		hsa-miR-21-5p	BMPR2		hsa-miR-221-3p	ATXN1		hsa-miR-222-3p	TRIM44		hsa-miR-23a-3p	S100A7A		hsa-miR-223-3p
SYVN1				hsa-let-7a-5p	SYVN1		hsa-miR-100-5p	ITM2B		hsa-miR-125b-5p	BCL2L2		hsa-miR-126-3p	SPRED1		hsa-miR-142-3p	MTCH1		hsa-miR-143-3p	KLK10		hsa-miR-144-3p	TFAP4		hsa-miR-145-5p	DTD1		hsa-miR-16-5p	DYRK3		hsa-miR-19b-3p	G3BP2		hsa-miR-20a-5p	C14orf28		hsa-miR-21-5p	RHOQ		hsa-miR-221-3p	FOS		hsa-miR-222-3p	TCEB2		hsa-miR-23a-3p	RPRD2		hsa-miR-223-3p
RAD18				hsa-let-7a-5p	RAD18		hsa-miR-100-5p	MITD1		hsa-miR-125b-5p	CEBPA		hsa-miR-126-3p	SPRED1		hsa-miR-142-3p	U2SURP		hsa-miR-143-3p	STOX2		hsa-miR-144-3p	DNAJC28		hsa-miR-145-5p	AIM1		hsa-miR-16-5p	CSDE1		hsa-miR-19b-3p	NUTF2		hsa-miR-20a-5p	UBOX5		hsa-miR-21-5p	BCL6		hsa-miR-221-3p	AMMECR1L		hsa-miR-222-3p	ESR1		hsa-miR-23a-3p	DDX5		hsa-miR-223-3p
ATG12				hsa-let-7a-5p	ATG12		hsa-miR-100-5p	RAD51C		hsa-miR-125b-5p	EIF1AD		hsa-miR-126-3p	RGS3		hsa-miR-142-3p	FICD		hsa-miR-143-3p	ADAMTS4		hsa-miR-144-3p	IL20RB		hsa-miR-145-5p	IGF1R		hsa-miR-16-5p	DKC1		hsa-miR-19b-3p	STK38		hsa-miR-20a-5p	BTBD2		hsa-miR-21-5p	PTEN		hsa-miR-221-3p	SELE		hsa-miR-222-3p	GALNT3		hsa-miR-23a-3p	KIF20A		hsa-miR-223-3p
TTC26				hsa-let-7a-5p	TTC26		hsa-miR-100-5p	APBA3		hsa-miR-125b-5p	LIN28B		hsa-miR-126-3p	VEGFA		hsa-miR-142-3p	MFSD8		hsa-miR-143-3p	PTGS2		hsa-miR-144-3p	ARID1B		hsa-miR-145-5p	SOX9		hsa-miR-16-5p	ZBTB5		hsa-miR-19b-3p	FZD6		hsa-miR-20a-5p	KPNA2		hsa-miR-21-5p	KBTBD7		hsa-miR-221-3p	PRPS1L1		hsa-miR-222-3p	HERC4		hsa-miR-23a-3p	ATXN7L3B		hsa-miR-223-3p
C5orf51				hsa-let-7a-5p	C5orf51		hsa-miR-100-5p	PTP4A1		hsa-miR-125b-5p	NUP37		hsa-miR-126-3p	EGFL7		hsa-miR-142-3p	INCENP		hsa-miR-143-3p	LRAT		hsa-miR-144-3p	PEX5L		hsa-miR-145-5p	FAM45A		hsa-miR-16-5p	RNF149		hsa-miR-19b-3p	FZD6		hsa-miR-20a-5p	POLR1B		hsa-miR-21-5p	MORC3		hsa-miR-221-3p	KPNA2		hsa-miR-222-3p	PKM		hsa-miR-23a-3p	QSER1		hsa-miR-223-3p
HNRNPUL1				hsa-let-7a-5p	HNRNPUL1		hsa-miR-100-5p	CCZ1B		hsa-miR-125b-5p	EHMT1		hsa-miR-126-3p	KRAS		hsa-miR-142-3p	MFSD8		hsa-miR-143-3p	C1orf50		hsa-miR-144-3p	NUS1		hsa-miR-145-5p	ZNF451		hsa-miR-16-5p	GRAMD3		hsa-miR-19b-3p	PRUNE2		hsa-miR-20a-5p	CDKN1A		hsa-miR-21-5p	TESK2		hsa-miR-221-3p	NDUFB5		hsa-miR-222-3p	KPNA2		hsa-miR-23a-3p	ZNF267		hsa-miR-223-3p
POLR2D				hsa-let-7a-5p	POLR2D		hsa-miR-100-5p	S100A10		hsa-miR-125b-5p	SMC6		hsa-miR-126-3p	RHOU		hsa-miR-142-3p	MON1B		hsa-miR-143-3p	BCL2		hsa-miR-144-3p	TSPYL1		hsa-miR-145-5p	TIRAP		hsa-miR-16-5p	POLDIP3		hsa-miR-19b-3p	BTBD7		hsa-miR-20a-5p	KIAA0513		hsa-miR-21-5p	WFS1		hsa-miR-221-3p	SKI		hsa-miR-222-3p	RBM15B		hsa-miR-23a-3p	TNRC6A		hsa-miR-223-3p
PTP4A1				hsa-let-7a-5p	PTP4A1		hsa-miR-100-5p	PTPLAD1		hsa-miR-125b-5p	SIX1		hsa-miR-126-3p	TOM1		hsa-miR-142-3p	C16orf70		hsa-miR-143-3p	TAF1D		hsa-miR-144-3p	TOR1AIP2		hsa-miR-145-5p	NR1D2		hsa-miR-16-5p	RNASEL		hsa-miR-19b-3p	UBL3		hsa-miR-20a-5p	HIF1AN		hsa-miR-21-5p	TAF1		hsa-miR-221-3p	DYNC1H1		hsa-miR-222-3p	CDKN1B		hsa-miR-23a-3p	HS2ST1		hsa-miR-223-3p
CASP9				hsa-let-7a-5p	CASP9		hsa-miR-100-5p	IGF2		hsa-miR-125b-5p	HMGCLL1		hsa-miR-126-3p	VEGFA		hsa-miR-142-3p	RBM27		hsa-miR-143-3p	LRIT3		hsa-miR-144-3p	CCT2		hsa-miR-145-5p	BTG1		hsa-miR-16-5p	CENPF		hsa-miR-19b-3p	ZER1		hsa-miR-20a-5p	PIWIL2		hsa-miR-21-5p	BTG2		hsa-miR-221-3p	ARNT		hsa-miR-222-3p	CDKN1B		hsa-miR-23a-3p	KLF3		hsa-miR-223-3p
RHD				hsa-let-7a-5p	RHD		hsa-miR-100-5p	XRCC5		hsa-miR-125b-5p	ESRP2		hsa-miR-126-3p	ADM		hsa-miR-142-3p	NBPF3		hsa-miR-143-3p	MYPN		hsa-miR-144-3p	AGO4		hsa-miR-145-5p	SLC16A5		hsa-miR-16-5p	FURIN		hsa-miR-19b-3p	CHERP		hsa-miR-20a-5p	SERINC1		hsa-miR-21-5p	FBXL17		hsa-miR-221-3p	TMED7		hsa-miR-222-3p	SLC19A3		hsa-miR-23a-3p	HMGB2		hsa-miR-223-3p
FIGN				hsa-let-7a-5p	FIGN		hsa-miR-100-5p	CCNG1		hsa-miR-125b-5p	GABRB3		hsa-miR-126-3p	ADAM9		hsa-miR-142-3p	AKIRIN2		hsa-miR-143-3p	MAPK7		hsa-miR-144-3p	TTN		hsa-miR-145-5p	CD44		hsa-miR-16-5p	SMAD7		hsa-miR-19b-3p	HIPK1		hsa-miR-20a-5p	RBL2		hsa-miR-21-5p	PDCD4		hsa-miR-221-3p	C5orf51		hsa-miR-222-3p	UBIAD1		hsa-miR-23a-3p	KDM3B		hsa-miR-223-3p
TMED7				hsa-let-7a-5p	TMED7		hsa-miR-100-5p	HIST1H4C		hsa-miR-125b-5p	NEGR1		hsa-miR-126-3p	MMP7		hsa-miR-142-3p	MCFD2		hsa-miR-143-3p	SCN2B		hsa-miR-144-3p	CNEP1R1		hsa-miR-145-5p	RPS6KB1		hsa-miR-16-5p	ARHGAP12		hsa-miR-19b-3p	ARL6IP1		hsa-miR-20a-5p	F3		hsa-miR-21-5p	EXOC8		hsa-miR-221-3p	ZNF571		hsa-miR-222-3p	SPTBN2		hsa-miR-23a-3p	ZNF273		hsa-miR-223-3p
GADD45GIP1				hsa-let-7a-5p	GADD45GIP1		hsa-miR-100-5p	EGR2		hsa-miR-125b-5p	PRDM1		hsa-miR-126-3p	LRP6		hsa-miR-142-3p	ENTPD1		hsa-miR-143-3p	NPR1		hsa-miR-144-3p	TNPO1		hsa-miR-145-5p	ERBB4		hsa-miR-16-5p	C2orf47		hsa-miR-19b-3p	STK38		hsa-miR-20a-5p	U2SURP		hsa-miR-21-5p	ACBD5		hsa-miR-221-3p	AKT3		hsa-miR-222-3p	ATP7B		hsa-miR-23a-3p	LMAN2		hsa-miR-223-3p
DNAL1				hsa-let-7a-5p	DNAL1		hsa-miR-100-5p	ATP1B3		hsa-miR-125b-5p	ARID3A		hsa-miR-126-3p	IRS1		hsa-miR-142-3p	HOXA9		hsa-miR-143-3p	FAM71F2		hsa-miR-144-3p	USP25		hsa-miR-145-5p	E2F3		hsa-miR-16-5p	BAZ1B		hsa-miR-19b-3p	NICN1		hsa-miR-20a-5p	ABHD15		hsa-miR-21-5p	GLCCI1		hsa-miR-221-3p	CDKN1B		hsa-miR-222-3p	CDKN1B		hsa-miR-23a-3p	LMNB1		hsa-miR-223-3p
RAD21				hsa-let-7a-5p	RAD21		hsa-miR-100-5p	CUL2		hsa-miR-125b-5p	PSAT1		hsa-miR-126-3p	KCNJ1		hsa-miR-142-3p	ZNF676		hsa-miR-143-3p	SLC2A14		hsa-miR-144-3p	ZFX		hsa-miR-145-5p	BNIP3		hsa-miR-16-5p	ARHGAP12		hsa-miR-19b-3p	RNF11		hsa-miR-20a-5p	CCDC71L		hsa-miR-21-5p	FAM126B		hsa-miR-221-3p	ATP2A2		hsa-miR-222-3p	KIT		hsa-miR-23a-3p	APAF1		hsa-miR-223-3p
NCBP1				hsa-let-7a-5p	NCBP1		hsa-miR-100-5p	ZNF215		hsa-miR-125b-5p	IL6R		hsa-miR-126-3p	TEK		hsa-miR-142-3p	LRRC59		hsa-miR-143-3p	COL5A2		hsa-miR-144-3p	FAM217B		hsa-miR-145-5p	C1orf27		hsa-miR-16-5p	ENTPD1		hsa-miR-19b-3p	BMPR2		hsa-miR-20a-5p	RHOC		hsa-miR-21-5p	TGFBR3		hsa-miR-221-3p	PCDHA3		hsa-miR-222-3p	TLE3		hsa-miR-23a-3p	LDHB		hsa-miR-223-3p
FAM43A				hsa-let-7a-5p	FAM43A		hsa-miR-100-5p	RPL14		hsa-miR-125b-5p	CBFB		hsa-miR-126-3p	IRS1		hsa-miR-142-3p	GOLGA5		hsa-miR-143-3p	BRAF		hsa-miR-144-3p	PPP6C		hsa-miR-145-5p	AGPS		hsa-miR-16-5p	POLR1C		hsa-miR-19b-3p	SLC7A11		hsa-miR-20a-5p	N4BP2L2		hsa-miR-21-5p	MBNL1		hsa-miR-221-3p	FLNA		hsa-miR-222-3p	UBA1		hsa-miR-23a-3p	ATXN7L3B		hsa-miR-223-3p
RRM1				hsa-let-7a-5p	RRM1		hsa-miR-100-5p	PSMA5		hsa-miR-125b-5p	ZNF212		hsa-miR-126-3p	SLC45A3		hsa-miR-142-3p	PPP1R2		hsa-miR-143-3p	HYPK		hsa-miR-144-3p	ERCC8		hsa-miR-145-5p	TPM3		hsa-miR-16-5p	RPRD2		hsa-miR-19b-3p	SMARCA2		hsa-miR-20a-5p	LPAR2		hsa-miR-21-5p	SERPINI1		hsa-miR-221-3p	FAM35A		hsa-miR-222-3p	EPB41L2		hsa-miR-23a-3p	RPRD2		hsa-miR-223-3p
IL6				hsa-let-7a-5p	IL6		hsa-miR-100-5p	RPS8		hsa-miR-125b-5p	TP53		hsa-miR-126-3p	SLC41A2		hsa-miR-142-3p	ZCCHC14		hsa-miR-143-3p	ZNF264		hsa-miR-144-3p	FZD6		hsa-miR-145-5p	VEGFA		hsa-miR-16-5p	GPATCH4		hsa-miR-19b-3p	AHDC1		hsa-miR-20a-5p	NACC2		hsa-miR-21-5p	MTMR12		hsa-miR-221-3p	CSTF2T		hsa-miR-222-3p	TNFSF10		hsa-miR-23a-3p	ZNF281		hsa-miR-223-3p
CYP2R1				hsa-let-7a-5p	CYP2R1		hsa-miR-100-5p	WTIP		hsa-miR-125b-5p	XIAP		hsa-miR-126-3p	HOXA9		hsa-miR-142-3p	FNDC3A		hsa-miR-143-3p	SERPINE1		hsa-miR-144-3p	RAB39B		hsa-miR-145-5p	PIGF		hsa-miR-16-5p	FAM105B		hsa-miR-19b-3p	SAMD1		hsa-miR-20a-5p	NPAT		hsa-miR-21-5p	DDX55		hsa-miR-221-3p	NUFIP2		hsa-miR-222-3p	ATXN7L3		hsa-miR-23a-3p	LAMP1		hsa-miR-223-3p
TXLNG				hsa-let-7a-5p	TXLNG		hsa-miR-100-5p	HMGN1		hsa-miR-125b-5p	GOLGA8B		hsa-miR-126-3p	VEGFA		hsa-miR-142-3p	ITGAV		hsa-miR-143-3p	GLRA3		hsa-miR-144-3p	FAM122B		hsa-miR-145-5p	CLSTN2		hsa-miR-16-5p	MINK1		hsa-miR-19b-3p	PFN2		hsa-miR-20a-5p	ZNF770		hsa-miR-21-5p	TGFBR3		hsa-miR-221-3p	NAIP		hsa-miR-222-3p	PRICKLE4		hsa-miR-23a-3p	MYH10		hsa-miR-223-3p
SRSF2				hsa-let-7a-5p	SRSF2		hsa-miR-100-5p	PSMA2		hsa-miR-125b-5p	ZFYVE1		hsa-miR-126-3p	VCAM1		hsa-miR-142-3p	NUDT8		hsa-miR-143-3p	PTGS2		hsa-miR-144-3p	BTG2		hsa-miR-145-5p	FLI1		hsa-miR-16-5p	TMEM189		hsa-miR-19b-3p	TBC1D4		hsa-miR-20a-5p	CNOT6L		hsa-miR-21-5p	TRIM33		hsa-miR-221-3p	NT5DC2		hsa-miR-222-3p	HMBOX1		hsa-miR-23a-3p	SERINC3		hsa-miR-223-3p
LRRC37A2				hsa-let-7a-5p	RBFOX2		hsa-miR-100-5p	SRD5A3		hsa-miR-125b-5p	PLXND1		hsa-miR-126-3p	TWF1		hsa-miR-142-3p	LAMC1		hsa-miR-143-3p	KRAS		hsa-miR-144-3p	UBN2		hsa-miR-145-5p	FSCN1		hsa-miR-16-5p	MRRF		hsa-miR-19b-3p	SEPHS2		hsa-miR-20a-5p	AGO1		hsa-miR-21-5p	RECK		hsa-miR-221-3p	ABLIM1		hsa-miR-222-3p	ZFYVE20		hsa-miR-23a-3p	MAP1B		hsa-miR-223-3p
DNAH9				hsa-let-7a-5p	LRRC37A2		hsa-miR-100-5p	ACSL3		hsa-miR-125b-5p	E2F7		hsa-miR-126-3p	CRKL		hsa-miR-142-3p	ARL14EP		hsa-miR-143-3p	RBM27		hsa-miR-144-3p	NDUFC2-KCTD14		hsa-miR-145-5p	RBM18		hsa-miR-16-5p	PAQR3		hsa-miR-19b-3p	MOB1B		hsa-miR-20a-5p	C16orf52		hsa-miR-21-5p	MYEF2		hsa-miR-221-3p	BMF		hsa-miR-222-3p	SEPT11		hsa-miR-23a-3p	HNRNPUL1		hsa-miR-223-3p
NFKB1				hsa-let-7a-5p	SMCR8		hsa-miR-100-5p	RAB5C		hsa-miR-125b-5p	CGN		hsa-miR-126-3p	SLC41A2		hsa-miR-142-3p	RAB2A		hsa-miR-143-3p	SECISBP2L		hsa-miR-144-3p	CLIC4		hsa-miR-145-5p	SLC16A10		hsa-miR-16-5p	CACNA2D1		hsa-miR-19b-3p	CAMSAP2		hsa-miR-20a-5p	NRBP1		hsa-miR-21-5p	PTEN		hsa-miR-221-3p	STMN1		hsa-miR-222-3p	CKAP2		hsa-miR-23a-3p	HAPLN1		hsa-miR-223-3p
MYO9A				hsa-let-7a-5p	DNAH9		hsa-miR-100-5p	SNRNP27		hsa-miR-125b-5p	GRIN2A		hsa-miR-126-3p	TWF2		hsa-miR-142-3p	C9orf72		hsa-miR-143-3p	RUNDC1		hsa-miR-144-3p	RAC1		hsa-miR-145-5p	BNIP3		hsa-miR-16-5p	RIOK3		hsa-miR-19b-3p	FRS2		hsa-miR-20a-5p	HIF1A		hsa-miR-21-5p	COL5A2		hsa-miR-221-3p	LIMS1		hsa-miR-222-3p	MAT2A		hsa-miR-23a-3p	CELF1		hsa-miR-223-3p
UBE2Q1				hsa-let-7a-5p	NFKB1		hsa-miR-100-5p	SMAD7		hsa-miR-125b-5p	STC2		hsa-miR-126-3p	CRK		hsa-miR-142-3p	HSFY2		hsa-miR-143-3p	IGF1R		hsa-miR-144-3p	SPATA2		hsa-miR-145-5p	SESN2		hsa-miR-16-5p	HSPD1		hsa-miR-19b-3p	PTEN		hsa-miR-20a-5p	LIMA1		hsa-miR-21-5p	OSR1		hsa-miR-221-3p	NUF2		hsa-miR-222-3p	MAK16		hsa-miR-23a-3p	EGLN3		hsa-miR-223-3p
ZNF609				hsa-let-7a-5p	MYO9A		hsa-miR-100-5p	SMPDL3B		hsa-miR-125b-5p	EPOR		hsa-miR-126-3p	ADAM9		hsa-miR-142-3p	MMGT1		hsa-miR-143-3p	FSCN1		hsa-miR-144-3p	JMY		hsa-miR-145-5p	CRAMP1L		hsa-miR-16-5p	PDE4D		hsa-miR-19b-3p	PDE4D		hsa-miR-20a-5p	ARID4B		hsa-miR-21-5p	ZNF292		hsa-miR-221-3p	GALNT3		hsa-miR-222-3p	TNRC6B		hsa-miR-23a-3p	MCU		hsa-miR-223-3p
RIOK3				hsa-let-7a-5p	UBE2Q1		hsa-miR-100-5p	SOGA1		hsa-miR-125b-5p	STARD8		hsa-miR-126-3p	SLC39A6		hsa-miR-142-3p	SS18		hsa-miR-143-3p	DDX6		hsa-miR-144-3p	FZD6		hsa-miR-145-5p	NDUFS2		hsa-miR-16-5p	SEC24A		hsa-miR-19b-3p	ACTB		hsa-miR-20a-5p	GATA6		hsa-miR-21-5p	ADNP		hsa-miR-221-3p	C15orf40		hsa-miR-222-3p	BBC3		hsa-miR-23a-3p	HS2ST1		hsa-miR-223-3p
THBS1				hsa-let-7a-5p	ZNF609		hsa-miR-100-5p	ID1		hsa-miR-125b-5p	DUSP6		hsa-miR-126-3p	CD97		hsa-miR-142-3p	HMGA1		hsa-miR-143-3p	MAPK7		hsa-miR-144-3p	EZH2		hsa-miR-145-5p	FLI1		hsa-miR-16-5p	RECK		hsa-miR-19b-3p	FOXP1		hsa-miR-20a-5p	BLOC1S3		hsa-miR-21-5p	SETD2		hsa-miR-221-3p	PAFAH1B2		hsa-miR-222-3p	QKI		hsa-miR-23a-3p	ZNF485		hsa-miR-223-3p
PLEKHA3				hsa-let-7a-5p	RIOK3		hsa-miR-100-5p	SAP30L		hsa-miR-125b-5p	ADRM1		hsa-miR-126-3p	IGFBP2		hsa-miR-142-3p	ALAD		hsa-miR-143-3p	ZNF607		hsa-miR-144-3p	FAM122B		hsa-miR-145-5p	AQR		hsa-miR-16-5p	TMEM100		hsa-miR-19b-3p	WNK3		hsa-miR-20a-5p	MARCH6		hsa-miR-21-5p	CLCN5		hsa-miR-221-3p	PPP1R15B		hsa-miR-222-3p	FAT1		hsa-miR-23a-3p	FANCG		hsa-miR-223-3p
TUBB2A				hsa-let-7a-5p	THBS1		hsa-miR-100-5p	CCNYL1		hsa-miR-125b-5p	PCTP		hsa-miR-126-3p	SOX2		hsa-miR-142-3p	FAM127B		hsa-miR-143-3p	GXYLT1		hsa-miR-144-3p	ZC3H11A		hsa-miR-145-5p	MAP2K6		hsa-miR-16-5p	NT5DC1		hsa-miR-19b-3p	ATP6V1C1		hsa-miR-20a-5p	NPNT		hsa-miR-21-5p	DDHD2		hsa-miR-221-3p	CDKN1B		hsa-miR-222-3p	FOS		hsa-miR-23a-3p	ZNF682		hsa-miR-223-3p
COIL				hsa-let-7a-5p	PLEKHA3		hsa-miR-100-5p	THAP2		hsa-miR-125b-5p	AKT1		hsa-miR-126-3p	CXCR4		hsa-miR-142-3p	AFF1		hsa-miR-143-3p	MMP13		hsa-miR-144-3p	BTG2		hsa-miR-145-5p	EGFR		hsa-miR-16-5p	GTPBP8		hsa-miR-19b-3p	SMAD4		hsa-miR-20a-5p	FAM213A		hsa-miR-21-5p	MTMR9		hsa-miR-221-3p	IQCE		hsa-miR-222-3p	MDM2		hsa-miR-23a-3p	PTPN11		hsa-miR-223-3p
NUCB2				hsa-let-7a-5p	HMGA2		hsa-miR-100-5p	XRCC6		hsa-miR-125b-5p	SUGP2		hsa-miR-126-3p	CXCL12		hsa-miR-142-3p	DOCK10		hsa-miR-143-3p	SLC25A25		hsa-miR-144-3p	TTC37		hsa-miR-145-5p	STAT1		hsa-miR-16-5p	GNAL		hsa-miR-19b-3p	RAP1A		hsa-miR-20a-5p	ATP8B2		hsa-miR-21-5p	SETD1B		hsa-miR-221-3p	CDKN1B		hsa-miR-222-3p	SELE		hsa-miR-23a-3p	KLF12		hsa-miR-223-3p
COX14				hsa-let-7a-5p	TUBB2A		hsa-miR-100-5p	MAFG		hsa-miR-125b-5p	PTOV1		hsa-miR-126-3p	PIK3CG		hsa-miR-142-3p	RAB39A		hsa-miR-143-3p	FAXC		hsa-miR-144-3p	TMBIM6		hsa-miR-145-5p	POU5F1		hsa-miR-16-5p	SP1		hsa-miR-19b-3p	ARHGAP1		hsa-miR-20a-5p	PDRG1		hsa-miR-21-5p	RPS7		hsa-miR-221-3p	CDKN1B		hsa-miR-222-3p	ZFP1		hsa-miR-23a-3p	HES1		hsa-miR-223-3p
PMPCA				hsa-let-7a-5p	COIL		hsa-miR-100-5p	SLC17A8		hsa-miR-125b-5p	TP53INP1		hsa-miR-126-3p	TCF4		hsa-miR-142-3p	MON1B		hsa-miR-143-3p	ERBB3		hsa-miR-144-3p	ITSN2		hsa-miR-145-5p	AP1G1		hsa-miR-16-5p	MSANTD4		hsa-miR-19b-3p	RORA		hsa-miR-20a-5p	NETO2		hsa-miR-21-5p	ZNF667		hsa-miR-221-3p	PSMD4		hsa-miR-222-3p	PCNT		hsa-miR-23a-3p	FAM222B		hsa-miR-223-3p
PCGF3				hsa-let-7a-5p	NUCB2		hsa-miR-100-5p	IGF1R		hsa-miR-125b-5p	STOX2		hsa-miR-126-3p	PITPNC1		hsa-miR-142-3p	YES1		hsa-miR-143-3p	MACC1		hsa-miR-144-3p	CERK		hsa-miR-145-5p	LMNB2		hsa-miR-16-5p	PURA		hsa-miR-19b-3p	USP37		hsa-miR-20a-5p	PPP1R3B		hsa-miR-21-5p	RPS7		hsa-miR-221-3p	SLC19A3		hsa-miR-222-3p	MDM2		hsa-miR-23a-3p	ITPKC		hsa-miR-223-3p
MTUS1				hsa-let-7a-5p	COX14		hsa-miR-100-5p	ESR1		hsa-miR-125b-5p	C2orf15		hsa-miR-126-3p	PIK3CG		hsa-miR-142-3p	MMGT1		hsa-miR-143-3p	IKZF3		hsa-miR-144-3p	ZCCHC2		hsa-miR-145-5p	FSCN1		hsa-miR-16-5p	UBR3		hsa-miR-19b-3p	DBN1		hsa-miR-20a-5p	RUNX1		hsa-miR-21-5p	PLEKHA1		hsa-miR-221-3p	SPTSSA		hsa-miR-222-3p	GTF3C5		hsa-miR-23a-3p	SESN2		hsa-miR-223-3p
ZBTB8OS				hsa-let-7a-5p	PMPCA		hsa-miR-100-5p	ODC1		hsa-miR-125b-5p	RPL35A		hsa-miR-126-3p	ADAM9		hsa-miR-142-3p	PPFIA1		hsa-miR-143-3p	NFYB		hsa-miR-144-3p	ANKRD12		hsa-miR-145-5p	CDKN1A		hsa-miR-16-5p	SRP72		hsa-miR-19b-3p	MMGT1		hsa-miR-20a-5p	RRM2		hsa-miR-21-5p	RECK		hsa-miR-221-3p	FBN3		hsa-miR-222-3p	KPNA2		hsa-miR-23a-3p	TOP1		hsa-miR-223-3p
RPSA				hsa-let-7a-5p	PCGF3		hsa-miR-100-5p	VPS45		hsa-miR-125b-5p	CDRT4		hsa-miR-126-3p	CRK		hsa-miR-142-3p	ARNTL		hsa-miR-143-3p	NR2C2		hsa-miR-144-3p	BZW1		hsa-miR-145-5p	DDX6		hsa-miR-16-5p	MED12		hsa-miR-19b-3p	ST13		hsa-miR-20a-5p	NIN		hsa-miR-21-5p	FASLG		hsa-miR-221-3p	TIAM1		hsa-miR-222-3p	MINK1		hsa-miR-23a-3p	SPRY2		hsa-miR-223-3p
MRPL15				hsa-let-7a-5p	FAM43A		hsa-miR-100-5p	MAP4		hsa-miR-125b-5p	ZNF177		hsa-miR-126-3p	MERTK		hsa-miR-142-3p	EPM2AIP1		hsa-miR-143-3p	MAPK7		hsa-miR-144-3p	TAOK1		hsa-miR-145-5p	ANKRD28		hsa-miR-16-5p	VEGFA		hsa-miR-19b-3p	ZNF644		hsa-miR-20a-5p	LAMTOR1		hsa-miR-21-5p	HPS5		hsa-miR-221-3p	DDIT4		hsa-miR-222-3p	CDKN1B		hsa-miR-23a-3p	VAV3		hsa-miR-223-3p
VCL				hsa-let-7a-5p	MTUS1		hsa-miR-100-5p	PRDX1		hsa-miR-125b-5p	IRF4		hsa-miR-126-3p	SPRED1		hsa-miR-142-3p	C5orf24		hsa-miR-143-3p	SLC25A16		hsa-miR-144-3p	PANK1		hsa-miR-145-5p	MUC19		hsa-miR-16-5p	KCNC4		hsa-miR-19b-3p	MOB1B		hsa-miR-20a-5p	RBM20		hsa-miR-21-5p	RNF6		hsa-miR-221-3p	CASP3		hsa-miR-222-3p	MYC		hsa-miR-23a-3p	SLC6A15		hsa-miR-223-3p
ZNF260				hsa-let-7a-5p	ZBTB8OS		hsa-miR-100-5p	DAZAP2		hsa-miR-125b-5p	MMP13		hsa-miR-126-3p	PTPN7		hsa-miR-142-3p	ATP2A2		hsa-miR-143-3p	JAG1		hsa-miR-144-3p	LCOR		hsa-miR-145-5p	DUSP6		hsa-miR-16-5p	RASSF5		hsa-miR-19b-3p	HIST2H4B		hsa-miR-20a-5p	WDR89		hsa-miR-21-5p	CCDC14		hsa-miR-221-3p	CNRIP1		hsa-miR-222-3p	ERCC6L		hsa-miR-23a-3p	ZNF257		hsa-miR-223-3p
STRN				hsa-let-7a-5p	HMGA2		hsa-miR-100-5p	ORC5		hsa-miR-125b-5p	CSNK2A1		hsa-miR-126-3p	E2F1		hsa-miR-142-3p	CDCA4		hsa-miR-143-3p	THAP1		hsa-miR-144-3p	ARL5B		hsa-miR-145-5p	NUP43		hsa-miR-16-5p	CDK1		hsa-miR-19b-3p	PTPRG		hsa-miR-20a-5p	ZNFX1		hsa-miR-21-5p	EPM2AIP1		hsa-miR-221-3p	TNFSF10		hsa-miR-222-3p	CASKIN2		hsa-miR-23a-3p	HS2ST1		hsa-miR-223-3p
LRRC42				hsa-let-7a-5p	RPSA		hsa-miR-100-5p	LDHB		hsa-miR-125b-5p	BTBD3					hsa-miR-142-3p	TMEM245		hsa-miR-143-3p	HNF4A		hsa-miR-144-3p	GOLGA7		hsa-miR-145-5p	TMOD3		hsa-miR-16-5p	USP48		hsa-miR-19b-3p	NDEL1		hsa-miR-20a-5p	C3orf38		hsa-miR-21-5p	SMARCA4		hsa-miR-221-3p	PCDHA4		hsa-miR-222-3p	CASC3		hsa-miR-23a-3p	ZNF208		hsa-miR-223-3p
PRDM1				hsa-let-7a-5p	MRPL15		hsa-miR-100-5p	CAPNS1		hsa-miR-125b-5p	PPM1H					hsa-miR-142-3p	CSRP2		hsa-miR-143-3p	AKT1		hsa-miR-144-3p	MFSD6		hsa-miR-145-5p	CD28		hsa-miR-16-5p	FAM129B		hsa-miR-19b-3p	XIAP		hsa-miR-20a-5p	MED18		hsa-miR-21-5p	TMEM56		hsa-miR-221-3p	CCDC142		hsa-miR-222-3p	CDKN1C		hsa-miR-23a-3p	PTPDC1		hsa-miR-223-3p
NUDT4				hsa-let-7a-5p	VCL		hsa-miR-100-5p	MAPK6		hsa-miR-125b-5p	BCL2L2					hsa-miR-142-3p	C18orf25		hsa-miR-143-3p	SFT2D2		hsa-miR-144-3p	TEX9		hsa-miR-145-5p	FZD6		hsa-miR-16-5p	CALR		hsa-miR-19b-3p	AGO1		hsa-miR-20a-5p	ABCA1		hsa-miR-21-5p	MEF2C		hsa-miR-221-3p	SLC25A36		hsa-miR-222-3p	SORT1		hsa-miR-23a-3p	HCFC1		hsa-miR-223-3p
EMILIN2				hsa-let-7a-5p	ZNF260		hsa-miR-100-5p	RPS15A		hsa-miR-125b-5p	TP53					hsa-miR-142-3p	CBY1		hsa-miR-143-3p	SLC25A16		hsa-miR-144-3p	MTOR		hsa-miR-145-5p	CDH2		hsa-miR-16-5p	SEC24B		hsa-miR-19b-3p	SPG20		hsa-miR-20a-5p	CDK16		hsa-miR-21-5p	TET1		hsa-miR-221-3p	PTBP3		hsa-miR-222-3p	SLC10A7		hsa-miR-23a-3p	IL8		hsa-miR-223-3p
PLXND1				hsa-let-7a-5p	STRN		hsa-miR-100-5p	FGFR3		hsa-miR-125b-5p	SLC19A1					hsa-miR-142-3p	MEF2D		hsa-miR-143-3p	LRAT		hsa-miR-144-3p	NGFRAP1		hsa-miR-145-5p	CEP19		hsa-miR-16-5p	ZNRF2		hsa-miR-19b-3p	MTMR6		hsa-miR-20a-5p	TNFRSF10B		hsa-miR-21-5p	PDCD4		hsa-miR-221-3p	LYSMD1		hsa-miR-222-3p	FAM35A		hsa-miR-23a-3p	ZBTB10		hsa-miR-223-3p
BAZ2A				hsa-let-7a-5p	LRRC42		hsa-miR-100-5p	DPY19L4		hsa-miR-125b-5p	IRF4					hsa-miR-142-3p	AFF1		hsa-miR-143-3p	UCK2		hsa-miR-144-3p	RAC1		hsa-miR-145-5p	NUDT1		hsa-miR-16-5p	WARS		hsa-miR-19b-3p	BTF3L4		hsa-miR-20a-5p	CADM2		hsa-miR-21-5p	PTEN		hsa-miR-221-3p	ESR1		hsa-miR-222-3p	ARL6IP1		hsa-miR-23a-3p	CENPM		hsa-miR-223-3p
AKAP8				hsa-let-7a-5p	PRDM1		hsa-miR-100-5p	ORC2		hsa-miR-125b-5p	CNGB1					hsa-miR-142-3p	ZNF701		hsa-miR-143-3p	YARS		hsa-miR-144-3p	STAMBP		hsa-miR-145-5p	HDAC2		hsa-miR-16-5p	RIMS3		hsa-miR-19b-3p	CAMTA1		hsa-miR-20a-5p	FAXC		hsa-miR-21-5p	MEIS1		hsa-miR-221-3p	LRP6		hsa-miR-222-3p	MARS		hsa-miR-23a-3p	KIAA1210		hsa-miR-223-3p
TRIM71				hsa-let-7a-5p	NUDT4		hsa-miR-100-5p	FGFR3		hsa-miR-125b-5p	TP53					hsa-miR-142-3p	LYRM4		hsa-miR-143-3p	CMPK1		hsa-miR-144-3p	ATXN1L		hsa-miR-145-5p	YES1		hsa-miR-16-5p	TOR4A		hsa-miR-19b-3p	DDX3X		hsa-miR-20a-5p	ERAP1		hsa-miR-21-5p	ZNF35		hsa-miR-221-3p	ZNF275		hsa-miR-222-3p	RPL12		hsa-miR-23a-3p	CXCL12		hsa-miR-223-3p
C1orf210				hsa-let-7a-5p	EMILIN2		hsa-miR-100-5p	COL4A1		hsa-miR-125b-5p	ERBB2					hsa-miR-142-3p	ARNTL		hsa-miR-143-3p	SPTLC2		hsa-miR-144-3p	ZBTB7A		hsa-miR-145-5p	PHF17		hsa-miR-16-5p	HIST1H2BK		hsa-miR-19b-3p	RHEBL1		hsa-miR-20a-5p	HIST1H2BJ		hsa-miR-21-5p	KLHL15		hsa-miR-221-3p	FARSA		hsa-miR-222-3p	TRAP1		hsa-miR-23a-3p	ZNF281		hsa-miR-223-3p
NRAS				hsa-let-7a-5p	PLXND1		hsa-miR-100-5p	DNMT1		hsa-miR-125b-5p	HBS1L					hsa-miR-142-3p	DAG1		hsa-miR-143-3p	SLC35F6		hsa-miR-144-3p	PURB		hsa-miR-145-5p	VGLL4		hsa-miR-16-5p	OSCAR		hsa-miR-19b-3p	TMEM64		hsa-miR-20a-5p	INTS3		hsa-miR-21-5p	RASGRP1		hsa-miR-221-3p	RBM33		hsa-miR-222-3p	EIF3B		hsa-miR-23a-3p	PDIA6		hsa-miR-223-3p
CDKN1A				hsa-let-7a-5p	BAZ2A		hsa-miR-100-5p	NSF		hsa-miR-125b-5p	CTDSP1					hsa-miR-142-3p	IFNAR2		hsa-miR-143-3p	USP42		hsa-miR-144-3p	GRIK3		hsa-miR-145-5p	ZNF426		hsa-miR-16-5p	PIK3R1		hsa-miR-19b-3p	CBX5		hsa-miR-20a-5p	TXLNA		hsa-miR-21-5p	MAP3K1		hsa-miR-221-3p	BBC3		hsa-miR-222-3p	STMN1		hsa-miR-23a-3p	TNRC6A		hsa-miR-223-3p
MCM3AP				hsa-let-7a-5p	AKAP8		hsa-miR-100-5p	MTOR		hsa-miR-125b-5p	UBR7					hsa-miR-142-3p	CALM1		hsa-miR-143-3p	DCTN6		hsa-miR-144-3p	MFSD6		hsa-miR-145-5p	PNMA3		hsa-miR-16-5p	SLC3A2		hsa-miR-19b-3p	FAM46A		hsa-miR-20a-5p	CCND1		hsa-miR-21-5p	TM9SF3		hsa-miR-221-3p	EXOC8		hsa-miR-222-3p	ZNF805		hsa-miR-23a-3p	TMEM170A		hsa-miR-223-3p
SLC5A6				hsa-let-7a-5p	TRIM71		hsa-miR-100-5p	ATM		hsa-miR-125b-5p	S100A8					hsa-miR-142-3p	TRIM36		hsa-miR-143-3p	NFIC		hsa-miR-144-3p	RORA		hsa-miR-145-5p	BRAF		hsa-miR-16-5p	TASP1		hsa-miR-19b-3p	TGOLN2		hsa-miR-20a-5p	TBL1XR1		hsa-miR-21-5p	MPP5		hsa-miR-221-3p	WEE1		hsa-miR-222-3p	RNF215		hsa-miR-23a-3p	PLAG1		hsa-miR-223-3p
ZNF644				hsa-let-7a-5p	C1orf210		hsa-miR-100-5p	TMED4		hsa-miR-125b-5p	MFSD9					hsa-miR-142-3p	FRS2		hsa-miR-143-3p	KIAA0930		hsa-miR-144-3p	ARAP2		hsa-miR-145-5p	SNTB1		hsa-miR-16-5p	AKT3		hsa-miR-19b-3p	CNOT4		hsa-miR-20a-5p	NUP35		hsa-miR-21-5p	AGGF1		hsa-miR-221-3p	HECTD2		hsa-miR-222-3p	FICD		hsa-miR-23a-3p	KIF22		hsa-miR-223-3p
CTPS1				hsa-let-7a-5p	NRAS		hsa-miR-100-5p	UBN2		hsa-miR-125b-5p	SH3BP5L					hsa-miR-142-3p	HGS		hsa-miR-143-3p	IGFBP5		hsa-miR-144-3p	ZFP36L2		hsa-miR-145-5p	SERPINE1		hsa-miR-16-5p	GNB1		hsa-miR-19b-3p	ARHGAP12		hsa-miR-20a-5p	ESR2		hsa-miR-21-5p	CDC25A		hsa-miR-221-3p	RPLP0		hsa-miR-222-3p	PAN2		hsa-miR-23a-3p	FAS		hsa-miR-223-3p
IKZF3				hsa-let-7a-5p	CDKN1A		hsa-miR-100-5p	BMPR2		hsa-miR-125b-5p	PLEKHA8					hsa-miR-142-3p	PROM1		hsa-miR-143-3p	SECISBP2L		hsa-miR-144-3p	MAP3K4		hsa-miR-145-5p	YES1		hsa-miR-16-5p	TMEM43		hsa-miR-19b-3p	ALG1		hsa-miR-20a-5p	LEPROT		hsa-miR-21-5p	C15orf52		hsa-miR-221-3p	CDKN1B		hsa-miR-222-3p	CHORDC1		hsa-miR-23a-3p	THUMPD3		hsa-miR-223-3p
LMNA				hsa-let-7a-5p	MCM3AP		hsa-miR-100-5p	NUDCD2		hsa-miR-125b-5p	EHD1					hsa-miR-142-3p	CEP192		hsa-miR-143-3p	FAM120AOS		hsa-miR-144-3p	AKIRIN1		hsa-miR-145-5p	NFATC1		hsa-miR-16-5p	CAMKV		hsa-miR-19b-3p	TNPO2		hsa-miR-20a-5p	SLC35F5		hsa-miR-21-5p	HIF1A		hsa-miR-221-3p	PELO		hsa-miR-222-3p	MIDN		hsa-miR-23a-3p	TPM3		hsa-miR-223-3p
ZNF417				hsa-let-7a-5p	SLC5A6		hsa-miR-100-5p	PCBP2		hsa-miR-125b-5p	LSM14B					hsa-miR-142-3p	HSPA1B		hsa-miR-143-3p	GALNT6		hsa-miR-144-3p	FAM217B		hsa-miR-145-5p	AAED1		hsa-miR-16-5p	RNF38		hsa-miR-19b-3p	RAB21		hsa-miR-20a-5p	UGCG		hsa-miR-21-5p	ATF7IP		hsa-miR-221-3p	ZFP1		hsa-miR-222-3p	ZNF460		hsa-miR-23a-3p	ERBB2IP		hsa-miR-223-3p
ZNF566				hsa-let-7a-5p	ZNF644		hsa-miR-100-5p	RAP1B		hsa-miR-125b-5p	DDX50					hsa-miR-142-3p	DCTN4		hsa-miR-143-3p	ZC3HAV1L		hsa-miR-144-3p	YOD1		hsa-miR-145-5p	EPAS1		hsa-miR-16-5p	FZD9		hsa-miR-19b-3p	GRB10		hsa-miR-20a-5p	M6PR		hsa-miR-21-5p	IVNS1ABP		hsa-miR-221-3p	CSTF2T		hsa-miR-222-3p	DDX6		hsa-miR-23a-3p	FAU		hsa-miR-223-3p
TCERG1				hsa-let-7a-5p	CTPS1		hsa-miR-100-5p	BECN1		hsa-miR-125b-5p	PPP1CA					hsa-miR-142-3p	KMT2A		hsa-miR-143-3p	USP42		hsa-miR-144-3p	RBM8A		hsa-miR-145-5p	POU5F1		hsa-miR-16-5p	HOXA3		hsa-miR-19b-3p	DDX6		hsa-miR-20a-5p	CDIPT		hsa-miR-21-5p	PTEN		hsa-miR-221-3p	SPRYD3		hsa-miR-222-3p	PAFAH1B2		hsa-miR-23a-3p	ZNF701		hsa-miR-223-3p
CLPB				hsa-let-7a-5p	IKZF3		hsa-miR-100-5p	OXCT1		hsa-miR-125b-5p	ZNF592					hsa-miR-142-3p	ZNF473		hsa-miR-143-3p	KAT7		hsa-miR-144-3p	GRIK3		hsa-miR-145-5p	TPRG1		hsa-miR-16-5p	FAM103A1		hsa-miR-19b-3p	SKIL		hsa-miR-20a-5p	TNFRSF21		hsa-miR-21-5p	FERMT2		hsa-miR-221-3p	CDKN1B		hsa-miR-222-3p	MDH2		hsa-miR-23a-3p	RPRD2		hsa-miR-223-3p
HMGA1				hsa-let-7a-5p	LMNA		hsa-miR-100-5p	UBE2E3		hsa-miR-125b-5p	GJB7					hsa-miR-142-3p	CTNNB1		hsa-miR-143-3p	SDC1		hsa-miR-144-3p	ATXN1		hsa-miR-145-5p	NIPSNAP1		hsa-miR-16-5p	SACM1L		hsa-miR-19b-3p	CPD		hsa-miR-20a-5p	MCL1		hsa-miR-21-5p	SOCS5		hsa-miR-221-3p	CHSY1		hsa-miR-222-3p	KIF3B		hsa-miR-23a-3p	SSR1		hsa-miR-223-3p
GCN1L1				hsa-let-7a-5p	ZNF417		hsa-miR-100-5p	HMGB1		hsa-miR-125b-5p	HRH4					hsa-miR-142-3p	TROVE2		hsa-miR-143-3p	OR7D2		hsa-miR-144-3p	ZNF645		hsa-miR-145-5p	SOX9		hsa-miR-16-5p	AMOTL1		hsa-miR-19b-3p	ZNF800		hsa-miR-20a-5p	SP4		hsa-miR-21-5p	PTGFR		hsa-miR-221-3p	ASXL2		hsa-miR-222-3p	KIT		hsa-miR-23a-3p	PTPN14		hsa-miR-223-3p
ABT1				hsa-let-7a-5p	ZNF566		hsa-miR-100-5p	MMP13		hsa-miR-125b-5p	ERBB2					hsa-miR-142-3p	SCAMP1		hsa-miR-143-3p	GTF2H5		hsa-miR-144-3p	LCOR		hsa-miR-145-5p	CXorf23		hsa-miR-16-5p	TLE4		hsa-miR-19b-3p	ZBTB4		hsa-miR-20a-5p	NEK8		hsa-miR-21-5p	TTC33		hsa-miR-221-3p	MDM2		hsa-miR-222-3p	AGO2		hsa-miR-23a-3p	CSDE1		hsa-miR-223-3p
KIF27				hsa-let-7a-5p	CDK6		hsa-miR-100-5p	RPL7A		hsa-miR-125b-5p	LIPA					hsa-miR-142-3p	SLC30A6		hsa-miR-143-3p	RAB22A		hsa-miR-144-3p	MCL1		hsa-miR-145-5p	KLF5		hsa-miR-16-5p	REL		hsa-miR-19b-3p	CCNT2		hsa-miR-20a-5p	SRCAP		hsa-miR-21-5p	KLHL15		hsa-miR-221-3p	HOXB5		hsa-miR-222-3p	TIMP3		hsa-miR-23a-3p	RPRD2		hsa-miR-223-3p
SLC19A3				hsa-let-7a-5p	TCERG1		hsa-miR-100-5p	PANK3		hsa-miR-125b-5p	GALNT18					hsa-miR-142-3p	ATF5		hsa-miR-143-3p	MYO6		hsa-miR-144-3p	KPNA2		hsa-miR-145-5p	IGFBP5		hsa-miR-16-5p	PTPRJ		hsa-miR-19b-3p	RBM20		hsa-miR-20a-5p	CCDC6		hsa-miR-21-5p	KBTBD6		hsa-miR-221-3p	BNIP3L		hsa-miR-222-3p	EXO5		hsa-miR-23a-3p	CNOT6		hsa-miR-223-3p
RAB13				hsa-let-7a-5p	CLPB		hsa-miR-100-5p	PATZ1		hsa-miR-125b-5p	RMND5A					hsa-miR-142-3p	ARL15		hsa-miR-143-3p	IL13RA1		hsa-miR-144-3p	ZNF749		hsa-miR-145-5p	TMOD3		hsa-miR-16-5p	RPS6KB1		hsa-miR-19b-3p	NR3C1		hsa-miR-20a-5p	TFAM		hsa-miR-21-5p	PPIF		hsa-miR-221-3p	ATL2		hsa-miR-222-3p	TIMP3		hsa-miR-23a-3p	SERINC3		hsa-miR-223-3p
B4GALNT3				hsa-let-7a-5p	HMGA1		hsa-miR-100-5p	UBQLN1		hsa-miR-125b-5p	TMEM2					hsa-miR-142-3p	TNIP3		hsa-miR-143-3p	MAPK7		hsa-miR-144-3p	ARL5B		hsa-miR-145-5p	MYC		hsa-miR-16-5p	TTLL12		hsa-miR-19b-3p	CAMSAP1		hsa-miR-20a-5p	KRT10		hsa-miR-21-5p	RAPGEF6		hsa-miR-221-3p	CDKN1C		hsa-miR-222-3p	CBX2		hsa-miR-23a-3p	ZNF257		hsa-miR-223-3p
ZNF200				hsa-let-7a-5p	GCN1L1		hsa-miR-100-5p	PRRC2C		hsa-miR-125b-5p	RPLP0					hsa-miR-142-3p	MORF4L2		hsa-miR-143-3p	C1orf61		hsa-miR-144-3p	ZNF350		hsa-miR-145-5p	NEDD9		hsa-miR-16-5p	L2HGDH		hsa-miR-19b-3p	FGFR1OP		hsa-miR-20a-5p	KLF10		hsa-miR-21-5p	PTEN		hsa-miR-221-3p	NUP205		hsa-miR-222-3p	GDI1		hsa-miR-23a-3p	BCAP29		hsa-miR-223-3p
TMEM64				hsa-let-7a-5p	ABT1		hsa-miR-100-5p	FKBP5		hsa-miR-125b-5p	C15orf39					hsa-miR-142-3p	BOD1		hsa-miR-143-3p	HK2		hsa-miR-144-3p	AKIRIN1		hsa-miR-145-5p	FSCN1		hsa-miR-16-5p	NAPG		hsa-miR-19b-3p	LONRF1		hsa-miR-20a-5p	RPL21		hsa-miR-21-5p	PKD2		hsa-miR-221-3p	PCDHA5		hsa-miR-222-3p	KPNB1		hsa-miR-23a-3p	POU4F2		hsa-miR-223-3p
ZC3H18				hsa-let-7a-5p	KIF27		hsa-miR-100-5p	WDR4		hsa-miR-125b-5p	ZNF385A					hsa-miR-142-3p	NR2F6		hsa-miR-143-3p	ACOT9		hsa-miR-144-3p	ZNF800		hsa-miR-145-5p	CFTR		hsa-miR-16-5p	CLIP4		hsa-miR-19b-3p	RNF11		hsa-miR-20a-5p	LAPTM4A		hsa-miR-21-5p	RPS7		hsa-miR-221-3p	ZYX		hsa-miR-222-3p	ZBTB5		hsa-miR-23a-3p	DSTN		hsa-miR-223-3p
PDZD8				hsa-let-7a-5p	SLC19A3		hsa-miR-100-5p	TAPBP		hsa-miR-125b-5p	FAM174B					hsa-miR-142-3p	SH2D1A		hsa-miR-143-3p	TFPI		hsa-miR-144-3p	PTP4A1		hsa-miR-145-5p	ETS1		hsa-miR-16-5p	PLEKHA1		hsa-miR-19b-3p	WBP2		hsa-miR-20a-5p	CTSS		hsa-miR-21-5p	TPRG1L		hsa-miR-221-3p	SLC10A7		hsa-miR-222-3p	NDC1		hsa-miR-23a-3p	VAV3
KPNA6				hsa-let-7a-5p	HMGA2		hsa-miR-100-5p	PLK1		hsa-miR-125b-5p	MCL1					hsa-miR-142-3p	TMED7		hsa-miR-143-3p	MAPK7		hsa-miR-144-3p	SPATA2		hsa-miR-145-5p	ZNF445		hsa-miR-16-5p	STX4		hsa-miR-19b-3p	DLG5		hsa-miR-20a-5p	LY6G5B		hsa-miR-21-5p	FBXO11		hsa-miR-221-3p	POU3F2		hsa-miR-222-3p	TIMP3		hsa-miR-23a-3p	CCT5
PLEKHO1				hsa-let-7a-5p	RAB13		hsa-miR-100-5p	NCOR2		hsa-miR-125b-5p	PPP1CA					hsa-miR-142-3p	KLHL15		hsa-miR-143-3p	NCKAP1		hsa-miR-144-3p	LCOR		hsa-miR-145-5p	JAG1		hsa-miR-16-5p	KIAA2013		hsa-miR-19b-3p	MRPL17		hsa-miR-20a-5p	METTL22		hsa-miR-21-5p	RPS7		hsa-miR-221-3p	ARL6IP1		hsa-miR-222-3p	GRB10		hsa-miR-23a-3p	ZNF578
PIGN				hsa-let-7a-5p	B4GALNT3		hsa-miR-100-5p	GTPBP1		hsa-miR-125b-5p	LTA4H					hsa-miR-142-3p	TIPARP		hsa-miR-143-3p	ADAMTS4		hsa-miR-144-3p	INO80D		hsa-miR-145-5p	GOLM1		hsa-miR-16-5p	HSP90AA1		hsa-miR-19b-3p	HNRNPU		hsa-miR-20a-5p	SCAMP5		hsa-miR-21-5p	BCL2		hsa-miR-221-3p	ZNF275		hsa-miR-222-3p	CDKN1B		hsa-miR-23a-3p	STARD7
NEU3				hsa-let-7a-5p	ZNF200		hsa-miR-100-5p	RAP2C		hsa-miR-125b-5p	LIN28A					hsa-miR-142-3p	CREB3L2		hsa-miR-143-3p	ZNF277		hsa-miR-144-3p	KCNQ5		hsa-miR-145-5p	SOX2		hsa-miR-16-5p	HYOU1		hsa-miR-19b-3p	TBC1D25		hsa-miR-20a-5p	ZNF780A		hsa-miR-21-5p	ZNF587		hsa-miR-221-3p	MAT2A		hsa-miR-222-3p	NSUN5		hsa-miR-23a-3p	NDUFV3
HIST2H2BF				hsa-let-7a-5p	TMEM64		hsa-miR-100-5p	CTDSPL		hsa-miR-125b-5p	THAP3					hsa-miR-142-3p	UGT2B17		hsa-miR-143-3p	RRP7A		hsa-miR-144-3p	LEFTY1		hsa-miR-145-5p	THSD7A		hsa-miR-16-5p	NUP50		hsa-miR-19b-3p	SEL1L		hsa-miR-20a-5p	PRICKLE4		hsa-miR-21-5p	PURG		hsa-miR-221-3p	NDFIP1		hsa-miR-222-3p	CDKN1B		hsa-miR-23a-3p	VCAM1
DICER1				hsa-let-7a-5p	NRAS		hsa-miR-100-5p	KDELR2		hsa-miR-125b-5p	BAK1					hsa-miR-142-3p	AGTR2		hsa-miR-143-3p	MYO6		hsa-miR-144-3p	TMTC3		hsa-miR-145-5p	UBXN2A		hsa-miR-16-5p	SEC11A		hsa-miR-19b-3p	ELMOD2		hsa-miR-20a-5p	KPNA2		hsa-miR-21-5p	LRRC57		hsa-miR-221-3p	AP3B1		hsa-miR-222-3p	CDKN1C		hsa-miR-23a-3p	LDHA
CCNB2				hsa-let-7a-5p	ZC3H18		hsa-miR-100-5p	QKI		hsa-miR-125b-5p	RAF1					hsa-miR-142-3p	ECT2		hsa-miR-143-3p	KRAS		hsa-miR-144-3p	NUS1		hsa-miR-145-5p	PPM1D		hsa-miR-16-5p	ATP6V0E1		hsa-miR-19b-3p	NUP54		hsa-miR-20a-5p	MKRN1		hsa-miR-21-5p	PDCD4		hsa-miR-221-3p	ZNF805		hsa-miR-222-3p	PIGQ		hsa-miR-23a-3p	MCFD2
NME4				hsa-let-7a-5p	PDZD8		hsa-miR-100-5p	LIX1L		hsa-miR-125b-5p	C19orf54					hsa-miR-142-3p	CTNNB1		hsa-miR-143-3p	SECISBP2L		hsa-miR-144-3p	SMARCA5		hsa-miR-145-5p	KREMEN1		hsa-miR-16-5p	FZD6		hsa-miR-19b-3p	KITLG		hsa-miR-20a-5p	LRRD1		hsa-miR-21-5p	TRIM2		hsa-miR-221-3p	FICD		hsa-miR-222-3p	MTA2		hsa-miR-23a-3p	USP5
LRIG3				hsa-let-7a-5p	KPNA6		hsa-miR-100-5p	RPL7		hsa-miR-125b-5p	RRP7A					hsa-miR-142-3p	PSME4		hsa-miR-143-3p	HK2		hsa-miR-144-3p	INO80D		hsa-miR-145-5p	PSAT1		hsa-miR-16-5p	RAB1A		hsa-miR-19b-3p	SLC46A1		hsa-miR-20a-5p	C6orf120		hsa-miR-21-5p	EIF1AX		hsa-miR-221-3p	TMEM132B		hsa-miR-222-3p	PEBP1		hsa-miR-23a-3p	ACSS3
IGF2BP3				hsa-let-7a-5p	PLEKHO1		hsa-miR-100-5p	RPL19		hsa-miR-125b-5p	CCNE1					hsa-miR-142-3p	TOR1AIP2		hsa-miR-143-3p	IER5		hsa-miR-144-3p	ZNF480		hsa-miR-145-5p	FSCN1		hsa-miR-16-5p	MED13		hsa-miR-19b-3p	SPG20		hsa-miR-20a-5p	SSH2		hsa-miR-21-5p	C2orf43		hsa-miR-221-3p	CHCHD2		hsa-miR-222-3p	OBFC1		hsa-miR-23a-3p	PTGFRN
SNRPC				hsa-let-7a-5p	PIGN		hsa-miR-100-5p	MTOR		hsa-miR-125b-5p	TP53INP1					hsa-miR-142-3p	FAM208B		hsa-miR-143-3p	TTC38		hsa-miR-144-3p	CCNK		hsa-miR-145-5p	ZNF678		hsa-miR-16-5p	RFT1		hsa-miR-19b-3p	GRB10		hsa-miR-20a-5p	SKI		hsa-miR-21-5p	SERAC1		hsa-miR-221-3p	CHORDC1		hsa-miR-222-3p	ZNF708		hsa-miR-23a-3p	NUP153
KIAA1328				hsa-let-7a-5p	NEU3		hsa-miR-100-5p	MAPK1IP1L		hsa-miR-125b-5p	C1orf109					hsa-miR-142-3p	PARP2		hsa-miR-143-3p	ZBTB44		hsa-miR-144-3p	CHAC1		hsa-miR-145-5p	ILK		hsa-miR-16-5p	TNK1		hsa-miR-19b-3p	SMAD4		hsa-miR-20a-5p	KLHL28		hsa-miR-21-5p	PDCD4		hsa-miR-221-3p	CROT		hsa-miR-222-3p	IPP		hsa-miR-23a-3p	ZNF426
BZW1				hsa-let-7a-5p	CLDN12		hsa-miR-100-5p	RB1		hsa-miR-125b-5p	GSS					hsa-miR-142-3p	CDC14B		hsa-miR-143-3p	DNMT3A		hsa-miR-144-3p	DAB2		hsa-miR-145-5p	SOX9		hsa-miR-16-5p	L2HGDH		hsa-miR-19b-3p	KLHL42		hsa-miR-20a-5p	F3		hsa-miR-21-5p	ETNK1		hsa-miR-221-3p	DDX6		hsa-miR-222-3p	ESR1		hsa-miR-23a-3p	ETNK1
UBAP2				hsa-let-7a-5p	COIL		hsa-miR-100-5p	CUL1		hsa-miR-125b-5p	GANAB					hsa-miR-142-3p	GOLGA1		hsa-miR-143-3p	LIMK1		hsa-miR-144-3p	FAM217B		hsa-miR-145-5p	PRDM2		hsa-miR-16-5p	CDC27		hsa-miR-19b-3p	TBRG1		hsa-miR-20a-5p	GATA6		hsa-miR-21-5p	CLU		hsa-miR-221-3p	RB1		hsa-miR-222-3p	CAST		hsa-miR-23a-3p	ZNF701
TMED5				hsa-let-7a-5p	WASL		hsa-miR-100-5p	BCL10		hsa-miR-125b-5p	FGFR2					hsa-miR-142-3p	SECISBP2		hsa-miR-143-3p	BCL2		hsa-miR-144-3p	ZCCHC2		hsa-miR-145-5p	UTP15		hsa-miR-16-5p	CDCA4		hsa-miR-19b-3p	STX16		hsa-miR-20a-5p	ARFGEF2		hsa-miR-21-5p	MSH2		hsa-miR-221-3p	KIT		hsa-miR-222-3p	TXN		hsa-miR-23a-3p	APAF1
FOXA1				hsa-let-7a-5p	HIST2H2BF		hsa-miR-100-5p	ACTB		hsa-miR-125b-5p	EEF1A1					hsa-miR-142-3p	TROVE2		hsa-miR-143-3p	PLEKHA1		hsa-miR-144-3p	ANKRD11		hsa-miR-145-5p	SOX11		hsa-miR-16-5p	DDX21		hsa-miR-19b-3p	RAPGEF6		hsa-miR-20a-5p	KIAA1551		hsa-miR-21-5p	MALT1		hsa-miR-221-3p	YOD1		hsa-miR-222-3p	ABLIM1		hsa-miR-23a-3p	ZNF550
AHR				hsa-let-7a-5p	DICER1		hsa-miR-100-5p	EDEM1		hsa-miR-125b-5p	TMEM136					hsa-miR-142-3p	ESR1		hsa-miR-143-3p	NAPEPLD		hsa-miR-144-3p	NFE2L2		hsa-miR-145-5p	KLF4		hsa-miR-16-5p	UBN2		hsa-miR-19b-3p	MID1IP1		hsa-miR-20a-5p	ARHGAP12		hsa-miR-21-5p	RHOB		hsa-miR-221-3p	AGO2		hsa-miR-222-3p	FASN		hsa-miR-23a-3p	ZNF485
KDM6B				hsa-let-7a-5p	ACOT9		hsa-miR-100-5p	ANAPC1		hsa-miR-125b-5p	GSS					hsa-miR-142-3p	ZNF264		hsa-miR-143-3p	XIAP		hsa-miR-144-3p	C2orf44		hsa-miR-145-5p	MUC1		hsa-miR-16-5p	HNRNPDL		hsa-miR-19b-3p	POLI		hsa-miR-20a-5p	TIMM17A		hsa-miR-21-5p	PDCD4		hsa-miR-221-3p	XRCC6		hsa-miR-222-3p	FUBP1		hsa-miR-23a-3p	HMGN2
AURKB				hsa-let-7a-5p	CCNB2		hsa-miR-100-5p	C21orf91		hsa-miR-125b-5p	SPEN					hsa-miR-142-3p	ZNF460		hsa-miR-143-3p	MAPK7		hsa-miR-144-3p	CLIC4		hsa-miR-145-5p	ZBTB25		hsa-miR-16-5p	SSRP1		hsa-miR-19b-3p	DCUN1D3		hsa-miR-20a-5p	CAPRIN2		hsa-miR-21-5p	SESTD1		hsa-miR-221-3p	TIMP3		hsa-miR-222-3p	ZNF652		hsa-miR-23a-3p	PEX26
SLC10A7				hsa-let-7a-5p	NME4		hsa-miR-100-5p	HIST2H4B		hsa-miR-125b-5p	COX7C					hsa-miR-142-3p	CPS1		hsa-miR-143-3p	MAPK7		hsa-miR-144-3p	CMTM6		hsa-miR-145-5p	ADAM17		hsa-miR-16-5p	DCAF13		hsa-miR-19b-3p	KLHL11		hsa-miR-20a-5p	STX4		hsa-miR-21-5p	PTEN		hsa-miR-221-3p	EXO5		hsa-miR-222-3p	MKKS		hsa-miR-23a-3p	ZIK1
SAMD4B				hsa-let-7a-5p	LRIG3		hsa-miR-100-5p	MORF4L2		hsa-miR-125b-5p	C1D					hsa-miR-142-3p	FAM177A1		hsa-miR-143-3p	FGD6		hsa-miR-144-3p	RBM8A		hsa-miR-145-5p	EIF4E		hsa-miR-16-5p	SLC35B2		hsa-miR-19b-3p	MECP2		hsa-miR-20a-5p	CDT1		hsa-miR-21-5p	PLEKHA8		hsa-miR-221-3p	TIMP3		hsa-miR-222-3p	BBC3		hsa-miR-23a-3p	HES1
TSC22D2				hsa-let-7a-5p	IGF2BP3		hsa-miR-100-5p	GNA13		hsa-miR-125b-5p	GJB7					hsa-miR-142-3p	VSIG1		hsa-miR-143-3p	CREG2		hsa-miR-144-3p	TGFBR3		hsa-miR-145-5p	MUC4		hsa-miR-16-5p	FGFR1		hsa-miR-19b-3p	COX10		hsa-miR-20a-5p	NFAT5		hsa-miR-21-5p	ARHGEF12		hsa-miR-221-3p	NR2C2AP		hsa-miR-222-3p	YY1AP1		hsa-miR-23a-3p	ZNF268
RBMXL1				hsa-let-7a-5p	SNRPC		hsa-miR-100-5p	SF3B3		hsa-miR-125b-5p	SMC2					hsa-miR-142-3p	IRF1		hsa-miR-143-3p	MAPK7		hsa-miR-144-3p	HOXA10		hsa-miR-145-5p	SRGAP1		hsa-miR-16-5p	DMPK		hsa-miR-19b-3p	ITPR1		hsa-miR-20a-5p	PPP1R15B		hsa-miR-21-5p	CDK2AP1		hsa-miR-221-3p	ACIN1		hsa-miR-222-3p	EXOC8		hsa-miR-23a-3p	TMED7
C12orf4				hsa-let-7a-5p	KIAA1328		hsa-miR-100-5p	MRPS33		hsa-miR-125b-5p	MTRF1L					hsa-miR-142-3p	SLC35F5		hsa-miR-143-3p	STOX2		hsa-miR-144-3p	MORC3		hsa-miR-145-5p	CDK6		hsa-miR-16-5p	CCNT1		hsa-miR-19b-3p	KPNA6		hsa-miR-20a-5p	PRKCB		hsa-miR-21-5p	ZADH2		hsa-miR-221-3p	CAMKK1		hsa-miR-222-3p	NGRN		hsa-miR-23a-3p	SCAMP2
YOD1				hsa-let-7a-5p	BZW1		hsa-miR-100-5p	PAPSS1		hsa-miR-125b-5p	CHPF2					hsa-miR-142-3p	UCK2		hsa-miR-143-3p	HK2		hsa-miR-144-3p	FNDC3A		hsa-miR-145-5p	MUC1		hsa-miR-16-5p	ARHGDIA		hsa-miR-19b-3p	SERINC3		hsa-miR-20a-5p	LLPH		hsa-miR-21-5p	SIRT2		hsa-miR-221-3p	UTP14A		hsa-miR-222-3p	CDKN1B		hsa-miR-23a-3p	STAMBPL1
INTS7				hsa-let-7a-5p	UBAP2		hsa-miR-100-5p	SEPSECS		hsa-miR-125b-5p	VPS4B					hsa-miR-142-3p	C9orf72		hsa-miR-143-3p	RPS19		hsa-miR-144-3p	PPP6C		hsa-miR-145-5p	SWAP70		hsa-miR-16-5p	CHMP4B		hsa-miR-19b-3p	MIER1		hsa-miR-20a-5p	EIF2S1		hsa-miR-21-5p	PTEN		hsa-miR-221-3p	RECK		hsa-miR-222-3p	CSTF2T		hsa-miR-23a-3p	PTEN
GBF1				hsa-let-7a-5p	TMED5		hsa-miR-100-5p	QSER1		hsa-miR-125b-5p	VDR					hsa-miR-142-3p	NR2C1		hsa-miR-143-3p	BBC3		hsa-miR-144-3p	SLC35F5		hsa-miR-145-5p	CCDC43		hsa-miR-16-5p	RAB21		hsa-miR-19b-3p	MPRIP		hsa-miR-20a-5p	KIF23		hsa-miR-21-5p	CASC5		hsa-miR-221-3p	ZBTB5		hsa-miR-222-3p	IPO5		hsa-miR-23a-3p	SERINC3
NSD1				hsa-let-7a-5p	FOXA1		hsa-miR-100-5p	ORMDL1		hsa-miR-125b-5p	SEMA4C					hsa-miR-142-3p	MROH7		hsa-miR-143-3p	COMMD2		hsa-miR-144-3p	APPBP2		hsa-miR-145-5p	POU5F1		hsa-miR-16-5p	LY6K		hsa-miR-19b-3p	SMOC1		hsa-miR-20a-5p	HS3ST1		hsa-miR-21-5p	PDCD4		hsa-miR-221-3p	TBK1		hsa-miR-222-3p	DERL2		hsa-miR-23a-3p	FBN2
DEGS1				hsa-let-7a-5p	IKZF3		hsa-miR-100-5p	ALG3		hsa-miR-125b-5p	PTGES					hsa-miR-142-3p	IFNAR2		hsa-miR-143-3p	UBE2V2		hsa-miR-144-3p	EIF5A2		hsa-miR-145-5p	IFNB1		hsa-miR-16-5p	KATNAL1		hsa-miR-19b-3p	ACVR1		hsa-miR-20a-5p	GBF1		hsa-miR-21-5p	REV3L		hsa-miR-221-3p	KPNA2		hsa-miR-222-3p	PPM1H		hsa-miR-23a-3p	CCL8
MLLT10				hsa-let-7a-5p	KRAS		hsa-miR-100-5p	HOXA1		hsa-miR-125b-5p	IL6R					hsa-miR-142-3p	TMEM59		hsa-miR-143-3p	TUBB2A		hsa-miR-144-3p	ZNF800		hsa-miR-145-5p	MMP14		hsa-miR-16-5p	DNAJA1		hsa-miR-19b-3p	ADIPOR2		hsa-miR-20a-5p	HIF1A		hsa-miR-21-5p	GXYLT2		hsa-miR-221-3p	TIMP3		hsa-miR-222-3p	SV2A		hsa-miR-23a-3p	ZNF485
IVD				hsa-let-7a-5p	AHR		hsa-miR-100-5p	NTAN1		hsa-miR-125b-5p	PRKRA					hsa-miR-142-3p	CBY1		hsa-miR-143-3p	MAPK1		hsa-miR-144-3p	SIX4		hsa-miR-145-5p	IGF1R		hsa-miR-16-5p	MSL1		hsa-miR-19b-3p	DUT		hsa-miR-20a-5p	PEAK1		hsa-miR-21-5p	CDC25A		hsa-miR-221-3p	CDKN1B		hsa-miR-222-3p	SERTAD4		hsa-miR-23a-3p	ZNF138
MYC				hsa-let-7a-5p	BZW1		hsa-miR-100-5p	SLMO2		hsa-miR-125b-5p	B4GALT3					hsa-miR-142-3p	AK4		hsa-miR-143-3p	COL1A1		hsa-miR-144-3p	ELL2		hsa-miR-145-5p	HDAC11		hsa-miR-16-5p	HDGF		hsa-miR-19b-3p	WDFY2		hsa-miR-20a-5p	CMPK1		hsa-miR-21-5p	RAB6A		hsa-miR-221-3p	DENR		hsa-miR-222-3p	POMGNT1		hsa-miR-23a-3p	ZNF578
ZNF28				hsa-let-7a-5p	KDM6B		hsa-miR-100-5p	RCN2		hsa-miR-125b-5p	WDR11					hsa-miR-142-3p	ZFP36L2		hsa-miR-143-3p	SYT7		hsa-miR-144-3p	EIF2S3		hsa-miR-145-5p	ADD3		hsa-miR-16-5p	XPO1		hsa-miR-19b-3p	FBXO28		hsa-miR-20a-5p	ARHGAP1		hsa-miR-21-5p	SEPT2		hsa-miR-221-3p	FOS		hsa-miR-222-3p	NSMF		hsa-miR-23a-3p	GGA3
SMG7				hsa-let-7a-5p	AURKB		hsa-miR-100-5p	VCP		hsa-miR-125b-5p	TOR2A					hsa-miR-142-3p	SLC25A13		hsa-miR-143-3p	COL1A1		hsa-miR-144-3p	YOD1		hsa-miR-145-5p	IRS1		hsa-miR-16-5p	BCL2		hsa-miR-19b-3p	PGM2L1		hsa-miR-20a-5p	CNOT6L		hsa-miR-21-5p	RTN4		hsa-miR-221-3p	PDGFA		hsa-miR-222-3p	CCDC47		hsa-miR-23a-3p	POM121C
ONECUT2				hsa-let-7a-5p	SLC10A7		hsa-miR-100-5p	RLIM		hsa-miR-125b-5p	BCL3					hsa-miR-142-3p	INSIG2		hsa-miR-143-3p	CERS4		hsa-miR-144-3p	STX16		hsa-miR-145-5p	SMAD3		hsa-miR-16-5p	LYRM5		hsa-miR-19b-3p	FBXO8		hsa-miR-20a-5p	CAPN15		hsa-miR-21-5p	TPRG1L		hsa-miR-221-3p	KLHL8		hsa-miR-222-3p	BCL2L11		hsa-miR-23a-3p	SERINC3
USP14				hsa-let-7a-5p	SAMD4B		hsa-miR-100-5p	JPH1		hsa-miR-125b-5p	RIMS4					hsa-miR-142-3p	SLC35F6		hsa-miR-143-3p	CSRNP2		hsa-miR-144-3p	MMS22L		hsa-miR-145-5p	MYO6		hsa-miR-16-5p	NARF		hsa-miR-19b-3p	PHLDA3		hsa-miR-20a-5p	WAC		hsa-miR-21-5p	PTK2		hsa-miR-221-3p	HOXC10		hsa-miR-222-3p	RAP1GAP2		hsa-miR-23a-3p	SDHD
FNDC3A				hsa-let-7a-5p	TSC22D2		hsa-miR-100-5p	NDUFA9		hsa-miR-125b-5p	SEMA4C					hsa-miR-142-3p	SMG1		hsa-miR-143-3p	BBC3		hsa-miR-144-3p	PTEN		hsa-miR-145-5p	CTNNBIP1		hsa-miR-16-5p	ZNF460		hsa-miR-19b-3p	THOP1		hsa-miR-20a-5p	METTL21D		hsa-miR-21-5p	PDCD4		hsa-miR-221-3p	MDM2		hsa-miR-222-3p	BPTF		hsa-miR-23a-3p	HIVEP1
EXPH5				hsa-let-7a-5p	RBMXL1		hsa-miR-100-5p	IARS		hsa-miR-125b-5p	GOLGA8A					hsa-miR-142-3p	CNN3		hsa-miR-143-3p	CCR6		hsa-miR-144-3p	ZNF800		hsa-miR-145-5p	SOX2		hsa-miR-16-5p	CAMK2G		hsa-miR-19b-3p	DLG5		hsa-miR-20a-5p	C14orf105		hsa-miR-21-5p	RPS7		hsa-miR-221-3p	OBFC1		hsa-miR-222-3p	MAT2A		hsa-miR-23a-3p	BAZ2A
ANKRD46				hsa-let-7a-5p	C12orf4		hsa-miR-100-5p	SMPDL3B		hsa-miR-125b-5p	RPS12					hsa-miR-142-3p	ZNF678		hsa-miR-143-3p	SGPL1		hsa-miR-144-3p	NEURL1B		hsa-miR-145-5p	IRS1		hsa-miR-16-5p	RNF149		hsa-miR-19b-3p	CCNA2		hsa-miR-20a-5p	XYLT2		hsa-miR-21-5p	PDCD4		hsa-miR-221-3p	TIPARP		hsa-miR-222-3p	CSNK1G1		hsa-miR-23a-3p	RPS5
FAM105B				hsa-let-7a-5p	YOD1		hsa-miR-100-5p	PAFAH1B1		hsa-miR-125b-5p	MTMR3					hsa-miR-142-3p	SERPINA4		hsa-miR-143-3p	BCL2		hsa-miR-144-3p	ANKRD11		hsa-miR-145-5p	ACTB		hsa-miR-16-5p	UBE2C		hsa-miR-19b-3p	WNT10A		hsa-miR-20a-5p	SOX4		hsa-miR-21-5p	SLC26A2		hsa-miR-221-3p	DDIT4		hsa-miR-222-3p	SLC25A36		hsa-miR-23a-3p	HOXB4
MIEF1				hsa-let-7a-5p	INTS7		hsa-miR-100-5p	COX5A		hsa-miR-125b-5p	SLC35A4					hsa-miR-142-3p	TUBAL3		hsa-miR-143-3p	HK2		hsa-miR-144-3p	FKBP14		hsa-miR-145-5p	CDK4		hsa-miR-16-5p	RARS		hsa-miR-19b-3p	KIF13A		hsa-miR-20a-5p	E2F1		hsa-miR-21-5p	SECISBP2L		hsa-miR-221-3p	EVL		hsa-miR-222-3p	KMT2D		hsa-miR-23a-3p	ZNF319
C7orf60				hsa-let-7a-5p	C5orf51		hsa-miR-100-5p	FAM221A		hsa-miR-125b-5p	KPNB1					hsa-miR-142-3p	COPG1		hsa-miR-143-3p	RPS27		hsa-miR-144-3p	POU2F1		hsa-miR-145-5p	ZNF660		hsa-miR-16-5p	NOP10		hsa-miR-19b-3p	MBNL1		hsa-miR-20a-5p	CAV1		hsa-miR-21-5p	SPPL3		hsa-miR-221-3p	ABLIM1		hsa-miR-222-3p	PHACTR4		hsa-miR-23a-3p	POM121C
ACTA1				hsa-let-7a-5p	GBF1		hsa-miR-100-5p	GDE1		hsa-miR-125b-5p	NUP93					hsa-miR-142-3p	BTBD7		hsa-miR-143-3p	KRAS		hsa-miR-144-3p	SPAG1		hsa-miR-145-5p	ESR1		hsa-miR-16-5p	RELT		hsa-miR-19b-3p	ZFAND5		hsa-miR-20a-5p	HAUS8		hsa-miR-21-5p	UTRN		hsa-miR-221-3p	SRSF2		hsa-miR-222-3p	NCAPD2		hsa-miR-23a-3p	UQCRFS1
HOXA6				hsa-let-7a-5p	NSD1		hsa-miR-100-5p	FXN		hsa-miR-125b-5p	PCDHGB2					hsa-miR-142-3p	TBC1D13		hsa-miR-143-3p	MAPK1		hsa-miR-144-3p	RPL7L1		hsa-miR-145-5p	ALG9		hsa-miR-16-5p	CDC37		hsa-miR-19b-3p	SMG1		hsa-miR-20a-5p	RNF115		hsa-miR-21-5p	KAT6A		hsa-miR-221-3p	CCSAP		hsa-miR-222-3p	SSX2IP		hsa-miR-23a-3p	ZNF257
IFNLR1				hsa-let-7a-5p	DEGS1		hsa-miR-100-5p	IGF1R		hsa-miR-125b-5p	CDKN2A					hsa-miR-142-3p	GNB2		hsa-miR-143-3p	PPP2R5E		hsa-miR-144-3p	PLS1		hsa-miR-145-5p	F11R		hsa-miR-16-5p	MLLT11		hsa-miR-19b-3p	ZNF680		hsa-miR-20a-5p	RFXANK		hsa-miR-21-5p	SESN1		hsa-miR-221-3p	CDKN1B		hsa-miR-222-3p	SLC25A10		hsa-miR-23a-3p	CRLS1
UBAP2L				hsa-let-7a-5p	MLLT10		hsa-miR-100-5p	CYR61		hsa-miR-125b-5p	IKZF2					hsa-miR-142-3p	KIAA1191		hsa-miR-143-3p	MAPK7		hsa-miR-144-3p	ZC3H11A		hsa-miR-145-5p	ZNF772		hsa-miR-16-5p	PGLYRP1		hsa-miR-19b-3p	CREBL2		hsa-miR-20a-5p	AGMAT		hsa-miR-21-5p	PHF20L1		hsa-miR-221-3p	ACTB		hsa-miR-222-3p	ACTB		hsa-miR-23a-3p	PTEN
CEP170B				hsa-let-7a-5p	IVD		hsa-miR-100-5p	HOXA1		hsa-miR-125b-5p	FBXO38					hsa-miR-142-3p	CA5B		hsa-miR-143-3p	PLEKHM3		hsa-miR-144-3p	BCL2L11		hsa-miR-145-5p	POU5F1		hsa-miR-16-5p	PDIK1L		hsa-miR-19b-3p	AGO3		hsa-miR-20a-5p	MINK1		hsa-miR-21-5p	AUTS2		hsa-miR-221-3p	CDKN1B		hsa-miR-222-3p	HSPA14		hsa-miR-23a-3p	VAV3
ZNF799				hsa-let-7a-5p	MYC		hsa-miR-100-5p	PNRC1		hsa-miR-125b-5p	NSUN2					hsa-miR-142-3p	FRS2		hsa-miR-143-3p	TAF1D		hsa-miR-144-3p	HNRNPF		hsa-miR-145-5p	MMP1		hsa-miR-16-5p	UBE2H		hsa-miR-19b-3p	DDX6		hsa-miR-20a-5p	MKNK2		hsa-miR-21-5p	AGO2		hsa-miR-221-3p	APAF1		hsa-miR-222-3p	PSMC4		hsa-miR-23a-3p	ATXN7L3B
SMC1A				hsa-let-7a-5p	CLDN12		hsa-miR-100-5p	PTPN9		hsa-miR-125b-5p	BACE2					hsa-miR-142-3p	PSMB5		hsa-miR-143-3p	RREB1		hsa-miR-144-3p	BCL2L2-PABPN1		hsa-miR-145-5p	NANOG		hsa-miR-16-5p	NUFIP2		hsa-miR-19b-3p	ZBTB47		hsa-miR-20a-5p	ZNF180		hsa-miR-21-5p	TNRC6B		hsa-miR-221-3p	CDC25C		hsa-miR-222-3p	GDI2		hsa-miR-23a-3p	PSMC3
SFSWAP				hsa-let-7a-5p	ZNF28		hsa-miR-100-5p	ACTR1B		hsa-miR-125b-5p	LIN28A					hsa-miR-142-3p	RAC1		hsa-miR-143-3p	PPIL4		hsa-miR-144-3p	NUS1		hsa-miR-145-5p	CYP2C19		hsa-miR-16-5p	EEF2		hsa-miR-19b-3p	RAP1A		hsa-miR-20a-5p	DCTN6		hsa-miR-21-5p	FRS2		hsa-miR-221-3p	FSCN1		hsa-miR-222-3p	RFC1		hsa-miR-23a-3p	ZNF208
GGPS1				hsa-let-7a-5p	SMG7		hsa-miR-100-5p	PLK1		hsa-miR-125b-5p	ZSWIM6					hsa-miR-142-3p	EEF2K		hsa-miR-143-3p	FNDC3B		hsa-miR-144-3p	TNPO1		hsa-miR-145-5p	ABRACL		hsa-miR-16-5p	HELZ		hsa-miR-19b-3p	WBP1L		hsa-miR-20a-5p	RPA2		hsa-miR-21-5p	MTPN		hsa-miR-221-3p	DERL2		hsa-miR-222-3p	PELI2		hsa-miR-23a-3p	TBL2
LARP1				hsa-let-7a-5p	ONECUT2		hsa-miR-100-5p	H2AFY		hsa-miR-125b-5p	IRF4					hsa-miR-142-3p	TAOK1		hsa-miR-143-3p	HRAS		hsa-miR-144-3p	ATXN1L		hsa-miR-145-5p	MAP3K3		hsa-miR-16-5p	VAV2		hsa-miR-19b-3p	CCDC137		hsa-miR-20a-5p	KRT10		hsa-miR-21-5p	SET		hsa-miR-221-3p	PTEN		hsa-miR-222-3p	MDM2		hsa-miR-23a-3p	IL6R
GABPB1				hsa-let-7a-5p	USP14		hsa-miR-100-5p	ATP2A2		hsa-miR-125b-5p	EXTL3					hsa-miR-142-3p	C16orf70		hsa-miR-143-3p	BTF3L4		hsa-miR-144-3p	FGG		hsa-miR-145-5p	SMIM17		hsa-miR-16-5p	HERC6		hsa-miR-19b-3p	NAPB		hsa-miR-20a-5p	CASP2		hsa-miR-21-5p	PTAR1		hsa-miR-221-3p	APOL2		hsa-miR-222-3p	C11orf57		hsa-miR-23a-3p	ATP5A1
SPATS2				hsa-let-7a-5p	FNDC3A		hsa-miR-100-5p	MARC1		hsa-miR-125b-5p	SPHAR					hsa-miR-142-3p	ZNF682		hsa-miR-143-3p	YWHAB		hsa-miR-144-3p	AKIRIN1		hsa-miR-145-5p	TGFBR2		hsa-miR-16-5p	AHCYL2		hsa-miR-19b-3p	PRUNE2		hsa-miR-20a-5p	LAPTM4A		hsa-miR-21-5p	PDCD4		hsa-miR-221-3p	BAG3		hsa-miR-222-3p	ARHGAP42		hsa-miR-23a-3p	FUT4
ZNF460				hsa-let-7a-5p	EXPH5		hsa-miR-100-5p	CTDSPL2		hsa-miR-125b-5p	EXOC7					hsa-miR-142-3p	ETNK2		hsa-miR-143-3p	BCL2		hsa-miR-144-3p	RAC1		hsa-miR-145-5p	ACTB		hsa-miR-16-5p	TRIM44		hsa-miR-19b-3p	CENPN		hsa-miR-20a-5p	ACSL4		hsa-miR-21-5p	ZNF460		hsa-miR-221-3p	ERBB4		hsa-miR-222-3p	KPNA2		hsa-miR-23a-3p	ZNF257
ESPL1				hsa-let-7a-5p	ANKRD46		hsa-miR-100-5p	RHPN2		hsa-miR-125b-5p	MEPCE					hsa-miR-142-3p	KAT2B		hsa-miR-143-3p	GXYLT1		hsa-miR-144-3p	LYSMD3		hsa-miR-145-5p	SMAD5		hsa-miR-16-5p	PNPLA6		hsa-miR-19b-3p	TNIP1		hsa-miR-20a-5p	ARHGAP1		hsa-miR-21-5p	NIN		hsa-miR-221-3p	B4GALT2		hsa-miR-222-3p	CAPRIN1		hsa-miR-23a-3p	USP34
NR1I2				hsa-let-7a-5p	FAM105B		hsa-miR-100-5p	RPL7L1		hsa-miR-125b-5p	PIP4K2C					hsa-miR-142-3p	MGLL		hsa-miR-143-3p	MIER3		hsa-miR-144-3p	RAC1		hsa-miR-145-5p	KLF4		hsa-miR-16-5p	PRKAA1		hsa-miR-19b-3p	C5orf51		hsa-miR-20a-5p	RPL18A		hsa-miR-21-5p	SCRN1		hsa-miR-221-3p	PTEN		hsa-miR-222-3p	PGPEP1		hsa-miR-23a-3p	ADAM28
FAM222B				hsa-let-7a-5p	MIEF1		hsa-miR-100-5p	PCBP1		hsa-miR-125b-5p	VPS51					hsa-miR-142-3p	WHAMM		hsa-miR-143-3p	MAPK7		hsa-miR-144-3p	NOTCH1		hsa-miR-145-5p	IRS1		hsa-miR-16-5p	BCCIP		hsa-miR-19b-3p	DDX3X		hsa-miR-20a-5p	ARHGAP35		hsa-miR-21-5p	CORO2A		hsa-miR-221-3p	ZBTB37		hsa-miR-222-3p	FOXO3		hsa-miR-23a-3p	KLF10
NOM1				hsa-let-7a-5p	C7orf60		hsa-miR-100-5p	RAB33B		hsa-miR-125b-5p	CD320					hsa-miR-142-3p	IP6K1		hsa-miR-143-3p	XIAP		hsa-miR-144-3p	ACSL4		hsa-miR-145-5p	SP1		hsa-miR-16-5p	CHERP		hsa-miR-19b-3p	SPATA2		hsa-miR-20a-5p	LZIC		hsa-miR-21-5p	BTN3A3		hsa-miR-221-3p	MYBL1		hsa-miR-222-3p	OSBPL10		hsa-miR-23a-3p	DCP2
RABL2B				hsa-let-7a-5p	ACTA1		hsa-miR-100-5p	EIF5A		hsa-miR-125b-5p	LONRF2					hsa-miR-142-3p	TAS2R7		hsa-miR-143-3p	RBM27		hsa-miR-144-3p	CCT2		hsa-miR-145-5p	TSPAN6		hsa-miR-16-5p	MYB		hsa-miR-19b-3p	TMOD3		hsa-miR-20a-5p	NR2F6		hsa-miR-21-5p	AIM1		hsa-miR-221-3p	TSPAN13		hsa-miR-222-3p	KIT		hsa-miR-23a-3p	DOCK4
NAP1L1				hsa-let-7a-5p	HOXA6		hsa-miR-100-5p	TEX264		hsa-miR-125b-5p	EIF4EBP1					hsa-miR-142-3p	ELL2		hsa-miR-143-3p	CASP5		hsa-miR-144-3p	PHF3		hsa-miR-145-5p	HOXA9		hsa-miR-16-5p	PAK1IP1		hsa-miR-19b-3p	LZIC		hsa-miR-20a-5p	E2F1		hsa-miR-21-5p	DUSP8		hsa-miR-221-3p	PPP6C		hsa-miR-222-3p	PPP6C		hsa-miR-23a-3p	VAV3
SLC11A2				hsa-let-7a-5p	IFNLR1		hsa-miR-100-5p	CAMKK2		hsa-miR-125b-5p	LIN28A					hsa-miR-142-3p	RNF170		hsa-miR-143-3p	RPS27		hsa-miR-144-3p	SGPL1		hsa-miR-145-5p	MYC		hsa-miR-16-5p	STK38		hsa-miR-19b-3p	CBY1		hsa-miR-20a-5p	ITGA2		hsa-miR-21-5p	GP5		hsa-miR-221-3p	E2F3		hsa-miR-222-3p	FOS		hsa-miR-23a-3p	SLC27A4
AHCYL2				hsa-let-7a-5p	UBAP2L		hsa-miR-100-5p	AP3M1		hsa-miR-125b-5p	E2F2					hsa-miR-142-3p	CPEB2		hsa-miR-143-3p	ENO4		hsa-miR-144-3p	PABPN1		hsa-miR-145-5p	PSAT1		hsa-miR-16-5p	RAB15		hsa-miR-19b-3p	FAT3		hsa-miR-20a-5p	NABP1		hsa-miR-21-5p	LONRF2		hsa-miR-221-3p	ACTG1		hsa-miR-222-3p	CDKN1B		hsa-miR-23a-3p	ZNF275
KREMEN1				hsa-let-7a-5p	CEP170B		hsa-miR-100-5p	CREBBP		hsa-miR-125b-5p	MTMR12					hsa-miR-142-3p	PAPD7		hsa-miR-143-3p	MYCBP		hsa-miR-144-3p	ZFP36L2		hsa-miR-145-5p	FSCN1		hsa-miR-16-5p	GALNT1		hsa-miR-19b-3p	BRD9		hsa-miR-20a-5p	CMTR2		hsa-miR-21-5p	PTEN		hsa-miR-221-3p	CDKN1B		hsa-miR-222-3p	FLNA		hsa-miR-23a-3p	ZNF669
AGO2				hsa-let-7a-5p	ZNF799		hsa-miR-100-5p	PLK1		hsa-miR-125b-5p	PDZD11					hsa-miR-142-3p	PHF12		hsa-miR-143-3p	ZNF573		hsa-miR-144-3p	FGA		hsa-miR-145-5p	ARL6IP5		hsa-miR-16-5p	SARS		hsa-miR-19b-3p	ELOVL5		hsa-miR-20a-5p	DNAJB4		hsa-miR-21-5p	UQCRB		hsa-miR-221-3p	SOX11		hsa-miR-222-3p	DBN1		hsa-miR-23a-3p	RNF111
SUMO1				hsa-let-7a-5p	SMC1A		hsa-miR-100-5p	ALDH9A1		hsa-miR-125b-5p	E2F3					hsa-miR-142-3p	BRMS1L		hsa-miR-143-3p	MAP3K7		hsa-miR-144-3p	PLAG1		hsa-miR-145-5p	SMAD3		hsa-miR-16-5p	SART1		hsa-miR-19b-3p	UBN2		hsa-miR-20a-5p	CCND1		hsa-miR-21-5p	SGCB		hsa-miR-221-3p	TLE4		hsa-miR-222-3p	SART1		hsa-miR-23a-3p	TCF25
ASPM				hsa-let-7a-5p	MYC		hsa-miR-100-5p	KPNA2		hsa-miR-125b-5p	KIAA0141					hsa-miR-142-3p	STRBP		hsa-miR-143-3p	RPS27		hsa-miR-144-3p	FAM69A		hsa-miR-145-5p	TPM3		hsa-miR-16-5p	TM7SF3		hsa-miR-19b-3p	SYBU		hsa-miR-20a-5p	PSMD2		hsa-miR-21-5p	PTEN		hsa-miR-221-3p	MEOX2		hsa-miR-222-3p	KITLG		hsa-miR-23a-3p	PTEN
JAZF1				hsa-let-7a-5p	SFSWAP		hsa-miR-100-5p	CUL5		hsa-miR-125b-5p	LACTB					hsa-miR-142-3p	HSD17B12		hsa-miR-143-3p	PNPO		hsa-miR-144-3p	MBNL1		hsa-miR-145-5p	TNR		hsa-miR-16-5p	DCAF17		hsa-miR-19b-3p	MTMR6		hsa-miR-20a-5p	ZFYVE21		hsa-miR-21-5p	RUFY3		hsa-miR-221-3p	ZEB2		hsa-miR-222-3p	ETS1		hsa-miR-23a-3p	STT3B
CSNK2A1				hsa-let-7a-5p	GGPS1		hsa-miR-100-5p	FGFR3		hsa-miR-125b-5p	PTGS1					hsa-miR-142-3p	PTPRJ		hsa-miR-143-3p	SLC30A9		hsa-miR-144-3p	TMED5		hsa-miR-145-5p	POU5F1		hsa-miR-16-5p	CCNE1		hsa-miR-19b-3p	LRIG3		hsa-miR-20a-5p	TMEM200C		hsa-miR-21-5p	DCP1A		hsa-miR-221-3p	GPR107		hsa-miR-222-3p	PPP2R2A		hsa-miR-23a-3p	SERINC3
BEND4				hsa-let-7a-5p	LARP1		hsa-miR-100-5p	GFOD1		hsa-miR-125b-5p	SPATA5					hsa-miR-142-3p	KIF5B		hsa-miR-143-3p	FSD2		hsa-miR-144-3p	MFSD6		hsa-miR-145-5p	PTP4A2		hsa-miR-16-5p	MACF1		hsa-miR-19b-3p	ELOVL5		hsa-miR-20a-5p	WAC		hsa-miR-21-5p	CYP4V2		hsa-miR-221-3p	NCL		hsa-miR-222-3p	NLE1		hsa-miR-23a-3p	ZNF275
LTA4H				hsa-let-7a-5p	GABPB1		hsa-miR-100-5p	CBX3		hsa-miR-125b-5p	PIK3CD					hsa-miR-142-3p	ZNF217		hsa-miR-143-3p	LRRC2		hsa-miR-144-3p	NR2F2		hsa-miR-145-5p	ZNF772		hsa-miR-16-5p	C3orf36		hsa-miR-19b-3p	G3BP2		hsa-miR-20a-5p	DNAJB9		hsa-miR-21-5p	MSH6		hsa-miR-221-3p	SSX2IP		hsa-miR-222-3p	C18orf25		hsa-miR-23a-3p	EN2
RQCD1				hsa-let-7a-5p	SPATS2		hsa-miR-100-5p	RPS15		hsa-miR-125b-5p	BCKDK					hsa-miR-142-3p	CCNT2		hsa-miR-143-3p	GJD2		hsa-miR-144-3p	BICD2		hsa-miR-145-5p	IMMP2L		hsa-miR-16-5p	STK33		hsa-miR-19b-3p	TMOD3		hsa-miR-20a-5p	ZNF385A		hsa-miR-21-5p	FOXN3		hsa-miR-221-3p	BRD1		hsa-miR-222-3p	SUN2		hsa-miR-23a-3p	STARD7
ZFP36L1				hsa-let-7a-5p	ZNF460		hsa-miR-100-5p	ARPP19		hsa-miR-125b-5p	LSM4					hsa-miR-142-3p	DTD1		hsa-miR-143-3p	GLUL		hsa-miR-144-3p	UBE2A		hsa-miR-145-5p	SOX2		hsa-miR-16-5p	HARS2		hsa-miR-19b-3p	STK4		hsa-miR-20a-5p	NFIB		hsa-miR-21-5p	TGFBR2		hsa-miR-221-3p	PIK3R1		hsa-miR-222-3p	OIP5		hsa-miR-23a-3p	C2orf69
ITGA3				hsa-let-7a-5p	ESPL1		hsa-miR-100-5p	DCAF6		hsa-miR-125b-5p	NUP205					hsa-miR-142-3p	NSFL1C		hsa-miR-143-3p	SLC25A33		hsa-miR-144-3p	PCCB		hsa-miR-145-5p	MIXL1		hsa-miR-16-5p	RPS3		hsa-miR-19b-3p	OCRL		hsa-miR-20a-5p	KIAA1191		hsa-miR-21-5p	MEF2A		hsa-miR-221-3p	CLIC1		hsa-miR-222-3p	SRSF2		hsa-miR-23a-3p	HMGB2
SLC35C1				hsa-let-7a-5p	NR1I2		hsa-miR-100-5p	HS3ST2		hsa-miR-125b-5p	SUPT6H					hsa-miR-142-3p	FAM127B		hsa-miR-143-3p	MAPK7		hsa-miR-144-3p	MLEC		hsa-miR-145-5p	ORC4		hsa-miR-16-5p	PPIL1		hsa-miR-19b-3p	RLIM		hsa-miR-20a-5p	WDR1		hsa-miR-21-5p	USP47		hsa-miR-221-3p	HIST2H2AC		hsa-miR-222-3p	STOX2		hsa-miR-23a-3p	TOP1
ZNF611				hsa-let-7a-5p	FAM222B		hsa-miR-100-5p	EIF5AL1		hsa-miR-125b-5p	NKIRAS2					hsa-miR-142-3p	HOXA13		hsa-miR-143-3p	PRRC2B		hsa-miR-144-3p	HOXA10		hsa-miR-145-5p	AGPS		hsa-miR-16-5p	LSM11		hsa-miR-19b-3p	RNF111		hsa-miR-20a-5p	RBM12B		hsa-miR-21-5p	PDCD4		hsa-miR-221-3p	MKKS		hsa-miR-222-3p	BRWD1		hsa-miR-23a-3p	MGAT5
HOXC4				hsa-let-7a-5p	NOM1		hsa-miR-100-5p	TCP1		hsa-miR-125b-5p	AGPAT6					hsa-miR-142-3p	OSBP		hsa-miR-143-3p	PHAX		hsa-miR-144-3p	KPNA2		hsa-miR-145-5p	CTNND1		hsa-miR-16-5p	MLLT6		hsa-miR-19b-3p	FAM195A		hsa-miR-20a-5p	RAB5B		hsa-miR-21-5p	RPS7		hsa-miR-221-3p	ANXA1		hsa-miR-222-3p	ZNF772		hsa-miR-23a-3p	SWAP70
C11orf57				hsa-let-7a-5p	RABL2B		hsa-miR-100-5p	DOLK		hsa-miR-125b-5p	IKZF3					hsa-miR-142-3p	KAT7		hsa-miR-143-3p	ANKRD9		hsa-miR-144-3p	HSPE1-MOB4		hsa-miR-145-5p	NUFIP2		hsa-miR-16-5p	AMOTL1		hsa-miR-19b-3p	MB21D1		hsa-miR-20a-5p	AAK1		hsa-miR-21-5p	RHOB		hsa-miR-221-3p	TOB2		hsa-miR-222-3p	HEXIM1		hsa-miR-23a-3p	TOPBP1
AKAP17A				hsa-let-7a-5p	NAP1L1		hsa-miR-100-5p	DDAH1		hsa-miR-125b-5p	TNFAIP3					hsa-miR-142-3p	DCAF12		hsa-miR-143-3p	CHST10		hsa-miR-144-3p	ZFX		hsa-miR-145-5p	ZFAND3		hsa-miR-16-5p	POLR3A		hsa-miR-19b-3p	PAICS		hsa-miR-20a-5p	PPARG		hsa-miR-21-5p	DDX3X		hsa-miR-221-3p	HIST2H3D		hsa-miR-222-3p	DDX21		hsa-miR-23a-3p	BTLA
APP				hsa-let-7a-5p	SLC11A2		hsa-miR-100-5p	NLRP3		hsa-miR-125b-5p	FAM91A1					hsa-miR-142-3p	PCDHB14		hsa-miR-143-3p	ZBTB44		hsa-miR-144-3p	LSM14A		hsa-miR-145-5p	TGFBR2		hsa-miR-16-5p	RUNX1T1		hsa-miR-19b-3p	LONRF1		hsa-miR-20a-5p	WBP4		hsa-miR-21-5p	CDK2AP1		hsa-miR-221-3p	TDRP		hsa-miR-222-3p	HDLBP		hsa-miR-23a-3p	FASTKD5
TMEM39A				hsa-let-7a-5p	ZBTB8OS		hsa-miR-100-5p	PLK1		hsa-miR-125b-5p	RASGRP1					hsa-miR-142-3p	SLC39A9		hsa-miR-143-3p	RAB22A		hsa-miR-144-3p	ZFX		hsa-miR-145-5p	FSCN1		hsa-miR-16-5p	AP5Z1		hsa-miR-19b-3p	MBNL2		hsa-miR-20a-5p	IFNAR2		hsa-miR-21-5p	ARHGAP21		hsa-miR-221-3p	ATP6V1E1		hsa-miR-222-3p	PTEN		hsa-miR-23a-3p	TNRC6A
C2CD4A				hsa-let-7a-5p	PRDM1		hsa-miR-100-5p	OXA1L		hsa-miR-125b-5p	BAK1					hsa-miR-142-3p	DDX17		hsa-miR-143-3p	RAB33B		hsa-miR-144-3p	DCAF12L2		hsa-miR-145-5p	TNFSF13		hsa-miR-16-5p	SLC35A1		hsa-miR-19b-3p	CHEK2		hsa-miR-20a-5p	MTPAP		hsa-miR-21-5p	PTEN		hsa-miR-221-3p	PCDHA1		hsa-miR-222-3p	PLXNB2		hsa-miR-23a-3p	RPL7L1
GRPEL2				hsa-let-7a-5p	AHCYL2		hsa-miR-100-5p	HIST2H2AA3		hsa-miR-125b-5p	CBFB					hsa-miR-142-3p	USP6NL		hsa-miR-143-3p	PGLS		hsa-miR-144-3p	ZC3H11A		hsa-miR-145-5p	NEDD9		hsa-miR-16-5p	RMDN1		hsa-miR-19b-3p	ZDHHC18		hsa-miR-20a-5p	ATAD2		hsa-miR-21-5p	SCAF11		hsa-miR-221-3p	RNPS1		hsa-miR-222-3p	SKIV2L		hsa-miR-23a-3p	ZNF578
DHX57				hsa-let-7a-5p	KREMEN1		hsa-miR-100-5p	PLK1		hsa-miR-125b-5p	THRAP3					hsa-miR-142-3p	LOX		hsa-miR-143-3p	SKAP2		hsa-miR-144-3p	TMBIM6		hsa-miR-145-5p	FSCN1		hsa-miR-16-5p	PDE4D		hsa-miR-19b-3p	CTR9		hsa-miR-20a-5p	FJX1		hsa-miR-21-5p	MSH2		hsa-miR-221-3p	HSPA1B		hsa-miR-222-3p	PDXDC1		hsa-miR-23a-3p	CAMKV
E2F6				hsa-let-7a-5p	AGO2		hsa-miR-100-5p	DCBLD1		hsa-miR-125b-5p	RASAL2					hsa-miR-142-3p	RGS5		hsa-miR-143-3p	CENPP		hsa-miR-144-3p	FGB		hsa-miR-145-5p	AKR1B10		hsa-miR-16-5p	ZBTB34		hsa-miR-19b-3p	BAMBI		hsa-miR-20a-5p	EGLN3		hsa-miR-21-5p	SMNDC1		hsa-miR-221-3p	DKK2		hsa-miR-222-3p	ZBTB37		hsa-miR-23a-3p	TRIM59
ICOSLG				hsa-let-7a-5p	SUMO1		hsa-miR-100-5p	GRB2		hsa-miR-125b-5p	SLC16A4					hsa-miR-142-3p	SLC7A11		hsa-miR-143-3p	ZNF440		hsa-miR-144-3p	ZC3H11A		hsa-miR-145-5p	TMOD3		hsa-miR-16-5p	ZYX		hsa-miR-19b-3p	DAD1		hsa-miR-20a-5p	IRAK4		hsa-miR-21-5p	RPS7		hsa-miR-221-3p	PGPEP1		hsa-miR-222-3p	POLE		hsa-miR-23a-3p	CDH1
GORASP2				hsa-let-7a-5p	ASPM		hsa-miR-100-5p	SMARCA5		hsa-miR-125b-5p	SGPL1					hsa-miR-142-3p	FAM127A		hsa-miR-143-3p	FSCN1		hsa-miR-144-3p	ZNF207		hsa-miR-145-5p	NEDD9		hsa-miR-16-5p	RCAN3		hsa-miR-19b-3p	HARS		hsa-miR-20a-5p	HMG20A		hsa-miR-21-5p	PURA		hsa-miR-221-3p	FOXO3		hsa-miR-222-3p	TSPAN13		hsa-miR-23a-3p	ZNF669
C1orf21				hsa-let-7a-5p	JAZF1		hsa-miR-100-5p	NDUFC2		hsa-miR-125b-5p	MTF1					hsa-miR-142-3p	STX6		hsa-miR-143-3p	BTF3L4		hsa-miR-144-3p	SEMA5A		hsa-miR-145-5p	RREB1		hsa-miR-16-5p	CDIPT		hsa-miR-19b-3p	WBP4		hsa-miR-20a-5p	MFSD8		hsa-miR-21-5p	ATXN10		hsa-miR-221-3p	MYLIP		hsa-miR-222-3p	DAG1		hsa-miR-23a-3p	MMGT1
SMPDL3B				hsa-let-7a-5p	NHLRC3		hsa-miR-100-5p	NIP7		hsa-miR-125b-5p	FXR1					hsa-miR-142-3p	NCKAP1		hsa-miR-143-3p	PRR23A		hsa-miR-144-3p	SLC7A2		hsa-miR-145-5p	RTKN		hsa-miR-16-5p	MED24		hsa-miR-19b-3p	SEC63		hsa-miR-20a-5p	CLIC4		hsa-miR-21-5p	RPS7		hsa-miR-221-3p	KIT		hsa-miR-222-3p	GCN1L1		hsa-miR-23a-3p	SEMA6D
RWDD1				hsa-let-7a-5p	CSNK2A1		hsa-miR-100-5p	RPL15		hsa-miR-125b-5p	ACLY					hsa-miR-142-3p	MMGT1		hsa-miR-143-3p	MAPK7		hsa-miR-144-3p	ZC3H11A		hsa-miR-145-5p	PSAT1		hsa-miR-16-5p	EIF1AX		hsa-miR-19b-3p	AFF1		hsa-miR-20a-5p	MYC		hsa-miR-21-5p	RAB22A		hsa-miR-221-3p	PTBP3		hsa-miR-222-3p	STAT5A		hsa-miR-23a-3p	RPS4X
RAB40C				hsa-let-7a-5p	BEND4		hsa-miR-100-5p	RARS		hsa-miR-125b-5p	CBFB					hsa-miR-142-3p	MGLL		hsa-miR-143-3p	MAPK1		hsa-miR-144-3p	RNF111		hsa-miR-145-5p	SRPX2		hsa-miR-16-5p	ZMAT3		hsa-miR-19b-3p	DCP2		hsa-miR-20a-5p	PFKP		hsa-miR-21-5p	GPD2		hsa-miR-221-3p	ZNF35		hsa-miR-222-3p	PHRF1		hsa-miR-23a-3p	PNRC2
SOCS1				hsa-let-7a-5p	LTA4H		hsa-miR-100-5p	SET		hsa-miR-125b-5p	NES					hsa-miR-142-3p	KIAA0232		hsa-miR-143-3p	RER1		hsa-miR-144-3p	LYSMD3		hsa-miR-145-5p	POU5F1		hsa-miR-16-5p	HTRA1		hsa-miR-19b-3p	BEND3		hsa-miR-20a-5p	TIMM17A		hsa-miR-21-5p	FBXL13		hsa-miR-221-3p	BCL2L11		hsa-miR-222-3p	SS18		hsa-miR-23a-3p	MT2A
ACAD8				hsa-let-7a-5p	RQCD1		hsa-miR-100-5p	NDE1		hsa-miR-125b-5p	KLF13					hsa-miR-142-3p	SCAMP1		hsa-miR-143-3p	COL3A1		hsa-miR-144-3p	LZIC		hsa-miR-145-5p	TMEM9B		hsa-miR-16-5p	RARB		hsa-miR-19b-3p	SAMD8		hsa-miR-20a-5p	SUV420H1		hsa-miR-21-5p	PTEN		hsa-miR-221-3p	ACVR2B		hsa-miR-222-3p	LUC7L2		hsa-miR-23a-3p	NACC1
CHTOP				hsa-let-7a-5p	ZFP36L1		hsa-miR-100-5p	IGF1R		hsa-miR-125b-5p	NME2					hsa-miR-142-3p	ZNF529		hsa-miR-143-3p	ORAI2		hsa-miR-144-3p	HSPA13		hsa-miR-145-5p	COL5A1		hsa-miR-16-5p	DNAJA1		hsa-miR-19b-3p	MMGT1		hsa-miR-20a-5p	ZNF7		hsa-miR-21-5p	MED9		hsa-miR-221-3p	MDFIC		hsa-miR-222-3p	VCL		hsa-miR-23a-3p	TNFAIP3
AREL1				hsa-let-7a-5p	ITGA3		hsa-miR-100-5p	SMARCA5		hsa-miR-125b-5p	GRINA					hsa-miR-142-3p	SYT4					hsa-miR-144-3p	CHORDC1		hsa-miR-145-5p	KLF4		hsa-miR-16-5p	DDX52		hsa-miR-19b-3p	TNFRSF10B		hsa-miR-20a-5p	LAPTM4A		hsa-miR-21-5p	PRKAB2		hsa-miR-221-3p	SOCS3		hsa-miR-222-3p	TIMP3		hsa-miR-23a-3p	NACC1
MTHFD1				hsa-let-7a-5p	SLC35C1		hsa-miR-100-5p	RPLP1		hsa-miR-125b-5p	TNRC6B					hsa-miR-142-3p	TAB2					hsa-miR-144-3p	TMEM192		hsa-miR-145-5p	TSPAN6		hsa-miR-16-5p	CYB5R1		hsa-miR-19b-3p	YTHDF1		hsa-miR-20a-5p	MAPKAPK5		hsa-miR-21-5p	RFFL		hsa-miR-221-3p	CDKN1B		hsa-miR-222-3p	LYN		hsa-miR-23a-3p	PDCD6IP
PAK1				hsa-let-7a-5p	ZNF611		hsa-miR-100-5p	HSPA14		hsa-miR-125b-5p	SMARCD2					hsa-miR-142-3p	SCD					hsa-miR-144-3p	NAA30		hsa-miR-145-5p	HMGA2		hsa-miR-16-5p	ERLIN2		hsa-miR-19b-3p	DDX3X		hsa-miR-20a-5p	TMX3		hsa-miR-21-5p	ACAT1		hsa-miR-221-3p	PAK1		hsa-miR-222-3p	ZFP30		hsa-miR-23a-3p	ZNF669
REPS1				hsa-let-7a-5p	HOXC4		hsa-miR-100-5p	MBIP		hsa-miR-125b-5p	CEBPG					hsa-miR-142-3p	KBTBD2					hsa-miR-144-3p	RPL7L1		hsa-miR-145-5p	CYP2C19		hsa-miR-16-5p	C16orf72		hsa-miR-19b-3p	WASL		hsa-miR-20a-5p	HOOK3		hsa-miR-21-5p	TNFRSF11B		hsa-miR-221-3p	LHFPL2		hsa-miR-222-3p	RANBP10		hsa-miR-23a-3p	MC2R
IPO9				hsa-let-7a-5p	C11orf57		hsa-miR-100-5p	SGTB		hsa-miR-125b-5p	PFKM					hsa-miR-142-3p	MAN1A2					hsa-miR-144-3p	MYO5A		hsa-miR-145-5p	IVNS1ABP		hsa-miR-16-5p	CA12		hsa-miR-19b-3p	TMEM9B		hsa-miR-20a-5p	TPRG1L		hsa-miR-21-5p	BTG2		hsa-miR-221-3p	GLYR1		hsa-miR-222-3p	INPP4B		hsa-miR-23a-3p	ZNF704
PGM2L1				hsa-let-7a-5p	AKAP17A		hsa-miR-100-5p	YTHDC1		hsa-miR-125b-5p	VDR					hsa-miR-142-3p	NAP1L2					hsa-miR-144-3p	ARL5B		hsa-miR-145-5p	SP1		hsa-miR-16-5p	GSTT2B		hsa-miR-19b-3p	ZBTB18		hsa-miR-20a-5p	GRK7		hsa-miR-21-5p	B3GNT5		hsa-miR-221-3p	BBC3		hsa-miR-222-3p	DAXX		hsa-miR-23a-3p	DYNC2LI1
RPL9				hsa-let-7a-5p	APP		hsa-miR-100-5p	TMEM30A		hsa-miR-125b-5p	C17orf80					hsa-miR-142-3p	INPP5A					hsa-miR-144-3p	NACC1		hsa-miR-145-5p	VEGFA		hsa-miR-16-5p	CREBRF		hsa-miR-19b-3p	POGZ		hsa-miR-20a-5p	BICD2		hsa-miR-21-5p	WWC2		hsa-miR-221-3p	ICAM1		hsa-miR-222-3p	SHISA2		hsa-miR-23a-3p	C2orf69
VDR				hsa-let-7a-5p	TMEM39A		hsa-miR-100-5p	AGPAT3		hsa-miR-125b-5p	MMAB					hsa-miR-142-3p	SLC35E1					hsa-miR-144-3p	DIDO1		hsa-miR-145-5p	SMAD4		hsa-miR-16-5p	AGPAT5		hsa-miR-19b-3p	ZNF800		hsa-miR-20a-5p	SMIM13		hsa-miR-21-5p	MSH2		hsa-miR-221-3p	OIP5		hsa-miR-222-3p	TMCC1		hsa-miR-23a-3p	NLK
FAM105A				hsa-let-7a-5p	TRIM71		hsa-miR-100-5p	GTF2H1		hsa-miR-125b-5p	GOLGA8A					hsa-miR-142-3p	C2					hsa-miR-144-3p	MLANA		hsa-miR-145-5p	FSCN1		hsa-miR-16-5p	RTN4		hsa-miR-19b-3p	EOGT		hsa-miR-20a-5p	SELENBP1		hsa-miR-21-5p	ABCD3		hsa-miR-221-3p	BRWD1		hsa-miR-222-3p	DMWD		hsa-miR-23a-3p	ZNF268
USP38				hsa-let-7a-5p	C2CD4A		hsa-miR-100-5p	TSC22D1		hsa-miR-125b-5p	ETS1					hsa-miR-142-3p	ATXN3					hsa-miR-144-3p	ZBTB20		hsa-miR-145-5p	SERPINE1		hsa-miR-16-5p	SOX6		hsa-miR-19b-3p	ELOVL5		hsa-miR-20a-5p	GIGYF1		hsa-miR-21-5p	GOLGA4		hsa-miR-221-3p	AGAP1		hsa-miR-222-3p	PTEN		hsa-miR-23a-3p	TRRAP
ANGEL2				hsa-let-7a-5p	GRPEL2		hsa-miR-100-5p	GRHL1		hsa-miR-125b-5p	ARF3					hsa-miR-142-3p	CCDC6					hsa-miR-144-3p	DYNC2LI1		hsa-miR-145-5p	PODXL		hsa-miR-16-5p	DECR1		hsa-miR-19b-3p	SKIL		hsa-miR-20a-5p	ASB1		hsa-miR-21-5p	PAN3		hsa-miR-221-3p	MMP2		hsa-miR-222-3p	PPP2R1A		hsa-miR-23a-3p	NUFIP2
FBXW2				hsa-let-7a-5p	DHX57		hsa-miR-100-5p	CTC1		hsa-miR-125b-5p	LIF					hsa-miR-142-3p	DNAJB6					hsa-miR-144-3p	RAC1		hsa-miR-145-5p	ANGPT2		hsa-miR-16-5p	SMAD7		hsa-miR-19b-3p	FRS2		hsa-miR-20a-5p	EFCAB11		hsa-miR-21-5p	MMP2		hsa-miR-221-3p	UHRF1		hsa-miR-222-3p	HAUS8		hsa-miR-23a-3p	VCAM1
ZNF746				hsa-let-7a-5p	E2F6		hsa-miR-100-5p	UBB		hsa-miR-125b-5p	SCARB2					hsa-miR-142-3p	HMGA2					hsa-miR-144-3p	UBN2		hsa-miR-145-5p	CTGF		hsa-miR-16-5p	FAM69A		hsa-miR-19b-3p	PPP1R15B		hsa-miR-20a-5p	RLIM		hsa-miR-21-5p	PPAP2A		hsa-miR-221-3p	USP28		hsa-miR-222-3p	DAZAP1		hsa-miR-23a-3p	SESN2
RPS3A				hsa-let-7a-5p	ICOSLG		hsa-miR-100-5p	KATNBL1		hsa-miR-125b-5p	BBC3					hsa-miR-142-3p	TPSG1					hsa-miR-144-3p	HNRNPAB		hsa-miR-145-5p	C11orf65		hsa-miR-16-5p	KIDINS220		hsa-miR-19b-3p	RAB5B		hsa-miR-20a-5p	CRTC3		hsa-miR-21-5p	PTPDC1		hsa-miR-221-3p	CTCF		hsa-miR-222-3p	SMARCA4		hsa-miR-23a-3p	JMJD1C
SYNJ2BP				hsa-let-7a-5p	GORASP2		hsa-miR-100-5p	MTOR		hsa-miR-125b-5p	NTRK3					hsa-miR-142-3p	IPMK					hsa-miR-144-3p	NOTCH1		hsa-miR-145-5p	ADAM17		hsa-miR-16-5p	SOCS5		hsa-miR-19b-3p	DDX6		hsa-miR-20a-5p	METTL8		hsa-miR-21-5p	TTC33		hsa-miR-221-3p	MBNL1		hsa-miR-222-3p	SLC37A4		hsa-miR-23a-3p	TXNL4A
RFC2				hsa-let-7a-5p	C1orf21		hsa-miR-100-5p	DEAF1		hsa-miR-125b-5p	IKZF4					hsa-miR-142-3p	SRRD					hsa-miR-144-3p	MKLN1		hsa-miR-145-5p	IRS1		hsa-miR-16-5p	CYB561A3		hsa-miR-19b-3p	MAP2K3		hsa-miR-20a-5p	PPAN		hsa-miR-21-5p	DSE		hsa-miR-221-3p	MTSS1L		hsa-miR-222-3p	FYTTD1		hsa-miR-23a-3p	CEP57L1
PLAGL2				hsa-let-7a-5p	SMPDL3B		hsa-miR-100-5p	NFIA		hsa-miR-125b-5p	EMD					hsa-miR-142-3p	ATXN3					hsa-miR-144-3p	FAM122B		hsa-miR-145-5p	IGF1R		hsa-miR-16-5p	PSAT1		hsa-miR-19b-3p	SMYD2		hsa-miR-20a-5p	ZBTB18		hsa-miR-21-5p	KLHL15		hsa-miR-221-3p	GTF2E1		hsa-miR-222-3p	RNPS1		hsa-miR-23a-3p	ADAM17
TAB2				hsa-let-7a-5p	RWDD1		hsa-miR-100-5p	SMARCA5		hsa-miR-125b-5p	DYNC2H1					hsa-miR-142-3p	FAM65A					hsa-miR-144-3p	NANOGNB		hsa-miR-145-5p	MMP12		hsa-miR-16-5p	BZW1		hsa-miR-19b-3p	RHOB		hsa-miR-20a-5p	MKNK2		hsa-miR-21-5p	BCL2		hsa-miR-221-3p	KIT		hsa-miR-222-3p	HNRNPD		hsa-miR-23a-3p	SLC6A6
PEX11B				hsa-let-7a-5p	RAB40C		hsa-miR-100-5p	LIN28B		hsa-miR-125b-5p	TRIM71					hsa-miR-142-3p	CDKN1B					hsa-miR-144-3p	ZNF284		hsa-miR-145-5p	POU5F1		hsa-miR-16-5p	COMT		hsa-miR-19b-3p	DSCR3		hsa-miR-20a-5p	DNAJB13		hsa-miR-21-5p	TIMP3		hsa-miR-221-3p	PRDM16		hsa-miR-222-3p	MYLIP		hsa-miR-23a-3p	ZNF485
ATXN7L3B				hsa-let-7a-5p	SOCS1		hsa-miR-100-5p	RPS27		hsa-miR-125b-5p	ABTB1					hsa-miR-142-3p	BACH1					hsa-miR-144-3p	ZNF800		hsa-miR-145-5p	PODXL		hsa-miR-16-5p	MAPKAPK2		hsa-miR-19b-3p	MALT1		hsa-miR-20a-5p	FEM1B		hsa-miR-21-5p	EGFR		hsa-miR-221-3p	PCDHA6		hsa-miR-222-3p	RNF10		hsa-miR-23a-3p	ZNF550
ATP2A2				hsa-let-7a-5p	KRAS		hsa-miR-100-5p	FOXN2		hsa-miR-125b-5p	FMNL3					hsa-miR-142-3p	SOCS5					hsa-miR-144-3p	ARID1B		hsa-miR-145-5p	CDH2		hsa-miR-16-5p	ACVR2A		hsa-miR-19b-3p	ABCA2		hsa-miR-20a-5p	KIAA0232		hsa-miR-21-5p	EIF4EBP2		hsa-miR-221-3p	PEX19		hsa-miR-222-3p	CPSF6		hsa-miR-23a-3p	STS
KIAA2026				hsa-let-7a-5p	ACAD8		hsa-miR-100-5p	SREK1IP1		hsa-miR-125b-5p	RPS3A					hsa-miR-142-3p	HECTD1					hsa-miR-144-3p	TFAP4		hsa-miR-145-5p	HBEGF		hsa-miR-16-5p	PLEC		hsa-miR-19b-3p	SOGA1		hsa-miR-20a-5p	MICB		hsa-miR-21-5p	TPM1		hsa-miR-221-3p	MGMT		hsa-miR-222-3p	HDGF		hsa-miR-23a-3p	RNF38
MDM4				hsa-let-7a-5p	CHTOP		hsa-miR-100-5p	YBX3		hsa-miR-125b-5p	IFRD2					hsa-miR-142-3p	USP6NL					hsa-miR-144-3p	DIDO1		hsa-miR-145-5p	CBFB		hsa-miR-16-5p	BSG		hsa-miR-19b-3p	RAB8B		hsa-miR-20a-5p	WIPF2		hsa-miR-21-5p	PDCD4		hsa-miR-221-3p	PTEN		hsa-miR-222-3p	CDKN1B		hsa-miR-23a-3p	ZNF485
HRAS				hsa-let-7a-5p	SLC10A7		hsa-miR-100-5p	ANAPC11		hsa-miR-125b-5p	LIN28A					hsa-miR-142-3p	HMGA2					hsa-miR-144-3p	NGFRAP1		hsa-miR-145-5p	CDK6		hsa-miR-16-5p	EIF4G3		hsa-miR-19b-3p	PGK1		hsa-miR-20a-5p	KIF23		hsa-miR-21-5p	PURG		hsa-miR-221-3p	CREBZF		hsa-miR-222-3p	UBN2		hsa-miR-23a-3p	VCAM1
SLC38A7				hsa-let-7a-5p	AREL1		hsa-miR-100-5p	ZNF511		hsa-miR-125b-5p	KIF24					hsa-miR-142-3p	MARCKS					hsa-miR-144-3p	NACC1		hsa-miR-145-5p	NRAS		hsa-miR-16-5p	TUBGCP2		hsa-miR-19b-3p	ZBTB4		hsa-miR-20a-5p	AKAP11		hsa-miR-21-5p	FANCI		hsa-miR-221-3p	MDM2		hsa-miR-222-3p	MCM3AP		hsa-miR-23a-3p	TOR1AIP1
GTF3C1				hsa-let-7a-5p	MTHFD1		hsa-miR-100-5p	PLK1		hsa-miR-125b-5p	SEMA4C					hsa-miR-142-3p	GNAS					hsa-miR-144-3p	SAMD12		hsa-miR-145-5p	MAP2K4		hsa-miR-16-5p	CHIC1		hsa-miR-19b-3p	TGFBR2		hsa-miR-20a-5p	SESN2		hsa-miR-21-5p	BCL2		hsa-miR-221-3p	DICER1		hsa-miR-222-3p	FBXW2		hsa-miR-23a-3p	FLNA
KIAA0391				hsa-let-7a-5p	PAK1		hsa-miR-100-5p	FARSB		hsa-miR-125b-5p	TBC1D1					hsa-miR-142-3p	BCLAF1					hsa-miR-144-3p	KPNA2		hsa-miR-145-5p	F11R		hsa-miR-16-5p	GLT8D1		hsa-miR-19b-3p	SESTD1		hsa-miR-20a-5p	ERGIC2		hsa-miR-21-5p	VEGFA		hsa-miR-221-3p	CXorf38		hsa-miR-222-3p	HMGA1		hsa-miR-23a-3p	TNFAIP8
PTGES2				hsa-let-7a-5p	REPS1		hsa-miR-100-5p	RRM2		hsa-miR-125b-5p	E2F3					hsa-miR-142-3p	TWSG1					hsa-miR-144-3p	ARL5B		hsa-miR-145-5p	SOCS7		hsa-miR-16-5p	LRRC57		hsa-miR-19b-3p	BMP3		hsa-miR-20a-5p	ZNFX1		hsa-miR-21-5p	APPL1		hsa-miR-221-3p	PSMB5		hsa-miR-222-3p	TEX10		hsa-miR-23a-3p	ASNS
KLHDC8B				hsa-let-7a-5p	IPO9		hsa-miR-100-5p	H3F3A		hsa-miR-125b-5p	PKM					hsa-miR-142-3p	GLCE					hsa-miR-144-3p	MYO5A		hsa-miR-145-5p	PAK4		hsa-miR-16-5p	CEP55		hsa-miR-19b-3p	CAPRIN2		hsa-miR-20a-5p	RPS27A		hsa-miR-21-5p	BRCA1		hsa-miR-221-3p	MAPK10		hsa-miR-222-3p	PIWIL1		hsa-miR-23a-3p	ZNF704
ATG4C				hsa-let-7a-5p	PGM2L1		hsa-miR-100-5p	PPP1CB		hsa-miR-125b-5p	STARD13					hsa-miR-142-3p	ARF4					hsa-miR-144-3p	TBX18		hsa-miR-145-5p	AGTRAP		hsa-miR-16-5p	C9orf89		hsa-miR-19b-3p	WDR1		hsa-miR-20a-5p	NUDT21		hsa-miR-21-5p	AGO2		hsa-miR-221-3p	NME2		hsa-miR-222-3p	OIP5		hsa-miR-23a-3p	BSDC1
IGDCC4				hsa-let-7a-5p	RPL9		hsa-miR-100-5p	EWSR1		hsa-miR-125b-5p	UNG					hsa-miR-142-3p	ZMYND8					hsa-miR-144-3p	GPR50		hsa-miR-145-5p	HLTF		hsa-miR-16-5p	ADAD2		hsa-miR-19b-3p	NDRG1		hsa-miR-20a-5p	FICD		hsa-miR-21-5p	NR2C2		hsa-miR-221-3p	STAT5A		hsa-miR-222-3p	BBC3		hsa-miR-23a-3p	FNIP1
UPP2				hsa-let-7a-5p	FIGN		hsa-miR-100-5p	RPL10A		hsa-miR-125b-5p	CDKN2A					hsa-miR-142-3p	SERPINH1					hsa-miR-144-3p	IL20RB		hsa-miR-145-5p	CCDC85C		hsa-miR-16-5p	BMI1		hsa-miR-19b-3p	LDLR		hsa-miR-20a-5p	TSG101		hsa-miR-21-5p	PTEN		hsa-miR-221-3p	SOCS1		hsa-miR-222-3p	MEA1		hsa-miR-23a-3p	HMGCS1
RRM2				hsa-let-7a-5p	VDR		hsa-miR-100-5p	KBTBD8		hsa-miR-125b-5p	HOXA13					hsa-miR-142-3p	SKP2					hsa-miR-144-3p	FZD6		hsa-miR-145-5p	GMFB		hsa-miR-16-5p	DDX31		hsa-miR-19b-3p	SERINC3		hsa-miR-20a-5p	CAMK2N2		hsa-miR-21-5p	ZBTB47		hsa-miR-221-3p	TIMP3		hsa-miR-222-3p	ZFAND5		hsa-miR-23a-3p	CD302
DIABLO				hsa-let-7a-5p	FAM105A		hsa-miR-100-5p	ATAT1		hsa-miR-125b-5p	MKNK2					hsa-miR-142-3p	PIK3CG					hsa-miR-144-3p	ARID1B		hsa-miR-145-5p	SP7		hsa-miR-16-5p	SLC39A9		hsa-miR-19b-3p	CPPED1		hsa-miR-20a-5p	RPL30		hsa-miR-21-5p	BTBD3		hsa-miR-221-3p	STAMBP		hsa-miR-222-3p	KIT		hsa-miR-23a-3p	VAV3
QDPR				hsa-let-7a-5p	USP38		hsa-miR-100-5p	MED12		hsa-miR-125b-5p	TMEM9					hsa-miR-142-3p	CLOCK					hsa-miR-144-3p	WRN		hsa-miR-145-5p	PADI1		hsa-miR-16-5p	STX17		hsa-miR-19b-3p	IDNK		hsa-miR-20a-5p	MFSD8		hsa-miR-21-5p	TPM1		hsa-miR-221-3p	ZFP30		hsa-miR-222-3p	ZFYVE9		hsa-miR-23a-3p	POM121C
DSC3				hsa-let-7a-5p	NCKIPSD		hsa-miR-100-5p	RPL36A		hsa-miR-125b-5p	SCARB2					hsa-miR-142-3p	ZNF24					hsa-miR-144-3p	WNT7A		hsa-miR-145-5p	DDX17		hsa-miR-16-5p	DNAJC9		hsa-miR-19b-3p	STEAP2		hsa-miR-20a-5p	TFAM		hsa-miR-21-5p	ZNF217		hsa-miR-221-3p	PEG10		hsa-miR-222-3p	EXOSC10		hsa-miR-23a-3p	PAFAH1B3
WIPI2				hsa-let-7a-5p	ANGEL2		hsa-miR-100-5p	KBTBD8		hsa-miR-125b-5p	RNASEH2A					hsa-miR-142-3p	STAM					hsa-miR-144-3p	OXR1		hsa-miR-145-5p	IRS2		hsa-miR-16-5p	RBPJ		hsa-miR-19b-3p	STX6		hsa-miR-20a-5p	CCSER2		hsa-miR-21-5p	MDM4		hsa-miR-221-3p	FBXO28		hsa-miR-222-3p	RABL6		hsa-miR-23a-3p	HMGB2
TMTC3				hsa-let-7a-5p	FBXW2		hsa-miR-100-5p	CDC73		hsa-miR-125b-5p	ASB16					hsa-miR-142-3p	PSMB5					hsa-miR-144-3p	NR2F2		hsa-miR-145-5p	SLC22A9		hsa-miR-16-5p	TMEM109		hsa-miR-19b-3p	E2F8		hsa-miR-20a-5p	HMGB3		hsa-miR-21-5p	IL12A		hsa-miR-221-3p	TMCC1		hsa-miR-222-3p	TMED7		hsa-miR-23a-3p	SOD2
ANKRD17				hsa-let-7a-5p	ZNF746		hsa-miR-100-5p	UNC50		hsa-miR-125b-5p	NPM1					hsa-miR-142-3p	FAM209A					hsa-miR-144-3p	ANKRD11		hsa-miR-145-5p	MTMR14		hsa-miR-16-5p	FBXO3		hsa-miR-19b-3p	PRKACB		hsa-miR-20a-5p	GOLGA2		hsa-miR-21-5p	HNRNPH1		hsa-miR-221-3p	NFYC		hsa-miR-222-3p	HNRNPH1		hsa-miR-23a-3p	C8orf58
HIST2H2BE				hsa-let-7a-5p	RPS3A		hsa-miR-100-5p	YWHAE		hsa-miR-125b-5p	SLC7A1					hsa-miR-142-3p	PCDHGA2					hsa-miR-144-3p	WNK1		hsa-miR-145-5p	CBFB		hsa-miR-16-5p	ZBTB33		hsa-miR-19b-3p	PTEN		hsa-miR-20a-5p	LDLR		hsa-miR-21-5p	PARP1		hsa-miR-221-3p	PALB2		hsa-miR-222-3p	FAM84A		hsa-miR-23a-3p	ZNF208
PDE12				hsa-let-7a-5p	SYNJ2BP		hsa-miR-100-5p	SMCHD1		hsa-miR-125b-5p	SMO					hsa-miR-142-3p	RGL2					hsa-miR-144-3p	TSC22D2		hsa-miR-145-5p	APH1A		hsa-miR-16-5p	CCNE2		hsa-miR-19b-3p	TNFAIP3		hsa-miR-20a-5p	SRSF2		hsa-miR-21-5p	NCSTN		hsa-miR-221-3p	HECTD2		hsa-miR-222-3p	TANGO6		hsa-miR-23a-3p	RQCD1
INTS12				hsa-let-7a-5p	RFC2		hsa-miR-100-5p	PSMG2		hsa-miR-125b-5p	EMC1					hsa-miR-142-3p	HSPA1B					hsa-miR-144-3p	TMTC3		hsa-miR-145-5p	F11R		hsa-miR-16-5p	RBBP6		hsa-miR-19b-3p	UBN2		hsa-miR-20a-5p	ZNF682		hsa-miR-21-5p	DERL1		hsa-miR-221-3p	RACGAP1		hsa-miR-222-3p	FAM53C		hsa-miR-23a-3p	PPARGC1A
SEMA4C				hsa-let-7a-5p	PLAGL2		hsa-miR-100-5p	BAZ1B		hsa-miR-125b-5p	HSPBP1					hsa-miR-142-3p	HECTD1					hsa-miR-144-3p	BICD2		hsa-miR-145-5p	PPP3CA		hsa-miR-16-5p	EIF3A		hsa-miR-19b-3p	CCND2		hsa-miR-20a-5p	MFSD8		hsa-miR-21-5p	OLR1		hsa-miR-221-3p	EEF1A1		hsa-miR-222-3p	SMC2		hsa-miR-23a-3p	G6PC
WDR46				hsa-let-7a-5p	TAB2		hsa-miR-100-5p	NDUFA2		hsa-miR-125b-5p	PDS5A					hsa-miR-142-3p	ZFP36L2					hsa-miR-144-3p	IL20RB		hsa-miR-145-5p	RPS6KA3		hsa-miR-16-5p	FBXL18		hsa-miR-19b-3p	PAFAH1B2		hsa-miR-20a-5p	TSR1		hsa-miR-21-5p	DDX55		hsa-miR-221-3p	TMEM168		hsa-miR-222-3p	PPP6C		hsa-miR-23a-3p	PIGM
EDN1				hsa-let-7a-5p	PEX11B		hsa-miR-100-5p	ATP6AP1L		hsa-miR-125b-5p	ICAM2					hsa-miR-142-3p	ARL6IP6					hsa-miR-144-3p	COX10		hsa-miR-145-5p	VEGFA		hsa-miR-16-5p	EPT1		hsa-miR-19b-3p	TLR2		hsa-miR-20a-5p	TGFBR2		hsa-miR-21-5p	PLOD3		hsa-miR-221-3p	GCN1L1		hsa-miR-222-3p	PTBP3		hsa-miR-23a-3p	IMPDH2
ABHD17C				hsa-let-7a-5p	ATXN7L3B		hsa-miR-100-5p	FBXL15		hsa-miR-125b-5p	AKAP2					hsa-miR-142-3p	KIAA1191					hsa-miR-144-3p	CPS1		hsa-miR-145-5p	PDGFD		hsa-miR-16-5p	PLAUR		hsa-miR-19b-3p	ZNF521		hsa-miR-20a-5p	AKAP11		hsa-miR-21-5p	ZNF367		hsa-miR-221-3p	PCDHA7		hsa-miR-222-3p	ACTG1		hsa-miR-23a-3p	ZCCHC2
TRAF7				hsa-let-7a-5p	ATP2A2		hsa-miR-100-5p	MTO1		hsa-miR-125b-5p	CARHSP1					hsa-miR-142-3p	IFNAR2					hsa-miR-144-3p	SLC39A6		hsa-miR-145-5p	ROBO2		hsa-miR-16-5p	ABL2		hsa-miR-19b-3p	WNK1		hsa-miR-20a-5p	MFN1		hsa-miR-21-5p	HIC2		hsa-miR-221-3p	PITPNM1		hsa-miR-222-3p	KPNA6		hsa-miR-23a-3p	TNRC6A
TRIM5				hsa-let-7a-5p	MIEF1		hsa-miR-100-5p	RPL26		hsa-miR-125b-5p	REST					hsa-miR-142-3p	HSBP1					hsa-miR-144-3p	NR3C1		hsa-miR-145-5p	PODXL		hsa-miR-16-5p	ATXN2L		hsa-miR-19b-3p	MMGT1		hsa-miR-20a-5p	PPP1R15B		hsa-miR-21-5p	GID4		hsa-miR-221-3p	BRAP		hsa-miR-222-3p	SON		hsa-miR-23a-3p	LEMD2
NOA1				hsa-let-7a-5p	KIAA2026		hsa-miR-100-5p	SERBP1		hsa-miR-125b-5p	MFSD9					hsa-miR-142-3p	IRAK1					hsa-miR-144-3p	LMNB2		hsa-miR-145-5p	LMNB2		hsa-miR-16-5p	LUZP1		hsa-miR-19b-3p	NR3C2		hsa-miR-20a-5p	ZNFX1		hsa-miR-21-5p	SSFA2		hsa-miR-221-3p	CPSF6		hsa-miR-222-3p	MGMT		hsa-miR-23a-3p	SPTY2D1
ZNF587				hsa-let-7a-5p	MDM4		hsa-miR-100-5p	ATP5L		hsa-miR-125b-5p	PABPC4					hsa-miR-142-3p	C7orf31					hsa-miR-144-3p	KPNA2		hsa-miR-145-5p	SERINC5		hsa-miR-16-5p	CD55		hsa-miR-19b-3p	BCL7B		hsa-miR-20a-5p	CSDE1		hsa-miR-21-5p	RECK		hsa-miR-221-3p	ARID1A		hsa-miR-222-3p	KNSTRN		hsa-miR-23a-3p	SEPT2
RPL35A				hsa-let-7a-5p	THBS1		hsa-miR-100-5p	KBTBD8		hsa-miR-125b-5p	PRKAG1					hsa-miR-142-3p	TWF1					hsa-miR-144-3p	PPP2R2A		hsa-miR-145-5p	PHACTR2		hsa-miR-16-5p	XPO6		hsa-miR-19b-3p	ARRDC3		hsa-miR-20a-5p	C11orf30		hsa-miR-21-5p	C15orf52		hsa-miR-221-3p	NDUFS1		hsa-miR-222-3p	TRPS1		hsa-miR-23a-3p	PPP2R5E
COLEC12				hsa-let-7a-5p	SLC5A6		hsa-miR-100-5p	GNG5		hsa-miR-125b-5p	UBA6					hsa-miR-142-3p	HECTD1					hsa-miR-144-3p	SFXN4		hsa-miR-145-5p	KRT7		hsa-miR-16-5p	DMPK		hsa-miR-19b-3p	SLC37A1		hsa-miR-20a-5p	ZYG11A		hsa-miR-21-5p	PDCD4		hsa-miR-221-3p	MAP3K2		hsa-miR-222-3p	MESDC2		hsa-miR-23a-3p	DOCK4
RPS4X				hsa-let-7a-5p	HRAS		hsa-miR-100-5p	PIKFYVE		hsa-miR-125b-5p	DGAT1					hsa-miR-142-3p	EIF5					hsa-miR-144-3p	TSPAN6		hsa-miR-145-5p	RRAGC		hsa-miR-16-5p	ITPR1		hsa-miR-19b-3p	HIST2H4A		hsa-miR-20a-5p	ZNF398		hsa-miR-21-5p	SREK1		hsa-miR-221-3p	CDKN1B		hsa-miR-222-3p	TOP3A		hsa-miR-23a-3p	SLC35G3
ZNF629				hsa-let-7a-5p	PCGF3		hsa-miR-100-5p	SEPT10		hsa-miR-125b-5p	TP53INP1					hsa-miR-142-3p	CSRP2					hsa-miR-144-3p	RBM8A		hsa-miR-145-5p	ALDH3A1		hsa-miR-16-5p	LSG1		hsa-miR-19b-3p	BEND3		hsa-miR-20a-5p	CAMTA1		hsa-miR-21-5p	PFKFB2		hsa-miR-221-3p	EIF4G3		hsa-miR-222-3p	DICER1		hsa-miR-23a-3p	NOL11
ZNF443				hsa-let-7a-5p	SLC38A7					hsa-miR-125b-5p	MAPK14					hsa-miR-142-3p	SLC7A9					hsa-miR-144-3p	NT5C3A		hsa-miR-145-5p	EID2B		hsa-miR-16-5p	HSPA4L		hsa-miR-19b-3p	SNAPIN		hsa-miR-20a-5p	EPS15L1		hsa-miR-21-5p	CDC25A		hsa-miR-221-3p	UBN2		hsa-miR-222-3p	EIF2S1		hsa-miR-23a-3p	ZNF253
IGF1R				hsa-let-7a-5p	GTF3C1					hsa-miR-125b-5p	BCL2L13					hsa-miR-142-3p	FAM98A					hsa-miR-144-3p	CADM1		hsa-miR-145-5p	TGFBI		hsa-miR-16-5p	SELRC1		hsa-miR-19b-3p	TMBIM6		hsa-miR-20a-5p	SMIM13		hsa-miR-21-5p	SLK		hsa-miR-221-3p	HNRNPD		hsa-miR-222-3p	OLA1		hsa-miR-23a-3p	PKM
ZFAND4				hsa-let-7a-5p	KIAA0391					hsa-miR-125b-5p	GOLGA1					hsa-miR-142-3p	PUM1					hsa-miR-144-3p	MET		hsa-miR-145-5p	FLI1		hsa-miR-16-5p	AMOT		hsa-miR-19b-3p	PTBP2		hsa-miR-20a-5p	BMPR2		hsa-miR-21-5p	FAM3C		hsa-miR-221-3p	ANKRD28		hsa-miR-222-3p	DARS2		hsa-miR-23a-3p	UQCRFS1
ATP6V1F				hsa-let-7a-5p	PTGES2					hsa-miR-125b-5p	HSPD1					hsa-miR-142-3p	ZFX					hsa-miR-144-3p	ANKRD11		hsa-miR-145-5p	ABCC1		hsa-miR-16-5p	DNAJC10		hsa-miR-19b-3p	SOCS3		hsa-miR-20a-5p	EIF4H		hsa-miR-21-5p	GLG1		hsa-miR-221-3p	OIP5		hsa-miR-222-3p	CDKN1B		hsa-miR-23a-3p	RNMT
QKI				hsa-let-7a-5p	KLHDC8B					hsa-miR-125b-5p	SMYD5					hsa-miR-142-3p	AKT1S1					hsa-miR-144-3p	APP		hsa-miR-145-5p	ZFYVE9		hsa-miR-16-5p	CKAP5		hsa-miR-19b-3p	HBP1		hsa-miR-20a-5p	GPAM		hsa-miR-21-5p	FGFRL1		hsa-miR-221-3p	BBC3		hsa-miR-222-3p	MROH8		hsa-miR-23a-3p	ZNF117
HDAC5				hsa-let-7a-5p	MTUS1					hsa-miR-125b-5p	SAMD10					hsa-miR-142-3p	FBXO3					hsa-miR-144-3p	APPBP2		hsa-miR-145-5p	ABHD17C		hsa-miR-16-5p	SETD1B		hsa-miR-19b-3p	ZNF800		hsa-miR-20a-5p	RABGAP1L		hsa-miR-21-5p	VASH2		hsa-miR-221-3p	KIT		hsa-miR-222-3p	MDM2		hsa-miR-23a-3p	MRPS34
NAA35				hsa-let-7a-5p	ATG4C					hsa-miR-125b-5p	CD244					hsa-miR-142-3p	ARHGAP12					hsa-miR-144-3p	LCOR		hsa-miR-145-5p	IRS1		hsa-miR-16-5p	RARS		hsa-miR-19b-3p	G3BP2		hsa-miR-20a-5p	BNIP2		hsa-miR-21-5p	PKNOX1		hsa-miR-221-3p	TFAP2A		hsa-miR-222-3p	ATF5		hsa-miR-23a-3p	SSR1
TUSC2				hsa-let-7a-5p	IGDCC4					hsa-miR-125b-5p	ACSS1					hsa-miR-142-3p	MPLKIP					hsa-miR-144-3p	KIAA1462		hsa-miR-145-5p	CLINT1		hsa-miR-16-5p	FBXW11		hsa-miR-19b-3p	SOCS1		hsa-miR-20a-5p	COIL		hsa-miR-21-5p	ZNF460		hsa-miR-221-3p	PHF21A		hsa-miR-222-3p	FAM214A		hsa-miR-23a-3p	POU4F2
TNFRSF10B				hsa-let-7a-5p	UPP2					hsa-miR-125b-5p	MTMR4					hsa-miR-142-3p	ARNTL					hsa-miR-144-3p	HIST1H3B		hsa-miR-145-5p	CTNND1		hsa-miR-16-5p	LRRFIP2		hsa-miR-19b-3p	RNF111		hsa-miR-20a-5p	KMT2B		hsa-miR-21-5p	SACM1L		hsa-miR-221-3p	TMED7		hsa-miR-222-3p	PTEN		hsa-miR-23a-3p	ZNF704
SAR1A				hsa-let-7a-5p	RRM2					hsa-miR-125b-5p	SMIM8					hsa-miR-142-3p	SLC37A3					hsa-miR-144-3p	TGFB1		hsa-miR-145-5p	SRGAP1		hsa-miR-16-5p	CDK17		hsa-miR-19b-3p	MACF1		hsa-miR-20a-5p	REEP5		hsa-miR-21-5p	PTEN		hsa-miR-221-3p	CCT3		hsa-miR-222-3p	PAIP2		hsa-miR-23a-3p	FASTKD1
NPTX1				hsa-let-7a-5p	DIABLO					hsa-miR-125b-5p	SCNN1A					hsa-miR-142-3p	ARL15					hsa-miR-144-3p	LSM14A		hsa-miR-145-5p	UBR7		hsa-miR-16-5p	CASK		hsa-miR-19b-3p	CASZ1		hsa-miR-20a-5p	PIWIL2		hsa-miR-21-5p	ZRANB1		hsa-miR-221-3p	FAM84A		hsa-miR-222-3p	RPS2		hsa-miR-23a-3p	GMPS
HSF2				hsa-let-7a-5p	QDPR					hsa-miR-125b-5p	STAT3					hsa-miR-142-3p	RAB30					hsa-miR-144-3p	APPBP2		hsa-miR-145-5p	ITGB8		hsa-miR-16-5p	TBPL1		hsa-miR-19b-3p	KPNA6		hsa-miR-20a-5p	MORF4L1		hsa-miR-21-5p	FMOD		hsa-miR-221-3p	RAB1A		hsa-miR-222-3p	NCKAP5L		hsa-miR-23a-3p	ZNF281
ORAI2				hsa-let-7a-5p	DSC3					hsa-miR-125b-5p	TP53					hsa-miR-142-3p	KRTAP4-5					hsa-miR-144-3p	PEX5L		hsa-miR-145-5p	ROCK1		hsa-miR-16-5p	NOP14		hsa-miR-19b-3p	SLC12A7		hsa-miR-20a-5p	TFAM		hsa-miR-21-5p	VEGFA		hsa-miR-221-3p	SPAG5		hsa-miR-222-3p	PPP2R2A		hsa-miR-23a-3p	PPIC
FZD9				hsa-let-7a-5p	WIPI2					hsa-miR-125b-5p	OPRL1					hsa-miR-142-3p	PPIL4					hsa-miR-144-3p	GNG12		hsa-miR-145-5p	MEST		hsa-miR-16-5p	AP2A1		hsa-miR-19b-3p	ACPL2		hsa-miR-20a-5p	MAP3K2		hsa-miR-21-5p	TRIM38		hsa-miR-221-3p	NOP58		hsa-miR-222-3p	ZNF236		hsa-miR-23a-3p	FOXR2
E2F1				hsa-let-7a-5p	RRM2					hsa-miR-125b-5p	ERBB3					hsa-miR-142-3p	APC					hsa-miR-144-3p	RBM8A		hsa-miR-145-5p	UNC5D		hsa-miR-16-5p	VEGFA		hsa-miR-19b-3p	HIC1		hsa-miR-20a-5p	ZNF597		hsa-miR-21-5p	CCNG1		hsa-miR-221-3p	SMC2		hsa-miR-222-3p	SNX4		hsa-miR-23a-3p	MPP6
SYNPR				hsa-let-7a-5p	TMTC3					hsa-miR-125b-5p	ETF1					hsa-miR-142-3p	CSNK1G3					hsa-miR-144-3p	LIFR		hsa-miR-145-5p	SNX24		hsa-miR-16-5p	CD2AP		hsa-miR-19b-3p	CEP55		hsa-miR-20a-5p	CYCS		hsa-miR-21-5p	WWC2		hsa-miR-221-3p	ARHGAP42		hsa-miR-222-3p	C12orf65		hsa-miR-23a-3p	FAM91A1
ZC3HAV1L				hsa-let-7a-5p	ANKRD17					hsa-miR-125b-5p	HNRNPK					hsa-miR-142-3p	WASL								hsa-miR-145-5p	NDUFA4		hsa-miR-16-5p	GABPA		hsa-miR-19b-3p	COX10		hsa-miR-20a-5p	SNAP47		hsa-miR-21-5p	SRPK2		hsa-miR-221-3p	TUB		hsa-miR-222-3p	PCBP2		hsa-miR-23a-3p	SSR1
LIN28A				hsa-let-7a-5p	HIST2H2BE					hsa-miR-125b-5p	ZSWIM6					hsa-miR-142-3p	LYRM4								hsa-miR-145-5p	SLC26A2		hsa-miR-16-5p	WT1		hsa-miR-19b-3p	ZMYND11		hsa-miR-20a-5p	DDX5		hsa-miR-21-5p	ERP44		hsa-miR-221-3p	UNC13B		hsa-miR-222-3p	COIL		hsa-miR-23a-3p	ARL6IP1
AK4				hsa-let-7a-5p	PDE12					hsa-miR-125b-5p	MAN1B1					hsa-miR-142-3p	CLDN12								hsa-miR-145-5p	MYRF		hsa-miR-16-5p	NOL11		hsa-miR-19b-3p	ATP6V1B2		hsa-miR-20a-5p	FOXK2		hsa-miR-21-5p	PBRM1		hsa-miR-221-3p	CDKN1B		hsa-miR-222-3p	PKP2		hsa-miR-23a-3p	DSTN
PDE4DIP				hsa-let-7a-5p	INTS12					hsa-miR-125b-5p	HMGA2					hsa-miR-142-3p	YWHAH								hsa-miR-145-5p	KLF5		hsa-miR-16-5p	BFAR		hsa-miR-19b-3p	ZNF772		hsa-miR-20a-5p	SOCS7		hsa-miR-21-5p	PHF16		hsa-miR-221-3p	PCDHA8		hsa-miR-222-3p	UBE2N		hsa-miR-23a-3p	ADD3
MCF2L2				hsa-let-7a-5p	ZNF460					hsa-miR-125b-5p	PCBP2					hsa-miR-142-3p	PCDHGA10								hsa-miR-145-5p	NRAS		hsa-miR-16-5p	SCAMP5		hsa-miR-19b-3p	SBF2		hsa-miR-20a-5p	DNAJB9		hsa-miR-21-5p	RDH11		hsa-miR-221-3p	AP2A1		hsa-miR-222-3p	CLDN23		hsa-miR-23a-3p	KIAA1551
PCIF1				hsa-let-7a-5p	SEMA4C					hsa-miR-125b-5p	STOX2					hsa-miR-142-3p	IL6ST								hsa-miR-145-5p	P4HA1		hsa-miR-16-5p	USP53		hsa-miR-19b-3p	RAN		hsa-miR-20a-5p	AKAP11		hsa-miR-21-5p	E2F2		hsa-miR-221-3p	USP18		hsa-miR-222-3p	RPS17		hsa-miR-23a-3p	ZNF138
EZH2				hsa-let-7a-5p	WDR46					hsa-miR-125b-5p	CCDC124					hsa-miR-142-3p	PRPF38B											hsa-miR-16-5p	TOB2		hsa-miR-19b-3p	CCDC80		hsa-miR-20a-5p	LRP12		hsa-miR-21-5p	EDIL3		hsa-miR-221-3p	NHSL1		hsa-miR-222-3p	VGLL4		hsa-miR-23a-3p	MYH1
PLCG2				hsa-let-7a-5p	EDN1					hsa-miR-125b-5p	GOLGA8B					hsa-miR-142-3p	TNPO1											hsa-miR-16-5p	WNT4		hsa-miR-19b-3p	UBN2		hsa-miR-20a-5p	KLHL28		hsa-miR-21-5p	WNK3		hsa-miR-221-3p	CABYR		hsa-miR-222-3p	VANGL1
IPO7				hsa-let-7a-5p	ABHD17C					hsa-miR-125b-5p	BAK1					hsa-miR-142-3p	RAD51											hsa-miR-16-5p	SNX6		hsa-miR-19b-3p	ABHD17C		hsa-miR-20a-5p	SAMD8		hsa-miR-21-5p	PBX1		hsa-miR-221-3p	UBC		hsa-miR-222-3p	HIPK2
NHLRC2				hsa-let-7a-5p	TRAF7					hsa-miR-125b-5p	GOLGA8A					hsa-miR-142-3p	VAPB											hsa-miR-16-5p	POLR2A		hsa-miR-19b-3p	NFIA		hsa-miR-20a-5p	ARAP2		hsa-miR-21-5p	DOCK10		hsa-miR-221-3p	RAD51		hsa-miR-222-3p	TCERG1
CDC7				hsa-let-7a-5p	ZNF566					hsa-miR-125b-5p	SIX1					hsa-miR-142-3p	MORF4L1											hsa-miR-16-5p	MAP7		hsa-miR-19b-3p	LTN1		hsa-miR-20a-5p	SLC6A4		hsa-miR-21-5p	NFKB1		hsa-miR-221-3p	CDKN1B		hsa-miR-222-3p	PDIK1L
NIPBL				hsa-let-7a-5p	TRIM5					hsa-miR-125b-5p	RPL3					hsa-miR-142-3p	CLUAP1											hsa-miR-16-5p	ATXN2L		hsa-miR-19b-3p	ENPP4		hsa-miR-20a-5p	TMEM66		hsa-miR-21-5p	HIPK3		hsa-miR-221-3p	UBE2N		hsa-miR-222-3p	EIF3I
SESN1				hsa-let-7a-5p	NOA1					hsa-miR-125b-5p	SNRPB					hsa-miR-142-3p	IL6ST											hsa-miR-16-5p	RUNX1T1		hsa-miR-19b-3p	FBXO48		hsa-miR-20a-5p	TBC1D17		hsa-miR-21-5p	PTEN		hsa-miR-221-3p	CERS2		hsa-miR-222-3p	FPGS
THYN1				hsa-let-7a-5p	ZNF587					hsa-miR-125b-5p	BCL2					hsa-miR-142-3p	WASL											hsa-miR-16-5p	EEF1G		hsa-miR-19b-3p	ZMYM2		hsa-miR-20a-5p	TSKU		hsa-miR-21-5p	ELOVL4		hsa-miR-221-3p	TMEM183A		hsa-miR-222-3p	MORF4L1
CD55				hsa-let-7a-5p	RPL35A					hsa-miR-125b-5p	RGS19					hsa-miR-142-3p	ACBD5											hsa-miR-16-5p	KANSL3		hsa-miR-19b-3p	RAP1B		hsa-miR-20a-5p	FMNL3		hsa-miR-21-5p	ARID4A		hsa-miR-221-3p	KPNA2		hsa-miR-222-3p	CDKL5
DNAJC6				hsa-let-7a-5p	SEMA4C					hsa-miR-125b-5p	NUP37					hsa-miR-142-3p	GFI1											hsa-miR-16-5p	GTF3C1		hsa-miR-19b-3p	RAF1		hsa-miR-20a-5p	DDI2		hsa-miR-21-5p	PITHD1		hsa-miR-221-3p	PANK3		hsa-miR-222-3p	ATP11B
LIMD2				hsa-let-7a-5p	COLEC12					hsa-miR-125b-5p	TMEM59					hsa-miR-142-3p	RRM2B											hsa-miR-16-5p	SOWAHC		hsa-miR-19b-3p	PPP1R15B		hsa-miR-20a-5p	E2F1		hsa-miR-21-5p	PTEN		hsa-miR-221-3p	DIRAS3		hsa-miR-222-3p	BBC3
THEM6				hsa-let-7a-5p	ZNF644					hsa-miR-125b-5p	IRS4					hsa-miR-142-3p	COPA											hsa-miR-16-5p	MLLT1		hsa-miR-19b-3p	DEF8		hsa-miR-20a-5p	INSIG1		hsa-miR-21-5p	PDCD4		hsa-miR-221-3p	TSC22D2		hsa-miR-222-3p	ALG3
FNIP1				hsa-let-7a-5p	RPS4X					hsa-miR-125b-5p	CMTM4					hsa-miR-142-3p	RPS19											hsa-miR-16-5p	ACTN4		hsa-miR-19b-3p	CREBRF		hsa-miR-20a-5p	ICA1L		hsa-miR-21-5p	FAM217B		hsa-miR-221-3p	TP53		hsa-miR-222-3p	LYPLA1
ARID3B				hsa-let-7a-5p	ABT1					hsa-miR-125b-5p	EIF5					hsa-miR-142-3p	ZFPM1											hsa-miR-16-5p	TTLL5		hsa-miR-19b-3p	TMBIM6		hsa-miR-20a-5p	ETV1		hsa-miR-21-5p	LARS		hsa-miR-221-3p	YY1		hsa-miR-222-3p	KIT
NPC1				hsa-let-7a-5p	ZNF629					hsa-miR-125b-5p	BMPR1B					hsa-miR-142-3p	TBRG1											hsa-miR-16-5p	LRPPRC		hsa-miR-19b-3p	ARL8A		hsa-miR-20a-5p	SPOPL		hsa-miR-21-5p	CERS6		hsa-miR-221-3p	ZNF236		hsa-miR-222-3p	COL5A2
SIK1				hsa-let-7a-5p	ZNF443					hsa-miR-125b-5p	QSOX2					hsa-miR-142-3p	MMGT1											hsa-miR-16-5p	DNAJB1		hsa-miR-19b-3p	SOX4		hsa-miR-20a-5p	ZDHHC20		hsa-miR-21-5p	PPM1L		hsa-miR-221-3p	SNX4		hsa-miR-222-3p	PRRC2A
ADH5				hsa-let-7a-5p	IGF1R					hsa-miR-125b-5p	MXD1					hsa-miR-142-3p	RAB2A											hsa-miR-16-5p	SLC11A2		hsa-miR-19b-3p	LDLR		hsa-miR-20a-5p	BTF3L4		hsa-miR-21-5p	JAG1		hsa-miR-221-3p	MDM2		hsa-miR-222-3p	CDK18
CEP120				hsa-let-7a-5p	HMGA2					hsa-miR-125b-5p	USP8					hsa-miR-142-3p	KIF5A											hsa-miR-16-5p	CHIC1		hsa-miR-19b-3p	KATNAL1		hsa-miR-20a-5p	GATA6		hsa-miR-21-5p	CCL20		hsa-miR-221-3p	TNKS2		hsa-miR-222-3p	SRRT
BACH1				hsa-let-7a-5p	ZFAND4					hsa-miR-125b-5p	PLXDC1					hsa-miR-142-3p	AFF4											hsa-miR-16-5p	HRSP12		hsa-miR-19b-3p	RAB5B		hsa-miR-20a-5p	VTI1A		hsa-miR-21-5p	ACBD5		hsa-miR-221-3p	TUBA1C		hsa-miR-222-3p	CANX
BRI3BP				hsa-let-7a-5p	ATP6V1F					hsa-miR-125b-5p	ABCC1					hsa-miR-142-3p	EDEM3											hsa-miR-16-5p	NUP50		hsa-miR-19b-3p	TGIF1		hsa-miR-20a-5p	SERF1A		hsa-miR-21-5p	PDHA2		hsa-miR-221-3p	MYLIP		hsa-miR-222-3p	UBR7
UBA6				hsa-let-7a-5p	QKI					hsa-miR-125b-5p	CEP170					hsa-miR-142-3p	IRF2BP1											hsa-miR-16-5p	TEX15		hsa-miR-19b-3p	CCND2		hsa-miR-20a-5p	FGFR1OP		hsa-miR-21-5p	MBNL1		hsa-miR-221-3p	ZNF652		hsa-miR-222-3p	OBFC1
MTFR1L				hsa-let-7a-5p	ESPL1					hsa-miR-125b-5p	ATXN1					hsa-miR-142-3p	SECISBP2											hsa-miR-16-5p	NAA15		hsa-miR-19b-3p	RAN		hsa-miR-20a-5p	BAMBI		hsa-miR-21-5p	PTPN14		hsa-miR-221-3p	ERC1		hsa-miR-222-3p	CDKN1B
SHMT2				hsa-let-7a-5p	HDAC5					hsa-miR-125b-5p	KLF13					hsa-miR-142-3p	CCNT2											hsa-miR-16-5p	SIDT2		hsa-miR-19b-3p	FAM195A		hsa-miR-20a-5p	CCNB1		hsa-miR-21-5p	HECTD1		hsa-miR-221-3p	PCDHAC1		hsa-miR-222-3p	CDKN1B
EWSR1				hsa-let-7a-5p	NAA35					hsa-miR-125b-5p	ERBB2					hsa-miR-142-3p	C4BPB											hsa-miR-16-5p	FAM103A1		hsa-miR-19b-3p	DCAF7		hsa-miR-20a-5p	IFNAR1		hsa-miR-21-5p	TGFBR2		hsa-miR-221-3p	KIF16B		hsa-miR-222-3p	FBXO21
SLC20A1				hsa-let-7a-5p	TUSC2					hsa-miR-125b-5p	TIMM10					hsa-miR-142-3p	LRRC32											hsa-miR-16-5p	WDR3		hsa-miR-19b-3p	SCD		hsa-miR-20a-5p	BNIP2		hsa-miR-21-5p	RPS7		hsa-miR-221-3p	VANGL1		hsa-miR-222-3p	TFAP2A
NKIRAS2				hsa-let-7a-5p	SLC10A7					hsa-miR-125b-5p	PLA2G4F					hsa-miR-142-3p	TWF1											hsa-miR-16-5p	CAMSAP3		hsa-miR-19b-3p	BTN2A2		hsa-miR-20a-5p	ZNF578		hsa-miR-21-5p	FAM20B		hsa-miR-221-3p	FMR1		hsa-miR-222-3p	AHSA1
DIS3L2				hsa-let-7a-5p	TNFRSF10B					hsa-miR-125b-5p	ZMYND11					hsa-miR-142-3p	SYPL1											hsa-miR-16-5p	TP53		hsa-miR-19b-3p	MPHOSPH9		hsa-miR-20a-5p	APOA1BP		hsa-miR-21-5p	PDGFD		hsa-miR-221-3p	ARIH2		hsa-miR-222-3p	HES1
MRPS2				hsa-let-7a-5p	SAR1A					hsa-miR-125b-5p	HMGA1					hsa-miR-142-3p	MORF4L1											hsa-miR-16-5p	CNKSR3		hsa-miR-19b-3p	ATMIN		hsa-miR-20a-5p	ZNF202		hsa-miR-21-5p	RPS7		hsa-miR-221-3p	HIVEP1		hsa-miR-222-3p	SSH2
CEP135				hsa-let-7a-5p	NPTX1					hsa-miR-125b-5p	HK2					hsa-miR-142-3p	GINS2											hsa-miR-16-5p	PSPH		hsa-miR-19b-3p	ZFYVE26		hsa-miR-20a-5p	LIAS		hsa-miR-21-5p	FILIP1L		hsa-miR-221-3p	MFN2		hsa-miR-222-3p	DOCK5
ECHDC1				hsa-let-7a-5p	HSF2					hsa-miR-125b-5p	SDHB					hsa-miR-142-3p	SIGLEC10											hsa-miR-16-5p	CYP26B1		hsa-miR-19b-3p	DYNLL2		hsa-miR-20a-5p	NR2C2		hsa-miR-21-5p	PDCD4		hsa-miR-221-3p	UQCR10		hsa-miR-222-3p	DBNL
CCND1				hsa-let-7a-5p	ORAI2					hsa-miR-125b-5p	RPS6KA1					hsa-miR-142-3p	YWHAH											hsa-miR-16-5p	SLC30A1		hsa-miR-19b-3p	AP2B1		hsa-miR-20a-5p	C11orf54		hsa-miR-21-5p	SMAD7		hsa-miR-221-3p	ADD1		hsa-miR-222-3p	FBXL18
FAM171A2				hsa-let-7a-5p	FZD9					hsa-miR-125b-5p	RPS7					hsa-miR-142-3p	SPPL3											hsa-miR-16-5p	AQP12B		hsa-miR-19b-3p	C5orf51		hsa-miR-20a-5p	KIF23		hsa-miR-21-5p	CEP152		hsa-miR-221-3p	ELAVL2		hsa-miR-222-3p	GANAB
SUOX				hsa-let-7a-5p	E2F1					hsa-miR-125b-5p	BAK1					hsa-miR-142-3p	FZD7											hsa-miR-16-5p	VEGFA		hsa-miR-19b-3p	CEP350		hsa-miR-20a-5p	KLHL36		hsa-miR-21-5p	PDCD4		hsa-miR-221-3p	LDHB		hsa-miR-222-3p	ZFP30
WWP2				hsa-let-7a-5p	SYNPR					hsa-miR-125b-5p	REST					hsa-miR-142-3p	ZCCHC14											hsa-miR-16-5p	KIF2A		hsa-miR-19b-3p	CREBL2		hsa-miR-20a-5p	XIRP2		hsa-miR-21-5p	FGF12		hsa-miR-221-3p	KIT		hsa-miR-222-3p	TATDN2
ATP6V1B2				hsa-let-7a-5p	ZC3HAV1L					hsa-miR-125b-5p	AURKB					hsa-miR-142-3p	ATXN3											hsa-miR-16-5p	DIEXF		hsa-miR-19b-3p	STK38		hsa-miR-20a-5p	TMEM67		hsa-miR-21-5p	RAB11FIP2		hsa-miR-221-3p	ZKSCAN8		hsa-miR-222-3p	SETD1B
SEL1L3				hsa-let-7a-5p	C11orf57					hsa-miR-125b-5p	SMAD4					hsa-miR-142-3p	ENAH											hsa-miR-16-5p	HARS		hsa-miR-19b-3p	ADSS		hsa-miR-20a-5p	WDR37		hsa-miR-21-5p	NFIA		hsa-miR-221-3p	PKM		hsa-miR-222-3p	CERS2
UBOX5				hsa-let-7a-5p	LIN28A					hsa-miR-125b-5p	LBX2					hsa-miR-142-3p	BTG2											hsa-miR-16-5p	DHTKD1		hsa-miR-19b-3p	PAICS		hsa-miR-20a-5p	PHTF2		hsa-miR-21-5p	EIF4A2		hsa-miR-221-3p	PLP2		hsa-miR-222-3p	THOP1
CFL2				hsa-let-7a-5p	AK4					hsa-miR-125b-5p	ARID3B					hsa-miR-142-3p	FAM208B											hsa-miR-16-5p	C11orf24		hsa-miR-19b-3p	PURG		hsa-miR-20a-5p	GJA1		hsa-miR-21-5p	ATAD2B		hsa-miR-221-3p	OBFC1		hsa-miR-222-3p	PTDSS2
SMARCAD1				hsa-let-7a-5p	PDE4DIP					hsa-miR-125b-5p	HSPA1B					hsa-miR-142-3p	SUCO											hsa-miR-16-5p	SPRED1		hsa-miR-19b-3p	SON		hsa-miR-20a-5p	YOD1		hsa-miR-21-5p	MON2		hsa-miR-221-3p	SGTA		hsa-miR-222-3p	TIPARP
CALU				hsa-let-7a-5p	MCF2L2					hsa-miR-125b-5p	BTG2					hsa-miR-142-3p	FZD7											hsa-miR-16-5p	LRPPRC		hsa-miR-19b-3p	MTMR12		hsa-miR-20a-5p	EIF4H		hsa-miR-21-5p	TGFBR2		hsa-miR-221-3p	DDAH1		hsa-miR-222-3p	FAM83G
GLO1				hsa-let-7a-5p	PCIF1					hsa-miR-125b-5p	TET2					hsa-miR-142-3p	UBE2W											hsa-miR-16-5p	BTG2		hsa-miR-19b-3p	RNF11		hsa-miR-20a-5p	CABLES1		hsa-miR-21-5p	MMP9		hsa-miR-221-3p	CDKN1B		hsa-miR-222-3p	KPNA2
CCNG1				hsa-let-7a-5p	EZH2					hsa-miR-125b-5p	NRD1					hsa-miR-142-3p	PPP1R14C											hsa-miR-16-5p	CREBRF		hsa-miR-19b-3p	LPGAT1		hsa-miR-20a-5p	YBX1		hsa-miR-21-5p	DDR2		hsa-miR-221-3p	EIF2AK1		hsa-miR-222-3p	TRAT1
STK4				hsa-let-7a-5p	PLCG2					hsa-miR-125b-5p	YOD1					hsa-miR-142-3p	ACBD3											hsa-miR-16-5p	HDGF		hsa-miR-19b-3p	TGFB1		hsa-miR-20a-5p	FBXL5		hsa-miR-21-5p	MEGF9		hsa-miR-221-3p	SF3B3		hsa-miR-222-3p	LRP10
RNF44				hsa-let-7a-5p	IPO7					hsa-miR-125b-5p	ARIH2					hsa-miR-142-3p	ACSL4											hsa-miR-16-5p	SLC35B3		hsa-miR-19b-3p	ATP6V1B2		hsa-miR-20a-5p	CRISPLD2		hsa-miR-21-5p	VASH2		hsa-miR-221-3p	PCDHAC2		hsa-miR-222-3p	PPRC1
TRRAP				hsa-let-7a-5p	NHLRC2					hsa-miR-125b-5p	EPHA7					hsa-miR-142-3p	DNAJB4											hsa-miR-16-5p	SPATA5		hsa-miR-19b-3p	IKZF1		hsa-miR-20a-5p	MFSD2A		hsa-miR-21-5p	TSHZ3		hsa-miR-221-3p	SEPHS1		hsa-miR-222-3p	DIRAS3
PNRC1				hsa-let-7a-5p	GRPEL2					hsa-miR-125b-5p	DHX57					hsa-miR-142-3p	KCND3											hsa-miR-16-5p	TFAP2A		hsa-miR-19b-3p	CNOT6		hsa-miR-20a-5p	DNAJB9		hsa-miR-21-5p	PARP9		hsa-miR-221-3p	BBC3		hsa-miR-222-3p	TP53
GLUL				hsa-let-7a-5p	CDC7					hsa-miR-125b-5p	LINS					hsa-miR-142-3p	YWHAE											hsa-miR-16-5p	SALL1		hsa-miR-19b-3p	KLHL11		hsa-miR-20a-5p	PITPNA		hsa-miR-21-5p	ELOVL7		hsa-miR-221-3p	MAT2A		hsa-miR-222-3p	PTEN
LEFTY1				hsa-let-7a-5p	NIPBL					hsa-miR-125b-5p	SLC7A6					hsa-miR-142-3p	ROCK2											hsa-miR-16-5p	GOSR1		hsa-miR-19b-3p	TBRG1		hsa-miR-20a-5p	CRK		hsa-miR-21-5p	MGA		hsa-miR-221-3p	WDR61		hsa-miR-222-3p	PIP5K1A
PAFAH2				hsa-let-7a-5p	SESN1					hsa-miR-125b-5p	FUS					hsa-miR-142-3p	KIAA1191											hsa-miR-16-5p	PLRG1		hsa-miR-19b-3p	CAMSAP1		hsa-miR-20a-5p	PARD3		hsa-miR-21-5p	E2F1		hsa-miR-221-3p	ARHGAP42		hsa-miR-222-3p	XPO6
ATP2B1				hsa-let-7a-5p	THYN1					hsa-miR-125b-5p	RAB4A					hsa-miR-142-3p	MTUS1											hsa-miR-16-5p	TGOLN2		hsa-miR-19b-3p	GIT2		hsa-miR-20a-5p	FBL		hsa-miR-21-5p	DTX3L		hsa-miR-221-3p	FBXL18		hsa-miR-222-3p	SAPCD2
SALL3				hsa-let-7a-5p	CD55					hsa-miR-125b-5p	ANKRD33B					hsa-miR-142-3p	INTS7											hsa-miR-16-5p	MRPS35		hsa-miR-19b-3p	ZNF154		hsa-miR-20a-5p	TMEM242		hsa-miR-21-5p	OSBPL3		hsa-miR-221-3p	HECTD1		hsa-miR-222-3p	BCL2L11
ITM2B				hsa-let-7a-5p	DNAJC6					hsa-miR-125b-5p	NDC1					hsa-miR-142-3p	H3F3C											hsa-miR-16-5p	ITGA2		hsa-miR-19b-3p	STOX2		hsa-miR-20a-5p	PFKFB2		hsa-miR-21-5p	RNF185		hsa-miR-221-3p	ZFP30		hsa-miR-222-3p	MYLIP
HIST1H1D				hsa-let-7a-5p	TRIM71					hsa-miR-125b-5p	TP53					hsa-miR-142-3p	ZNF608											hsa-miR-16-5p	CBFA2T3		hsa-miR-19b-3p	B4GALT1		hsa-miR-20a-5p	ACVR1B		hsa-miR-21-5p	DMD		hsa-miR-221-3p	CDKN1B		hsa-miR-222-3p	CDKN1B
C19orf47				hsa-let-7a-5p	LIMD2					hsa-miR-125b-5p	HID1					hsa-miR-142-3p	LPP											hsa-miR-16-5p	CAMSAP1		hsa-miR-19b-3p	VPS4B		hsa-miR-20a-5p	MAVS		hsa-miR-21-5p	FBXO3		hsa-miR-221-3p	LYN		hsa-miR-222-3p	SRRM2
OPRL1				hsa-let-7a-5p	THEM6					hsa-miR-125b-5p	SIK2					hsa-miR-142-3p	SUCO											hsa-miR-16-5p	EIF2B2		hsa-miR-19b-3p	HIST2H4B		hsa-miR-20a-5p	ZBTB9		hsa-miR-21-5p	TIAM1		hsa-miR-221-3p	ACSL3		hsa-miR-222-3p	PPP1R14C
ALDH7A1				hsa-let-7a-5p	ZNF611					hsa-miR-125b-5p	SEL1L					hsa-miR-142-3p	PNO1											hsa-miR-16-5p	TUBA1A		hsa-miR-19b-3p	LRP8		hsa-miR-20a-5p	RFXAP		hsa-miR-21-5p	PTEN		hsa-miR-221-3p	ZNF652		hsa-miR-222-3p	SLFN11
NUDT5				hsa-let-7a-5p	FNIP1					hsa-miR-125b-5p	MON1B					hsa-miR-142-3p	CLTA											hsa-miR-16-5p	PTGS2		hsa-miR-19b-3p	RBM38		hsa-miR-20a-5p	PCBP2		hsa-miR-21-5p	EPHA4		hsa-miR-221-3p	TRIM28		hsa-miR-222-3p	ABLIM1
FAM83G				hsa-let-7a-5p	ARID3B					hsa-miR-125b-5p	BMF					hsa-miR-142-3p	NFATC2IP											hsa-miR-16-5p	NUP160		hsa-miR-19b-3p	RAB21		hsa-miR-20a-5p	KATNAL1		hsa-miR-21-5p	ATP11B		hsa-miR-221-3p	STMN1		hsa-miR-222-3p	MGAT4B
GTF2I				hsa-let-7a-5p	NPC1					hsa-miR-125b-5p	RFWD3					hsa-miR-142-3p	TNPO1											hsa-miR-16-5p	TMEM255A		hsa-miR-19b-3p	SFTPA1		hsa-miR-20a-5p	NFATC2IP		hsa-miR-21-5p	FRS2		hsa-miR-221-3p	TRAT1		hsa-miR-222-3p	NKRF
NEFM				hsa-let-7a-5p	SIK1					hsa-miR-125b-5p	FAM60A					hsa-miR-142-3p	MRGPRX1											hsa-miR-16-5p	ATG9A		hsa-miR-19b-3p	HBP1		hsa-miR-20a-5p	FEM1C		hsa-miR-21-5p	PTEN		hsa-miR-221-3p	HNRNPA0		hsa-miR-222-3p	MIDN
DHX9				hsa-let-7a-5p	ADH5					hsa-miR-125b-5p	MAP3K2					hsa-miR-142-3p	LYRM4											hsa-miR-16-5p	APLNR		hsa-miR-19b-3p	ZMAT3		hsa-miR-20a-5p	HSPA8		hsa-miR-21-5p	COX20		hsa-miR-221-3p	DIRAS3		hsa-miR-222-3p	ZNF275
CELF1				hsa-let-7a-5p	CEP120					hsa-miR-125b-5p	EIF4EBP1					hsa-miR-142-3p	SIK2											hsa-miR-16-5p	IMPDH2		hsa-miR-19b-3p	JAZF1		hsa-miR-20a-5p	NETO2		hsa-miR-21-5p	SERPINB5		hsa-miR-221-3p	CENPT		hsa-miR-222-3p	POM121
ZBTB37				hsa-let-7a-5p	NOM1					hsa-miR-125b-5p	GOLGA8B					hsa-miR-142-3p	PTPN23											hsa-miR-16-5p	CAMKK2		hsa-miR-19b-3p	TBC1D13		hsa-miR-20a-5p	ANKS4B		hsa-miR-21-5p	ZBTB20		hsa-miR-221-3p	CORO1A		hsa-miR-222-3p	TLN1
CAND2				hsa-let-7a-5p	BACH1					hsa-miR-125b-5p	PSMB1					hsa-miR-142-3p	LCOR											hsa-miR-16-5p	PSAT1		hsa-miR-19b-3p	PAICS		hsa-miR-20a-5p	MRS2		hsa-miR-21-5p	PURG		hsa-miR-221-3p	PXN		hsa-miR-222-3p	PACS2
ZBTB5				hsa-let-7a-5p	BRI3BP					hsa-miR-125b-5p	BACH1					hsa-miR-142-3p	CYR61											hsa-miR-16-5p	MTOR		hsa-miR-19b-3p	HECW2		hsa-miR-20a-5p	BNIP2		hsa-miR-21-5p	FAXDC2		hsa-miR-221-3p	SAPCD2		hsa-miR-222-3p	USP9X
TGFBR3				hsa-let-7a-5p	SMC1A					hsa-miR-125b-5p	EDEM1					hsa-miR-142-3p	INPP5F											hsa-miR-16-5p	FASTKD1		hsa-miR-19b-3p	MAPRE3		hsa-miR-20a-5p	SMOC1		hsa-miR-21-5p	BCL2		hsa-miR-221-3p	CDKN1B		hsa-miR-222-3p	SAP30L
RPS15A				hsa-let-7a-5p	UBA6					hsa-miR-125b-5p	SLC9A3R2					hsa-miR-142-3p	TMEM136											hsa-miR-16-5p	UBE3C		hsa-miR-19b-3p	S1PR2		hsa-miR-20a-5p	ATG14		hsa-miR-21-5p	LRRFIP1		hsa-miR-221-3p	TMEM248		hsa-miR-222-3p	MDN1
MEPCE				hsa-let-7a-5p	FZD9					hsa-miR-125b-5p	ADM					hsa-miR-142-3p	PRPF38B											hsa-miR-16-5p	C2orf74		hsa-miR-19b-3p	TMEM106B		hsa-miR-20a-5p	GRPEL2		hsa-miR-21-5p	PDCD4		hsa-miR-221-3p	CDKN1B		hsa-miR-222-3p	EXOSC1
DISC1				hsa-let-7a-5p	MTFR1L					hsa-miR-125b-5p	THUMPD3					hsa-miR-142-3p	RNF38											hsa-miR-16-5p	VIM		hsa-miR-19b-3p	PPARA		hsa-miR-20a-5p	CRISPLD2		hsa-miR-21-5p	SNRNP48		hsa-miR-221-3p	PPP1R14C		hsa-miR-222-3p	TP53BP2
PALD1				hsa-let-7a-5p	SHMT2					hsa-miR-125b-5p	GLI1					hsa-miR-142-3p	OTUD4											hsa-miR-16-5p	ABHD2		hsa-miR-19b-3p	FZD6		hsa-miR-20a-5p	TCF7L2		hsa-miR-21-5p	SOD3		hsa-miR-221-3p	MIDN		hsa-miR-222-3p	APP
E2F2				hsa-let-7a-5p	EWSR1					hsa-miR-125b-5p	PLEKHG5					hsa-miR-142-3p	ATP2B1											hsa-miR-16-5p	ENPP4		hsa-miR-19b-3p	MBOAT7		hsa-miR-20a-5p	SLC30A1		hsa-miR-21-5p	ECI2		hsa-miR-221-3p	ABLIM1		hsa-miR-222-3p	DDX6
PEX14				hsa-let-7a-5p	SLC20A1					hsa-miR-125b-5p	ATP5B					hsa-miR-142-3p	ARL10											hsa-miR-16-5p	NOTCH2		hsa-miR-19b-3p	PNRC1		hsa-miR-20a-5p	ZFYVE26		hsa-miR-21-5p	TIMP3		hsa-miR-221-3p	TNIP1		hsa-miR-222-3p	DYRK3
ZMYM3				hsa-let-7a-5p	NKIRAS2					hsa-miR-125b-5p	LSS					hsa-miR-142-3p	ADPRHL1											hsa-miR-16-5p	DLD		hsa-miR-19b-3p	FBXO10		hsa-miR-20a-5p	HYPK		hsa-miR-21-5p	UGGT1		hsa-miR-221-3p	GATAD2B		hsa-miR-222-3p	MACF1
BCAT1				hsa-let-7a-5p	DIS3L2					hsa-miR-125b-5p	HKR1					hsa-miR-142-3p	DPY19L4											hsa-miR-16-5p	PRPSAP1		hsa-miR-19b-3p	GMEB2		hsa-miR-20a-5p	DUSP2		hsa-miR-21-5p	NCAPG		hsa-miR-221-3p	PAIP2		hsa-miR-222-3p	TOM1
RAVER2				hsa-let-7a-5p	CDKN1A					hsa-miR-125b-5p	IRF4					hsa-miR-142-3p	ACSL1											hsa-miR-16-5p	CREBL2		hsa-miR-19b-3p	FBXO28		hsa-miR-20a-5p	RBM12B		hsa-miR-21-5p	PAG1		hsa-miR-221-3p	PCDHA10		hsa-miR-222-3p	JTB
ARRDC3				hsa-let-7a-5p	MRPS2					hsa-miR-125b-5p	RNF144A					hsa-miR-142-3p	MANBAL											hsa-miR-16-5p	RPRD2		hsa-miR-19b-3p	RNF167		hsa-miR-20a-5p	FAF2		hsa-miR-21-5p	PAG1		hsa-miR-221-3p	KPNA6		hsa-miR-222-3p	C8orf33
FBXL20				hsa-let-7a-5p	CEP135					hsa-miR-125b-5p	MUC1					hsa-miR-142-3p	CNIH4											hsa-miR-16-5p	RHOF		hsa-miR-19b-3p	ELL2		hsa-miR-20a-5p	CEP120		hsa-miR-21-5p	PDCD4		hsa-miR-221-3p	HMGXB4		hsa-miR-222-3p	AUTS2
SETD7				hsa-let-7a-5p	ECHDC1					hsa-miR-125b-5p	PAM					hsa-miR-142-3p	YOD1											hsa-miR-16-5p	SLMO2		hsa-miR-19b-3p	SLC38A2		hsa-miR-20a-5p	FXYD5		hsa-miR-21-5p	ARMCX3		hsa-miR-221-3p	SIRT1		hsa-miR-222-3p	CSTF2T
HIST1H4D				hsa-let-7a-5p	CCND1					hsa-miR-125b-5p	PPP2CA					hsa-miR-142-3p	PDSS2											hsa-miR-16-5p	RPL3		hsa-miR-19b-3p	ATMIN		hsa-miR-20a-5p	KRT10		hsa-miR-21-5p	COBLL1		hsa-miR-221-3p	GJA1		hsa-miR-222-3p	CDKN1B
MRPL12				hsa-let-7a-5p	FAM171A2					hsa-miR-125b-5p	TDG					hsa-miR-142-3p	MESP2											hsa-miR-16-5p	IVNS1ABP		hsa-miR-19b-3p	TMEM117		hsa-miR-20a-5p	GOLGA1		hsa-miR-21-5p	PDCD4		hsa-miR-221-3p	TRPC3		hsa-miR-222-3p	CIAPIN1
TAF5				hsa-let-7a-5p	SUOX					hsa-miR-125b-5p	SLC35G1					hsa-miR-142-3p	XIAP											hsa-miR-16-5p	MMS19		hsa-miR-19b-3p	ARHGAP12		hsa-miR-20a-5p	CNOT6L		hsa-miR-21-5p	PELI1		hsa-miR-221-3p	DDX3Y		hsa-miR-222-3p	FAM126B
RNFT1				hsa-let-7a-5p	WWP2					hsa-miR-125b-5p	HMGN1					hsa-miR-142-3p	TMEM209											hsa-miR-16-5p	CLIP2		hsa-miR-19b-3p	NACC2		hsa-miR-20a-5p	C3orf38		hsa-miR-21-5p	BMPR2		hsa-miR-221-3p	FUS		hsa-miR-222-3p	PFN1
ATP6V1G1				hsa-let-7a-5p	HMGA2					hsa-miR-125b-5p	KCNS3					hsa-miR-142-3p	C11orf74											hsa-miR-16-5p	PDIA6		hsa-miR-19b-3p	BLCAP		hsa-miR-20a-5p	RGS5		hsa-miR-21-5p	HMGB3		hsa-miR-221-3p	ARHGAP42		hsa-miR-222-3p	SMC6
EIF4G2				hsa-let-7a-5p	ATP6V1B2					hsa-miR-125b-5p	CASC3					hsa-miR-142-3p	HSPA1B											hsa-miR-16-5p	FAM229B		hsa-miR-19b-3p	PPTC7		hsa-miR-20a-5p	RBBP7		hsa-miR-21-5p	PURB		hsa-miR-221-3p	RNF4		hsa-miR-222-3p	CDK6
RPS13				hsa-let-7a-5p	ARID3B					hsa-miR-125b-5p	GOLGA8A					hsa-miR-142-3p	CLIC4											hsa-miR-16-5p	BCL2		hsa-miR-19b-3p	CALM1		hsa-miR-20a-5p	CCDC137		hsa-miR-21-5p	ITGB8		hsa-miR-221-3p	NUP210		hsa-miR-222-3p	EZR
AMD1				hsa-let-7a-5p	SEL1L3					hsa-miR-125b-5p	RYBP					hsa-miR-142-3p	ARNTL											hsa-miR-16-5p	EIF3K		hsa-miR-19b-3p	MREG		hsa-miR-20a-5p	MARCH6		hsa-miR-21-5p	ANKRD46		hsa-miR-221-3p	DDX6		hsa-miR-222-3p	KIF5C
SESN2				hsa-let-7a-5p	GSG2					hsa-miR-125b-5p	EIF4E					hsa-miR-142-3p	MTMR9											hsa-miR-16-5p	CCND2		hsa-miR-19b-3p	CFL2		hsa-miR-20a-5p	M6PR		hsa-miR-21-5p	FIGN		hsa-miR-221-3p	PNRC2		hsa-miR-222-3p	MAT2A
ILKAP				hsa-let-7a-5p	UBOX5					hsa-miR-125b-5p	DHX38					hsa-miR-142-3p	GPC4											hsa-miR-16-5p	SLC35A4		hsa-miR-19b-3p	PTBP2		hsa-miR-20a-5p	CHSY1		hsa-miR-21-5p	RASEF		hsa-miR-221-3p	DYRK3		hsa-miR-222-3p	UBN2
MBD2				hsa-let-7a-5p	CFL2					hsa-miR-125b-5p	TNFRSF10B					hsa-miR-142-3p	STX2											hsa-miR-16-5p	SRPRB		hsa-miR-19b-3p	CEP170		hsa-miR-20a-5p	SEPT2		hsa-miR-21-5p	BCL2		hsa-miR-221-3p	UBE2J1		hsa-miR-222-3p	RPL8
JPH4				hsa-let-7a-5p	HMGA2					hsa-miR-125b-5p	PMAIP1					hsa-miR-142-3p	AGBL2											hsa-miR-16-5p	CPNE8		hsa-miR-19b-3p	TNFRSF10B		hsa-miR-20a-5p	PVR		hsa-miR-21-5p	PTEN		hsa-miR-221-3p	DHX15		hsa-miR-222-3p	PANK3
MAP2K7				hsa-let-7a-5p	SMARCAD1					hsa-miR-125b-5p	PPP1R37					hsa-miR-142-3p	PANK3											hsa-miR-16-5p	MYO5A		hsa-miR-19b-3p	REM1		hsa-miR-20a-5p	TAX1BP1		hsa-miR-21-5p	VPS54		hsa-miR-221-3p	TCEAL1		hsa-miR-222-3p	TCOF1
KRTAP19-1				hsa-let-7a-5p	BEND4					hsa-miR-125b-5p	TAF15					hsa-miR-142-3p	SIK1											hsa-miR-16-5p	TMEM87A		hsa-miR-19b-3p	ZNF721		hsa-miR-20a-5p	EPS15L1		hsa-miR-21-5p	TNPO1		hsa-miR-221-3p	SMCHD1		hsa-miR-222-3p	GLRX5
ZNF774				hsa-let-7a-5p	CALU					hsa-miR-125b-5p	GPRIN1					hsa-miR-142-3p	TGFBR1											hsa-miR-16-5p	AXIN2		hsa-miR-19b-3p	SPG20		hsa-miR-20a-5p	AP1G1		hsa-miR-21-5p	BNIP2		hsa-miR-221-3p	CDKN1B		hsa-miR-222-3p	ZFYVE16
MEIS1				hsa-let-7a-5p	GLO1					hsa-miR-125b-5p	LIN28A					hsa-miR-142-3p	SRRD											hsa-miR-16-5p	NDUFA4		hsa-miR-19b-3p	NRBF2		hsa-miR-20a-5p	ARL9		hsa-miR-21-5p	CEP97		hsa-miR-221-3p	NFYA		hsa-miR-222-3p	STMN1
IGF2BP1				hsa-let-7a-5p	CCNG1					hsa-miR-125b-5p	PIK3CD					hsa-miR-142-3p	STRBP											hsa-miR-16-5p	C1orf56		hsa-miR-19b-3p	SMCR8		hsa-miR-20a-5p	KIAA1147		hsa-miR-21-5p	CKAP5		hsa-miR-221-3p	BCL2L11		hsa-miR-222-3p	CABYR
RBM12B				hsa-let-7a-5p	RHD					hsa-miR-125b-5p	TIMM23					hsa-miR-142-3p	CLEC4D											hsa-miR-16-5p	VEGFA		hsa-miR-19b-3p	TPGS2		hsa-miR-20a-5p	APP		hsa-miR-21-5p	SASH1		hsa-miR-221-3p	RAB5C		hsa-miR-222-3p	MEGF9
PHACTR4				hsa-let-7a-5p	STK4					hsa-miR-125b-5p	CLDN12					hsa-miR-142-3p	BAK1											hsa-miR-16-5p	TSPAN3		hsa-miR-19b-3p	MAP3K1		hsa-miR-20a-5p	UBXN2A		hsa-miR-21-5p	NCOA3		hsa-miR-221-3p	CDKN1B		hsa-miR-222-3p	ZBTB7A
NUPL1				hsa-let-7a-5p	RNF44					hsa-miR-125b-5p	SPRTN					hsa-miR-142-3p	IL6											hsa-miR-16-5p	ITGA2		hsa-miR-19b-3p	RACGAP1		hsa-miR-20a-5p	FEM1C		hsa-miR-21-5p	IREB2		hsa-miR-221-3p	CIAPIN1		hsa-miR-222-3p	SERPINH1
ZCCHC3				hsa-let-7a-5p	TRRAP					hsa-miR-125b-5p	RHOV					hsa-miR-142-3p	PCMTD2											hsa-miR-16-5p	AFF4		hsa-miR-19b-3p	TRIM33		hsa-miR-20a-5p	RANGAP1		hsa-miR-21-5p	SERPINB5		hsa-miR-221-3p	KLF9		hsa-miR-222-3p	DDX6
TMEM241				hsa-let-7a-5p	PNRC1					hsa-miR-125b-5p	SMO					hsa-miR-142-3p	PSMD11											hsa-miR-16-5p	EIF3E		hsa-miR-19b-3p	SPATA2		hsa-miR-20a-5p	CPT1A		hsa-miR-21-5p	WNT5A		hsa-miR-221-3p	CDK6		hsa-miR-222-3p	HOXA13
RPS10				hsa-let-7a-5p	GLUL					hsa-miR-125b-5p	EIF5A2					hsa-miR-142-3p	MALT1											hsa-miR-16-5p	BTAF1		hsa-miR-19b-3p	ZNF107		hsa-miR-20a-5p	CDKN1A		hsa-miR-21-5p	TMX4		hsa-miR-221-3p	ARHGEF18		hsa-miR-222-3p	HIST2H4B
FMNL3				hsa-let-7a-5p	LEFTY1					hsa-miR-125b-5p	CCNJ					hsa-miR-142-3p	MMGT1											hsa-miR-16-5p	PDCD1		hsa-miR-19b-3p	ADSS		hsa-miR-20a-5p	RTN2		hsa-miR-21-5p	GPAM		hsa-miR-221-3p	PCDHA11		hsa-miR-222-3p	ETS1
PSMA2				hsa-let-7a-5p	PAFAH2					hsa-miR-125b-5p	KRT7					hsa-miR-142-3p	FLVCR1											hsa-miR-16-5p	BHLHE40		hsa-miR-19b-3p	DDX6		hsa-miR-20a-5p	POLQ		hsa-miR-21-5p	FAM136A		hsa-miR-221-3p	SF1		hsa-miR-222-3p	KIF4A
ZNF264				hsa-let-7a-5p	NHLRC3					hsa-miR-125b-5p	FZD4					hsa-miR-142-3p	TNKS											hsa-miR-16-5p	SLC25A32		hsa-miR-19b-3p	ZNF367		hsa-miR-20a-5p	CDKN1A		hsa-miR-21-5p	PTEN		hsa-miR-221-3p	BNIP3		hsa-miR-222-3p	C19orf12
METTL6				hsa-let-7a-5p	MCF2L2					hsa-miR-125b-5p	HUWE1					hsa-miR-142-3p	SLC17A5											hsa-miR-16-5p	MTHFR		hsa-miR-19b-3p	C2orf42		hsa-miR-20a-5p	CLEC12B		hsa-miR-21-5p	ENAH		hsa-miR-221-3p	CDKN1B		hsa-miR-222-3p	CEP250
CCND2				hsa-let-7a-5p	ATP2B1					hsa-miR-125b-5p	DYRK2					hsa-miR-142-3p	HMGB1											hsa-miR-16-5p	RPS27		hsa-miR-19b-3p	AGO1		hsa-miR-20a-5p	ZNFX1		hsa-miR-21-5p	SLC31A1		hsa-miR-221-3p	UBN2		hsa-miR-222-3p	DERA
TMX2				hsa-let-7a-5p	PPP2R2A					hsa-miR-125b-5p	SSR3					hsa-miR-142-3p	RAC1											hsa-miR-16-5p	AMER1		hsa-miR-19b-3p	FN3KRP		hsa-miR-20a-5p	VPS13C		hsa-miR-21-5p	DCP1A		hsa-miR-221-3p	MDM2		hsa-miR-222-3p	MDM2
RBM6				hsa-let-7a-5p	SALL3					hsa-miR-125b-5p	ABCC4					hsa-miR-142-3p	CHRNA6											hsa-miR-16-5p	SREK1		hsa-miR-19b-3p	LZIC		hsa-miR-20a-5p	BZW1		hsa-miR-21-5p	FNBP1		hsa-miR-221-3p	SLC6A9		hsa-miR-222-3p	OGFOD1
FMO4				hsa-let-7a-5p	ITM2B					hsa-miR-125b-5p	LIN28A					hsa-miR-142-3p	CCNJ											hsa-miR-16-5p	SLC7A5		hsa-miR-19b-3p	LONRF1		hsa-miR-20a-5p	ANKH		hsa-miR-21-5p	CDK19		hsa-miR-221-3p	CNOT1		hsa-miR-222-3p	LYN
AP1S1				hsa-let-7a-5p	HIST1H1D					hsa-miR-125b-5p	NPTN					hsa-miR-142-3p	CRH											hsa-miR-16-5p	IPPK		hsa-miR-19b-3p	SIX4		hsa-miR-20a-5p	SERF1B		hsa-miR-21-5p	PTEN		hsa-miR-221-3p	ASXL3		hsa-miR-222-3p	UROD
MAP3K1				hsa-let-7a-5p	SMCR8					hsa-miR-125b-5p	SMC2					hsa-miR-142-3p	TSPYL1											hsa-miR-16-5p	RAB30		hsa-miR-19b-3p	CEP170		hsa-miR-20a-5p	OCRL		hsa-miR-21-5p	FAS		hsa-miR-221-3p	YWHAB		hsa-miR-222-3p	OIP5
ERN1				hsa-let-7a-5p	C19orf47					hsa-miR-125b-5p	ILVBL					hsa-miR-142-3p	CCNT2											hsa-miR-16-5p	MLF2		hsa-miR-19b-3p	CREB1		hsa-miR-20a-5p	RAP2C		hsa-miR-21-5p	MAP2K3		hsa-miR-221-3p	SERPINH1		hsa-miR-222-3p	CDKN1B
FOXJ3				hsa-let-7a-5p	HMGA1					hsa-miR-125b-5p	SEC14L3					hsa-miR-142-3p	TGFBR1											hsa-miR-16-5p	NNT		hsa-miR-19b-3p	DSN1		hsa-miR-20a-5p	EIF4A2		hsa-miR-21-5p	FUBP1		hsa-miR-221-3p	DDX6		hsa-miR-222-3p	TMUB1
EGFR				hsa-let-7a-5p	OPRL1					hsa-miR-125b-5p	PPAT					hsa-miR-142-3p	SLC35F5											hsa-miR-16-5p	SYNJ1		hsa-miR-19b-3p	FZD6		hsa-miR-20a-5p	PAPD5		hsa-miR-21-5p	NUFIP2		hsa-miR-221-3p	MIDN		hsa-miR-222-3p	PPP2R2A
ASCC3				hsa-let-7a-5p	ALDH7A1					hsa-miR-125b-5p	ABL1					hsa-miR-142-3p	PPP1R15B											hsa-miR-16-5p	PURA		hsa-miR-19b-3p	ALG2		hsa-miR-20a-5p	CRIM1		hsa-miR-21-5p	SOX5		hsa-miR-221-3p	LAMTOR5		hsa-miR-222-3p	EXO5
CDV3				hsa-let-7a-5p	NUDT5					hsa-miR-125b-5p	PRDX2					hsa-miR-142-3p	MORF4L2											hsa-miR-16-5p	HNRNPF		hsa-miR-19b-3p	TNRC6B		hsa-miR-20a-5p	POGZ		hsa-miR-21-5p	FOXN2		hsa-miR-221-3p	RPS24		hsa-miR-222-3p	CDKN1B
C1GALT1				hsa-let-7a-5p	FAM83G					hsa-miR-125b-5p	VCL					hsa-miR-142-3p	DEPDC1											hsa-miR-16-5p	ARMC12		hsa-miR-19b-3p	CCNL1		hsa-miR-20a-5p	RPS6KA5		hsa-miR-21-5p	PRRC1		hsa-miR-221-3p	C19orf12		hsa-miR-222-3p	RNF4
SURF4				hsa-let-7a-5p	GTF2I					hsa-miR-125b-5p	CSRNP2					hsa-miR-142-3p	GPD1L											hsa-miR-16-5p	TLK1		hsa-miR-19b-3p	AZIN1		hsa-miR-20a-5p	E2F3		hsa-miR-21-5p	DERL1		hsa-miR-221-3p	KIT		hsa-miR-222-3p	OAZ2
EIF3C				hsa-let-7a-5p	PDE12					hsa-miR-125b-5p	UNKL					hsa-miR-142-3p	TIFA											hsa-miR-16-5p	EN2		hsa-miR-19b-3p	C11orf96		hsa-miR-20a-5p	TCEB1		hsa-miR-21-5p	KLHL42		hsa-miR-221-3p	KHSRP		hsa-miR-222-3p	GJA1
STAT2				hsa-let-7a-5p	NEFM					hsa-miR-125b-5p	SGPL1					hsa-miR-142-3p	STRN3											hsa-miR-16-5p	DAP3		hsa-miR-19b-3p	MFSD6		hsa-miR-20a-5p	ENTPD7		hsa-miR-21-5p	SFXN1		hsa-miR-221-3p	RPL15		hsa-miR-222-3p	CDC27
ZNF556				hsa-let-7a-5p	HRAS					hsa-miR-125b-5p	PCTP					hsa-miR-142-3p	SNTN											hsa-miR-16-5p	SLC29A1		hsa-miR-19b-3p	LIN9		hsa-miR-20a-5p	PRKD3		hsa-miR-21-5p	APAF1		hsa-miR-221-3p	KIT		hsa-miR-222-3p	YWHAG
DPH5				hsa-let-7a-5p	GRPEL2					hsa-miR-125b-5p	WNK1					hsa-miR-142-3p	CCNT2											hsa-miR-16-5p	HOXA10		hsa-miR-19b-3p	ELOVL5		hsa-miR-20a-5p	REEP3		hsa-miR-21-5p	SERPINI1		hsa-miR-221-3p	OIP5		hsa-miR-222-3p	CDKN1B
SLC12A7				hsa-let-7a-5p	IGDCC4					hsa-miR-125b-5p	MFHAS1					hsa-miR-142-3p	TET3											hsa-miR-16-5p	ZNF391		hsa-miR-19b-3p	EGLN3		hsa-miR-20a-5p	SLAIN2		hsa-miR-21-5p	SERPINB5		hsa-miR-221-3p	CDKN1B		hsa-miR-222-3p	CDKN1B
TAF5L				hsa-let-7a-5p	DHX9					hsa-miR-125b-5p	R3HDM2					hsa-miR-142-3p	RNF20											hsa-miR-16-5p	ASXL2		hsa-miR-19b-3p	SNX17		hsa-miR-20a-5p	GIGYF1		hsa-miR-21-5p	SAMD5		hsa-miR-221-3p	TOMM20		hsa-miR-222-3p	POLD2
AGO1				hsa-let-7a-5p	CELF1					hsa-miR-125b-5p	ENPEP					hsa-miR-142-3p	PSMD12											hsa-miR-16-5p	MRPS10		hsa-miR-19b-3p	GMFB		hsa-miR-20a-5p	ABL2		hsa-miR-21-5p	C15orf52		hsa-miR-221-3p	EXO5		hsa-miR-222-3p	CSAG1
RPL4				hsa-let-7a-5p	ZBTB37					hsa-miR-125b-5p	FAM199X					hsa-miR-142-3p	PROM1											hsa-miR-16-5p	TBRG1		hsa-miR-19b-3p	KLF10		hsa-miR-20a-5p	FAHD1		hsa-miR-21-5p	HPGD		hsa-miR-221-3p	PTPRF		hsa-miR-222-3p	SLC25A51
NUP155				hsa-let-7a-5p	CAND2					hsa-miR-125b-5p	LUC7L3					hsa-miR-142-3p	FAM208B											hsa-miR-16-5p	UBE2Q2		hsa-miR-19b-3p	RCOR1		hsa-miR-20a-5p	TMEM196		hsa-miR-21-5p	JAG1		hsa-miR-221-3p	CDKN1B		hsa-miR-222-3p	HCFC1
EGR3				hsa-let-7a-5p	ZBTB5					hsa-miR-125b-5p	TP53INP1					hsa-miR-142-3p	FAM222B											hsa-miR-16-5p	VPS4A		hsa-miR-19b-3p	SATB1		hsa-miR-20a-5p	TMEM64		hsa-miR-21-5p	YOD1		hsa-miR-221-3p	PCDHA12		hsa-miR-222-3p	DKK2
CDC34				hsa-let-7a-5p	TGFBR3					hsa-miR-125b-5p	HIST2H2BF					hsa-miR-142-3p	HSD17B4											hsa-miR-16-5p	PHIP		hsa-miR-19b-3p	CEP55		hsa-miR-20a-5p	F2RL3		hsa-miR-21-5p	TOPORS		hsa-miR-221-3p	ETS1		hsa-miR-222-3p	SDHA
YAE1D1				hsa-let-7a-5p	RPS15A					hsa-miR-125b-5p	HOXD1					hsa-miR-142-3p	KCTD12											hsa-miR-16-5p	MIS12		hsa-miR-19b-3p	GPATCH8		hsa-miR-20a-5p	DUSP2		hsa-miR-21-5p	NETO2		hsa-miR-221-3p	RHOA		hsa-miR-222-3p	YLPM1
UNK				hsa-let-7a-5p	HRAS					hsa-miR-125b-5p	LYPLA2					hsa-miR-142-3p	ATG9A											hsa-miR-16-5p	SPRYD3		hsa-miR-19b-3p	SLC48A1		hsa-miR-20a-5p	SOD2		hsa-miR-21-5p	RPS7		hsa-miR-221-3p	FOS		hsa-miR-222-3p	PNRC2
S100PBP				hsa-let-7a-5p	MEPCE					hsa-miR-125b-5p	DHX33					hsa-miR-142-3p	WHSC1											hsa-miR-16-5p	RPSA		hsa-miR-19b-3p	C5orf30		hsa-miR-20a-5p	LDLR		hsa-miR-21-5p	LCORL		hsa-miR-221-3p	CDC27		hsa-miR-222-3p	IRF2BP2
NAA30				hsa-let-7a-5p	RBFOX2					hsa-miR-125b-5p	FRAT2					hsa-miR-142-3p	RAC1											hsa-miR-16-5p	ATP5G3		hsa-miR-19b-3p	HDAC4		hsa-miR-20a-5p	KCND3		hsa-miR-21-5p	EPM2A		hsa-miR-221-3p	CDKN1C		hsa-miR-222-3p	LGALS3BP
NDUFAF3				hsa-let-7a-5p	WASL					hsa-miR-125b-5p	MATR3					hsa-miR-142-3p	MSANTD4											hsa-miR-16-5p	LSM10		hsa-miR-19b-3p	BTG1		hsa-miR-20a-5p	B4GALT2		hsa-miR-21-5p	C10orf137		hsa-miR-221-3p	TMEM245		hsa-miR-222-3p	COG5
CRYBG3				hsa-let-7a-5p	HMGA2					hsa-miR-125b-5p	LTV1					hsa-miR-142-3p	CALCOCO2											hsa-miR-16-5p	ZNF280C		hsa-miR-19b-3p	SUV420H1		hsa-miR-20a-5p	SUCO		hsa-miR-21-5p	PER2		hsa-miR-221-3p	RNF20		hsa-miR-222-3p	CORO1A
MPL				hsa-let-7a-5p	DISC1					hsa-miR-125b-5p	RPL29					hsa-miR-142-3p	HSPA1B											hsa-miR-16-5p	BCL2		hsa-miR-19b-3p	CDK19		hsa-miR-20a-5p	BCL2L11		hsa-miR-21-5p	GNAQ		hsa-miR-221-3p	HIST1H2AC		hsa-miR-222-3p	NOLC1
RAVER1				hsa-let-7a-5p	PALD1					hsa-miR-125b-5p	KRTAP5-9					hsa-miR-142-3p	ROCK2											hsa-miR-16-5p	UTP3		hsa-miR-19b-3p	KPNA6		hsa-miR-20a-5p	SYNPO2L		hsa-miR-21-5p	MGA		hsa-miR-221-3p	CDKN1B		hsa-miR-222-3p	IARS
GGA3				hsa-let-7a-5p	SMARCAD1					hsa-miR-125b-5p	IP6K1					hsa-miR-142-3p	CCNG1											hsa-miR-16-5p	RAP2C		hsa-miR-19b-3p	GIGYF1		hsa-miR-20a-5p	RPL31		hsa-miR-21-5p	E2F1		hsa-miR-221-3p	CTNNB1		hsa-miR-222-3p	ISG20L2
HERPUD1				hsa-let-7a-5p	E2F2					hsa-miR-125b-5p	FAM208A					hsa-miR-142-3p	RPE											hsa-miR-16-5p	CDADC1		hsa-miR-19b-3p	NRBP1		hsa-miR-20a-5p	FZD9		hsa-miR-21-5p	KIAA1715		hsa-miR-221-3p	TSPAN13		hsa-miR-222-3p	TMEM2
TAF9B				hsa-let-7a-5p	PEX14					hsa-miR-125b-5p	MRTO4					hsa-miR-142-3p	TMTC3											hsa-miR-16-5p	LYPLA2		hsa-miR-19b-3p	PAFAH1B2		hsa-miR-20a-5p	CCDC132		hsa-miR-21-5p	SLK		hsa-miR-221-3p	PEX1		hsa-miR-222-3p	PHAX
ACER2				hsa-let-7a-5p	ZMYM3					hsa-miR-125b-5p	ANAPC16					hsa-miR-142-3p	PITPNC1											hsa-miR-16-5p	GLB1L3		hsa-miR-19b-3p	RNF41		hsa-miR-20a-5p	TAX1BP1		hsa-miR-21-5p	DCAF10		hsa-miR-221-3p	RUNDC3B		hsa-miR-222-3p	PAIP2
HAND1				hsa-let-7a-5p	C1orf210					hsa-miR-125b-5p	RANBP2					hsa-miR-142-3p	VPS52											hsa-miR-16-5p	CRK		hsa-miR-19b-3p	ARHGEF28		hsa-miR-20a-5p	MYO1F		hsa-miR-21-5p	SOX5		hsa-miR-221-3p	ASZ1		hsa-miR-222-3p	USP15
PMAIP1				hsa-let-7a-5p	HMGA1					hsa-miR-125b-5p	CREBBP					hsa-miR-142-3p	TAB2											hsa-miR-16-5p	B4GALT1		hsa-miR-19b-3p	CD46		hsa-miR-20a-5p	SLC30A1		hsa-miR-21-5p	CAPRIN1		hsa-miR-221-3p	CYP1B1		hsa-miR-222-3p	ZW10
NDUFS2				hsa-let-7a-5p	BCAT1					hsa-miR-125b-5p	TEF					hsa-miR-142-3p	TSEN34											hsa-miR-16-5p	RPS12		hsa-miR-19b-3p	ACTB		hsa-miR-20a-5p	EPS15L1		hsa-miR-21-5p	RAB22A		hsa-miR-221-3p	MIEN1		hsa-miR-222-3p	CDKN1B
PHTF2				hsa-let-7a-5p	SLC20A1					hsa-miR-125b-5p	STRN3					hsa-miR-142-3p	ITGAV											hsa-miR-16-5p	RAB1B		hsa-miR-19b-3p	RAB2B		hsa-miR-20a-5p	SOD2		hsa-miR-21-5p	SPRY2		hsa-miR-221-3p	COG5		hsa-miR-222-3p	PBX2
PRIM2				hsa-let-7a-5p	SEMA4C					hsa-miR-125b-5p	C2orf88					hsa-miR-142-3p	HSPA1B											hsa-miR-16-5p	HSDL2		hsa-miR-19b-3p	PAPD4		hsa-miR-20a-5p	WASL		hsa-miR-21-5p	COX20		hsa-miR-221-3p	TSN		hsa-miR-222-3p	ARHGAP42
BPTF				hsa-let-7a-5p	RAVER2					hsa-miR-125b-5p	ERBB3					hsa-miR-142-3p	SLC35F5											hsa-miR-16-5p	HSPA4L		hsa-miR-19b-3p	BCL3		hsa-miR-20a-5p	E2F1		hsa-miR-21-5p	MYC		hsa-miR-221-3p	ICAM1		hsa-miR-222-3p	GLO1
RAB11FIP4				hsa-let-7a-5p	PDE12					hsa-miR-125b-5p	CSNK2A1					hsa-miR-142-3p	MRFAP1											hsa-miR-16-5p	HNRNPA2B1		hsa-miR-19b-3p	FBLIM1		hsa-miR-20a-5p	ZBTB18		hsa-miR-21-5p	MGAT4A		hsa-miR-221-3p	TMEM2		hsa-miR-222-3p	TRMT5
EFHD2				hsa-let-7a-5p	ARRDC3					hsa-miR-125b-5p	NRARP					hsa-miR-142-3p	EVI2B											hsa-miR-16-5p	RBBP6		hsa-miR-19b-3p	ZNF107		hsa-miR-20a-5p	GLO1		hsa-miR-21-5p	RPS7		hsa-miR-221-3p	DVL2		hsa-miR-222-3p	RECK
CARHSP1				hsa-let-7a-5p	FBXL20					hsa-miR-125b-5p	RNH1					hsa-miR-142-3p	NCK2											hsa-miR-16-5p	CIRH1A		hsa-miR-19b-3p	CREBL2		hsa-miR-20a-5p	SOCS5		hsa-miR-21-5p	PIAS3		hsa-miR-221-3p	PDIK1L		hsa-miR-222-3p	CDKN1C
GPM6B				hsa-let-7a-5p	SETD7					hsa-miR-125b-5p	BCOR					hsa-miR-142-3p	KMT2A											hsa-miR-16-5p	LAPTM4B		hsa-miR-19b-3p	DMXL2		hsa-miR-20a-5p	GPR157		hsa-miR-21-5p	PPARA		hsa-miR-221-3p	AMOT		hsa-miR-222-3p	ENO1
DTX3L				hsa-let-7a-5p	YOD1					hsa-miR-125b-5p	SPATA5					hsa-miR-142-3p	ZNF529											hsa-miR-16-5p	CCNE1		hsa-miR-19b-3p	CCNL1		hsa-miR-20a-5p	CDKN2AIPNL		hsa-miR-21-5p	ZCCHC3		hsa-miR-221-3p	MAT2A		hsa-miR-222-3p	RBM10
CNBP				hsa-let-7a-5p	HIST1H4D					hsa-miR-125b-5p	CASC3					hsa-miR-142-3p	BMP8A											hsa-miR-16-5p	RPL31		hsa-miR-19b-3p	CNOT4		hsa-miR-20a-5p	SLC25A28		hsa-miR-21-5p	RPS7		hsa-miR-221-3p	CDKN1C		hsa-miR-222-3p	IRAK1
MED13L				hsa-let-7a-5p	COIL					hsa-miR-125b-5p	PIAS3					hsa-miR-142-3p	GOLT1B											hsa-miR-16-5p	WEE1		hsa-miR-19b-3p	PRKAA1		hsa-miR-20a-5p	HMGB1		hsa-miR-21-5p	PTBP3		hsa-miR-221-3p	VPS53		hsa-miR-222-3p	PRDX4
PARP16				hsa-let-7a-5p	MRPL12					hsa-miR-125b-5p	NEBL					hsa-miR-142-3p	FAM127A											hsa-miR-16-5p	RPL27A		hsa-miR-19b-3p	PFN2		hsa-miR-20a-5p	NIN		hsa-miR-21-5p	PM20D2		hsa-miR-221-3p	CDKN1C		hsa-miR-222-3p	CDKN1B
TMEM165				hsa-let-7a-5p	GSG2					hsa-miR-125b-5p	TARDBP					hsa-miR-142-3p	DYRK3											hsa-miR-16-5p	CLTC		hsa-miR-19b-3p	STX6		hsa-miR-20a-5p	TMEM245		hsa-miR-21-5p	BTG2		hsa-miR-221-3p	RNPS1		hsa-miR-222-3p	ZMYND11
HNRNPDL				hsa-let-7a-5p	TAF5					hsa-miR-125b-5p	MYO19					hsa-miR-142-3p	ABCG2											hsa-miR-16-5p	BMI1		hsa-miR-19b-3p	GFOD1		hsa-miR-20a-5p	TMX4		hsa-miR-21-5p	TBL1XR1		hsa-miR-221-3p	TMEM64		hsa-miR-222-3p	ZNF714
MTX3				hsa-let-7a-5p	RDX					hsa-miR-125b-5p	LINS					hsa-miR-142-3p	APC											hsa-miR-16-5p	AGRN		hsa-miR-19b-3p	SWT1		hsa-miR-20a-5p	PAFAH1B1		hsa-miR-21-5p	BCL2		hsa-miR-221-3p	CDKN1B		hsa-miR-222-3p	SLC25A36
C19orf53				hsa-let-7a-5p	RNFT1					hsa-miR-125b-5p	ZDHHC5					hsa-miR-142-3p	SDCCAG3											hsa-miR-16-5p	TMEM189-UBE2V1		hsa-miR-19b-3p	PAPD4		hsa-miR-20a-5p	SMAD4		hsa-miR-21-5p	RNF185		hsa-miR-221-3p	SLC30A7		hsa-miR-222-3p	TP53
COPZ1				hsa-let-7a-5p	ATP6V1G1					hsa-miR-125b-5p	ZNF483					hsa-miR-142-3p	TWF1											hsa-miR-16-5p	GSTM4		hsa-miR-19b-3p	PCDH10		hsa-miR-20a-5p	FBXL7		hsa-miR-21-5p	DLG1		hsa-miR-221-3p	PCDHA13		hsa-miR-222-3p	DPP8
MXD1				hsa-let-7a-5p	EIF4G2					hsa-miR-125b-5p	AHRR					hsa-miR-142-3p	SPPL2A											hsa-miR-16-5p	HNRNPL		hsa-miR-19b-3p	SAMD8		hsa-miR-20a-5p	EFCAB14		hsa-miR-21-5p	RDH11		hsa-miR-221-3p	RBM39		hsa-miR-222-3p	SOD2
AIDA				hsa-let-7a-5p	MTUS1					hsa-miR-125b-5p	SEC24A					hsa-miR-142-3p	HIST1H4D											hsa-miR-16-5p	MIB1		hsa-miR-19b-3p	ARFGEF1		hsa-miR-20a-5p	BTG2		hsa-miR-21-5p	ZFYVE16		hsa-miR-221-3p	TRPS1		hsa-miR-222-3p	ZNF770
CRY2				hsa-let-7a-5p	RPS13					hsa-miR-125b-5p	PTBP1					hsa-miR-142-3p	ABCC9											hsa-miR-16-5p	DDX54		hsa-miR-19b-3p	RASSF1		hsa-miR-20a-5p	MIDN		hsa-miR-21-5p	LAMP2					hsa-miR-222-3p	VCP
AOC2				hsa-let-7a-5p	AMD1					hsa-miR-125b-5p	ETS1					hsa-miR-142-3p	ARL5B											hsa-miR-16-5p	ATG14		hsa-miR-19b-3p	BTF3L4		hsa-miR-20a-5p	SENP1		hsa-miR-21-5p	MOXD1					hsa-miR-222-3p	CDKN1B
GP5				hsa-let-7a-5p	SESN2					hsa-miR-125b-5p	PIGF					hsa-miR-142-3p	HOXA10											hsa-miR-16-5p	HMGA2		hsa-miR-19b-3p	ZNF507		hsa-miR-20a-5p	HMGB1		hsa-miR-21-5p	CBX4					hsa-miR-222-3p	MAZ
FPR1				hsa-let-7a-5p	FAM105A					hsa-miR-125b-5p	NDOR1					hsa-miR-142-3p	STRBP											hsa-miR-16-5p	RASEF		hsa-miR-19b-3p	ZBTB4		hsa-miR-20a-5p	USP3		hsa-miR-21-5p	EGFR					hsa-miR-222-3p	MCM7
YWHAZ				hsa-let-7a-5p	ILKAP					hsa-miR-125b-5p	CYP24A1					hsa-miR-142-3p	TMEM59											hsa-miR-16-5p	DCTN5		hsa-miR-19b-3p	BLCAP		hsa-miR-20a-5p	PTP4A1		hsa-miR-21-5p	ORC4					hsa-miR-222-3p	CDKN1C
RAB19				hsa-let-7a-5p	MBD2					hsa-miR-125b-5p	MED1					hsa-miR-142-3p	TMEM101											hsa-miR-16-5p	TIA1		hsa-miR-19b-3p	ANKRD12		hsa-miR-20a-5p	ZNF202		hsa-miR-21-5p	TGFB1					hsa-miR-222-3p	BAG6
SOD2				hsa-let-7a-5p	JPH4					hsa-miR-125b-5p	REST					hsa-miR-142-3p	AKR1B10											hsa-miR-16-5p	EARS2		hsa-miR-19b-3p	PRRG4		hsa-miR-20a-5p	ATXN7L3B		hsa-miR-21-5p	RDH11					hsa-miR-222-3p	KIT
BCL2L11				hsa-let-7a-5p	MAP2K7					hsa-miR-125b-5p	SRRM2					hsa-miR-142-3p	GNAS											hsa-miR-16-5p	GNB1		hsa-miR-19b-3p	SPATA2		hsa-miR-20a-5p	EGR2		hsa-miR-21-5p	GRPEL2					hsa-miR-222-3p	ETS1
SDR42E1				hsa-let-7a-5p	KRTAP19-1											hsa-miR-142-3p	MORF4L1											hsa-miR-16-5p	PRDM4		hsa-miR-19b-3p	KIAA0907		hsa-miR-20a-5p	FJX1		hsa-miR-21-5p	MTAP					hsa-miR-222-3p	FOS
SKA3				hsa-let-7a-5p	ZNF774											hsa-miR-142-3p	AFF1											hsa-miR-16-5p	HMGA1		hsa-miR-19b-3p	G3BP2		hsa-miR-20a-5p	BBX		hsa-miR-21-5p	NT5C2					hsa-miR-222-3p	AP1B1
CCR7				hsa-let-7a-5p	MEIS1											hsa-miR-142-3p	WIZ											hsa-miR-16-5p	VMA21		hsa-miR-19b-3p	MBNL1		hsa-miR-20a-5p	NARS		hsa-miR-21-5p	BASP1					hsa-miR-222-3p	MCM3
ZCCHC9				hsa-let-7a-5p	IGF2BP1											hsa-miR-142-3p	TBX4											hsa-miR-16-5p	GOLGA7		hsa-miR-19b-3p	RBBP8		hsa-miR-20a-5p	RACGAP1		hsa-miR-21-5p	TNRC6B					hsa-miR-222-3p	ACACA
CD59				hsa-let-7a-5p	RBM12B											hsa-miR-142-3p	MBD6											hsa-miR-16-5p	RPL10		hsa-miR-19b-3p	HBP1		hsa-miR-20a-5p	MLLT1		hsa-miR-21-5p	DUSP10
HAS2				hsa-let-7a-5p	PHACTR4											hsa-miR-142-3p	ACACA											hsa-miR-16-5p	SREK1		hsa-miR-19b-3p	SLAIN1		hsa-miR-20a-5p	ZNF12		hsa-miR-21-5p	HAPLN1
HOXB4				hsa-let-7a-5p	NUPL1											hsa-miR-142-3p	POLI											hsa-miR-16-5p	GEMIN4		hsa-miR-19b-3p	CD164		hsa-miR-20a-5p	NFAT5		hsa-miR-21-5p	PDCD4
UBXN2B				hsa-let-7a-5p	HMGA1											hsa-miR-142-3p	CLIC4											hsa-miR-16-5p	VPS4A		hsa-miR-19b-3p	TGIF1		hsa-miR-20a-5p	BTN3A3		hsa-miR-21-5p	DDAH1
MRS2				hsa-let-7a-5p	ZCCHC3											hsa-miR-142-3p	WHSC1											hsa-miR-16-5p	ELP3		hsa-miR-19b-3p	FZD6		hsa-miR-20a-5p	ZMAT3		hsa-miR-21-5p	MOAP1
EDEM3				hsa-let-7a-5p	TMEM241											hsa-miR-142-3p	AFF1											hsa-miR-16-5p	NSUN2		hsa-miR-19b-3p	BLCAP		hsa-miR-20a-5p	IL17RC		hsa-miR-21-5p	WHSC1L1
ACTB				hsa-let-7a-5p	RAB40C											hsa-miR-142-3p	SLC37A3											hsa-miR-16-5p	BCL2		hsa-miR-19b-3p	CGN		hsa-miR-20a-5p	DNAJB9		hsa-miR-21-5p	PPIF
ZNF584				hsa-let-7a-5p	RPS10											hsa-miR-142-3p	USP37											hsa-miR-16-5p	AHNAK2		hsa-miR-19b-3p	KCTD10		hsa-miR-20a-5p	CDKN1A		hsa-miR-21-5p	ALMS1
PAQR5				hsa-let-7a-5p	FMNL3											hsa-miR-142-3p	TNRC18											hsa-miR-16-5p	MTMR4		hsa-miR-19b-3p	ATXN7		hsa-miR-20a-5p	FOXK2		hsa-miR-21-5p	PDCD4
CCNT2				hsa-let-7a-5p	PSMA2											hsa-miR-142-3p	AFF1											hsa-miR-16-5p	PHF19		hsa-miR-19b-3p	MPRIP		hsa-miR-20a-5p	RAN		hsa-miR-21-5p	AP1AR
CNTRL				hsa-let-7a-5p	ZNF264											hsa-miR-142-3p	HMGA1											hsa-miR-16-5p	SNX15		hsa-miR-19b-3p	SEMA4C		hsa-miR-20a-5p	WDR53		hsa-miR-21-5p	KLF5
RPL30				hsa-let-7a-5p	ZNF566											hsa-miR-142-3p	MORF4L1											hsa-miR-16-5p	IGSF1		hsa-miR-19b-3p	KLHL11		hsa-miR-20a-5p	FOXK2		hsa-miR-21-5p	UQCRB
OPA3				hsa-let-7a-5p	METTL6											hsa-miR-142-3p	DIP2A											hsa-miR-16-5p	PROSC		hsa-miR-19b-3p	XYLT2		hsa-miR-20a-5p	LZIC		hsa-miR-21-5p	RAB6C
TRIO				hsa-let-7a-5p	FBXW2																							hsa-miR-16-5p	COA6		hsa-miR-19b-3p	DDX3Y		hsa-miR-20a-5p	LAPTM4A		hsa-miR-21-5p	PTEN
DVL3				hsa-let-7a-5p	CCND2																							hsa-miR-16-5p	ATAD5		hsa-miR-19b-3p	TGOLN2		hsa-miR-20a-5p	ZNF280C		hsa-miR-21-5p	NSUN2
FKBP8				hsa-let-7a-5p	TMX2																							hsa-miR-16-5p	PPP2R5C		hsa-miR-19b-3p	RNF44		hsa-miR-20a-5p	CNKSR3		hsa-miR-21-5p	HERPUD2
PM20D2				hsa-let-7a-5p	RBM6																							hsa-miR-16-5p	RICTOR		hsa-miR-19b-3p	BEND3		hsa-miR-20a-5p	MLXIP		hsa-miR-21-5p	PDCD4
LYN				hsa-let-7a-5p	RRM2																							hsa-miR-16-5p	UFSP2		hsa-miR-19b-3p	PABPC4L		hsa-miR-20a-5p	CNOT4		hsa-miR-21-5p	BAZ1B
GTF3C5				hsa-let-7a-5p	FMO4																							hsa-miR-16-5p	ZBTB10		hsa-miR-19b-3p	CCAR2		hsa-miR-20a-5p	TAX1BP1		hsa-miR-21-5p	FILIP1L
AMMECR1				hsa-let-7a-5p	MBD2																							hsa-miR-16-5p	ZBTB34		hsa-miR-19b-3p	C5orf24		hsa-miR-20a-5p	MYLIP		hsa-miR-21-5p	PHF20
UHRF1				hsa-let-7a-5p	AP1S1																							hsa-miR-16-5p	FAM122C		hsa-miR-19b-3p	MLEC		hsa-miR-20a-5p	SERF2		hsa-miR-21-5p	MTAP
GOLGA4				hsa-let-7a-5p	MAP3K1																							hsa-miR-16-5p	DMAP1		hsa-miR-19b-3p	KCTD10		hsa-miR-20a-5p	EFCAB14		hsa-miR-21-5p	NTF3
RANBP2				hsa-let-7a-5p	ERN1																							hsa-miR-16-5p	PRKAB2		hsa-miR-19b-3p	SLC30A7		hsa-miR-20a-5p	MELK		hsa-miR-21-5p	CNTRL
KIAA0930				hsa-let-7a-5p	THEM6																							hsa-miR-16-5p	RBBP6		hsa-miR-19b-3p	SLC38A2		hsa-miR-20a-5p	ANKRD52		hsa-miR-21-5p	C15orf52
SP1				hsa-let-7a-5p	FOXJ3																							hsa-miR-16-5p	HSPA1B		hsa-miR-19b-3p	GFPT1		hsa-miR-20a-5p	CTSA		hsa-miR-21-5p	SUZ12
GPN1				hsa-let-7a-5p	SMARCAD1																							hsa-miR-16-5p	KDSR		hsa-miR-19b-3p	ZMAT3		hsa-miR-20a-5p	KIAA0101		hsa-miR-21-5p	RAPH1
CTDP1				hsa-let-7a-5p	EMILIN2																							hsa-miR-16-5p	RPLP0		hsa-miR-19b-3p	RHOB		hsa-miR-20a-5p	MAPRE3		hsa-miR-21-5p	HIC2
G2E3				hsa-let-7a-5p	EGFR																							hsa-miR-16-5p	ATP8A2		hsa-miR-19b-3p	VPS37B		hsa-miR-20a-5p	FBXO48		hsa-miR-21-5p	PDCD4
MSI2				hsa-let-7a-5p	ASCC3																							hsa-miR-16-5p	ZNF367		hsa-miR-19b-3p	ZNF544		hsa-miR-20a-5p	CCND1		hsa-miR-21-5p	STAT3
MFSD8				hsa-let-7a-5p	RNF44																							hsa-miR-16-5p	GNAL		hsa-miR-19b-3p	DNMT1		hsa-miR-20a-5p	PTEN		hsa-miR-21-5p	REV1
DDX18				hsa-let-7a-5p	RBFOX2																							hsa-miR-16-5p	TNFRSF12A		hsa-miR-19b-3p	TBRG1		hsa-miR-20a-5p	TCEA1		hsa-miR-21-5p	PDCD4
CD276				hsa-let-7a-5p	CDV3																							hsa-miR-16-5p	MYC		hsa-miR-19b-3p	ARHGAP1		hsa-miR-20a-5p	HMGB3		hsa-miR-21-5p	DOCK4
DNAJC28				hsa-let-7a-5p	C1GALT1																							hsa-miR-16-5p	NRXN1		hsa-miR-19b-3p	FAM73A		hsa-miR-20a-5p	PNPLA4		hsa-miR-21-5p	APOLD1
PHF6				hsa-let-7a-5p	SURF4																							hsa-miR-16-5p	EIF3H		hsa-miR-19b-3p	PSG4		hsa-miR-20a-5p	TP53INP1		hsa-miR-21-5p	IL1B
AMPD2				hsa-let-7a-5p	PDE12																							hsa-miR-16-5p	PI4K2B		hsa-miR-19b-3p	AP3S2		hsa-miR-20a-5p	TANC1		hsa-miR-21-5p	CLIP4
EPHA4				hsa-let-7a-5p	EIF3C																							hsa-miR-16-5p	NOB1		hsa-miR-19b-3p	CLIC4		hsa-miR-20a-5p	CEP72		hsa-miR-21-5p	RHO
TARS				hsa-let-7a-5p	NOA1																							hsa-miR-16-5p	IPO5		hsa-miR-19b-3p	ABHD14B		hsa-miR-20a-5p	RBM12B		hsa-miR-21-5p	NBEA
NID2				hsa-let-7a-5p	STAT2																							hsa-miR-16-5p	PPP1R11		hsa-miR-19b-3p	ZNF154		hsa-miR-20a-5p	BTG3		hsa-miR-21-5p	SOWAHC
FUT10				hsa-let-7a-5p	ZNF556																							hsa-miR-16-5p	PPIL1		hsa-miR-19b-3p	MB21D2		hsa-miR-20a-5p	VDAC1		hsa-miR-21-5p	VPS13A
SPTBN1				hsa-let-7a-5p	DPH5																							hsa-miR-16-5p	RPLP1		hsa-miR-19b-3p	MXD1		hsa-miR-20a-5p	EIF4H		hsa-miR-21-5p	PDCD4
CBX5				hsa-let-7a-5p	SLC12A7																							hsa-miR-16-5p	VEGFA		hsa-miR-19b-3p	EVI5L		hsa-miR-20a-5p	PHF6		hsa-miR-21-5p	PTEN
TBC1D19				hsa-let-7a-5p	TAF5L																							hsa-miR-16-5p	AHNAK2		hsa-miR-19b-3p	CCND2		hsa-miR-20a-5p	MIXL1		hsa-miR-21-5p	NAA50
PIK3R1				hsa-let-7a-5p	AGO1																							hsa-miR-16-5p	SRPR		hsa-miR-19b-3p	SECISBP2L		hsa-miR-20a-5p	DEGS1		hsa-miR-21-5p	AHSA2
ARL6IP6				hsa-let-7a-5p	RPL4																							hsa-miR-16-5p	COL4A1		hsa-miR-19b-3p	PATL1		hsa-miR-20a-5p	SH3GLB1		hsa-miR-21-5p	PTPN14
NDUFAF7				hsa-let-7a-5p	NUP155																							hsa-miR-16-5p	NUFIP2		hsa-miR-19b-3p	NF1		hsa-miR-20a-5p	KLHL15		hsa-miR-21-5p	ANKRD28
ZNF780A				hsa-let-7a-5p	EGR3																							hsa-miR-16-5p	TAOK1		hsa-miR-19b-3p	MRPL17		hsa-miR-20a-5p	RNASEH1		hsa-miR-21-5p	HS3ST3B1
LRRC20				hsa-let-7a-5p	CDC34																							hsa-miR-16-5p	ZNF460		hsa-miR-19b-3p	SEMA6B		hsa-miR-20a-5p	LRPAP1		hsa-miR-21-5p	RECK
KIAA1147				hsa-let-7a-5p	YAE1D1																							hsa-miR-16-5p	PPT1		hsa-miR-19b-3p	SIRPB2		hsa-miR-20a-5p	WEE1		hsa-miR-21-5p	ZNF532
ZNF8				hsa-let-7a-5p	UNK																							hsa-miR-16-5p	RNMT		hsa-miR-19b-3p	SOX6		hsa-miR-20a-5p	EIF5A2		hsa-miR-21-5p	PTEN
CPA4				hsa-let-7a-5p	S100PBP																							hsa-miR-16-5p	KIAA1456		hsa-miR-19b-3p	ZNF711		hsa-miR-20a-5p	NUGGC		hsa-miR-21-5p	ST6GAL1
TSPAN3				hsa-let-7a-5p	NAA30																							hsa-miR-16-5p	HSPA9		hsa-miR-19b-3p	PARK2		hsa-miR-20a-5p	AP3S2		hsa-miR-21-5p	EIF5
FAM104A				hsa-let-7a-5p	AGO1																							hsa-miR-16-5p	SCAF4		hsa-miR-19b-3p	ARHGAP1		hsa-miR-20a-5p	C16orf70		hsa-miR-21-5p	BMPR2
MAPK11				hsa-let-7a-5p	NDUFAF3																							hsa-miR-16-5p	KIF5B		hsa-miR-19b-3p	RAB5B		hsa-miR-20a-5p	TNKS2		hsa-miR-21-5p	E2F3
CAMK2D				hsa-let-7a-5p	LRIG3																							hsa-miR-16-5p	HSPA1B		hsa-miR-19b-3p	ARC		hsa-miR-20a-5p	RPS6KA5		hsa-miR-21-5p	PROSER1
RNF144B				hsa-let-7a-5p	ZFAND4																							hsa-miR-16-5p	CDK6		hsa-miR-19b-3p	VAMP1		hsa-miR-20a-5p	LIAS		hsa-miR-21-5p	PDCD4
CIRH1A				hsa-let-7a-5p	ZBTB5																							hsa-miR-16-5p	INF2		hsa-miR-19b-3p	SMG1		hsa-miR-20a-5p	GABPB1		hsa-miR-21-5p	KLHL24
ATXN2				hsa-let-7a-5p	RHD																							hsa-miR-16-5p	TEP1		hsa-miR-19b-3p	MTX3		hsa-miR-20a-5p	COIL		hsa-miR-21-5p	MSH2
HIST1H2BK				hsa-let-7a-5p	CRYBG3																							hsa-miR-16-5p	KANK1		hsa-miR-19b-3p	NCBP2		hsa-miR-20a-5p	PFKP		hsa-miR-21-5p	SMC1A
ATXN2L				hsa-let-7a-5p	ARID3B																							hsa-miR-16-5p	AAAS		hsa-miR-19b-3p	MFF		hsa-miR-20a-5p	REEP3		hsa-miR-21-5p	ST6GAL1
POLR3D				hsa-let-7a-5p	MPL																							hsa-miR-16-5p	TPM2		hsa-miR-19b-3p	ARRDC3		hsa-miR-20a-5p	ZNF12		hsa-miR-21-5p	TSNAX
ATXN7L3				hsa-let-7a-5p	RAVER1																							hsa-miR-16-5p	SNX16		hsa-miR-19b-3p	RNF11		hsa-miR-20a-5p	RAN		hsa-miR-21-5p	MAP3K2
BAZ1B				hsa-let-7a-5p	GGA3																							hsa-miR-16-5p	GRWD1		hsa-miR-19b-3p	CCND2		hsa-miR-20a-5p	MIDN		hsa-miR-21-5p	TGIF1
FARSA				hsa-let-7a-5p	HERPUD1																							hsa-miR-16-5p	NEURL4		hsa-miR-19b-3p	CHEK1		hsa-miR-20a-5p	PYGB		hsa-miR-21-5p	LIN7C
PPP1R15B				hsa-let-7a-5p	TAF9B																							hsa-miR-16-5p	CHEK1		hsa-miR-19b-3p	RPF2		hsa-miR-20a-5p	C11orf30		hsa-miR-21-5p	C15orf52
FAM13C				hsa-let-7a-5p	ACER2																							hsa-miR-16-5p	SEC61A1		hsa-miR-19b-3p	PRR14L		hsa-miR-20a-5p	BNIP2		hsa-miR-21-5p	RNF11
RRAD				hsa-let-7a-5p	DIABLO																							hsa-miR-16-5p	PSME4		hsa-miR-19b-3p	SLC4A7		hsa-miR-20a-5p	CPOX		hsa-miR-21-5p	CBX4
SF3A1				hsa-let-7a-5p	FNDC3A																							hsa-miR-16-5p	RNF217		hsa-miR-19b-3p	KIAA1468		hsa-miR-20a-5p	C1orf50		hsa-miR-21-5p	CCL20
HUWE1				hsa-let-7a-5p	NUP155																							hsa-miR-16-5p	PTGS2		hsa-miR-19b-3p	HIPK1		hsa-miR-20a-5p	SEPT2		hsa-miR-21-5p	SEMA5A
ANO6				hsa-let-7a-5p	ZNF611																							hsa-miR-16-5p	ZNF638		hsa-miR-19b-3p	CUL5		hsa-miR-20a-5p	MECP2		hsa-miR-21-5p	PDCD4
MIB1				hsa-let-7a-5p	TSC22D2																							hsa-miR-16-5p	TBPL1		hsa-miR-19b-3p	HNRNPUL1		hsa-miR-20a-5p	CD28		hsa-miR-21-5p	SP1
SLC16A9				hsa-let-7a-5p	HAND1																							hsa-miR-16-5p	HCFC2		hsa-miR-19b-3p	RASSF2		hsa-miR-20a-5p	PTP4A1		hsa-miR-21-5p	PHTF1
CDKAL1				hsa-let-7a-5p	PMAIP1																							hsa-miR-16-5p	PLAG1		hsa-miR-19b-3p	SEC61A1		hsa-miR-20a-5p	FXYD5		hsa-miR-21-5p	PTEN
NF2				hsa-let-7a-5p	ATP6V1G1																							hsa-miR-16-5p	CDC37L1		hsa-miR-19b-3p	IMPDH1		hsa-miR-20a-5p	ZMYM1		hsa-miR-21-5p	CXCL10
NFATC2IP				hsa-let-7a-5p	FAM105A																							hsa-miR-16-5p	NTHL1		hsa-miR-19b-3p	PDRG1		hsa-miR-20a-5p	TMBIM6		hsa-miR-21-5p	SPIN1
KMT2D				hsa-let-7a-5p	EZH2																							hsa-miR-16-5p	CDV3		hsa-miR-19b-3p	BCL7A		hsa-miR-20a-5p	GIGYF1		hsa-miR-21-5p	TIMP3
BSDC1				hsa-let-7a-5p	NDUFS2																							hsa-miR-16-5p	AKR1B10		hsa-miR-19b-3p	NICN1		hsa-miR-20a-5p	ADAR		hsa-miR-21-5p	CYBRD1
TNFSF9				hsa-let-7a-5p	PHTF2																							hsa-miR-16-5p	CBX4		hsa-miR-19b-3p	ATPAF1		hsa-miR-20a-5p	RPS27A		hsa-miR-21-5p	CBX4
C9orf37				hsa-let-7a-5p	MTUS1																							hsa-miR-16-5p	STRADB		hsa-miR-19b-3p	RAP2C		hsa-miR-20a-5p	C4orf29		hsa-miR-21-5p	RASA1
COX6B1				hsa-let-7a-5p	TMED5																							hsa-miR-16-5p	TMEM251		hsa-miR-19b-3p	ATG16L1		hsa-miR-20a-5p	SOX4		hsa-miR-21-5p	FBXL2
C1RL				hsa-let-7a-5p	PRIM2																							hsa-miR-16-5p	CCDC58		hsa-miR-19b-3p	KIF13A		hsa-miR-20a-5p	NAP1L1		hsa-miR-21-5p	TGFBI
KCTD1				hsa-let-7a-5p	BPTF																							hsa-miR-16-5p	ZNRF3		hsa-miR-19b-3p	KLHL3		hsa-miR-20a-5p	C9orf40		hsa-miR-21-5p	DOCK5
NAT8L				hsa-let-7a-5p	RAB11FIP4																							hsa-miR-16-5p	C16orf72		hsa-miR-19b-3p	PLEKHF2		hsa-miR-20a-5p	SLC25A33		hsa-miR-21-5p	UBR3
BMPR1B				hsa-let-7a-5p	EFHD2																							hsa-miR-16-5p	LAMTOR1		hsa-miR-19b-3p	TGFBR2		hsa-miR-20a-5p	LAMTOR1		hsa-miR-21-5p	ICAM1
GNG5				hsa-let-7a-5p	CARHSP1																							hsa-miR-16-5p	PDXK		hsa-miR-19b-3p	BACE1		hsa-miR-20a-5p	TNFAIP1		hsa-miR-21-5p	DMTF1
KCTD21				hsa-let-7a-5p	RBM12B																							hsa-miR-16-5p	ASPH		hsa-miR-19b-3p	ZNF800		hsa-miR-20a-5p	B2M		hsa-miR-21-5p	GDF5
MAPK6				hsa-let-7a-5p	GPM6B																							hsa-miR-16-5p	TSPAN3		hsa-miR-19b-3p	STX6		hsa-miR-20a-5p	ZNF264		hsa-miR-21-5p	RMND5A
CD2AP				hsa-let-7a-5p	SMC1A																							hsa-miR-16-5p	ASH1L		hsa-miR-19b-3p	PRKAA1		hsa-miR-20a-5p	KATNAL1		hsa-miR-21-5p	PTEN
ZNF555				hsa-let-7a-5p	IGF1R																							hsa-miR-16-5p	YBX3		hsa-miR-19b-3p	KLHDC2		hsa-miR-20a-5p	WWC1		hsa-miR-21-5p	TAF5
ITGB3				hsa-let-7a-5p	DICER1																							hsa-miR-16-5p	RUNDC3B		hsa-miR-19b-3p	HNRNPA1		hsa-miR-20a-5p	TRIM8		hsa-miR-21-5p	TPM1
BCOR				hsa-let-7a-5p	DTX3L																							hsa-miR-16-5p	PIM1		hsa-miR-19b-3p	SMAD5		hsa-miR-20a-5p	CDKN1A		hsa-miR-21-5p	RSF1
ATG9A				hsa-let-7a-5p	CNBP																							hsa-miR-16-5p	CDCA8		hsa-miR-19b-3p	CD164		hsa-miR-20a-5p	FNBP1L		hsa-miR-21-5p	B3GALNT1
DYNC2H1				hsa-let-7a-5p	IGF1R																							hsa-miR-16-5p	SPATA2		hsa-miR-19b-3p	CCNA2		hsa-miR-20a-5p	SEC23A		hsa-miR-21-5p	PTEN
HIST1H2BD				hsa-let-7a-5p	MED13L																							hsa-miR-16-5p	LUZP1		hsa-miR-19b-3p	GRSF1		hsa-miR-20a-5p	SPCS1		hsa-miR-21-5p	PIK3C2A
BNIP3L				hsa-let-7a-5p	PARP16																							hsa-miR-16-5p	FSCN2		hsa-miR-19b-3p	STAT5B		hsa-miR-20a-5p	C18orf32		hsa-miR-21-5p	STXBP5
NOLC1				hsa-let-7a-5p	TMEM165																							hsa-miR-16-5p	PRRC2C		hsa-miR-19b-3p	PTP4A1		hsa-miR-20a-5p	ACVR1B		hsa-miR-21-5p	SYNE2
CASP3				hsa-let-7a-5p	HNRNPDL																							hsa-miR-16-5p	TNFAIP2		hsa-miR-19b-3p	CLOCK		hsa-miR-20a-5p	GNS		hsa-miR-21-5p	NKTR
ADIPOR2				hsa-let-7a-5p	MBD2																							hsa-miR-16-5p	PNP		hsa-miR-19b-3p	MB21D1		hsa-miR-20a-5p	PFKP		hsa-miR-21-5p	TGFBR2
PDP2				hsa-let-7a-5p	MTX3																							hsa-miR-16-5p	PRKCD		hsa-miR-19b-3p	RAB5B		hsa-miR-20a-5p	ZBTB7A		hsa-miR-21-5p	FASLG
F2R				hsa-let-7a-5p	C19orf53																							hsa-miR-16-5p	JUN		hsa-miR-19b-3p	SMG1		hsa-miR-20a-5p	KPNA2		hsa-miR-21-5p	UBR5
DUSP1				hsa-let-7a-5p	COPZ1																							hsa-miR-16-5p	SLC35B2		hsa-miR-19b-3p	ATXN1		hsa-miR-20a-5p	UBE2C		hsa-miR-21-5p	TPM1
PAXBP1				hsa-let-7a-5p	MXD1																							hsa-miR-16-5p	RIMS3		hsa-miR-19b-3p	ESR1		hsa-miR-20a-5p	CCND1		hsa-miR-21-5p	APPL1
CS				hsa-let-7a-5p	ZBTB5																							hsa-miR-16-5p	FCF1		hsa-miR-19b-3p	ANKRD52		hsa-miR-20a-5p	BBX		hsa-miR-21-5p	KLHL42
TXLNA				hsa-let-7a-5p	AIDA																							hsa-miR-16-5p	DIABLO		hsa-miR-19b-3p	DICER1		hsa-miR-20a-5p	EXO5		hsa-miR-21-5p	JMY
ZNF578				hsa-let-7a-5p	CRY2																							hsa-miR-16-5p	ABHD2		hsa-miR-19b-3p	PTPRB		hsa-miR-20a-5p	RABEP1		hsa-miR-21-5p	PRICKLE2
RPS24				hsa-let-7a-5p	AOC2																							hsa-miR-16-5p	HSPA1B		hsa-miR-19b-3p	PIWIL4		hsa-miR-20a-5p	POLM		hsa-miR-21-5p	ZNF326
PGRMC1				hsa-let-7a-5p	C5orf51																							hsa-miR-16-5p	REL		hsa-miR-19b-3p	UBE2A		hsa-miR-20a-5p	CNOT4		hsa-miR-21-5p	PPARA
LILRB4				hsa-let-7a-5p	GP5																							hsa-miR-16-5p	FAM96B		hsa-miR-19b-3p	CA13		hsa-miR-20a-5p	KLHL28		hsa-miR-21-5p	PIGX
POU3F2				hsa-let-7a-5p	FPR1																							hsa-miR-16-5p	DSCR3		hsa-miR-19b-3p	FAM195A		hsa-miR-20a-5p	MORF4L1		hsa-miR-21-5p	GPR64
ARIH1				hsa-let-7a-5p	IGF2BP3																							hsa-miR-16-5p	FGFR4		hsa-miR-19b-3p	AGPAT5		hsa-miR-20a-5p	ZNF280B		hsa-miR-21-5p	RPS7
EIF4A3				hsa-let-7a-5p	YWHAZ																							hsa-miR-16-5p	AUP1		hsa-miR-19b-3p	ENPP5		hsa-miR-20a-5p	ORMDL3		hsa-miR-21-5p	TRAPPC2
BCL2				hsa-let-7a-5p	RAB19																							hsa-miR-16-5p	ABCB7		hsa-miR-19b-3p	RRAGD		hsa-miR-20a-5p	MIDN		hsa-miR-21-5p	PTEN
PREB				hsa-let-7a-5p	ZNF264																							hsa-miR-16-5p	TAF13		hsa-miR-19b-3p	ZDHHC7		hsa-miR-20a-5p	TIMM17A		hsa-miR-21-5p	THOC2
TGOLN2				hsa-let-7a-5p	RBFOX2																							hsa-miR-16-5p	MSL1		hsa-miR-19b-3p	RAPGEF2		hsa-miR-20a-5p	FXYD5		hsa-miR-21-5p	PTEN
HMGN2				hsa-let-7a-5p	SOD2																							hsa-miR-16-5p	BCL2		hsa-miR-19b-3p	PATL1		hsa-miR-20a-5p	HAUS8		hsa-miR-21-5p	PURG
NCOA3				hsa-let-7a-5p	BCL2L11																							hsa-miR-16-5p	CDC5L		hsa-miR-19b-3p	ADRM1		hsa-miR-20a-5p	ANKRD13C		hsa-miR-21-5p	USP34
PEG10				hsa-let-7a-5p	C5orf51																							hsa-miR-16-5p	PGD		hsa-miR-19b-3p	SMAD4		hsa-miR-20a-5p	SH3BP5		hsa-miR-21-5p	PITHD1
PLOD1				hsa-let-7a-5p	SDR42E1																							hsa-miR-16-5p	RPRD2		hsa-miR-19b-3p	SUZ12		hsa-miR-20a-5p	ABCA3		hsa-miR-21-5p	RDH11
ADSL				hsa-let-7a-5p	SKA3																							hsa-miR-16-5p	GPAM		hsa-miR-19b-3p	HNRNPF		hsa-miR-20a-5p	ARHGEF18		hsa-miR-21-5p	BCL2
C9orf156				hsa-let-7a-5p	CCR7																							hsa-miR-16-5p	SYT11		hsa-miR-19b-3p	SERINC3		hsa-miR-20a-5p	NRAS		hsa-miR-21-5p	PHACTR2
H1F0				hsa-let-7a-5p	ZCCHC9																							hsa-miR-16-5p	CDCA4		hsa-miR-19b-3p	MTMR6		hsa-miR-20a-5p	SORCS2		hsa-miR-21-5p	MRAP2
UBE3C				hsa-let-7a-5p	KPNA5																							hsa-miR-16-5p	CHP1		hsa-miR-19b-3p	MED28		hsa-miR-20a-5p	E2F1		hsa-miR-21-5p	OTUD1
FXN				hsa-let-7a-5p	TRIM71																							hsa-miR-16-5p	ATP5G3		hsa-miR-19b-3p	MB21D2		hsa-miR-20a-5p	FBXO21		hsa-miR-21-5p	PTEN
IARS				hsa-let-7a-5p	CD59																							hsa-miR-16-5p	UGDH		hsa-miR-19b-3p	ZFAND5		hsa-miR-20a-5p	CPS1		hsa-miR-21-5p	POLR3B
CDC25B				hsa-let-7a-5p	HAS2																							hsa-miR-16-5p	CCT6B		hsa-miR-19b-3p	MMGT1		hsa-miR-20a-5p	CCND2		hsa-miR-21-5p	HIC2
VGLL4				hsa-let-7a-5p	HOXB4																							hsa-miR-16-5p	AGO2		hsa-miR-19b-3p	HHEX		hsa-miR-20a-5p	PLEKHM3		hsa-miR-21-5p	RECK
RPL5				hsa-let-7a-5p	UBXN2B																							hsa-miR-16-5p	PLRG1		hsa-miR-19b-3p	ACSL4		hsa-miR-20a-5p	ORAI1		hsa-miR-21-5p	SLAIN2
RPL21				hsa-let-7a-5p	MRS2																							hsa-miR-16-5p	RNF138		hsa-miR-19b-3p	TNRC6A		hsa-miR-20a-5p	RORA		hsa-miR-21-5p	DCP1A
EEF1A1				hsa-let-7a-5p	EDEM3																							hsa-miR-16-5p	PPIG		hsa-miR-19b-3p	ZFHX4		hsa-miR-20a-5p	ICA1L		hsa-miR-21-5p	HOXA9
UBA2				hsa-let-7a-5p	PCGF3																							hsa-miR-16-5p	BAG4		hsa-miR-19b-3p	RAP2C		hsa-miR-20a-5p	SP4		hsa-miR-21-5p	DOCK7
FGFR3				hsa-let-7a-5p	ACTB																							hsa-miR-16-5p	G3BP2		hsa-miR-19b-3p	MAP3K9		hsa-miR-20a-5p	PLAGL2		hsa-miR-21-5p	NEK1
RPL10				hsa-let-7a-5p	C1orf210																							hsa-miR-16-5p	BAMBI		hsa-miR-19b-3p	CNOT6		hsa-miR-20a-5p	PKD1		hsa-miR-21-5p	BTG2
TM9SF3				hsa-let-7a-5p	RBFOX2																							hsa-miR-16-5p	AUP1		hsa-miR-19b-3p	FAM46C		hsa-miR-20a-5p	BRI3BP		hsa-miR-21-5p	PLAT
PFN2				hsa-let-7a-5p	ZNF584																							hsa-miR-16-5p	C6orf106		hsa-miR-19b-3p	SDE2		hsa-miR-20a-5p	UXS1		hsa-miR-21-5p	DDX46
ATP1A2				hsa-let-7a-5p	PAQR5																							hsa-miR-16-5p	ACTR3B		hsa-miR-19b-3p	NFIB		hsa-miR-20a-5p	RTN2		hsa-miR-21-5p	SASH1
N4BP2				hsa-let-7a-5p	CCNT2																							hsa-miR-16-5p	C16orf72		hsa-miR-19b-3p	PTCD2		hsa-miR-20a-5p	ZNF107		hsa-miR-21-5p	PTEN
TERF2IP				hsa-let-7a-5p	CNTRL																							hsa-miR-16-5p	GRB2		hsa-miR-19b-3p	MKL2		hsa-miR-20a-5p	DPYSL2		hsa-miR-21-5p	AP3M1
RIOK2				hsa-let-7a-5p	RPL30																							hsa-miR-16-5p	FAM155B		hsa-miR-19b-3p	RAN		hsa-miR-20a-5p	CHIC1		hsa-miR-21-5p	PTEN
GOSR1				hsa-let-7a-5p	OPA3																							hsa-miR-16-5p	UNG		hsa-miR-19b-3p	DNAJA2		hsa-miR-20a-5p	C15orf40		hsa-miR-21-5p	GNB4
USP1				hsa-let-7a-5p	TRIO																							hsa-miR-16-5p	MFN2		hsa-miR-19b-3p	CCNA2		hsa-miR-20a-5p	DCAF8		hsa-miR-21-5p	TIMP3
MAP7D1				hsa-let-7a-5p	DVL3																							hsa-miR-16-5p	ATXN7L3		hsa-miR-19b-3p	BRWD1		hsa-miR-20a-5p	ICMT		hsa-miR-21-5p	SNRK
FLT1				hsa-let-7a-5p	FKBP8																							hsa-miR-16-5p	ARL2		hsa-miR-19b-3p	TFB1M		hsa-miR-20a-5p	ZNF264		hsa-miR-21-5p	REST
INSIG1				hsa-let-7a-5p	PM20D2																							hsa-miR-16-5p	CCT8		hsa-miR-19b-3p	CNOT7		hsa-miR-20a-5p	NUDT3		hsa-miR-21-5p	PCBP1
FOXP1				hsa-let-7a-5p	LYN																							hsa-miR-16-5p	CDKN2A		hsa-miR-19b-3p	VAMP3		hsa-miR-20a-5p	ARHGAP12		hsa-miR-21-5p	DNAJC16
MTOR				hsa-let-7a-5p	GTF3C5																							hsa-miR-16-5p	GCC1		hsa-miR-19b-3p	SHCBP1		hsa-miR-20a-5p	RTFDC1		hsa-miR-21-5p	SLC5A3
RPL31				hsa-let-7a-5p	AMMECR1																							hsa-miR-16-5p	PISD		hsa-miR-19b-3p	MID1IP1		hsa-miR-20a-5p	BTF3L4		hsa-miR-21-5p	GPD1L
AKT1				hsa-let-7a-5p	UHRF1																							hsa-miR-16-5p	PRDM4		hsa-miR-19b-3p	PTBP2		hsa-miR-20a-5p	KMT2B		hsa-miR-21-5p	PDCD4
SMG1				hsa-let-7a-5p	GOLGA4																							hsa-miR-16-5p	UGDH		hsa-miR-19b-3p	MBNL3		hsa-miR-20a-5p	PXK		hsa-miR-21-5p	TMEM2
MKLN1				hsa-let-7a-5p	RANBP2																							hsa-miR-16-5p	PLEKHN1		hsa-miR-19b-3p	SLMAP		hsa-miR-20a-5p	ANKH		hsa-miR-21-5p	AKT2
KANK1				hsa-let-7a-5p	KIAA0930																							hsa-miR-16-5p	YWHAQ		hsa-miR-19b-3p	ADRM1		hsa-miR-20a-5p	KIAA1841		hsa-miR-21-5p	SMN1
SMARCA5				hsa-let-7a-5p	SP1																							hsa-miR-16-5p	PLRG1		hsa-miR-19b-3p	QKI		hsa-miR-20a-5p	PCNXL4		hsa-miR-21-5p	OSBPL1A
LRRC41				hsa-let-7a-5p	FIGN																							hsa-miR-16-5p	C17orf80		hsa-miR-19b-3p	SLC9A6		hsa-miR-20a-5p	NPAT		hsa-miR-21-5p	PITHD1
RPL39L				hsa-let-7a-5p	GPN1																							hsa-miR-16-5p	SUPT16H		hsa-miR-19b-3p	RAPGEF4		hsa-miR-20a-5p	ISOC1		hsa-miR-21-5p	KLF9
ABLIM1				hsa-let-7a-5p	ITGA3																							hsa-miR-16-5p	KMT2A		hsa-miR-19b-3p	ADSS		hsa-miR-20a-5p	FEM1C		hsa-miR-21-5p	TGFBI
H2AFV				hsa-let-7a-5p	YOD1																							hsa-miR-16-5p	HSPE1-MOB4		hsa-miR-19b-3p	C15orf38-AP3S2		hsa-miR-20a-5p	CNOT6L		hsa-miR-21-5p	TNFRSF10B
SAT1				hsa-let-7a-5p	CTDP1																							hsa-miR-16-5p	LANCL1		hsa-miR-19b-3p	GMFB		hsa-miR-20a-5p	TMEM167A		hsa-miR-21-5p	PTPN3
KLHL15				hsa-let-7a-5p	ABT1																							hsa-miR-16-5p	ATG9A		hsa-miR-19b-3p	FRMD6		hsa-miR-20a-5p	TMEM127		hsa-miR-21-5p	PDCD4
ATP5A1				hsa-let-7a-5p	ATXN7L3B																							hsa-miR-16-5p	ELK4		hsa-miR-19b-3p	SLC30A7		hsa-miR-20a-5p	EIF2B2		hsa-miR-21-5p	SAR1A
NOP2				hsa-let-7a-5p	G2E3																							hsa-miR-16-5p	TBRG4		hsa-miR-19b-3p	SEMA4C		hsa-miR-20a-5p	PURA		hsa-miR-21-5p	SPRY4
C9orf66				hsa-let-7a-5p	IGF2BP1																							hsa-miR-16-5p	EIF4B		hsa-miR-19b-3p	CD2AP		hsa-miR-20a-5p	TNKS2		hsa-miR-21-5p	CENPQ
SNX4				hsa-let-7a-5p	MSI2																							hsa-miR-16-5p	CCNE1		hsa-miR-19b-3p	SRSF7		hsa-miR-20a-5p	ZBTB4		hsa-miR-21-5p	NFAT5
APEX1				hsa-let-7a-5p	MFSD8																							hsa-miR-16-5p	IARS		hsa-miR-19b-3p	ATP6V0E1		hsa-miR-20a-5p	MKNK2		hsa-miR-21-5p	TOPORS
DDX21				hsa-let-7a-5p	DDX18																							hsa-miR-16-5p	AMOT		hsa-miR-19b-3p	GPAM		hsa-miR-20a-5p	CROT		hsa-miR-21-5p	JPH1
MITD1				hsa-let-7a-5p	ATP6V1F																							hsa-miR-16-5p	MAFK		hsa-miR-19b-3p	ZBTB18		hsa-miR-20a-5p	KCNA7		hsa-miR-21-5p	PDCD4
RAD51C				hsa-let-7a-5p	CD276																							hsa-miR-16-5p	PPA1		hsa-miR-19b-3p	BRWD1		hsa-miR-20a-5p	AKR7A2		hsa-miR-21-5p	WHSC1
APBA3				hsa-let-7a-5p	DNAJC28																							hsa-miR-16-5p	ZEB2		hsa-miR-19b-3p	MAP7		hsa-miR-20a-5p	SMAD4		hsa-miR-21-5p	PHIP
CCZ1B				hsa-let-7a-5p	PHF6																							hsa-miR-16-5p	TCP1		hsa-miR-19b-3p	RAB5B		hsa-miR-20a-5p	SP4		hsa-miR-21-5p	SAR1A
S100A10				hsa-let-7a-5p	HMGA2																							hsa-miR-16-5p	NFKB1		hsa-miR-19b-3p	RPS4Y1		hsa-miR-20a-5p	TM4SF5		hsa-miR-21-5p	SKP2
PTPLAD1				hsa-let-7a-5p	HERPUD1																							hsa-miR-16-5p	LYAR		hsa-miR-19b-3p	ADSS		hsa-miR-20a-5p	CNOT7		hsa-miR-21-5p	PTEN
XRCC5				hsa-let-7a-5p	MBD2																							hsa-miR-16-5p	LITAF		hsa-miR-19b-3p	ZDHHC7		hsa-miR-20a-5p	RBM41		hsa-miR-21-5p	LIFR
HIST1H4C				hsa-let-7a-5p	AMPD2																							hsa-miR-16-5p	SMAD7		hsa-miR-19b-3p	VPS37A		hsa-miR-20a-5p	TOMM20		hsa-miR-21-5p	PPARA
EGR2				hsa-let-7a-5p	EPHA4																							hsa-miR-16-5p	PNPLA6		hsa-miR-19b-3p	SECISBP2L		hsa-miR-20a-5p	ZNF180		hsa-miR-21-5p	RASGRP3
ATP1B3				hsa-let-7a-5p	FAM83G																							hsa-miR-16-5p	POTEF		hsa-miR-19b-3p	KIAA0907		hsa-miR-20a-5p	SLCO5A1		hsa-miR-21-5p	FASLG
CUL2				hsa-let-7a-5p	TARS																							hsa-miR-16-5p	QSOX2		hsa-miR-19b-3p	NCOA3		hsa-miR-20a-5p	GDF11		hsa-miR-21-5p	GNE
ZNF215				hsa-let-7a-5p	NID2																							hsa-miR-16-5p	SYPL1		hsa-miR-19b-3p	BTBD10		hsa-miR-20a-5p	DNMT1		hsa-miR-21-5p	COX20
RPL14				hsa-let-7a-5p	FUT10																							hsa-miR-16-5p	SQSTM1		hsa-miR-19b-3p	ANKIB1		hsa-miR-20a-5p	MAPK1		hsa-miR-21-5p	PELI1
PSMA5				hsa-let-7a-5p	GABPB1																							hsa-miR-16-5p	SENP6		hsa-miR-19b-3p	ZNF800		hsa-miR-20a-5p	DCTN5		hsa-miR-21-5p	PDCD4
RPS8				hsa-let-7a-5p	SPTBN1																							hsa-miR-16-5p	PCMT1		hsa-miR-19b-3p	DENND6A		hsa-miR-20a-5p	HBP1		hsa-miR-21-5p	RABGAP1
WTIP				hsa-let-7a-5p	CBX5																							hsa-miR-16-5p	SRSF1		hsa-miR-19b-3p	SIVA1		hsa-miR-20a-5p	KLRD1		hsa-miR-21-5p	PTEN
HMGN1				hsa-let-7a-5p	TBC1D19																							hsa-miR-16-5p	RPLP0		hsa-miR-19b-3p	USP34		hsa-miR-20a-5p	SLK		hsa-miR-21-5p	TGFBR2
SRD5A3				hsa-let-7a-5p	PIK3R1																							hsa-miR-16-5p	AADAT		hsa-miR-19b-3p	TXLNG		hsa-miR-20a-5p	USP48		hsa-miR-21-5p	MYCBP2
ACSL3				hsa-let-7a-5p	MDM4																							hsa-miR-16-5p	CBX6		hsa-miR-19b-3p	MID1IP1		hsa-miR-20a-5p	FBXL5		hsa-miR-21-5p	TMEM147
RAB5C				hsa-let-7a-5p	ARL6IP6																							hsa-miR-16-5p	SLC25A6		hsa-miR-19b-3p	SLC9A1		hsa-miR-20a-5p	PHC1		hsa-miR-21-5p	IGF1R
SNRNP27				hsa-let-7a-5p	C19orf47																							hsa-miR-16-5p	FAM189B		hsa-miR-19b-3p	CLIP1		hsa-miR-20a-5p	GAB1		hsa-miR-21-5p	KLK2
SMAD7				hsa-let-7a-5p	SLC11A2																							hsa-miR-16-5p	RCOR1		hsa-miR-19b-3p	CERCAM		hsa-miR-20a-5p	C7orf60		hsa-miR-21-5p	ATP2B4
SOGA1				hsa-let-7a-5p	RAB19																							hsa-miR-16-5p	SESTD1		hsa-miR-19b-3p	EVI5L		hsa-miR-20a-5p	LPHN3		hsa-miR-21-5p	SMAD7
ID1				hsa-let-7a-5p	NDUFAF7																							hsa-miR-16-5p	CEP55		hsa-miR-19b-3p	ATP6V1B2		hsa-miR-20a-5p	ZNF202		hsa-miR-21-5p	FASLG
SAP30L				hsa-let-7a-5p	KPNA5																							hsa-miR-16-5p	FNDC3B		hsa-miR-19b-3p	MSMO1		hsa-miR-20a-5p	SREK1IP1		hsa-miR-21-5p	KIAA1551
CCNYL1				hsa-let-7a-5p	ZNF780A																							hsa-miR-16-5p	CCND3		hsa-miR-19b-3p	RPF2		hsa-miR-20a-5p	ITPKB		hsa-miR-21-5p	JAG1
THAP2				hsa-let-7a-5p	LRRC20																							hsa-miR-16-5p	CCND1		hsa-miR-19b-3p	COX10		hsa-miR-20a-5p	VPS53		hsa-miR-21-5p	NFIB
XRCC6				hsa-let-7a-5p	KIAA1147																							hsa-miR-16-5p	ACOX1		hsa-miR-19b-3p	PDRG1		hsa-miR-20a-5p	CBX1		hsa-miR-21-5p	MIB1
MAFG				hsa-let-7a-5p	KPNA5																							hsa-miR-16-5p	SCAMP4		hsa-miR-19b-3p	HIST2H4A		hsa-miR-20a-5p	ACADSB		hsa-miR-21-5p	DYNC1LI2
SLC17A8				hsa-let-7a-5p	ZNF8																							hsa-miR-16-5p	LMF2		hsa-miR-19b-3p	MED12L		hsa-miR-20a-5p	PXK		hsa-miR-21-5p	BTG2
ESR1				hsa-let-7a-5p	CPA4																							hsa-miR-16-5p	ULK1		hsa-miR-19b-3p	RRAS2		hsa-miR-20a-5p	BTG3		hsa-miR-21-5p	BTG2
ODC1				hsa-let-7a-5p	TSPAN3																							hsa-miR-16-5p	CCNE1		hsa-miR-19b-3p	KLHL11		hsa-miR-20a-5p	SEC16A		hsa-miR-21-5p	PTX3
VPS45				hsa-let-7a-5p	FAM104A																							hsa-miR-16-5p	MRPS23		hsa-miR-19b-3p	TMEM107		hsa-miR-20a-5p	UBE2Q2		hsa-miR-21-5p	ATRX
MAP4				hsa-let-7a-5p	MAPK11																							hsa-miR-16-5p	GABARAPL1		hsa-miR-19b-3p	DIP2A		hsa-miR-20a-5p	CCND1		hsa-miR-21-5p	GK5
PRDX1				hsa-let-7a-5p	HMGA2																							hsa-miR-16-5p	PPAN		hsa-miR-19b-3p	ROR1		hsa-miR-20a-5p	ZBTB4		hsa-miR-21-5p	TOR1AIP2
DAZAP2				hsa-let-7a-5p	CAMK2D																							hsa-miR-16-5p	ATP5A1		hsa-miR-19b-3p	ZNF800		hsa-miR-20a-5p	BTBD7		hsa-miR-21-5p	PDCD4
ORC5				hsa-let-7a-5p	RNF144B																							hsa-miR-16-5p	RARS		hsa-miR-19b-3p	DCAF7		hsa-miR-20a-5p	PGK1		hsa-miR-21-5p	RHOB
LDHB				hsa-let-7a-5p	CIRH1A																							hsa-miR-16-5p	ZFHX4		hsa-miR-19b-3p	ELOVL4		hsa-miR-20a-5p	PTRF		hsa-miR-21-5p	CD47
CAPNS1				hsa-let-7a-5p	ATXN2																							hsa-miR-16-5p	PURA		hsa-miR-19b-3p	EIF3L		hsa-miR-20a-5p	SLC22A23		hsa-miR-21-5p	GID4
DPY19L4				hsa-let-7a-5p	PLCG2																							hsa-miR-16-5p	OGT		hsa-miR-19b-3p	VPS37B		hsa-miR-20a-5p	PRKACB		hsa-miR-21-5p	SPRY2
ORC2				hsa-let-7a-5p	HIST1H2BK																							hsa-miR-16-5p	AFG3L2		hsa-miR-19b-3p	WBP2		hsa-miR-20a-5p	ADAT2		hsa-miR-21-5p	COL4A1
COL4A1				hsa-let-7a-5p	ATXN2L																							hsa-miR-16-5p	RNF144B		hsa-miR-19b-3p	PDE4A		hsa-miR-20a-5p	GNAS		hsa-miR-21-5p	FASLG
DNMT1				hsa-let-7a-5p	POLR3D																							hsa-miR-16-5p	PSAT1		hsa-miR-19b-3p	NUP54		hsa-miR-20a-5p	BRI3BP		hsa-miR-21-5p	PLD1
NSF				hsa-let-7a-5p	ATXN7L3																							hsa-miR-16-5p	TIMP3		hsa-miR-19b-3p	ALG2		hsa-miR-20a-5p	STAT3		hsa-miR-21-5p	AKAP9
ATM				hsa-let-7a-5p	BAZ1B																							hsa-miR-16-5p	PTPRJ		hsa-miR-19b-3p	TNFRSF1B		hsa-miR-20a-5p	ARCN1		hsa-miR-21-5p	PIAS3
TMED4				hsa-let-7a-5p	FARSA																							hsa-miR-16-5p	TMEM189-UBE2V1		hsa-miR-19b-3p	LDLR		hsa-miR-20a-5p	RAB30		hsa-miR-21-5p	DICER1
UBN2				hsa-let-7a-5p	AK4																							hsa-miR-16-5p	FZD6		hsa-miR-19b-3p	PTEN		hsa-miR-20a-5p	SMIM13		hsa-miR-21-5p	BMPR2
BMPR2				hsa-let-7a-5p	PPP1R15B																							hsa-miR-16-5p	PEX14		hsa-miR-19b-3p	GMFB		hsa-miR-20a-5p	MARCH6		hsa-miR-21-5p	STRBP
NUDCD2				hsa-let-7a-5p	ABT1																							hsa-miR-16-5p	GPATCH8		hsa-miR-19b-3p	PPTC7		hsa-miR-20a-5p	BTG3		hsa-miR-21-5p	IPP
PCBP2				hsa-let-7a-5p	FAM13C																							hsa-miR-16-5p	CXorf38		hsa-miR-19b-3p	TRIM2		hsa-miR-20a-5p	LUZP2		hsa-miR-21-5p	TIAM1
RAP1B				hsa-let-7a-5p	PMPCA																							hsa-miR-16-5p	CCDC80		hsa-miR-19b-3p	C11orf57		hsa-miR-20a-5p	KIAA1191		hsa-miR-21-5p	DCAF8
BECN1				hsa-let-7a-5p	RRAD																							hsa-miR-16-5p	MAFK		hsa-miR-19b-3p	WDR45B		hsa-miR-20a-5p	FNBP1L		hsa-miR-21-5p	RSPRY1
OXCT1				hsa-let-7a-5p	SF3A1																							hsa-miR-16-5p	CARD8		hsa-miR-19b-3p	TNRC6B		hsa-miR-20a-5p	ZDHHC20		hsa-miR-21-5p	ATMIN
UBE2E3				hsa-let-7a-5p	STRN																							hsa-miR-16-5p	LARP4		hsa-miR-19b-3p	OTUD1		hsa-miR-20a-5p	TMEM200C		hsa-miR-21-5p	TPM1
HMGB1				hsa-let-7a-5p	HUWE1																							hsa-miR-16-5p	CDC25A		hsa-miR-19b-3p	PPP1R15B		hsa-miR-20a-5p	KCNB1		hsa-miR-21-5p	ATF2
MMP13				hsa-let-7a-5p	ANO6																							hsa-miR-16-5p	E2F7		hsa-miR-19b-3p	ATG5		hsa-miR-20a-5p	GIGYF1		hsa-miR-21-5p	SERPINB5
RPL7A				hsa-let-7a-5p	ZBTB5																							hsa-miR-16-5p	TMEM189		hsa-miR-19b-3p	MECP2		hsa-miR-20a-5p	DUSP2		hsa-miR-21-5p	SLMAP
PANK3				hsa-let-7a-5p	LIN28A																							hsa-miR-16-5p	TARBP2		hsa-miR-19b-3p	SOCS4		hsa-miR-20a-5p	ANKFY1		hsa-miR-21-5p	SLC9A6
PATZ1				hsa-let-7a-5p	MIB1																							hsa-miR-16-5p	TGFBI		hsa-miR-19b-3p	KIF3A		hsa-miR-20a-5p	MRPL13		hsa-miR-21-5p	HNRNPK
UBQLN1				hsa-let-7a-5p	ARID3B																							hsa-miR-16-5p	NUP98		hsa-miR-19b-3p	NDUFB2		hsa-miR-20a-5p	TGFBR2		hsa-miR-21-5p	ITGB8
PRRC2C				hsa-let-7a-5p	MIEF1																							hsa-miR-16-5p	PIK3R1		hsa-miR-19b-3p	WAC		hsa-miR-20a-5p	FBXO10		hsa-miR-21-5p	NAA30
FKBP5				hsa-let-7a-5p	SLC16A9																							hsa-miR-16-5p	CHPT1		hsa-miR-19b-3p	PLEKHF2		hsa-miR-20a-5p	CAPZA2		hsa-miR-21-5p	BTBD7
WDR4				hsa-let-7a-5p	FBXW2																							hsa-miR-16-5p	SCAF4		hsa-miR-19b-3p	NIPA1		hsa-miR-20a-5p	E2F3		hsa-miR-21-5p	RPS7
TAPBP				hsa-let-7a-5p	ATP6V1G1																							hsa-miR-16-5p	KIF23		hsa-miR-19b-3p	NUP54		hsa-miR-20a-5p	RPS10		hsa-miR-21-5p	PALLD
PLK1				hsa-let-7a-5p	C5orf51																							hsa-miR-16-5p	INTS5		hsa-miR-19b-3p	KAT2B		hsa-miR-20a-5p	ZNF180		hsa-miR-21-5p	APC
NCOR2				hsa-let-7a-5p	CDKAL1																							hsa-miR-16-5p	E2F3		hsa-miR-19b-3p	HNRNPF		hsa-miR-20a-5p	PEA15		hsa-miR-21-5p	NKTR
GTPBP1				hsa-let-7a-5p	NF2																							hsa-miR-16-5p	BCL2		hsa-miR-19b-3p	TCF4		hsa-miR-20a-5p	PKMYT1		hsa-miR-21-5p	PDCD4
RAP2C				hsa-let-7a-5p	NUP155																							hsa-miR-16-5p	SLC39A9		hsa-miR-19b-3p	CYP19A1		hsa-miR-20a-5p	NABP1		hsa-miR-21-5p	CALD1
CTDSPL				hsa-let-7a-5p	NFATC2IP																							hsa-miR-16-5p	RPL30		hsa-miR-19b-3p	CSNK1G1		hsa-miR-20a-5p	BCL2L2		hsa-miR-21-5p	VHL
KDELR2				hsa-let-7a-5p	KMT2D																							hsa-miR-16-5p	RAB40B		hsa-miR-19b-3p	RAB34		hsa-miR-20a-5p	MANEAL		hsa-miR-21-5p	PHF17
RPL7				hsa-let-7a-5p	PLEKHO1																							hsa-miR-16-5p	PRR3		hsa-miR-19b-3p	FKBP15		hsa-miR-20a-5p	BSCL2		hsa-miR-21-5p	PTEN
RPL19				hsa-let-7a-5p	BSDC1																							hsa-miR-16-5p	LAMC1		hsa-miR-19b-3p	USP8		hsa-miR-20a-5p	PAK6		hsa-miR-21-5p	TNFRSF10B
MAPK1IP1L				hsa-let-7a-5p	TNFSF9																							hsa-miR-16-5p	NXPH2		hsa-miR-19b-3p	ATP6V1B2		hsa-miR-20a-5p	BCL2L11		hsa-miR-21-5p	ZBTB8A
RB1				hsa-let-7a-5p	C9orf37																							hsa-miR-16-5p	SLC2A3		hsa-miR-19b-3p	PATL1		hsa-miR-20a-5p	PTRF		hsa-miR-21-5p	SOX2
CUL1				hsa-let-7a-5p	KMT2D																							hsa-miR-16-5p	PHC3		hsa-miR-19b-3p	WASL		hsa-miR-20a-5p	ZNF805		hsa-miR-21-5p	YOD1
BCL10				hsa-let-7a-5p	MYC																							hsa-miR-16-5p	TIMM17A		hsa-miR-19b-3p	ZFAND5		hsa-miR-20a-5p	TSG101		hsa-miR-21-5p	VPS36
EDEM1				hsa-let-7a-5p	COX6B1																							hsa-miR-16-5p	ARHGAP12		hsa-miR-19b-3p	FAM102A		hsa-miR-20a-5p	FLNA		hsa-miR-21-5p	RPS7
ANAPC1				hsa-let-7a-5p	POLR2D																							hsa-miR-16-5p	KPNA1		hsa-miR-19b-3p	TTC9C		hsa-miR-20a-5p	EEA1		hsa-miR-21-5p	ITSN2
C21orf91				hsa-let-7a-5p	FIGN																							hsa-miR-16-5p	MCL1		hsa-miR-19b-3p	POGZ		hsa-miR-20a-5p	FOXRED2		hsa-miR-21-5p	CCDC34
HIST2H4B				hsa-let-7a-5p	C1RL																							hsa-miR-16-5p	AP2A1		hsa-miR-19b-3p	STX12		hsa-miR-20a-5p	BCL2L11		hsa-miR-21-5p	TIMP3
MORF4L2				hsa-let-7a-5p	KCTD1																							hsa-miR-16-5p	CEP55		hsa-miR-19b-3p	YTHDF1		hsa-miR-20a-5p	IKZF5		hsa-miR-21-5p	SOX2
GNA13				hsa-let-7a-5p	NAT8L																							hsa-miR-16-5p	SERPINB5		hsa-miR-19b-3p	C16orf70		hsa-miR-20a-5p	BRMS1L		hsa-miR-21-5p	RECK
SF3B3				hsa-let-7a-5p	BMPR1B																							hsa-miR-16-5p	IER3IP1		hsa-miR-19b-3p	ASNA1		hsa-miR-20a-5p	RGMB		hsa-miR-21-5p	FMR1
MRPS33				hsa-let-7a-5p	GNG5																							hsa-miR-16-5p	STIP1		hsa-miR-19b-3p	HMGCS1		hsa-miR-20a-5p	RNASEH1		hsa-miR-21-5p	CSNK1A1
PAPSS1				hsa-let-7a-5p	KCTD21																							hsa-miR-16-5p	DPP8		hsa-miR-19b-3p	RAB14		hsa-miR-20a-5p	NIPA1		hsa-miR-21-5p	FASLG
SEPSECS				hsa-let-7a-5p	MAPK6																							hsa-miR-16-5p	ADORA3		hsa-miR-19b-3p	OTUD4		hsa-miR-20a-5p	OCIAD1		hsa-miR-21-5p	TNFAIP3
QSER1				hsa-let-7a-5p	CD2AP																							hsa-miR-16-5p	CDCA4		hsa-miR-19b-3p	SMAD4		hsa-miR-20a-5p	CXorf38		hsa-miR-21-5p	LMBR1
ORMDL1				hsa-let-7a-5p	ZNF555																							hsa-miR-16-5p	SLC1A5		hsa-miR-19b-3p	HIST2H4B		hsa-miR-20a-5p	FBXL5		hsa-miR-21-5p	PELI1
ALG3				hsa-let-7a-5p	HMGA1																							hsa-miR-16-5p	PSMC1		hsa-miR-19b-3p	UBE2D3		hsa-miR-20a-5p	ZBED1		hsa-miR-21-5p	PTEN
HOXA1				hsa-let-7a-5p	ITGB3																							hsa-miR-16-5p	VEGFA		hsa-miR-19b-3p	DGKH		hsa-miR-20a-5p	PPP1R15B		hsa-miR-21-5p	RECK
NTAN1				hsa-let-7a-5p	EIF4G2																							hsa-miR-16-5p	ARIH1		hsa-miR-19b-3p	ESYT1		hsa-miR-20a-5p	TMEM123		hsa-miR-21-5p	LATS1
SLMO2				hsa-let-7a-5p	BCOR																							hsa-miR-16-5p	ZNF460		hsa-miR-19b-3p	RAB18		hsa-miR-20a-5p	TNFRSF21		hsa-miR-21-5p	PDCD4
RCN2				hsa-let-7a-5p	ATG9A																							hsa-miR-16-5p	TMEM41A		hsa-miR-19b-3p	CASQ1		hsa-miR-20a-5p	ARHGAP12		hsa-miR-21-5p	ZNF367
VCP				hsa-let-7a-5p	DYNC2H1																							hsa-miR-16-5p	PEX12		hsa-miR-19b-3p	ENPP5		hsa-miR-20a-5p	LIMA1		hsa-miR-21-5p	MGA
RLIM				hsa-let-7a-5p	HIST1H2BD																							hsa-miR-16-5p	SLC6A4		hsa-miR-19b-3p	CHD9		hsa-miR-20a-5p	MAK16		hsa-miR-21-5p	TLR4
JPH1				hsa-let-7a-5p	IGF1R																							hsa-miR-16-5p	DNAJA1		hsa-miR-19b-3p	SKIL		hsa-miR-20a-5p	RAB22A		hsa-miR-21-5p	YOD1
NDUFA9				hsa-let-7a-5p	BNIP3L																							hsa-miR-16-5p	GNL3L		hsa-miR-19b-3p	SERINC3		hsa-miR-20a-5p	C9orf78		hsa-miR-21-5p	PRKCE
PAFAH1B1				hsa-let-7a-5p	NOLC1																							hsa-miR-16-5p	VKORC1		hsa-miR-19b-3p	MAPK1		hsa-miR-20a-5p	NRBP1		hsa-miR-21-5p	CDK6
COX5A				hsa-let-7a-5p	IGDCC4																							hsa-miR-16-5p	PPP6C		hsa-miR-19b-3p	PALLD		hsa-miR-20a-5p	WEE1		hsa-miR-21-5p	RAI14
FAM221A				hsa-let-7a-5p	MCF2L2																							hsa-miR-16-5p	B4GALT1		hsa-miR-19b-3p	ALAD		hsa-miR-20a-5p	CLIP4		hsa-miR-21-5p	BDH2
GDE1				hsa-let-7a-5p	CASP3																							hsa-miR-16-5p	VPS33B		hsa-miR-19b-3p	ARHGAP1		hsa-miR-20a-5p	TSG101		hsa-miR-21-5p	RECK
CYR61				hsa-let-7a-5p	ADIPOR2																							hsa-miR-16-5p	KIAA1432		hsa-miR-19b-3p	SMG1		hsa-miR-20a-5p	CLOCK		hsa-miR-21-5p	ELAVL4
PTPN9				hsa-let-7a-5p	PDP2																							hsa-miR-16-5p	CLSPN		hsa-miR-19b-3p	BLCAP		hsa-miR-20a-5p	LGSN		hsa-miR-21-5p	SRSF11
ACTR1B				hsa-let-7a-5p	F2R																							hsa-miR-16-5p	UGP2		hsa-miR-19b-3p	YTHDF1		hsa-miR-20a-5p	FBXO31		hsa-miR-21-5p	PTEN
H2AFY				hsa-let-7a-5p	DUSP1																							hsa-miR-16-5p	PSMD11		hsa-miR-19b-3p	NRBF2		hsa-miR-20a-5p	NCOR2		hsa-miR-21-5p	PRPF39
MARC1				hsa-let-7a-5p	MIEF1																							hsa-miR-16-5p	STK38		hsa-miR-19b-3p	PRICKLE2		hsa-miR-20a-5p	RCCD1		hsa-miR-21-5p	RP2
CTDSPL2				hsa-let-7a-5p	PAXBP1																							hsa-miR-16-5p	BZW1		hsa-miR-19b-3p	TMEM45A		hsa-miR-20a-5p	LAMTOR1		hsa-miR-21-5p	EXOC5
RHPN2				hsa-let-7a-5p	GRPEL2																							hsa-miR-16-5p	PDCD4		hsa-miR-19b-3p	NIPA1		hsa-miR-20a-5p	RAB5B		hsa-miR-21-5p	SPATS2L
RPL7L1				hsa-let-7a-5p	CS																							hsa-miR-16-5p	GALNT1		hsa-miR-19b-3p	DCC		hsa-miR-20a-5p	MAP3K2		hsa-miR-21-5p	TNPO1
PCBP1				hsa-let-7a-5p	SLC20A1																							hsa-miR-16-5p	PRKAR1A		hsa-miR-19b-3p	CAMSAP2		hsa-miR-20a-5p	F2RL1		hsa-miR-21-5p	CCR7
RAB33B				hsa-let-7a-5p	TXLNA																							hsa-miR-16-5p	ATP5C1		hsa-miR-19b-3p	DMXL2		hsa-miR-20a-5p	MYLIP		hsa-miR-21-5p	ZNF207
EIF5A				hsa-let-7a-5p	ZNF578																							hsa-miR-16-5p	SLC1A5		hsa-miR-19b-3p	IMPDH1		hsa-miR-20a-5p	FAM129A		hsa-miR-21-5p	DAXX
TEX264				hsa-let-7a-5p	MYC																							hsa-miR-16-5p	ARCN1		hsa-miR-19b-3p	PTEN		hsa-miR-20a-5p	RRAGD		hsa-miR-21-5p	KRIT1
CAMKK2				hsa-let-7a-5p	RPS24																							hsa-miR-16-5p	GARS		hsa-miR-19b-3p	ARHGEF26		hsa-miR-20a-5p	HBP1		hsa-miR-21-5p	FKBP5
AP3M1				hsa-let-7a-5p	PGRMC1																							hsa-miR-16-5p	JARID2		hsa-miR-19b-3p	CLIP1		hsa-miR-20a-5p	ZNF706		hsa-miR-21-5p	SGTB
CREBBP				hsa-let-7a-5p	LILRB4																							hsa-miR-16-5p	SNRPB2		hsa-miR-19b-3p	GPR137B		hsa-miR-20a-5p	PLS1		hsa-miR-21-5p	TMEM170A
ALDH9A1				hsa-let-7a-5p	CD59																							hsa-miR-16-5p	FECH		hsa-miR-19b-3p	YY1		hsa-miR-20a-5p	C7orf43		hsa-miR-21-5p	GAPVD1
KPNA2				hsa-let-7a-5p	POU3F2																							hsa-miR-16-5p	AKT3		hsa-miR-19b-3p	ATG2B		hsa-miR-20a-5p	RBM10		hsa-miR-21-5p	PDCD4
CUL5				hsa-let-7a-5p	GRPEL2																							hsa-miR-16-5p	LMO7		hsa-miR-19b-3p	ATP6V1B2		hsa-miR-20a-5p	ELAVL2		hsa-miR-21-5p	BOC
GFOD1				hsa-let-7a-5p	ARIH1																							hsa-miR-16-5p	MRPL40		hsa-miR-19b-3p	RDH11		hsa-miR-20a-5p	TRIOBP		hsa-miR-21-5p	TCEANC2
CBX3				hsa-let-7a-5p	EIF4A3																							hsa-miR-16-5p	JARID2		hsa-miR-19b-3p	CCSER2		hsa-miR-20a-5p	ZRANB1		hsa-miR-21-5p	SLMAP
RPS15				hsa-let-7a-5p	BCL2																							hsa-miR-16-5p	ARHGDIA		hsa-miR-19b-3p	TRPC3		hsa-miR-20a-5p	ACOX1		hsa-miR-21-5p	KIFAP3
ARPP19				hsa-let-7a-5p	PREB																							hsa-miR-16-5p	USMG5		hsa-miR-19b-3p	SOX4		hsa-miR-20a-5p	SCAMP2		hsa-miR-21-5p	RASGRP1
DCAF6				hsa-let-7a-5p	TGOLN2																							hsa-miR-16-5p	CLEC2D		hsa-miR-19b-3p	C11orf57		hsa-miR-20a-5p	ABHD2		hsa-miR-21-5p	LYRM7
HS3ST2				hsa-let-7a-5p	HMGN2																							hsa-miR-16-5p	DTD1		hsa-miR-19b-3p	ZFYVE9		hsa-miR-20a-5p	ANKRD33B		hsa-miR-21-5p	PDCD4
EIF5AL1				hsa-let-7a-5p	C11orf57																							hsa-miR-16-5p	TMEM69		hsa-miR-19b-3p	SGK1		hsa-miR-20a-5p	MYO1D		hsa-miR-21-5p	RNF111
TCP1				hsa-let-7a-5p	NCOA3																							hsa-miR-16-5p	TFAP2A		hsa-miR-19b-3p	COQ10B		hsa-miR-20a-5p	RAB5B		hsa-miR-21-5p	TIAM1
DOLK				hsa-let-7a-5p	PEG10																							hsa-miR-16-5p	NAPG		hsa-miR-19b-3p	PPP6R1		hsa-miR-20a-5p	TMEM127		hsa-miR-21-5p	USP7
DDAH1				hsa-let-7a-5p	ZNF200																							hsa-miR-16-5p	MAP7		hsa-miR-19b-3p	QKI		hsa-miR-20a-5p	MAVS		hsa-miR-21-5p	WSB1
NLRP3				hsa-let-7a-5p	PLOD1																							hsa-miR-16-5p	ZNF622		hsa-miR-19b-3p	MAPK1		hsa-miR-20a-5p	ATAT1		hsa-miR-21-5p	PDCD4
OXA1L				hsa-let-7a-5p	ADSL																							hsa-miR-16-5p	KLF14		hsa-miR-19b-3p	SOCS1		hsa-miR-20a-5p	ORMDL3		hsa-miR-21-5p	CLOCK
HIST2H2AA3				hsa-let-7a-5p	C9orf156																							hsa-miR-16-5p	SUN1		hsa-miR-19b-3p	BCL2L11		hsa-miR-20a-5p	ANKRD12		hsa-miR-21-5p	PBX1
DCBLD1				hsa-let-7a-5p	H1F0																							hsa-miR-16-5p	USP48		hsa-miR-19b-3p	TP53		hsa-miR-20a-5p	PDPK1		hsa-miR-21-5p	STAT3
GRB2				hsa-let-7a-5p	UBE3C																							hsa-miR-16-5p	KLHL15		hsa-miR-19b-3p	BTF3L4		hsa-miR-20a-5p	ZNF514		hsa-miR-21-5p	WNK1
NDUFC2				hsa-let-7a-5p	HIST1H2BD																							hsa-miR-16-5p	BZW1		hsa-miR-19b-3p	DAAM2		hsa-miR-20a-5p	PRRG4		hsa-miR-21-5p	PDCD4
NIP7				hsa-let-7a-5p	FXN																							hsa-miR-16-5p	ANAPC16		hsa-miR-19b-3p	GCM1		hsa-miR-20a-5p	GLO1		hsa-miR-21-5p	BCAT1
RPL15				hsa-let-7a-5p	IARS																							hsa-miR-16-5p	ELOVL1		hsa-miR-19b-3p	ZNF134		hsa-miR-20a-5p	CCND1		hsa-miR-21-5p	RPS7
RARS				hsa-let-7a-5p	AKAP8																							hsa-miR-16-5p	TMEM245		hsa-miR-19b-3p	WDR33		hsa-miR-20a-5p	ANKH		hsa-miR-21-5p	PTEN
SET				hsa-let-7a-5p	CDC25B																							hsa-miR-16-5p	MOB4		hsa-miR-19b-3p	KLHL20		hsa-miR-20a-5p	TNFRSF10B		hsa-miR-21-5p	PGRMC2
NDE1				hsa-let-7a-5p	VGLL4																							hsa-miR-16-5p	ARHGDIA		hsa-miR-19b-3p	ARHGAP12		hsa-miR-20a-5p	RAB11FIP1		hsa-miR-21-5p	MYD88
RPLP1																												hsa-miR-16-5p	B3GNT2		hsa-miR-19b-3p	LCLAT1		hsa-miR-20a-5p	KIAA0101		hsa-miR-21-5p	RAB22A
HSPA14																												hsa-miR-16-5p	ATXN7L3B		hsa-miR-19b-3p	FBLIM1		hsa-miR-20a-5p	FBXL5		hsa-miR-21-5p	RECK
MBIP																												hsa-miR-16-5p	MPDU1		hsa-miR-19b-3p	SEC61A1		hsa-miR-20a-5p	ZNF12		hsa-miR-21-5p	GTF2A1
SGTB																												hsa-miR-16-5p	CDK6		hsa-miR-19b-3p	AFTPH		hsa-miR-20a-5p	AGO3		hsa-miR-21-5p	SNX30
YTHDC1																												hsa-miR-16-5p	KPNA1		hsa-miR-19b-3p	RAN		hsa-miR-20a-5p	STAT3		hsa-miR-21-5p	EIF1AX
TMEM30A																												hsa-miR-16-5p	ZNF622		hsa-miR-19b-3p	COX10		hsa-miR-20a-5p	PDRG1		hsa-miR-21-5p	ACTR2
AGPAT3																												hsa-miR-16-5p	DNAJA1		hsa-miR-19b-3p	BEND3		hsa-miR-20a-5p	OXR1		hsa-miR-21-5p	LRRFIP1
GTF2H1																												hsa-miR-16-5p	SYNRG		hsa-miR-19b-3p	ARID4B		hsa-miR-20a-5p	DHODH		hsa-miR-21-5p	CCR1
TSC22D1																												hsa-miR-16-5p	TPT1		hsa-miR-19b-3p	SPTY2D1		hsa-miR-20a-5p	KLF6		hsa-miR-21-5p	MUC1
GRHL1																												hsa-miR-16-5p	NOTCH2		hsa-miR-19b-3p	DYNC1LI2		hsa-miR-20a-5p	FEM1C		hsa-miR-21-5p	PTEN
CTC1																												hsa-miR-16-5p	MAP3K7		hsa-miR-19b-3p	EFR3A		hsa-miR-20a-5p	ALDH9A1		hsa-miR-21-5p	ISCU
UBB																												hsa-miR-16-5p	DUSP14		hsa-miR-19b-3p	PTEN		hsa-miR-20a-5p	SF3B3		hsa-miR-21-5p	CPEB3
KATNBL1																												hsa-miR-16-5p	SALL1		hsa-miR-19b-3p	EXOC7		hsa-miR-20a-5p	MAN1C1		hsa-miR-21-5p	PTEN
DEAF1																												hsa-miR-16-5p	EPT1		hsa-miR-19b-3p	ALKBH6		hsa-miR-20a-5p	SKIL		hsa-miR-21-5p	COX20
NFIA																												hsa-miR-16-5p	LIMA1		hsa-miR-19b-3p	TRIM59		hsa-miR-20a-5p	FOXK1		hsa-miR-21-5p	TMEM245
LIN28B																												hsa-miR-16-5p	AMER1		hsa-miR-19b-3p	CYP2U1		hsa-miR-20a-5p	FBXL5		hsa-miR-21-5p	RHOB
RPS27																												hsa-miR-16-5p	ORC4		hsa-miR-19b-3p	ZNF417		hsa-miR-20a-5p	MAPK9		hsa-miR-21-5p	VPS26A
FOXN2																												hsa-miR-16-5p	MRFAP1		hsa-miR-19b-3p	CHEK2		hsa-miR-20a-5p	ALDH18A1		hsa-miR-21-5p	SATB1
SREK1IP1																												hsa-miR-16-5p	EXD2		hsa-miR-19b-3p	KIAA0907		hsa-miR-20a-5p	PIP4K2A		hsa-miR-21-5p	TOP2A
YBX3																												hsa-miR-16-5p	SPTLC1		hsa-miR-19b-3p	FAM73B		hsa-miR-20a-5p	PDRG1		hsa-miR-21-5p	SGK3
ANAPC11																												hsa-miR-16-5p	PRR12		hsa-miR-19b-3p	DCC		hsa-miR-20a-5p	BMP8B		hsa-miR-21-5p	PLEKHA2
ZNF511																												hsa-miR-16-5p	KATNAL1		hsa-miR-19b-3p	TMEM9B		hsa-miR-20a-5p	ZNF93		hsa-miR-21-5p	MYO9A
FARSB																												hsa-miR-16-5p	FAM122B		hsa-miR-19b-3p	MID1IP1		hsa-miR-20a-5p	USP32		hsa-miR-21-5p	RNF11
H3F3A																												hsa-miR-16-5p	PPP2R1A		hsa-miR-19b-3p	EIF4A2		hsa-miR-20a-5p	BMP2		hsa-miR-21-5p	PTEN
PPP1CB																												hsa-miR-16-5p	MTHFR		hsa-miR-19b-3p	EPC1		hsa-miR-20a-5p	PLRG1		hsa-miR-21-5p	ASRGL1
RPL10A																												hsa-miR-16-5p	SLC25A12		hsa-miR-19b-3p	CBY1		hsa-miR-20a-5p	HSPA8		hsa-miR-21-5p	BCL7A
KBTBD8																												hsa-miR-16-5p	AIMP1		hsa-miR-19b-3p	FAM218A		hsa-miR-20a-5p	MAP2K3		hsa-miR-21-5p	TGFBR2
ATAT1																												hsa-miR-16-5p	ADRA2B		hsa-miR-19b-3p	CLIP1		hsa-miR-20a-5p	PLXNA1		hsa-miR-21-5p	AGO2
MED12																												hsa-miR-16-5p	SREK1		hsa-miR-19b-3p	OTUD7B		hsa-miR-20a-5p	PTGFRN		hsa-miR-21-5p	SLC16A10
RPL36A																												hsa-miR-16-5p	AVL9		hsa-miR-19b-3p	ESYT1		hsa-miR-20a-5p	CCND1		hsa-miR-21-5p	AFTPH
CDC73																												hsa-miR-16-5p	FGF2		hsa-miR-19b-3p	MOSPD2		hsa-miR-20a-5p	E2F2		hsa-miR-21-5p	EIF2S1
UNC50																												hsa-miR-16-5p	CCND1		hsa-miR-19b-3p	ACBD5		hsa-miR-20a-5p	CCDC125		hsa-miR-21-5p	PELI1
YWHAE																												hsa-miR-16-5p	CCNE1		hsa-miR-19b-3p	MRPL32		hsa-miR-20a-5p	TMEM97		hsa-miR-21-5p	CCL1
SMCHD1																												hsa-miR-16-5p	WBSCR16		hsa-miR-19b-3p	MAPK14		hsa-miR-20a-5p	NCAPD2		hsa-miR-21-5p	RALGPS2
PSMG2																												hsa-miR-16-5p	ACTB		hsa-miR-19b-3p	USP37		hsa-miR-20a-5p	MYLK3		hsa-miR-21-5p	TP53BP2
NDUFA2																												hsa-miR-16-5p	VTI1B		hsa-miR-19b-3p	HNRNPUL1		hsa-miR-20a-5p	ENTPD4		hsa-miR-21-5p	GP5
ATP6AP1L																												hsa-miR-16-5p	MARS		hsa-miR-19b-3p	CNOT4		hsa-miR-20a-5p	FAM129A		hsa-miR-21-5p	TGFB2
FBXL15																												hsa-miR-16-5p	PRKAR2A		hsa-miR-19b-3p	GATAD2B		hsa-miR-20a-5p	SEMA7A		hsa-miR-21-5p	PDCD4
MTO1																												hsa-miR-16-5p	SOX5		hsa-miR-19b-3p	CEP350		hsa-miR-20a-5p	SMAD5		hsa-miR-21-5p	PATE2
RPL26																												hsa-miR-16-5p	AMOTL1		hsa-miR-19b-3p	RHOB		hsa-miR-20a-5p	CEP97		hsa-miR-21-5p	TNS3
SERBP1																												hsa-miR-16-5p	NT5C3A		hsa-miR-19b-3p	MEF2A		hsa-miR-20a-5p	GPR137B		hsa-miR-21-5p	ERBB2
ATP5L																												hsa-miR-16-5p	UBE2Z		hsa-miR-19b-3p	CCNL1		hsa-miR-20a-5p	CLEC12B		hsa-miR-21-5p	DAAM1
PIKFYVE																												hsa-miR-16-5p	ZNF704		hsa-miR-19b-3p	CAPRIN2		hsa-miR-20a-5p	TGOLN2		hsa-miR-21-5p	SOCS4
2010-09-01																												hsa-miR-16-5p	TRMT10C		hsa-miR-19b-3p	PAFAH1B2		hsa-miR-20a-5p	FAM46C		hsa-miR-21-5p	SPG11
SHMT1																												hsa-miR-16-5p	RAN		hsa-miR-19b-3p	MMGT1		hsa-miR-20a-5p	TMEM127		hsa-miR-21-5p	RPRD2
TOR2A																												hsa-miR-16-5p	APP		hsa-miR-19b-3p	STOX2		hsa-miR-20a-5p	TSG101		hsa-miR-21-5p	CDC25A
ERBB3																												hsa-miR-16-5p	RFK		hsa-miR-19b-3p	SHCBP1		hsa-miR-20a-5p	LAPTM4A		hsa-miR-21-5p	PIK3R1
MEGF9																												hsa-miR-16-5p	PPP2R5C		hsa-miR-19b-3p	KIF13A		hsa-miR-20a-5p	TRIM32		hsa-miR-21-5p	PTEN
THUMPD1																												hsa-miR-16-5p	DIXDC1		hsa-miR-19b-3p	MYCN		hsa-miR-20a-5p	TMEM38A		hsa-miR-21-5p	RNF103
CENPP																												hsa-miR-16-5p	TIMM13		hsa-miR-19b-3p	ATXN1		hsa-miR-20a-5p	GPRIN3		hsa-miR-21-5p	GTF2I
ZNF395																												hsa-miR-16-5p	RPRD2		hsa-miR-19b-3p	USP13		hsa-miR-20a-5p	STIL		hsa-miR-21-5p	LPGAT1
ERBB2																												hsa-miR-16-5p	ZNF449		hsa-miR-19b-3p	LPHN2		hsa-miR-20a-5p	FEZ2		hsa-miR-21-5p	HOXA9
SORT1																												hsa-miR-16-5p	EIF5		hsa-miR-19b-3p	ZBTB4		hsa-miR-20a-5p	SLC25A46		hsa-miR-21-5p	NUBPL
BTG2																												hsa-miR-16-5p	CPEB3		hsa-miR-19b-3p	MCC		hsa-miR-20a-5p	ZNF35		hsa-miR-21-5p	DCP1A
ULK3																												hsa-miR-16-5p	HNRNPA1		hsa-miR-19b-3p	FYCO1		hsa-miR-20a-5p	PHTF2		hsa-miR-21-5p	PPFIA4
PARP1																												hsa-miR-16-5p	FAM89A		hsa-miR-19b-3p	SEC61A1		hsa-miR-20a-5p	CIT		hsa-miR-21-5p	MYC
FBN1																												hsa-miR-16-5p	MTMR3		hsa-miR-19b-3p	ATG14		hsa-miR-20a-5p	THEM4		hsa-miR-21-5p	PDCD4
PPP1CA																												hsa-miR-16-5p	CDC14B		hsa-miR-19b-3p	SLC44A1		hsa-miR-20a-5p	PSD3		hsa-miR-21-5p	TRPM7
CHMP3																												hsa-miR-16-5p	MEPCE		hsa-miR-19b-3p	SLC25A12		hsa-miR-20a-5p	KIAA1191		hsa-miR-21-5p	IRAK1
IPPK																												hsa-miR-16-5p	ABL2		hsa-miR-19b-3p	MED12L		hsa-miR-20a-5p	ZBTB37		hsa-miR-21-5p	PTEN
TMEM101																												hsa-miR-16-5p	WNT3A		hsa-miR-19b-3p	YY1		hsa-miR-20a-5p	MAP3K14		hsa-miR-21-5p	RRAGC
FAT1																												hsa-miR-16-5p	DNAJA4		hsa-miR-19b-3p	BTF3L4		hsa-miR-20a-5p	ASB16		hsa-miR-21-5p	PDCD4
VDAC1																												hsa-miR-16-5p	SLC25A38		hsa-miR-19b-3p	KLF13		hsa-miR-20a-5p	SLC4A7		hsa-miR-21-5p	SLC17A5
NBPF11																												hsa-miR-16-5p	GNB1		hsa-miR-19b-3p	MAVS		hsa-miR-20a-5p	RAB5B		hsa-miR-21-5p	TRIM59
TNKS1BP1																												hsa-miR-16-5p	COPS7B		hsa-miR-19b-3p	HIF1AN		hsa-miR-20a-5p	DYNC1LI2		hsa-miR-21-5p	TUBGCP5
KHSRP																												hsa-miR-16-5p	APP		hsa-miR-19b-3p	MB21D1		hsa-miR-20a-5p	MDM2		hsa-miR-21-5p	PTEN
SIRT7																												hsa-miR-16-5p	MRPS31		hsa-miR-19b-3p	PDRG1		hsa-miR-20a-5p	TRAPPC10		hsa-miR-21-5p	RASGRP1
CDH5																												hsa-miR-16-5p	CECR5		hsa-miR-19b-3p	ANKRD50		hsa-miR-20a-5p	CLIC4		hsa-miR-21-5p	RMND5A
GOLGA8A																												hsa-miR-16-5p	GNAT1		hsa-miR-19b-3p	NRBF2		hsa-miR-20a-5p	FAM160B1		hsa-miR-21-5p	MBNL1
MCL1																												hsa-miR-16-5p	PPM1D		hsa-miR-19b-3p	RNF216		hsa-miR-20a-5p	ATP1B3		hsa-miR-21-5p	ZYG11B
SLC25A1																												hsa-miR-16-5p	FAM103A1		hsa-miR-19b-3p	PRKACB		hsa-miR-20a-5p	CCDC47
CRTC1																												hsa-miR-16-5p	MTHFD1L		hsa-miR-19b-3p	TRIM37		hsa-miR-20a-5p	NFIB
HDGF																												hsa-miR-16-5p	UFC1		hsa-miR-19b-3p	PPTC7		hsa-miR-20a-5p	C5orf28
PANK1																												hsa-miR-16-5p	KPNA3		hsa-miR-19b-3p	RNF44		hsa-miR-20a-5p	EMR2
MYEF2																												hsa-miR-16-5p	CABIN1		hsa-miR-19b-3p	KCTD10		hsa-miR-20a-5p	KLHL36
PABPC1																												hsa-miR-16-5p	SBNO1		hsa-miR-19b-3p	LBR		hsa-miR-20a-5p	EMC1
RPS28																												hsa-miR-16-5p	IFT74		hsa-miR-19b-3p	PTEN		hsa-miR-20a-5p	B2M
EPO																												hsa-miR-16-5p	GRPEL2		hsa-miR-19b-3p	ATP6V1B2		hsa-miR-20a-5p	RAB10
NNT																												hsa-miR-16-5p	NUFIP2		hsa-miR-19b-3p	YY1		hsa-miR-20a-5p	DNAJB6
BCL2L2																												hsa-miR-16-5p	ZNF585B		hsa-miR-19b-3p	EPS15		hsa-miR-20a-5p	ITCH
CEBPA																												hsa-miR-16-5p	NFIC		hsa-miR-19b-3p	TMTC1		hsa-miR-20a-5p	TRAF3IP2
EIF1AD																												hsa-miR-16-5p	MSH2		hsa-miR-19b-3p	NFATC2IP		hsa-miR-20a-5p	SAMD9L
NUP37																												hsa-miR-16-5p	PUM1		hsa-miR-19b-3p	KAT2A		hsa-miR-20a-5p	RMND1
EHMT1																												hsa-miR-16-5p	IVNS1ABP		hsa-miR-19b-3p	ABHD5		hsa-miR-20a-5p	SEMA4B
SMC6																												hsa-miR-16-5p	ANKRD13B		hsa-miR-19b-3p	MED12L		hsa-miR-20a-5p	ZC3H12C
SIX1																												hsa-miR-16-5p	KANK1		hsa-miR-19b-3p	MBNL1		hsa-miR-20a-5p	MYLIP
HMGCLL1																												hsa-miR-16-5p	HSPE1-MOB4		hsa-miR-19b-3p	GMFB		hsa-miR-20a-5p	FOXK1
ESRP2																												hsa-miR-16-5p	UTP23		hsa-miR-19b-3p	ZNF567		hsa-miR-20a-5p	AGMAT
GABRB3																												hsa-miR-16-5p	SLC19A1		hsa-miR-19b-3p	DLG5		hsa-miR-20a-5p	SLC25A44
NEGR1																												hsa-miR-16-5p	ORC4		hsa-miR-19b-3p	FKBP15		hsa-miR-20a-5p	PPP1R15B
PSAT1																												hsa-miR-16-5p	ARPC5L		hsa-miR-19b-3p	ZNF217		hsa-miR-20a-5p	SRSF2
IL6R																												hsa-miR-16-5p	DOCK11		hsa-miR-19b-3p	ABHD5		hsa-miR-20a-5p	TSPAN6
CBFB																												hsa-miR-16-5p	ZCCHC3		hsa-miR-19b-3p	ERCC4		hsa-miR-20a-5p	IRF2
ZNF212																												hsa-miR-16-5p	SSU72		hsa-miR-19b-3p	WDR26		hsa-miR-20a-5p	TUBB
TP53																												hsa-miR-16-5p	EIF3C		hsa-miR-19b-3p	GDNF		hsa-miR-20a-5p	MED16
XIAP																												hsa-miR-16-5p	BTBD2		hsa-miR-19b-3p	BRWD3		hsa-miR-20a-5p	LDLR
GOLGA8B																												hsa-miR-16-5p	PSMC2		hsa-miR-19b-3p	REEP3		hsa-miR-20a-5p	PDHB
ZFYVE1																												hsa-miR-16-5p	EFNB2		hsa-miR-19b-3p	CIT		hsa-miR-20a-5p	AKAP11
E2F7																												hsa-miR-16-5p	GFPT1		hsa-miR-19b-3p	ZNF772		hsa-miR-20a-5p	RPF2
CGN																												hsa-miR-16-5p	GPR55		hsa-miR-19b-3p	HOXA5		hsa-miR-20a-5p	PURB
GRIN2A																												hsa-miR-16-5p	C2orf42		hsa-miR-19b-3p	SF3B3		hsa-miR-20a-5p	ATAT1
STC2																												hsa-miR-16-5p	ATP6V1B2		hsa-miR-19b-3p	FOXQ1		hsa-miR-20a-5p	RAB42
EPOR																												hsa-miR-16-5p	CHMP3		hsa-miR-19b-3p	WDR26		hsa-miR-20a-5p	MUC17
STARD8																												hsa-miR-16-5p	ASH1L		hsa-miR-19b-3p	ANKRD10		hsa-miR-20a-5p	RAB12
DUSP6																												hsa-miR-16-5p	UGT2B4		hsa-miR-19b-3p	ERCC4		hsa-miR-20a-5p	PTEN
ADRM1																												hsa-miR-16-5p	ZNF559		hsa-miR-19b-3p	ELOVL5		hsa-miR-20a-5p	ARID4B
PCTP																												hsa-miR-16-5p	STRAP		hsa-miR-19b-3p	C6orf132		hsa-miR-20a-5p	ARHGEF7
SUGP2																												hsa-miR-16-5p	IPPK		hsa-miR-19b-3p	DCAF7		hsa-miR-20a-5p	ZDHHC20
PTOV1																												hsa-miR-16-5p	TERF2IP		hsa-miR-19b-3p	CC2D1A		hsa-miR-20a-5p	DNTTIP2
TP53INP1																												hsa-miR-16-5p	CCNE1		hsa-miR-19b-3p	TNRC6A		hsa-miR-20a-5p	ITGB1
STOX2																												hsa-miR-16-5p	KIAA0368		hsa-miR-19b-3p	RASSF2		hsa-miR-20a-5p	DYRK2
C2orf15																												hsa-miR-16-5p	SLC4A2		hsa-miR-19b-3p	ZBTB7B		hsa-miR-20a-5p	FBXL5
CDRT4																												hsa-miR-16-5p	TTF2		hsa-miR-19b-3p	MAPK1		hsa-miR-20a-5p	AKTIP
ZNF177																												hsa-miR-16-5p	E2F7		hsa-miR-19b-3p	C15orf38		hsa-miR-20a-5p	AGO4
IRF4																												hsa-miR-16-5p	SERBP1		hsa-miR-19b-3p	SOX4		hsa-miR-20a-5p	HNRNPR
BTBD3																												hsa-miR-16-5p	CNN3		hsa-miR-19b-3p	TRIM33		hsa-miR-20a-5p	FAM83D
PPM1H																												hsa-miR-16-5p	GPRC5A		hsa-miR-19b-3p	HNRNPUL1		hsa-miR-20a-5p	ZBTB25
SLC19A1																												hsa-miR-16-5p	BCL2		hsa-miR-19b-3p	SECISBP2L		hsa-miR-20a-5p	RB1
CNGB1																												hsa-miR-16-5p	VEGFA		hsa-miR-19b-3p	ZNF138		hsa-miR-20a-5p	UEVLD
HBS1L																												hsa-miR-16-5p	SYPL1		hsa-miR-19b-3p	SEC61A1		hsa-miR-20a-5p	PHTF2
CTDSP1																												hsa-miR-16-5p	MLXIP		hsa-miR-19b-3p	WDR45B		hsa-miR-20a-5p	DHODH
UBR7																												hsa-miR-16-5p	E2F7		hsa-miR-19b-3p	SNX5		hsa-miR-20a-5p	ATG16L1
S100A8																												hsa-miR-16-5p	ADSS		hsa-miR-19b-3p	OTUD1		hsa-miR-20a-5p	ZNF12
MFSD9																												hsa-miR-16-5p	LYPD2		hsa-miR-19b-3p	E2F8		hsa-miR-20a-5p	ICMT
SH3BP5L																												hsa-miR-16-5p	RRP36		hsa-miR-19b-3p	SEMA4C		hsa-miR-20a-5p	FEM1A
PLEKHA8																												hsa-miR-16-5p	TMEM135		hsa-miR-19b-3p	ARMC8		hsa-miR-20a-5p	USP28
EHD1																												hsa-miR-16-5p	CNNM2		hsa-miR-19b-3p	ATMIN		hsa-miR-20a-5p	GPR137B
LSM14B																												hsa-miR-16-5p	LUZP1		hsa-miR-19b-3p	BAHD1		hsa-miR-20a-5p	PTPDC1
DDX50																												hsa-miR-16-5p	CDS2		hsa-miR-19b-3p	SH3KBP1		hsa-miR-20a-5p	LIMK1
ZNF592																												hsa-miR-16-5p	YIF1B		hsa-miR-19b-3p	CCNA2		hsa-miR-20a-5p	ANKRD33B
GJB7																												hsa-miR-16-5p	AKAP13		hsa-miR-19b-3p	SOX4		hsa-miR-20a-5p	COX19
HRH4																												hsa-miR-16-5p	USP42		hsa-miR-19b-3p	PPP2R5E		hsa-miR-20a-5p	MYPN
LIPA																												hsa-miR-16-5p	PNRC2		hsa-miR-19b-3p	MLEC		hsa-miR-20a-5p	ADSS
GALNT18																												hsa-miR-16-5p	CADM1		hsa-miR-19b-3p	SMG1		hsa-miR-20a-5p	DYNC1LI2
RMND5A																												hsa-miR-16-5p	SNRPA1		hsa-miR-19b-3p	HEG1		hsa-miR-20a-5p	IPP
TMEM2																												hsa-miR-16-5p	TMEM55B		hsa-miR-19b-3p	PSMD9		hsa-miR-20a-5p	RPA2
RPLP0																												hsa-miR-16-5p	LUC7L3		hsa-miR-19b-3p	GMFB		hsa-miR-20a-5p	TXNIP
C15orf39																												hsa-miR-16-5p	ACTR2		hsa-miR-19b-3p	CCNL1		hsa-miR-20a-5p	NAA50
ZNF385A																												hsa-miR-16-5p	GLTSCR2		hsa-miR-19b-3p	SOCS1		hsa-miR-20a-5p	QRFPR
FAM174B																												hsa-miR-16-5p	UBE2V1		hsa-miR-19b-3p	NACC1		hsa-miR-20a-5p	HOXD11
THAP3																												hsa-miR-16-5p	DAP3		hsa-miR-19b-3p	GIGYF1		hsa-miR-20a-5p	SLC35F6
BAK1																												hsa-miR-16-5p	BCL7A		hsa-miR-19b-3p	PFN2		hsa-miR-20a-5p	C9orf40
RAF1																												hsa-miR-16-5p	YIF1B		hsa-miR-19b-3p	PDRG1		hsa-miR-20a-5p	ACTR2
C19orf54																												hsa-miR-16-5p	EFNB2		hsa-miR-19b-3p	BMPR2		hsa-miR-20a-5p	TCF4
RRP7A																												hsa-miR-16-5p	FOXK1		hsa-miR-19b-3p	TNFRSF12A		hsa-miR-20a-5p	CRY2
CCNE1																												hsa-miR-16-5p	TAF15		hsa-miR-19b-3p	IER3IP1		hsa-miR-20a-5p	RAN
C1orf109																												hsa-miR-16-5p	PLEKHM2		hsa-miR-19b-3p	BCL2L11		hsa-miR-20a-5p	FEM1C
GSS																												hsa-miR-16-5p	SSU72		hsa-miR-19b-3p	EPN2		hsa-miR-20a-5p	GATAD1
GANAB																												hsa-miR-16-5p	PRDM4		hsa-miR-19b-3p	GRK4		hsa-miR-20a-5p	RRM2
FGFR2																												hsa-miR-16-5p	ANKRD36		hsa-miR-19b-3p	SLC35D1		hsa-miR-20a-5p	CDK19
TMEM136																												hsa-miR-16-5p	GNAL		hsa-miR-19b-3p	FNDC3A		hsa-miR-20a-5p	DIS3L
SPEN																												hsa-miR-16-5p	ZNF384		hsa-miR-19b-3p	PIK3R3		hsa-miR-20a-5p	NAGK
COX7C																												hsa-miR-16-5p	ACTN1		hsa-miR-19b-3p	NFIB		hsa-miR-20a-5p	CHURC1
C1D																												hsa-miR-16-5p	VCL		hsa-miR-19b-3p	NIPA1		hsa-miR-20a-5p	AP3D1
SMC2																												hsa-miR-16-5p	CUL4A		hsa-miR-19b-3p	MRPL19		hsa-miR-20a-5p	CCP110
MTRF1L																												hsa-miR-16-5p	SMURF1		hsa-miR-19b-3p	ZNF721		hsa-miR-20a-5p	GATA6
CHPF2																												hsa-miR-16-5p	NHLRC3		hsa-miR-19b-3p	PPP1R15B		hsa-miR-20a-5p	YWHAZ
VPS4B																												hsa-miR-16-5p	SLC7A1		hsa-miR-19b-3p	WBP4		hsa-miR-20a-5p	KMT2B
PTGES																												hsa-miR-16-5p	SERINC5		hsa-miR-19b-3p	SESN3		hsa-miR-20a-5p	M6PR
PRKRA																												hsa-miR-16-5p	PNISR		hsa-miR-19b-3p	ZNF134		hsa-miR-20a-5p	CCL5
B4GALT3																												hsa-miR-16-5p	CDC25A		hsa-miR-19b-3p	MOB1B		hsa-miR-20a-5p	SLC35F5
WDR11																												hsa-miR-16-5p	ATG14		hsa-miR-19b-3p	PSAP		hsa-miR-20a-5p	CFL2
BCL3																												hsa-miR-16-5p	EIF4B		hsa-miR-19b-3p	NDFIP1		hsa-miR-20a-5p	TMEM242
RIMS4																												hsa-miR-16-5p	SAV1		hsa-miR-19b-3p	HADHB		hsa-miR-20a-5p	MAP3K5
RPS12																												hsa-miR-16-5p	NCOR2		hsa-miR-19b-3p	C16orf70		hsa-miR-20a-5p	ARHGAP12
MTMR3																												hsa-miR-16-5p	CLNS1A		hsa-miR-19b-3p	NUP54		hsa-miR-20a-5p	RRAS2
KPNB1																												hsa-miR-16-5p	RECK		hsa-miR-19b-3p	YY1		hsa-miR-20a-5p	ARPC2
NUP93																												hsa-miR-16-5p	SMAD7		hsa-miR-19b-3p	RAB1A		hsa-miR-20a-5p	ACTR2
PCDHGB2																												hsa-miR-16-5p	DNAJB4		hsa-miR-19b-3p	ZMAT3		hsa-miR-20a-5p	MAN2B2
CDKN2A																												hsa-miR-16-5p	C11orf24		hsa-miR-19b-3p	RAB34		hsa-miR-20a-5p	FBXO3
IKZF2																												hsa-miR-16-5p	CCNE1		hsa-miR-19b-3p	DEGS1		hsa-miR-20a-5p	LASP1
FBXO38																												hsa-miR-16-5p	BAG6		hsa-miR-19b-3p	RBM20		hsa-miR-20a-5p	MIDN
NSUN2																												hsa-miR-16-5p	TRAF4		hsa-miR-19b-3p	PSAP		hsa-miR-20a-5p	DIAPH2
BACE2																												hsa-miR-16-5p	TOMM34		hsa-miR-19b-3p	LMLN		hsa-miR-20a-5p	TMOD3
ZSWIM6																												hsa-miR-16-5p	MERTK		hsa-miR-19b-3p	TMEM2		hsa-miR-20a-5p	MASTL
EXTL3																												hsa-miR-16-5p	PHKA1		hsa-miR-19b-3p	SLC27A1		hsa-miR-20a-5p	SLC5A3
SPHAR																												hsa-miR-16-5p	GSK3B		hsa-miR-19b-3p	SGK1		hsa-miR-20a-5p	PRIM1
EXOC7																												hsa-miR-16-5p	SLC29A1		hsa-miR-19b-3p	ARHGAP11A		hsa-miR-20a-5p	CYLD
PIP4K2C																												hsa-miR-16-5p	SMAD1		hsa-miR-19b-3p	MFF		hsa-miR-20a-5p	TTC9
VPS51																												hsa-miR-16-5p	MARCH6		hsa-miR-19b-3p	SPTSSA		hsa-miR-20a-5p	POLR1B
CD320																												hsa-miR-16-5p	SLCO3A1		hsa-miR-19b-3p	PTPRG		hsa-miR-20a-5p	AKAP11
LONRF2																												hsa-miR-16-5p	SPCS3		hsa-miR-19b-3p	HIPK3		hsa-miR-20a-5p	NFAT5
EIF4EBP1																												hsa-miR-16-5p	RPS5		hsa-miR-19b-3p	GINS1		hsa-miR-20a-5p	COIL
MTMR12																												hsa-miR-16-5p	SPRED1		hsa-miR-19b-3p	PATL1		hsa-miR-20a-5p	HECA
PDZD11																												hsa-miR-16-5p	PPIF		hsa-miR-19b-3p	MAVS		hsa-miR-20a-5p	HIST1H2BD
E2F3																												hsa-miR-16-5p	EEF2K		hsa-miR-19b-3p	PTBP2		hsa-miR-20a-5p	SCAMP2
KIAA0141																												hsa-miR-16-5p	NUP50		hsa-miR-19b-3p	E2F8		hsa-miR-20a-5p	SIK1
LACTB																												hsa-miR-16-5p	DNAJA1		hsa-miR-19b-3p	TMOD3		hsa-miR-20a-5p	KIT
PTGS1																												hsa-miR-16-5p	YIPF6		hsa-miR-19b-3p	MLLT10		hsa-miR-20a-5p	TDRD3
SPATA5																												hsa-miR-16-5p	RABGGTB		hsa-miR-19b-3p	FAM83D		hsa-miR-20a-5p	TXNIP
PIK3CD																												hsa-miR-16-5p	SLC25A39		hsa-miR-19b-3p	HIPK3		hsa-miR-20a-5p	MIDN
BCKDK																												hsa-miR-16-5p	IFNG		hsa-miR-19b-3p	ZBTB47		hsa-miR-20a-5p	GIGYF1
LSM4																												hsa-miR-16-5p	CENPJ		hsa-miR-19b-3p	SLC6A8		hsa-miR-20a-5p	TGFBR2
NUP205																												hsa-miR-16-5p	DCUN1D5		hsa-miR-19b-3p	HOMER1		hsa-miR-20a-5p	LDLR
SUPT6H																												hsa-miR-16-5p	N4BP1		hsa-miR-19b-3p	TAF4		hsa-miR-20a-5p	ARHGAP1
AGPAT6																												hsa-miR-16-5p	CCND2		hsa-miR-19b-3p	SERINC3		hsa-miR-20a-5p	KLHL15
TNFAIP3																												hsa-miR-16-5p	MDN1		hsa-miR-19b-3p	GFPT1		hsa-miR-20a-5p	PDRG1
FAM91A1																												hsa-miR-16-5p	SMEK2		hsa-miR-19b-3p	ARAP2		hsa-miR-20a-5p	KPNA2
RASGRP1																												hsa-miR-16-5p	SLC35A4		hsa-miR-19b-3p	HPRT1		hsa-miR-20a-5p	FAM129A
THRAP3																												hsa-miR-16-5p	EXT1		hsa-miR-19b-3p	C12orf66		hsa-miR-20a-5p	BACH1
RASAL2																												hsa-miR-16-5p	MAFK		hsa-miR-19b-3p	WDR45B		hsa-miR-20a-5p	POFUT1
SLC16A4																												hsa-miR-16-5p	HNRNPDL		hsa-miR-19b-3p	EOGT		hsa-miR-20a-5p	HMGB2
SGPL1																												hsa-miR-16-5p	HIGD1A		hsa-miR-19b-3p	USP8		hsa-miR-20a-5p	PTEN
MTF1																												hsa-miR-16-5p	SLC35E2B		hsa-miR-19b-3p	SGTB		hsa-miR-20a-5p	U2SURP
FXR1																												hsa-miR-16-5p	CDC123		hsa-miR-19b-3p	ZMAT3		hsa-miR-20a-5p	ZNF665
ACLY																												hsa-miR-16-5p	TDRD3		hsa-miR-19b-3p	SKIL		hsa-miR-20a-5p	RBL1
NES																												hsa-miR-16-5p	RBBP6		hsa-miR-19b-3p	EIF4A2		hsa-miR-20a-5p	FGF7
KLF13																												hsa-miR-16-5p	ITGB4		hsa-miR-19b-3p	ATXN1		hsa-miR-20a-5p	DNM1L
NME2																												hsa-miR-16-5p	RAB11FIP2		hsa-miR-19b-3p	POLI		hsa-miR-20a-5p	ZBTB5
GRINA																												hsa-miR-16-5p	CPSF7		hsa-miR-19b-3p	GNPTAB		hsa-miR-20a-5p	PIGO
TNRC6B																												hsa-miR-16-5p	KCNN4		hsa-miR-19b-3p	DCAF8		hsa-miR-20a-5p	GATAD1
SMARCD2																												hsa-miR-16-5p	MOB3C		hsa-miR-19b-3p	RASA1		hsa-miR-20a-5p	ZFYVE21
CEBPG																												hsa-miR-16-5p	CLIP4		hsa-miR-19b-3p	GAK		hsa-miR-20a-5p	SRSF2
PFKM																												hsa-miR-16-5p	BTG2		hsa-miR-19b-3p	PTBP2		hsa-miR-20a-5p	TPK1
C17orf80																												hsa-miR-16-5p	CNOT7		hsa-miR-19b-3p	OTUD4		hsa-miR-20a-5p	USP16
MMAB																												hsa-miR-16-5p	SLC25A12		hsa-miR-19b-3p	MLEC		hsa-miR-20a-5p	MINK1
ETS1																												hsa-miR-16-5p	SON		hsa-miR-19b-3p	MAPK1		hsa-miR-20a-5p	BBX
ARF3																												hsa-miR-16-5p	CPEB2		hsa-miR-19b-3p	RGL1		hsa-miR-20a-5p	QKI
LIF																												hsa-miR-16-5p	GPATCH8		hsa-miR-19b-3p	TRPC3		hsa-miR-20a-5p	BNIP2
SCARB2																												hsa-miR-16-5p	BCL2		hsa-miR-19b-3p	MTMR6		hsa-miR-20a-5p	ZC3H12C
BBC3																												hsa-miR-16-5p	OMA1		hsa-miR-19b-3p	ACSL4		hsa-miR-20a-5p	SLC28A1
NTRK3																												hsa-miR-16-5p	TUBA1C		hsa-miR-19b-3p	ZNF800		hsa-miR-20a-5p	COX6B1
IKZF4																												hsa-miR-16-5p	CDC25A		hsa-miR-19b-3p	MRPL17		hsa-miR-20a-5p	STK11IP
EMD																												hsa-miR-16-5p	PI4K2B		hsa-miR-19b-3p	ABHD5		hsa-miR-20a-5p	MANEAL
ABTB1																												hsa-miR-16-5p	AXIN2		hsa-miR-19b-3p	TGFBR2		hsa-miR-20a-5p	RAPGEF4
IFRD2																												hsa-miR-16-5p	MOB4		hsa-miR-19b-3p	THBS1		hsa-miR-20a-5p	CEP72
KIF24																												hsa-miR-16-5p	PYGB		hsa-miR-19b-3p	WEE1		hsa-miR-20a-5p	DSPP
TBC1D1																												hsa-miR-16-5p	NUDT3		hsa-miR-19b-3p	PRKAA1		hsa-miR-20a-5p	FCHO2
PKM																												hsa-miR-16-5p	CA8		hsa-miR-19b-3p	RAB14		hsa-miR-20a-5p	DUSP18
STARD13																												hsa-miR-16-5p	EIF3F		hsa-miR-19b-3p	ESRRB		hsa-miR-20a-5p	PHYH
UNG																												hsa-miR-16-5p	CYLD		hsa-miR-19b-3p	PPP6R2		hsa-miR-20a-5p	FRMD6
HOXA13																												hsa-miR-16-5p	HNRNPDL		hsa-miR-19b-3p	WDR20		hsa-miR-20a-5p	RPS27A
MKNK2																												hsa-miR-16-5p	AP2M1		hsa-miR-19b-3p	EIF4A2		hsa-miR-20a-5p	MED17
TMEM9																												hsa-miR-16-5p	PLD3		hsa-miR-19b-3p	PIGS		hsa-miR-20a-5p	TLR7
RNASEH2A																												hsa-miR-16-5p	TTC17		hsa-miR-19b-3p	LDLR		hsa-miR-20a-5p	GNS
ASB16																												hsa-miR-16-5p	PAGR1		hsa-miR-19b-3p	RPA2		hsa-miR-20a-5p	N4BP1
NPM1																												hsa-miR-16-5p	GFM1		hsa-miR-19b-3p	CASZ1		hsa-miR-20a-5p	CEP104
SLC7A1																												hsa-miR-16-5p	MRC2		hsa-miR-19b-3p	ZNF134		hsa-miR-20a-5p	CCDC30
SMO																												hsa-miR-16-5p	KIAA0895		hsa-miR-19b-3p	CLIP1		hsa-miR-20a-5p	ATP6V0E1
EMC1																												hsa-miR-16-5p	CDC37L1		hsa-miR-19b-3p	CLIP1		hsa-miR-20a-5p	ANKRD52
HSPBP1																												hsa-miR-16-5p	RIF1		hsa-miR-19b-3p	NACC1		hsa-miR-20a-5p	BBX
PDS5A																												hsa-miR-16-5p	XPO7		hsa-miR-19b-3p	ZNF772		hsa-miR-20a-5p	TADA2B
ICAM2																												hsa-miR-16-5p	CDK1		hsa-miR-19b-3p	MBD3		hsa-miR-20a-5p	TMEM138
AKAP2																												hsa-miR-16-5p	AMOTL1		hsa-miR-19b-3p	DHX40		hsa-miR-20a-5p	GINS4
REST																												hsa-miR-16-5p	HSPA1A		hsa-miR-19b-3p	SATB1		hsa-miR-20a-5p	RAB11FIP1
PABPC4																												hsa-miR-16-5p	COMT		hsa-miR-19b-3p	G3BP2		hsa-miR-20a-5p	FBXL5
PRKAG1																												hsa-miR-16-5p	CPSF7		hsa-miR-19b-3p	NFATC2IP		hsa-miR-20a-5p	PXK
DGAT1																												hsa-miR-16-5p	NSF		hsa-miR-19b-3p	SEL1L3		hsa-miR-20a-5p	KDM4D
MAPK14																												hsa-miR-16-5p	SIK1		hsa-miR-19b-3p	ARL8A		hsa-miR-20a-5p	HSPA4L
BCL2L13																												hsa-miR-16-5p	ZNF622		hsa-miR-19b-3p	PLAU		hsa-miR-20a-5p	CFL2
GOLGA1																												hsa-miR-16-5p	AGK		hsa-miR-19b-3p	MYBL2		hsa-miR-20a-5p	RNF34
HSPD1																												hsa-miR-16-5p	SEC61A2		hsa-miR-19b-3p	CYP2U1		hsa-miR-20a-5p	TBC1D15
SMYD5																												hsa-miR-16-5p	HEATR2		hsa-miR-19b-3p	DICER1		hsa-miR-20a-5p	BTF3L4
SAMD10																												hsa-miR-16-5p	NACA		hsa-miR-19b-3p	CREBL2		hsa-miR-20a-5p	NRIP3
CD244																												hsa-miR-16-5p	CUL3		hsa-miR-19b-3p	MAPK1		hsa-miR-20a-5p	PCBP2
ACSS1																												hsa-miR-16-5p	CMPK1		hsa-miR-19b-3p	TP53		hsa-miR-20a-5p	KIAA0922
MTMR4																												hsa-miR-16-5p	DHX35		hsa-miR-19b-3p	YTHDC1		hsa-miR-20a-5p	LPGAT1
SMIM8																												hsa-miR-16-5p	PTPRD		hsa-miR-19b-3p	SF3B3		hsa-miR-20a-5p	MSH3
SCNN1A																												hsa-miR-16-5p	RS1		hsa-miR-19b-3p	ZIC5		hsa-miR-20a-5p	ADRBK2
STAT3																												hsa-miR-16-5p	CSDE1		hsa-miR-19b-3p	TRAK2		hsa-miR-20a-5p	ANKIB1
ETF1																												hsa-miR-16-5p	RECK		hsa-miR-19b-3p	TSC22D3		hsa-miR-20a-5p	CNOT4
HNRNPK																												hsa-miR-16-5p	KIF5A		hsa-miR-19b-3p	JARID2		hsa-miR-20a-5p	ZNF454
MAN1B1																												hsa-miR-16-5p	ACP2		hsa-miR-19b-3p	MSMO1		hsa-miR-20a-5p	B2M
CCDC124																												hsa-miR-16-5p	YIPF2		hsa-miR-19b-3p	ZNF526		hsa-miR-20a-5p	SLC16A9
RPL3																												hsa-miR-16-5p	GABPA		hsa-miR-19b-3p	LCLAT1		hsa-miR-20a-5p	RPRD2
SNRPB																												hsa-miR-16-5p	NARS		hsa-miR-19b-3p	VAMP3		hsa-miR-20a-5p	CERCAM
RGS19																												hsa-miR-16-5p	TKTL1		hsa-miR-19b-3p	GSKIP		hsa-miR-20a-5p	F3
TMEM59																												hsa-miR-16-5p	EPC1		hsa-miR-19b-3p	FBXO8		hsa-miR-20a-5p	EIF4G2
IRS4																												hsa-miR-16-5p	KPNA3		hsa-miR-19b-3p	ARID4B		hsa-miR-20a-5p	MSMO1
CMTM4																												hsa-miR-16-5p	WEE1		hsa-miR-19b-3p	MBD4		hsa-miR-20a-5p	RPF2
EIF5																												hsa-miR-16-5p	VTI1B		hsa-miR-19b-3p	TES		hsa-miR-20a-5p	PRR14L
QSOX2																												hsa-miR-16-5p	PHEX		hsa-miR-19b-3p	ZBTB47		hsa-miR-20a-5p	ABCG8
USP8																												hsa-miR-16-5p	LAMP2		hsa-miR-19b-3p	MMGT1		hsa-miR-20a-5p	MLXIP
PLXDC1																												hsa-miR-16-5p	COPS5		hsa-miR-19b-3p	TNKS		hsa-miR-20a-5p	FEM1B
ABCC1																												hsa-miR-16-5p	CDC27		hsa-miR-19b-3p	TAF4		hsa-miR-20a-5p	HMGB1
CEP170																												hsa-miR-16-5p	ENTPD6		hsa-miR-19b-3p	RHOB		hsa-miR-20a-5p	E2F1
ATXN1																												hsa-miR-16-5p	BCL2		hsa-miR-19b-3p	SOCS1		hsa-miR-20a-5p	SKIL
TIMM10																												hsa-miR-16-5p	ZNF691		hsa-miR-19b-3p	ATXN7L1		hsa-miR-20a-5p	IQSEC1
PLA2G4F																												hsa-miR-16-5p	NCAPG		hsa-miR-19b-3p	BLCAP		hsa-miR-20a-5p	BTG2
ZMYND11																												hsa-miR-16-5p	TNFSF9		hsa-miR-19b-3p	WNT7B		hsa-miR-20a-5p	HSPA8
HK2																												hsa-miR-16-5p	RPS12		hsa-miR-19b-3p	NCKAP5		hsa-miR-20a-5p	ZMYM1
SDHB																												hsa-miR-16-5p	UBE2V1		hsa-miR-19b-3p	RAN		hsa-miR-20a-5p	NABP1
RPS6KA1																												hsa-miR-16-5p	LAMB1		hsa-miR-19b-3p	INO80		hsa-miR-20a-5p	SACS
RPS7																												hsa-miR-16-5p	TACO1		hsa-miR-19b-3p	ZMYND11		hsa-miR-20a-5p	B2M
SMAD4																												hsa-miR-16-5p	IMPAD1		hsa-miR-19b-3p	AMMECR1L		hsa-miR-20a-5p	UNK
LBX2																												hsa-miR-16-5p	OXNAD1		hsa-miR-19b-3p	TMEM138		hsa-miR-20a-5p	BTN3A2
HSPA1B																												hsa-miR-16-5p	RACGAP1		hsa-miR-19b-3p	PDZD11		hsa-miR-20a-5p	RAN
TET2																												hsa-miR-16-5p	MAP3K7		hsa-miR-19b-3p	AMMECR1L		hsa-miR-20a-5p	PNRC1
NRD1																												hsa-miR-16-5p	C9orf114		hsa-miR-19b-3p	ELMOD2		hsa-miR-20a-5p	ATXN1
ARIH2																												hsa-miR-16-5p	FAM208A		hsa-miR-19b-3p	PALM2-AKAP2		hsa-miR-20a-5p	DLG5
EPHA7																												hsa-miR-16-5p	E2F3		hsa-miR-19b-3p	CAB39		hsa-miR-20a-5p	SGPL1
LINS																												hsa-miR-16-5p	TRUB2		hsa-miR-19b-3p	AKAP2		hsa-miR-20a-5p	FNBP1L
SLC7A6																												hsa-miR-16-5p	ACBD5		hsa-miR-19b-3p	ZNF367		hsa-miR-20a-5p	TXNIP
FUS																												hsa-miR-16-5p	SLC38A5		hsa-miR-19b-3p	ZNF154		hsa-miR-20a-5p	TXK
RAB4A																												hsa-miR-16-5p	AMPD1		hsa-miR-19b-3p	TNRC6A		hsa-miR-20a-5p	PTPN4
ANKRD33B																												hsa-miR-16-5p	ODF2L		hsa-miR-19b-3p	PFN1		hsa-miR-20a-5p	THBS1
NDC1																												hsa-miR-16-5p	N4BP1		hsa-miR-19b-3p	KLHL21		hsa-miR-20a-5p	MIDN
HID1																												hsa-miR-16-5p	KIF23		hsa-miR-19b-3p	ZCCHC14		hsa-miR-20a-5p	PLXNA1
SIK2																												hsa-miR-16-5p	HSPE1-MOB4		hsa-miR-19b-3p	COX10		hsa-miR-20a-5p	NABP1
SEL1L																												hsa-miR-16-5p	SRPK1		hsa-miR-19b-3p	ACBD5		hsa-miR-20a-5p	ZFYVE21
MON1B																												hsa-miR-16-5p	NEGR1		hsa-miR-19b-3p	TGFBR2		hsa-miR-20a-5p	CRK
BMF																												hsa-miR-16-5p	CARD10		hsa-miR-19b-3p	ZNF644		hsa-miR-20a-5p	RPL14
RFWD3																												hsa-miR-16-5p	CANX		hsa-miR-19b-3p	PHF13		hsa-miR-20a-5p	RFC3
FAM60A																												hsa-miR-16-5p	RAB3IP		hsa-miR-19b-3p	TGOLN2		hsa-miR-20a-5p	BTG3
MAP3K2																												hsa-miR-16-5p	RNMTL1		hsa-miR-19b-3p	ETV3		hsa-miR-20a-5p	WDR53
PSMB1																												hsa-miR-16-5p	YTHDC1		hsa-miR-19b-3p	TOM1L2		hsa-miR-20a-5p	FAM57A
SLC9A3R2																												hsa-miR-16-5p	BZW1		hsa-miR-19b-3p	DEPDC1		hsa-miR-20a-5p	RBL2
ADM																												hsa-miR-16-5p	CA12		hsa-miR-19b-3p	PPP2R5E		hsa-miR-20a-5p	SSRP1
THUMPD3																												hsa-miR-16-5p	ZDHHC16		hsa-miR-19b-3p	WDR45B		hsa-miR-20a-5p	PGM2L1
GLI1																												hsa-miR-16-5p	VMP1		hsa-miR-19b-3p	EIF4E2		hsa-miR-20a-5p	MCC
PLEKHG5																												hsa-miR-16-5p	TFRC		hsa-miR-19b-3p	CCDC137		hsa-miR-20a-5p	RAN
ATP5B																												hsa-miR-16-5p	RTN4		hsa-miR-19b-3p	SGSM3		hsa-miR-20a-5p	UBR5
LSS																												hsa-miR-16-5p	GPATCH8		hsa-miR-19b-3p	PPP1R15B		hsa-miR-20a-5p	SMAD4
HKR1																												hsa-miR-16-5p	GTF3C4		hsa-miR-19b-3p	SIVA1		hsa-miR-20a-5p	SALL3
RNF144A																												hsa-miR-16-5p	SRP19		hsa-miR-19b-3p	CEP350		hsa-miR-20a-5p	PRIM1
MUC1																												hsa-miR-16-5p	HOXA3		hsa-miR-19b-3p	HOXC8		hsa-miR-20a-5p	RAB10
PAM																												hsa-miR-16-5p	TRIM32		hsa-miR-19b-3p	C16orf70		hsa-miR-20a-5p	NUP188
PPP2CA																												hsa-miR-16-5p	FBXO41		hsa-miR-19b-3p	CEP350		hsa-miR-20a-5p	DNAJC27
TDG																												hsa-miR-16-5p	HIGD1A		hsa-miR-19b-3p	GDNF		hsa-miR-20a-5p	KIF2C
SLC35G1																												hsa-miR-16-5p	ATXN7L3B		hsa-miR-19b-3p	JARID2		hsa-miR-20a-5p	KIAA0247
KCNS3																												hsa-miR-16-5p	RPL36		hsa-miR-19b-3p	FAS		hsa-miR-20a-5p	TGFBR2
CASC3																												hsa-miR-16-5p	CYP26B1		hsa-miR-19b-3p	SEC61A1		hsa-miR-20a-5p	PRKAR1A
RYBP																												hsa-miR-16-5p	PLK1		hsa-miR-19b-3p	CREB3L2		hsa-miR-20a-5p	MXI1
EIF4E																												hsa-miR-16-5p	TMEM154		hsa-miR-19b-3p	NUFIP2		hsa-miR-20a-5p	BCAS4
DHX38																												hsa-miR-16-5p	FKBP1A		hsa-miR-19b-3p	ARPP19		hsa-miR-20a-5p	STAC2
PPP1R37																												hsa-miR-16-5p	ZMAT3		hsa-miR-19b-3p	CCND2		hsa-miR-20a-5p	SQSTM1
TAF15																												hsa-miR-16-5p	TLE4		hsa-miR-19b-3p	KATNAL1		hsa-miR-20a-5p	YTHDC1
GPRIN1																												hsa-miR-16-5p	PAGR1		hsa-miR-19b-3p	GMFB		hsa-miR-20a-5p	PTPN4
TIMM23																												hsa-miR-16-5p	MSL1		hsa-miR-19b-3p	TMBIM6		hsa-miR-20a-5p	CAPRIN2
SPRTN																												hsa-miR-16-5p	REL		hsa-miR-19b-3p	CREBL2		hsa-miR-20a-5p	ANKRD33B
RHOV																												hsa-miR-16-5p	IDH3A		hsa-miR-19b-3p	TMBIM6		hsa-miR-20a-5p	CCND1
EIF5A2																												hsa-miR-16-5p	GLRX		hsa-miR-19b-3p	PTPN4		hsa-miR-20a-5p	UQCRC1
CCNJ																												hsa-miR-16-5p	AXIN2		hsa-miR-19b-3p	RASSF5		hsa-miR-20a-5p	CEP97
KRT7																												hsa-miR-16-5p	CRIM1		hsa-miR-19b-3p	MTHFD1		hsa-miR-20a-5p	DPY19L4
FZD4																												hsa-miR-16-5p	CEP63		hsa-miR-19b-3p	RNF145		hsa-miR-20a-5p	TNRC6A
DYRK2																												hsa-miR-16-5p	RPRD1B		hsa-miR-19b-3p	MYLIP		hsa-miR-20a-5p	WASL
SSR3																												hsa-miR-16-5p	MGAT4A		hsa-miR-19b-3p	MAP3K14		hsa-miR-20a-5p	CEP170
ABCC4																												hsa-miR-16-5p	DMPK		hsa-miR-19b-3p	ATM		hsa-miR-20a-5p	FOXJ2
NPTN																												hsa-miR-16-5p	DNAJA2		hsa-miR-19b-3p	USP37		hsa-miR-20a-5p	KCNJ8
ILVBL																												hsa-miR-16-5p	COQ3		hsa-miR-19b-3p	ITGA2		hsa-miR-20a-5p	LIMA1
SEC14L3																												hsa-miR-16-5p	CXorf40B		hsa-miR-19b-3p	EIF4A2		hsa-miR-20a-5p	KCNK6
PPAT																												hsa-miR-16-5p	FOXK1		hsa-miR-19b-3p	SMARCA2		hsa-miR-20a-5p	USP32
ABL1																												hsa-miR-16-5p	C17orf75		hsa-miR-19b-3p	RORA		hsa-miR-20a-5p	ZDHHC20
PRDX2																												hsa-miR-16-5p	FAM73A		hsa-miR-19b-3p	SKIL		hsa-miR-20a-5p	SIKE1
CSRNP2																												hsa-miR-16-5p	DDX3X		hsa-miR-19b-3p	TGFBR2		hsa-miR-20a-5p	TCEAL1
UNKL																												hsa-miR-16-5p	TMBIM6		hsa-miR-19b-3p	KCNJ2		hsa-miR-20a-5p	NHLRC3
WNK1																												hsa-miR-16-5p	IKZF4		hsa-miR-19b-3p	ATF2		hsa-miR-20a-5p	CREB1
MFHAS1																												hsa-miR-16-5p	UXT		hsa-miR-19b-3p	PLXNC1		hsa-miR-20a-5p	CAPRIN2
R3HDM2																												hsa-miR-16-5p	PSMB5		hsa-miR-19b-3p	ANGEL2		hsa-miR-20a-5p	RPL17-C18orf32
ENPEP																												hsa-miR-16-5p	CRKL		hsa-miR-19b-3p	TMEM64		hsa-miR-20a-5p	MAGOHB
FAM199X																												hsa-miR-16-5p	ITGA2		hsa-miR-19b-3p	BTBD3		hsa-miR-20a-5p	WHSC1
LUC7L3																												hsa-miR-16-5p	ADK		hsa-miR-19b-3p	FXR1		hsa-miR-20a-5p	RGMB
HOXD1																												hsa-miR-16-5p	ASH1L		hsa-miR-19b-3p	PPTC7		hsa-miR-20a-5p	SUCO
LYPLA2																												hsa-miR-16-5p	DMD		hsa-miR-19b-3p	SEC23B		hsa-miR-20a-5p	ZNF174
DHX33																												hsa-miR-16-5p	RIF1		hsa-miR-19b-3p	UBN2		hsa-miR-20a-5p	RNGTT
FRAT2																												hsa-miR-16-5p	BZW1		hsa-miR-19b-3p	SERBP1		hsa-miR-20a-5p	RUNDC1
MATR3																												hsa-miR-16-5p	PRSS21		hsa-miR-19b-3p	MBNL3		hsa-miR-20a-5p	MAPRE3
LTV1																												hsa-miR-16-5p	PAK2		hsa-miR-19b-3p	ARPP19		hsa-miR-20a-5p	DNAJC28
RPL29																												hsa-miR-16-5p	OSGEPL1					hsa-miR-20a-5p	INPP5F
KRTAP5-9																												hsa-miR-16-5p	TUBB3					hsa-miR-20a-5p	GPR157
IP6K1																												hsa-miR-16-5p	ABL2					hsa-miR-20a-5p	RPL17
FAM208A																												hsa-miR-16-5p	CAAP1					hsa-miR-20a-5p	QSOX1
MRTO4																												hsa-miR-16-5p	NOC3L					hsa-miR-20a-5p	CHD9
ANAPC16																												hsa-miR-16-5p	TBP					hsa-miR-20a-5p	MAP7
TEF																												hsa-miR-16-5p	DMPK					hsa-miR-20a-5p	LASP1
STRN3																												hsa-miR-16-5p	IPO11					hsa-miR-20a-5p	LDLR
C2orf88																												hsa-miR-16-5p	CUL2					hsa-miR-20a-5p	PTPN4
NRARP																												hsa-miR-16-5p	RPL14					hsa-miR-20a-5p	ATL3
RNH1																												hsa-miR-16-5p	DHX36					hsa-miR-20a-5p	ATP2B1
PIAS3																												hsa-miR-16-5p	EGLN2					hsa-miR-20a-5p	VEZF1
NEBL																												hsa-miR-16-5p	SESTD1					hsa-miR-20a-5p	NUFIP2
TARDBP																												hsa-miR-16-5p	EML4					hsa-miR-20a-5p	ZNF354B
MYO19																												hsa-miR-16-5p	PANK1					hsa-miR-20a-5p	ANKRD33B
ZDHHC5																												hsa-miR-16-5p	TOX4					hsa-miR-20a-5p	GBP3
ZNF483																												hsa-miR-16-5p	GALNT7					hsa-miR-20a-5p	LRIF1
AHRR																												hsa-miR-16-5p	LSM5					hsa-miR-20a-5p	EPAS1
SEC24A																												hsa-miR-16-5p	CDS2					hsa-miR-20a-5p	MTPAP
PTBP1																												hsa-miR-16-5p	NCAPD2					hsa-miR-20a-5p	PTGES3
PIGF																												hsa-miR-16-5p	USP3					hsa-miR-20a-5p	SMAD4
NDOR1																												hsa-miR-16-5p	KIF23					hsa-miR-20a-5p	GRAMD1A
CYP24A1																												hsa-miR-16-5p	CREBL2					hsa-miR-20a-5p	ZBTB7A
MED1																												hsa-miR-16-5p	MAP4K2					hsa-miR-20a-5p	TRAPPC2
SRRM2																												hsa-miR-16-5p	YTHDC1					hsa-miR-20a-5p	NCOA3
SIRT1																												hsa-miR-16-5p	BCL2					hsa-miR-20a-5p	MAPRE3
PGR																												hsa-miR-16-5p	SLIRP					hsa-miR-20a-5p	E2F5
CXCR4																												hsa-miR-16-5p	TMEM189-UBE2V1					hsa-miR-20a-5p	CRCP
VEGFA																												hsa-miR-16-5p	USP42					hsa-miR-20a-5p	C9orf40
SLC7A5																												hsa-miR-16-5p	SH3BP4					hsa-miR-20a-5p	ARHGEF7
IRS1																												hsa-miR-16-5p	UBE4A					hsa-miR-20a-5p	FZD9
CRK																												hsa-miR-16-5p	DMRT2					hsa-miR-20a-5p	TMEM9B
FOXO3																												hsa-miR-16-5p	MSL1					hsa-miR-20a-5p	FAM129A
TOM1																												hsa-miR-16-5p	FDXR					hsa-miR-20a-5p	WEE1
SOX2																												hsa-miR-16-5p	HEATR3					hsa-miR-20a-5p	COX5A
SPRED1																												hsa-miR-16-5p	CCND1					hsa-miR-20a-5p	LSM3
PLK2																												hsa-miR-16-5p	TNPO3					hsa-miR-20a-5p	PDZD11
PIK3R2																												hsa-miR-16-5p	ZRANB2					hsa-miR-20a-5p	RAB11FIP1
AKT2																												hsa-miR-16-5p	CCND1					hsa-miR-20a-5p	UBC
NFKBIA																												hsa-miR-16-5p	FNTA					hsa-miR-20a-5p	APP
RGS3																												hsa-miR-16-5p	HOXD13					hsa-miR-20a-5p	SOX4
GRIN2B																												hsa-miR-16-5p	ANKRD17					hsa-miR-20a-5p	HIP1
RBMX																												hsa-miR-16-5p	YTHDC1					hsa-miR-20a-5p	RB1
EGFL7																												hsa-miR-16-5p	PTPN3					hsa-miR-20a-5p	UBFD1
CCNE2																												hsa-miR-16-5p	ABHD10					hsa-miR-20a-5p	ZFYVE9
ACVR2B																												hsa-miR-16-5p	KCND3					hsa-miR-20a-5p	ECI1
RHOU																												hsa-miR-16-5p	SRPR					hsa-miR-20a-5p	C2orf69
ADAM9																												hsa-miR-16-5p	ZCCHC3					hsa-miR-20a-5p	ZNF682
MMP7																												hsa-miR-16-5p	MRPS14					hsa-miR-20a-5p	FAM89A
LRP6																												hsa-miR-16-5p	ZFHX3					hsa-miR-20a-5p	QKI
KCNJ1																												hsa-miR-16-5p	ITGA2					hsa-miR-20a-5p	DDX5
TEK																												hsa-miR-16-5p	CHEK1					hsa-miR-20a-5p	MAP7
SLC45A3																												hsa-miR-16-5p	UTP15					hsa-miR-20a-5p	NUFIP2
SLC41A2																												hsa-miR-16-5p	IL36RN					hsa-miR-20a-5p	DTX2
HOXA9																												hsa-miR-16-5p	TMEM245					hsa-miR-20a-5p	TRIP10
VCAM1																												hsa-miR-16-5p	CDK9					hsa-miR-20a-5p	TP53INP1
TWF1																												hsa-miR-16-5p	PLSCR4					hsa-miR-20a-5p	PPP1R15B
CRKL																												hsa-miR-16-5p	CCNT2					hsa-miR-20a-5p	HAS2
TWF2																												hsa-miR-16-5p	DYNLL2					hsa-miR-20a-5p	ACVR1B
SLC39A6																												hsa-miR-16-5p	RBM15B					hsa-miR-20a-5p	STX6
CD97																												hsa-miR-16-5p	SHOC2					hsa-miR-20a-5p	UBE2V2
IGFBP2																												hsa-miR-16-5p	RCL1					hsa-miR-20a-5p	KLHL20
CXCL12																												hsa-miR-16-5p	SKI					hsa-miR-20a-5p	NR2C2
PIK3CG																												hsa-miR-16-5p	TMEM43					hsa-miR-20a-5p	C11orf30
TCF4																												hsa-miR-16-5p	TNPO1					hsa-miR-20a-5p	AFF1
PITPNC1																												hsa-miR-16-5p	RPL9					hsa-miR-20a-5p	YIPF4
MERTK																												hsa-miR-16-5p	PDE3B					hsa-miR-20a-5p	EPHA4
PTPN7																												hsa-miR-16-5p	AKR1B10					hsa-miR-20a-5p	RUFY2
STRBP																												hsa-miR-16-5p	FTH1					hsa-miR-20a-5p	PTPN23
PSTK																												hsa-miR-16-5p	KLC2					hsa-miR-20a-5p	LAPTM4A
MMD																												hsa-miR-16-5p	BZW1					hsa-miR-20a-5p	BHMT2
ZNF236																												hsa-miR-16-5p	PTCD3					hsa-miR-20a-5p	KLHL28
MTFR1																												hsa-miR-16-5p	IRAK3					hsa-miR-20a-5p	DNAJC28
MORF4L1																												hsa-miR-16-5p	EPM2AIP1					hsa-miR-20a-5p	SIRPA
TFG																												hsa-miR-16-5p	DICER1					hsa-miR-20a-5p	PDRG1
KIF5B																												hsa-miR-16-5p	ODF2L					hsa-miR-20a-5p	TGFBR2
C11orf16																												hsa-miR-16-5p	ELAC2					hsa-miR-20a-5p	STAT3
FRS2																												hsa-miR-16-5p	NAA25					hsa-miR-20a-5p	C9orf40
MMGT1																												hsa-miR-16-5p	OSBPL3					hsa-miR-20a-5p	QSOX1
SGMS1																												hsa-miR-16-5p	SLC38A1					hsa-miR-20a-5p	ZBTB33
LGR5																												hsa-miR-16-5p	FNBP1					hsa-miR-20a-5p	ZNF598
CDC6																												hsa-miR-16-5p	PHLPP2					hsa-miR-20a-5p	ADD1
HOXA7																												hsa-miR-16-5p	BCL2					hsa-miR-20a-5p	GINS4
RICTOR																												hsa-miR-16-5p	KIF5B					hsa-miR-20a-5p	CBX8
TRIM37																												hsa-miR-16-5p	DDX3X					hsa-miR-20a-5p	C1orf63
FYCO1																												hsa-miR-16-5p	MOB4					hsa-miR-20a-5p	GNB5
TSPAN6																												hsa-miR-16-5p	ZNF367					hsa-miR-20a-5p	MAD1L1
PEX26																												hsa-miR-16-5p	DOCK5					hsa-miR-20a-5p	C3orf38
DNAJB6																												hsa-miR-16-5p	SSRP1					hsa-miR-20a-5p	ACTR2
IL1A																												hsa-miR-16-5p	KCNC4					hsa-miR-20a-5p	UBE2C
ARNTL																												hsa-miR-16-5p	CDK1					hsa-miR-20a-5p	SLC7A11
GNAS																												hsa-miR-16-5p	NCOR2					hsa-miR-20a-5p	UBXN2A
TGFBR1																												hsa-miR-16-5p	MRPL3					hsa-miR-20a-5p	TNFAIP8L1
GNAQ																												hsa-miR-16-5p	GRB2					hsa-miR-20a-5p	TNFAIP8L1
PPP2R2C																												hsa-miR-16-5p	PPIG					hsa-miR-20a-5p	SCD
EML4																												hsa-miR-16-5p	UBN2					hsa-miR-20a-5p	ABI2
ATG16L1																												hsa-miR-16-5p	ATG9A					hsa-miR-20a-5p	ZBTB5
BOD1																												hsa-miR-16-5p	SYF2					hsa-miR-20a-5p	FBXO31
NEFH																												hsa-miR-16-5p	NUP155					hsa-miR-20a-5p	CSNK1A1
MTCH1																												hsa-miR-16-5p	RARS					hsa-miR-20a-5p	KPNA2
U2SURP																												hsa-miR-16-5p	EIF2B2					hsa-miR-20a-5p	RBM20
FICD																												hsa-miR-16-5p	ARL2					hsa-miR-20a-5p	NR2C2
INCENP																												hsa-miR-16-5p	C11orf83					hsa-miR-20a-5p	AKR7A2
C16orf70																												hsa-miR-16-5p	CCNE2					hsa-miR-20a-5p	CCDC88C
RBM27																												hsa-miR-16-5p	DNAJC2					hsa-miR-20a-5p	NACC2
NBPF3																												hsa-miR-16-5p	XYLT1					hsa-miR-20a-5p	KCNA7
AKIRIN2																												hsa-miR-16-5p	SPTBN2					hsa-miR-20a-5p	SGMS1
MCFD2																												hsa-miR-16-5p	RNPS1					hsa-miR-20a-5p	WNK3
ENTPD1																												hsa-miR-16-5p	MIB1					hsa-miR-20a-5p	ZC3H12C
ZNF676																												hsa-miR-16-5p	PISD					hsa-miR-20a-5p	GAK
LRRC59																												hsa-miR-16-5p	ORAI2					hsa-miR-20a-5p	ISCA2
GOLGA5																												hsa-miR-16-5p	RNMT					hsa-miR-20a-5p	PCNXL2
PPP1R2																												hsa-miR-16-5p	CAMSAP1					hsa-miR-20a-5p	MYLIP
ZCCHC14																												hsa-miR-16-5p	THEM4					hsa-miR-20a-5p	PPP6R3
ITGAV																												hsa-miR-16-5p	DLC1					hsa-miR-20a-5p	FHDC1
NUDT8																												hsa-miR-16-5p	ZNF460					hsa-miR-20a-5p	PTGER4
LAMC1																												hsa-miR-16-5p	PIM1					hsa-miR-20a-5p	GTF2H2C
ARL14EP																												hsa-miR-16-5p	CREBL2					hsa-miR-20a-5p	POLR3F
RAB2A																												hsa-miR-16-5p	RANGAP1					hsa-miR-20a-5p	ZBTB6
C9orf72																												hsa-miR-16-5p	GPRC5A					hsa-miR-20a-5p	ATL3
HSFY2																												hsa-miR-16-5p	TIMM10B					hsa-miR-20a-5p	NAGK
SS18																												hsa-miR-16-5p	PDCD1					hsa-miR-20a-5p	APOH
ALAD																												hsa-miR-16-5p	USP9X					hsa-miR-20a-5p	TGFBR2
FAM127B																												hsa-miR-16-5p	TCFL5					hsa-miR-20a-5p	ZNF532
AFF1																												hsa-miR-16-5p	RNF111					hsa-miR-20a-5p	FAM210A
DOCK10																												hsa-miR-16-5p	WDR75					hsa-miR-20a-5p	SHOC2
RAB39A																												hsa-miR-16-5p	RAB23					hsa-miR-20a-5p	GPN2
YES1																												hsa-miR-16-5p	RPL12					hsa-miR-20a-5p	FAM126B
PPFIA1																												hsa-miR-16-5p	TES					hsa-miR-20a-5p	AGO1
EPM2AIP1																												hsa-miR-16-5p	HSPE1-MOB4					hsa-miR-20a-5p	PIP4K2C
C5orf24																												hsa-miR-16-5p	TPBG					hsa-miR-20a-5p	PTPN4
CDCA4																												hsa-miR-16-5p	FAT3					hsa-miR-20a-5p	F3
TMEM245																												hsa-miR-16-5p	IPO4					hsa-miR-20a-5p	TWF1
CSRP2																												hsa-miR-16-5p	ARL2BP					hsa-miR-20a-5p	PHLPP2
C18orf25																												hsa-miR-16-5p	WIPI2					hsa-miR-20a-5p	GTF2H2C
CBY1																												hsa-miR-16-5p	KIF23					hsa-miR-20a-5p	ZNF514
MEF2D																												hsa-miR-16-5p	RCL1					hsa-miR-20a-5p	SKIL
ZNF701																												hsa-miR-16-5p	LSM11					hsa-miR-20a-5p	B2M
LYRM4																												hsa-miR-16-5p	SRSF1					hsa-miR-20a-5p	NCOA3
DAG1																												hsa-miR-16-5p	UBN2					hsa-miR-20a-5p	GPR155
IFNAR2																												hsa-miR-16-5p	TGFBR3					hsa-miR-20a-5p	KDM6B
CALM1																												hsa-miR-16-5p	PDCD6IP					hsa-miR-20a-5p	VEGFA
TRIM36																												hsa-miR-16-5p	ASNS					hsa-miR-20a-5p	DENND5B
HGS																												hsa-miR-16-5p	IVNS1ABP					hsa-miR-20a-5p	MPHOSPH8
PROM1																												hsa-miR-16-5p	LATS1					hsa-miR-20a-5p	PLEKHO2
CEP192																												hsa-miR-16-5p	GPR27					hsa-miR-20a-5p	MORF4L1
DCTN4																												hsa-miR-16-5p	ARIH1					hsa-miR-20a-5p	PRNP
KMT2A																												hsa-miR-16-5p	DDX41					hsa-miR-20a-5p	MAP3K12
ZNF473																												hsa-miR-16-5p	NISCH					hsa-miR-20a-5p	MTMR9
CTNNB1																												hsa-miR-16-5p	BTN3A3					hsa-miR-20a-5p	FCHO2
TROVE2																												hsa-miR-16-5p	CASKIN1					hsa-miR-20a-5p	NARS
SCAMP1																												hsa-miR-16-5p	ODF2L					hsa-miR-20a-5p	SMAD7
SLC30A6																												hsa-miR-16-5p	RPS3A					hsa-miR-20a-5p	TMEM127
ATF5																												hsa-miR-16-5p	CREG1					hsa-miR-20a-5p	MED17
ARL15																												hsa-miR-16-5p	SOWAHC					hsa-miR-20a-5p	MECP2
TNIP3																												hsa-miR-16-5p	HEATR2					hsa-miR-20a-5p	ANKRD50
NR2F6																												hsa-miR-16-5p	ZZEF1					hsa-miR-20a-5p	CEP170
SH2D1A																												hsa-miR-16-5p	UTP20					hsa-miR-20a-5p	TRIM37
TIPARP																												hsa-miR-16-5p	CALU					hsa-miR-20a-5p	ZC3H12C
CREB3L2																												hsa-miR-16-5p	FNDC3B					hsa-miR-20a-5p	DRAXIN
UGT2B17																												hsa-miR-16-5p	DDN					hsa-miR-20a-5p	TGFBR2
AGTR2																												hsa-miR-16-5p	DDX3Y					hsa-miR-20a-5p	RPS27
ECT2																												hsa-miR-16-5p	DCAF7					hsa-miR-20a-5p	TET3
PSME4																												hsa-miR-16-5p	USP31					hsa-miR-20a-5p	ZBTB33
TOR1AIP2																												hsa-miR-16-5p	PDIA6					hsa-miR-20a-5p	CD47
FAM208B																												hsa-miR-16-5p	CCNE1					hsa-miR-20a-5p	ZNF446
PARP2																												hsa-miR-16-5p	SNTB2					hsa-miR-20a-5p	C11orf68
CDC14B																												hsa-miR-16-5p	SNRPB2					hsa-miR-20a-5p	BCL2L11
SECISBP2																												hsa-miR-16-5p	CFL2					hsa-miR-20a-5p	LAMC1
CPS1																												hsa-miR-16-5p	GALNT3					hsa-miR-20a-5p	C12orf65
FAM177A1																												hsa-miR-16-5p	CALU					hsa-miR-20a-5p	RPS27A
VSIG1																												hsa-miR-16-5p	EDC3					hsa-miR-20a-5p	ZFYVE21
IRF1																												hsa-miR-16-5p	NNT					hsa-miR-20a-5p	GID4
SLC35F5																												hsa-miR-16-5p	TNFSF9					hsa-miR-20a-5p	ZNF785
UCK2																												hsa-miR-16-5p	EIF3M					hsa-miR-20a-5p	SKIL
NR2C1																												hsa-miR-16-5p	DHX38					hsa-miR-20a-5p	ZNF70
MROH7																												hsa-miR-16-5p	ZNF622					hsa-miR-20a-5p	SUCO
ZFP36L2																												hsa-miR-16-5p	KIF5B					hsa-miR-20a-5p	SHOC2
SLC25A13																												hsa-miR-16-5p	PDLIM5					hsa-miR-20a-5p	FOXC1
INSIG2																												hsa-miR-16-5p	BCL2					hsa-miR-20a-5p	LEPREL4
SLC35F6																												hsa-miR-16-5p	TMEM126A					hsa-miR-20a-5p	MASTL
CNN3																												hsa-miR-16-5p	TRIM4					hsa-miR-20a-5p	FAM210A
ZNF678																												hsa-miR-16-5p	PRKAA1					hsa-miR-20a-5p	SUGP1
SERPINA4																												hsa-miR-16-5p	C10orf54					hsa-miR-20a-5p	DLC1
TUBAL3																												hsa-miR-16-5p	MAP4					hsa-miR-20a-5p	HIF1A
COPG1																												hsa-miR-16-5p	GRB2					hsa-miR-20a-5p	IER3
BTBD7																												hsa-miR-16-5p	CCDC19					hsa-miR-20a-5p	ARSJ
TBC1D13																												hsa-miR-16-5p	ABCF2					hsa-miR-20a-5p	VPS26A
GNB2																												hsa-miR-16-5p	HIST1H1C					hsa-miR-20a-5p	MAPRE3
KIAA1191																												hsa-miR-16-5p	HSPH1					hsa-miR-20a-5p	RNF216
CA5B																												hsa-miR-16-5p	TFB1M					hsa-miR-20a-5p	TXK
PSMB5																												hsa-miR-16-5p	HAUS3					hsa-miR-20a-5p	GID4
RAC1																												hsa-miR-16-5p	HSPA1B					hsa-miR-20a-5p	FOXQ1
EEF2K																												hsa-miR-16-5p	UBE4A					hsa-miR-20a-5p	ZNF70
TAOK1																												hsa-miR-16-5p	CACNB2					hsa-miR-20a-5p	CBX5
ZNF682																												hsa-miR-16-5p	HMBOX1					hsa-miR-20a-5p	U2SURP
ETNK2																												hsa-miR-16-5p	UBN2					hsa-miR-20a-5p	OTUD4
KAT2B																												hsa-miR-16-5p	ASB6					hsa-miR-20a-5p	NIPA1
MGLL																												hsa-miR-16-5p	SEH1L					hsa-miR-20a-5p	NETO2
WHAMM																												hsa-miR-16-5p	RRP15					hsa-miR-20a-5p	ATG2B
TAS2R7																												hsa-miR-16-5p	SEC24A					hsa-miR-20a-5p	USP10
ELL2																												hsa-miR-16-5p	XPO7					hsa-miR-20a-5p	KPNA2
RNF170																												hsa-miR-16-5p	SRPRB					hsa-miR-20a-5p	RUNX3
CPEB2																												hsa-miR-16-5p	LRRFIP2					hsa-miR-20a-5p	TSR1
PAPD7																												hsa-miR-16-5p	PDPR					hsa-miR-20a-5p	RAB22A
PHF12																												hsa-miR-16-5p	CYCS					hsa-miR-20a-5p	GABPB1
BRMS1L																												hsa-miR-16-5p	HIST1H2BC					hsa-miR-20a-5p	GTF2IRD2
HSD17B12																												hsa-miR-16-5p	BIRC5					hsa-miR-20a-5p	PHF8
PTPRJ																												hsa-miR-16-5p	SEPT2					hsa-miR-20a-5p	SOX4
ZNF217																												hsa-miR-16-5p	RBM28					hsa-miR-20a-5p	GATA6
DTD1																												hsa-miR-16-5p	EFTUD2					hsa-miR-20a-5p	NAGK
NSFL1C																												hsa-miR-16-5p	USP42					hsa-miR-20a-5p	PXK
OSBP																												hsa-miR-16-5p	MCU					hsa-miR-20a-5p	FZD9
KAT7																												hsa-miR-16-5p	NGFRAP1					hsa-miR-20a-5p	ZBTB4
DCAF12																												hsa-miR-16-5p	LYRM5					hsa-miR-20a-5p	ACER2
PCDHB14																												hsa-miR-16-5p	PA2G4					hsa-miR-20a-5p	FOXJ3
SLC39A9																												hsa-miR-16-5p	RBPJ					hsa-miR-20a-5p	ZNF264
DDX17																												hsa-miR-16-5p	SLC9A1					hsa-miR-20a-5p	C11orf30
USP6NL																												hsa-miR-16-5p	GPR180					hsa-miR-20a-5p	ACBD5
LOX																												hsa-miR-16-5p	SLC25A22					hsa-miR-20a-5p	RNF19B
RGS5																												hsa-miR-16-5p	FAM150B					hsa-miR-20a-5p	LDHB
SLC7A11																												hsa-miR-16-5p	TUBB					hsa-miR-20a-5p	ELK4
FAM127A																												hsa-miR-16-5p	HEYL					hsa-miR-20a-5p	FAM102A
STX6																												hsa-miR-16-5p	ATAD5					hsa-miR-20a-5p	KIAA0100
NCKAP1																												hsa-miR-16-5p	ATL2					hsa-miR-20a-5p	GNS
KIAA0232																												hsa-miR-16-5p	SIK1					hsa-miR-20a-5p	CYB5A
ZNF529																												hsa-miR-16-5p	SNX16					hsa-miR-20a-5p	PCMTD1
SYT4																												hsa-miR-16-5p	ZNF622					hsa-miR-20a-5p	U2SURP
SCD																												hsa-miR-16-5p	HSPBP1					hsa-miR-20a-5p	NR2C2
KBTBD2																												hsa-miR-16-5p	FLOT2					hsa-miR-20a-5p	PNRC1
MAN1A2																												hsa-miR-16-5p	NAA25					hsa-miR-20a-5p	NME6
NAP1L2																												hsa-miR-16-5p	SNRPB2					hsa-miR-20a-5p	FMNL2
INPP5A																												hsa-miR-16-5p	HSPA4L					hsa-miR-20a-5p	CENPQ
SLC35E1																												hsa-miR-16-5p	ARHGDIA					hsa-miR-20a-5p	EGLN3
C2																												hsa-miR-16-5p	SKI					hsa-miR-20a-5p	KIF6
ATXN3																												hsa-miR-16-5p	NARS2					hsa-miR-20a-5p	MORF4L2
CCDC6																												hsa-miR-16-5p	CNP					hsa-miR-20a-5p	FAM117B
TPSG1																												hsa-miR-16-5p	POFUT1					hsa-miR-20a-5p	SOX4
IPMK																												hsa-miR-16-5p	TOR1A					hsa-miR-20a-5p	PVR
SRRD																												hsa-miR-16-5p	TNRC6B					hsa-miR-20a-5p	ACOT9
FAM65A																												hsa-miR-16-5p	ALG3					hsa-miR-20a-5p	HAUS2
CDKN1B																												hsa-miR-16-5p	CPEB3					hsa-miR-20a-5p	SMAD6
SOCS5																												hsa-miR-16-5p	WNT5A					hsa-miR-20a-5p	MARCH6
HECTD1																												hsa-miR-16-5p	MYO5A					hsa-miR-20a-5p	ULK1
MARCKS																												hsa-miR-16-5p	RPL4					hsa-miR-20a-5p	BCL2
BCLAF1																												hsa-miR-16-5p	DOCK9					hsa-miR-20a-5p	MTF1
TWSG1																												hsa-miR-16-5p	PIK3R1					hsa-miR-20a-5p	ORAI2
GLCE																												hsa-miR-16-5p	CCNT2					hsa-miR-20a-5p	PDGFB
ARF4																												hsa-miR-16-5p	STXBP3					hsa-miR-20a-5p	TSR1
ZMYND8																												hsa-miR-16-5p	RNH1					hsa-miR-20a-5p	RAB5B
SERPINH1																												hsa-miR-16-5p	CAPZA2					hsa-miR-20a-5p	SLC35F5
SKP2																												hsa-miR-16-5p	PHLDB2					hsa-miR-20a-5p	NFAT5
CLOCK																												hsa-miR-16-5p	SLFN13					hsa-miR-20a-5p	MAPK1
ZNF24																												hsa-miR-16-5p	FBXL20					hsa-miR-20a-5p	SPRED1
STAM																												hsa-miR-16-5p	SIRT4					hsa-miR-20a-5p	CEP57
FAM209A																												hsa-miR-16-5p	VPS4A					hsa-miR-20a-5p	WSB1
PCDHGA2																												hsa-miR-16-5p	BMS1					hsa-miR-20a-5p	ENPP5
RGL2																												hsa-miR-16-5p	CBX4					hsa-miR-20a-5p	CKAP2
HSBP1																												hsa-miR-16-5p	HOXA3					hsa-miR-20a-5p	TTC9
IRAK1																												hsa-miR-16-5p	PEX13					hsa-miR-20a-5p	DNAL1
C7orf31																												hsa-miR-16-5p	ECHDC1					hsa-miR-20a-5p	ANKH
SLC7A9																												hsa-miR-16-5p	RPL5					hsa-miR-20a-5p	XIAP
FAM98A																												hsa-miR-16-5p	KIF5B					hsa-miR-20a-5p	ZNF347
PUM1																												hsa-miR-16-5p	DCTN5					hsa-miR-20a-5p	CTR9
ZFX																												hsa-miR-16-5p	ASGR2					hsa-miR-20a-5p	BMP8B
AKT1S1																												hsa-miR-16-5p	VEGFA					hsa-miR-20a-5p	ZNF426
FBXO3																												hsa-miR-16-5p	FTL					hsa-miR-20a-5p	FAM126B
ARHGAP12																												hsa-miR-16-5p	MYO19					hsa-miR-20a-5p	HMGB3
MPLKIP																												hsa-miR-16-5p	SMURF2					hsa-miR-20a-5p	FUT10
SLC37A3																												hsa-miR-16-5p	ZNF367					hsa-miR-20a-5p	KRT10
RAB30																												hsa-miR-16-5p	AP2B1					hsa-miR-20a-5p	MYLIP
KRTAP4-5																												hsa-miR-16-5p	PDE4D					hsa-miR-20a-5p	WDR73
PPIL4																												hsa-miR-16-5p	MRPL1					hsa-miR-20a-5p	ZNF652
APC																												hsa-miR-16-5p	KCNS2					hsa-miR-20a-5p	C11orf30
CSNK1G3																												hsa-miR-16-5p	CHUK					hsa-miR-20a-5p	REV1
YWHAH																												hsa-miR-16-5p	MOB4					hsa-miR-20a-5p	PFKP
PCDHGA10																												hsa-miR-16-5p	ATP6V1E1					hsa-miR-20a-5p	CERS2
IL6ST																												hsa-miR-16-5p	POU2AF1					hsa-miR-20a-5p	SESN3
PRPF38B																												hsa-miR-16-5p	SZRD1					hsa-miR-20a-5p	NUP214
TNPO1																												hsa-miR-16-5p	IGF2R					hsa-miR-20a-5p	BNIP2
RAD51																												hsa-miR-16-5p	RP1L1					hsa-miR-20a-5p	FAM160B1
VAPB																												hsa-miR-16-5p	EIF1AX					hsa-miR-20a-5p	SAMD12
CLUAP1																												hsa-miR-16-5p	SLC7A5					hsa-miR-20a-5p	TMEM64
ACBD5																												hsa-miR-16-5p	SDHAF2					hsa-miR-20a-5p	AGFG2
GFI1																												hsa-miR-16-5p	FLOT2					hsa-miR-20a-5p	PKNOX1
RRM2B																												hsa-miR-16-5p	PHC3					hsa-miR-20a-5p	MKNK2
COPA																												hsa-miR-16-5p	PLAG1					hsa-miR-20a-5p	WAC
RPS19																												hsa-miR-16-5p	PHKB					hsa-miR-20a-5p	ATG2A
ZFPM1																												hsa-miR-16-5p	HYAL3					hsa-miR-20a-5p	KIAA1191
TBRG1																												hsa-miR-16-5p	AVL9					hsa-miR-20a-5p	GABBR1
KIF5A																												hsa-miR-16-5p	BCL11B					hsa-miR-20a-5p	GEMIN8
AFF4																												hsa-miR-16-5p	EZH1					hsa-miR-20a-5p	GPATCH11
IRF2BP1																												hsa-miR-16-5p	ZCCHC3					hsa-miR-20a-5p	PPP1R12B
C4BPB																												hsa-miR-16-5p	RPS6KB1					hsa-miR-20a-5p	FOXJ3
LRRC32																												hsa-miR-16-5p	PHLDA2					hsa-miR-20a-5p	PPP6C
SYPL1																												hsa-miR-16-5p	FLNA					hsa-miR-20a-5p	PARD6B
GINS2																												hsa-miR-16-5p	ACVR2A					hsa-miR-20a-5p	YOD1
SIGLEC10																												hsa-miR-16-5p	UTP14A					hsa-miR-20a-5p	ZNF681
SPPL3																												hsa-miR-16-5p	CPNE1					hsa-miR-20a-5p	BTN3A1
FZD7																												hsa-miR-16-5p	CPSF7					hsa-miR-20a-5p	SKIL
ENAH																												hsa-miR-16-5p	DNTTIP2					hsa-miR-20a-5p	TMEM134
SUCO																												hsa-miR-16-5p	GOT2					hsa-miR-20a-5p	RORA
UBE2W																												hsa-miR-16-5p	RCAN3					hsa-miR-20a-5p	ARHGAP1
PPP1R14C																												hsa-miR-16-5p	ZNF367					hsa-miR-20a-5p	ACAP2
ACBD3																												hsa-miR-16-5p	CLUH					hsa-miR-20a-5p	PTPRS
ACSL4																												hsa-miR-16-5p	TM9SF2					hsa-miR-20a-5p	TTPAL
DNAJB4																												hsa-miR-16-5p	PTPDC1					hsa-miR-20a-5p	EZH1
KCND3																												hsa-miR-16-5p	FGF2					hsa-miR-20a-5p	GTF2H3
ROCK2																												hsa-miR-16-5p	COL4A2					hsa-miR-20a-5p	FHL3
H3F3C																												hsa-miR-16-5p	CALU					hsa-miR-20a-5p	TPRG1L
ZNF608																												hsa-miR-16-5p	SFXN1					hsa-miR-20a-5p	PANK3
LPP																												hsa-miR-16-5p	HIGD1A					hsa-miR-20a-5p	NIPA1
PNO1																												hsa-miR-16-5p	ZNF622					hsa-miR-20a-5p	TOPORS
CLTA																												hsa-miR-16-5p	FLCN					hsa-miR-20a-5p	DNAJB9
MRGPRX1																												hsa-miR-16-5p	CSHL1					hsa-miR-20a-5p	KCNMB1
PTPN23																												hsa-miR-16-5p	PRPSAP1					hsa-miR-20a-5p	RPS27A
LCOR																												hsa-miR-16-5p	C16orf72					hsa-miR-20a-5p	ATL3
INPP5F																												hsa-miR-16-5p	LAMP2					hsa-miR-20a-5p	ZBTB4
RNF38																												hsa-miR-16-5p	KRT33B					hsa-miR-20a-5p	MTMR3
OTUD4																												hsa-miR-16-5p	TMEM109					hsa-miR-20a-5p	TMEM127
ARL10																												hsa-miR-16-5p	CDC23					hsa-miR-20a-5p	POLM
ADPRHL1																												hsa-miR-16-5p	BTRC					hsa-miR-20a-5p	DDHD1
ACSL1																												hsa-miR-16-5p	SRPR					hsa-miR-20a-5p	CXorf38
MANBAL																												hsa-miR-16-5p	TUBB					hsa-miR-20a-5p	ZNF331
CNIH4																												hsa-miR-16-5p	RALGAPB					hsa-miR-20a-5p	MEF2D
PDSS2																												hsa-miR-16-5p	L1CAM					hsa-miR-20a-5p	GTF2IRD2B
MESP2																												hsa-miR-16-5p	LRIF1					hsa-miR-20a-5p	GNPTAB
TMEM209																												hsa-miR-16-5p	WBP11					hsa-miR-20a-5p	POLR3G
C11orf74																												hsa-miR-16-5p	ABCC1					hsa-miR-20a-5p	AKAP11
CLIC4																												hsa-miR-16-5p	GOLT1B					hsa-miR-20a-5p	STK17B
MTMR9																												hsa-miR-16-5p	SNRPB2					hsa-miR-20a-5p	SGTB
GPC4																												hsa-miR-16-5p	TNRC6B					hsa-miR-20a-5p	YWHAZ
STX2																												hsa-miR-16-5p	YWHAH					hsa-miR-20a-5p	TNRC6B
AGBL2																												hsa-miR-16-5p	F2					hsa-miR-20a-5p	M6PR
CLEC4D																												hsa-miR-16-5p	SF3B3					hsa-miR-20a-5p	MAP7
PCMTD2																												hsa-miR-16-5p	CRIM1					hsa-miR-20a-5p	BMPR2
PSMD11																												hsa-miR-16-5p	KIF23					hsa-miR-20a-5p	FAM160B1
MALT1																												hsa-miR-16-5p	TCF3					hsa-miR-20a-5p	SEPT2
FLVCR1																												hsa-miR-16-5p	SLC9A6					hsa-miR-20a-5p	SALL3
TNKS																												hsa-miR-16-5p	ATG9A					hsa-miR-20a-5p	LDHD
SLC17A5																												hsa-miR-16-5p	RASSF2					hsa-miR-20a-5p	BTN3A1
CHRNA6																												hsa-miR-16-5p	UBE2V1					hsa-miR-20a-5p	KLHL36
CRH																												hsa-miR-16-5p	PRPF8					hsa-miR-20a-5p	MYC
TSPYL1																												hsa-miR-16-5p	PLAG1					hsa-miR-20a-5p	PAIP1
DEPDC1																												hsa-miR-16-5p	TTC1					hsa-miR-20a-5p	PIWIL2
GPD1L																												hsa-miR-16-5p	UBN2					hsa-miR-20a-5p	A1CF
TIFA																												hsa-miR-16-5p	KIF3B					hsa-miR-20a-5p	KLHL28
SNTN																												hsa-miR-16-5p	NAMPT					hsa-miR-20a-5p	PTGIS
TET3																												hsa-miR-16-5p	PISD					hsa-miR-20a-5p	ITGB8
RNF20																												hsa-miR-16-5p	TRAP1					hsa-miR-20a-5p	ZBTB33
PSMD12																												hsa-miR-16-5p	ORC4					hsa-miR-20a-5p	TFAM
HSD17B4																												hsa-miR-16-5p	ASGR2					hsa-miR-20a-5p	RRAGD
KCTD12																												hsa-miR-16-5p	SHOC2					hsa-miR-20a-5p	SGTB
WHSC1																												hsa-miR-16-5p	LMAN2L					hsa-miR-20a-5p	ZFYVE26
MSANTD4																												hsa-miR-16-5p	TUBB					hsa-miR-20a-5p	ATXN1
CALCOCO2																												hsa-miR-16-5p	SETD5					hsa-miR-20a-5p	OSTM1
RPE																												hsa-miR-16-5p	ACTR2					hsa-miR-20a-5p	CYBRD1
VPS52																												hsa-miR-16-5p	SSSCA1					hsa-miR-20a-5p	NR2F6
TSEN34																												hsa-miR-16-5p	LAMP2					hsa-miR-20a-5p	NKIRAS1
MRFAP1																												hsa-miR-16-5p	NAA15					hsa-miR-20a-5p	MORC1
EVI2B																												hsa-miR-16-5p	TMED1					hsa-miR-20a-5p	CSNK1A1
NCK2																												hsa-miR-16-5p	BTRC					hsa-miR-20a-5p	LYPD6
BMP8A																												hsa-miR-16-5p	ALDH18A1					hsa-miR-20a-5p	C15orf41
GOLT1B																												hsa-miR-16-5p	SLC25A29					hsa-miR-20a-5p	ELMSAN1
DYRK3																												hsa-miR-16-5p	AGO2					hsa-miR-20a-5p	PAQR5
ABCG2																												hsa-miR-16-5p	SLC16A3					hsa-miR-20a-5p	MAP3K3
SDCCAG3																												hsa-miR-16-5p	CYP27B1					hsa-miR-20a-5p	NARS
SPPL2A																												hsa-miR-16-5p	NUCKS1					hsa-miR-20a-5p	F2R
ABCC9																												hsa-miR-16-5p	ATP13A3					hsa-miR-20a-5p	SLC1A5
ARL5B																												hsa-miR-16-5p	TFAP2A					hsa-miR-20a-5p	PRKG1
HOXA10																												hsa-miR-16-5p	RAB1B					hsa-miR-20a-5p	RRN3
AKR1B10																												hsa-miR-16-5p	GABARAPL1					hsa-miR-20a-5p	NUFIP2
WIZ																												hsa-miR-16-5p	DLGAP3					hsa-miR-20a-5p	RPS27A
TBX4																												hsa-miR-16-5p	UBE2V1					hsa-miR-20a-5p	MAP7
MBD6																												hsa-miR-16-5p	CDC20					hsa-miR-20a-5p	ZNF800
ACACA																												hsa-miR-16-5p	PNPLA6					hsa-miR-20a-5p	DNAJC10
POLI																												hsa-miR-16-5p	SERBP1					hsa-miR-20a-5p	COIL
USP37																												hsa-miR-16-5p	FAM122B					hsa-miR-20a-5p	KIAA0513
TNRC18																												hsa-miR-16-5p	ZNRF3					hsa-miR-20a-5p	MYLIP
DIP2A																												hsa-miR-16-5p	AMOTL1					hsa-miR-20a-5p	KLF3
S100A11																												hsa-miR-16-5p	TSC22D2					hsa-miR-20a-5p	M6PR
MDM2																												hsa-miR-16-5p	ENY2					hsa-miR-20a-5p	MSMO1
MAPK7																												hsa-miR-16-5p	HTT					hsa-miR-20a-5p	HIST1H2BG
GGA2																												hsa-miR-16-5p	RPL14					hsa-miR-20a-5p	ARL1
PAPPA																												hsa-miR-16-5p	MMS19					hsa-miR-20a-5p	STAT3
COL5A1																												hsa-miR-16-5p	GTF3C3					hsa-miR-20a-5p	CHAF1A
FHIT																												hsa-miR-16-5p	GGA3					hsa-miR-20a-5p	MORF4L1
SAMD8																												hsa-miR-16-5p	PAG1					hsa-miR-20a-5p	SLC5A3
PHAX																												hsa-miR-16-5p	NOC4L					hsa-miR-20a-5p	FYCO1
ELP2																												hsa-miR-16-5p	LONP1					hsa-miR-20a-5p	FEM1A
NUDT3																												hsa-miR-16-5p	OCRL					hsa-miR-20a-5p	FKBP14
PDGFRA																												hsa-miR-16-5p	DDX3X					hsa-miR-20a-5p	TMEM133
CD44																												hsa-miR-16-5p	C1orf226					hsa-miR-20a-5p	RPRD1A
ZNF429																												hsa-miR-16-5p	WEE1					hsa-miR-20a-5p	ZDHHC20
USP42																												hsa-miR-16-5p	PANX1					hsa-miR-20a-5p	CCND1
IL10RB																												hsa-miR-16-5p	DDX6					hsa-miR-20a-5p	CENPQ
YWHAB																												hsa-miR-16-5p	FASN					hsa-miR-20a-5p	RUFY2
OAS3																												hsa-miR-16-5p	UBE2Q1					hsa-miR-20a-5p	SPTLC2
SMAD3																												hsa-miR-16-5p	JARID2					hsa-miR-20a-5p	PPP3R1
DNMT3A																												hsa-miR-16-5p	CPT1A					hsa-miR-20a-5p	POLR3A
ABAT																												hsa-miR-16-5p	PNISR					hsa-miR-20a-5p	RAB22A
CALM3																												hsa-miR-16-5p	CCNE2					hsa-miR-20a-5p	ELK4
DBT																												hsa-miR-16-5p	PDCD1					hsa-miR-20a-5p	SEPT2
FAXC																												hsa-miR-16-5p	ZBTB16					hsa-miR-20a-5p	E2F1
TIMM8A																												hsa-miR-16-5p	ZFHX4					hsa-miR-20a-5p	EIF4G2
TNF																												hsa-miR-16-5p	CTDSPL					hsa-miR-20a-5p	PRPF4
HAAO																												hsa-miR-16-5p	GOLGA5					hsa-miR-20a-5p	SLC30A7
NUBPL																												hsa-miR-16-5p	MRPL10					hsa-miR-20a-5p	PPP2R1A
VOPP1																												hsa-miR-16-5p	HNRNPA1L2					hsa-miR-20a-5p	PRNP
CTNND1																												hsa-miR-16-5p	C8orf44					hsa-miR-20a-5p	EXO5
KLF5																												hsa-miR-16-5p	AURKB					hsa-miR-20a-5p	CCDC71L
KLK10																												hsa-miR-16-5p	AGO4					hsa-miR-20a-5p	C3orf38
ADAMTS4																												hsa-miR-16-5p	BCAS2					hsa-miR-20a-5p	SPIB
PTGS2																												hsa-miR-16-5p	HIST1H4B					hsa-miR-20a-5p	ETF1
LRAT																												hsa-miR-16-5p	KIF1B					hsa-miR-20a-5p	GDI2
C1orf50																												hsa-miR-16-5p	BTF3					hsa-miR-20a-5p	ZNF417
TAF1D																												hsa-miR-16-5p	TFAP2A					hsa-miR-20a-5p	ENPP5
LRIT3																												hsa-miR-16-5p	ARHGAP32					hsa-miR-20a-5p	SHOC2
MYPN																												hsa-miR-16-5p	ARIH1					hsa-miR-20a-5p	NUP98
SCN2B																												hsa-miR-16-5p	ACOT8					hsa-miR-20a-5p	C19orf40
NPR1																												hsa-miR-16-5p	SLC9A2					hsa-miR-20a-5p	MAPK1
FAM71F2																												hsa-miR-16-5p	AIFM2					hsa-miR-20a-5p	PFKP
SLC2A14																												hsa-miR-16-5p	POLE4					hsa-miR-20a-5p	ANKRD33B
COL5A2																												hsa-miR-16-5p	EN2					hsa-miR-20a-5p	PHLPP2
BRAF																												hsa-miR-16-5p	IFRD2					hsa-miR-20a-5p	HMBOX1
HYPK																												hsa-miR-16-5p	GPR157					hsa-miR-20a-5p	MED16
SERPINE1																												hsa-miR-16-5p	CHEK1					hsa-miR-20a-5p	GPR157
GLRA3																												hsa-miR-16-5p	STXBP3					hsa-miR-20a-5p	KIAA0513
SECISBP2L																												hsa-miR-16-5p	EIF1AX					hsa-miR-20a-5p	FOXJ3
RUNDC1																												hsa-miR-16-5p	YARS2
FSCN1																												hsa-miR-16-5p	FURIN
DDX6																												hsa-miR-16-5p	STK38
ZNF607																												hsa-miR-16-5p	PMS1
GXYLT1																												hsa-miR-16-5p	DNAJC1
SLC25A25																												hsa-miR-16-5p	BZW1
MACC1																												hsa-miR-16-5p	SLC39A10
NFYB																												hsa-miR-16-5p	SSRP1
NR2C2																												hsa-miR-16-5p	SGTA
SLC25A16																												hsa-miR-16-5p	BRAT1
JAG1																												hsa-miR-16-5p	SLC4A1AP
THAP1																												hsa-miR-16-5p	CRKL
HNF4A																												hsa-miR-16-5p	UGT8
SFT2D2																												hsa-miR-16-5p	SBF1
YARS																												hsa-miR-16-5p	ELK4
CMPK1																												hsa-miR-16-5p	XPOT
SPTLC2																												hsa-miR-16-5p	USP53
DCTN6																												hsa-miR-16-5p	EIF4E
NFIC																												hsa-miR-16-5p	UBXN2B
IGFBP5																												hsa-miR-16-5p	CAMSAP1
FAM120AOS																												hsa-miR-16-5p	YIPF4
GALNT6																												hsa-miR-16-5p	DDX3X
SDC1																												hsa-miR-16-5p	UBE2V1
OR7D2																												hsa-miR-16-5p	CCDC83
GTF2H5																												hsa-miR-16-5p	ABL2
RAB22A																												hsa-miR-16-5p	CRHBP
MYO6																												hsa-miR-16-5p	DNAJC15
IL13RA1																												hsa-miR-16-5p	KCNG3
C1orf61																												hsa-miR-16-5p	IER2
TFPI																												hsa-miR-16-5p	DCTN5
ZNF277																												hsa-miR-16-5p	SRPRB
IER5																												hsa-miR-16-5p	MALSU1
TTC38																												hsa-miR-16-5p	PPP2R1B
ZBTB44																												hsa-miR-16-5p	SHOC2
LIMK1																												hsa-miR-16-5p	HNRNPA2B1
PLEKHA1																												hsa-miR-16-5p	AP5Z1
NAPEPLD																												hsa-miR-16-5p	TELO2
FGD6																												hsa-miR-16-5p	C15orf39
CREG2																												hsa-miR-16-5p	ALDH2
COMMD2																												hsa-miR-16-5p	TXLNG
UBE2V2																												hsa-miR-16-5p	PPP6C
MAPK1																												hsa-miR-16-5p	FLCN
COL1A1																												hsa-miR-16-5p	MOV10
SYT7																												hsa-miR-16-5p	RPH3AL
CERS4																												hsa-miR-16-5p	PDIA6
CCR6																												hsa-miR-16-5p	TBL1XR1
PPP2R5E																												hsa-miR-16-5p	USP15
PLEKHM3																												hsa-miR-16-5p	ARHGDIA
RREB1																												hsa-miR-16-5p	UBE2S
FNDC3B																												hsa-miR-16-5p	NAV2
BTF3L4																												hsa-miR-16-5p	NUP50
MIER3																												hsa-miR-16-5p	SLC39A9
CASP5																												hsa-miR-16-5p	RBMS3
ENO4																												hsa-miR-16-5p	DESI1
MYCBP																												hsa-miR-16-5p	C20orf112
ZNF573																												hsa-miR-16-5p	CD97
MAP3K7																												hsa-miR-16-5p	TRAK1
PNPO																												hsa-miR-16-5p	NAPG
SLC30A9																												hsa-miR-16-5p	PABPC4
FSD2																												hsa-miR-16-5p	PURA
LRRC2																												hsa-miR-16-5p	DDX3Y
GJD2																												hsa-miR-16-5p	ASXL1
SLC25A33																												hsa-miR-16-5p	ZFHX4
PRRC2B																												hsa-miR-16-5p	PDF
ANKRD9																												hsa-miR-16-5p	CREB3L2
CHST10																												hsa-miR-16-5p	RPL21
PGLS																												hsa-miR-16-5p	CSNK1E
SKAP2																												hsa-miR-16-5p	HIST2H2BE
ZNF440																												hsa-miR-16-5p	LAMTOR3
PRR23A																												hsa-miR-16-5p	BNC2
RER1																												hsa-miR-16-5p	L2HGDH
COL3A1																												hsa-miR-16-5p	KDM2A
COASY																												hsa-miR-16-5p	PAPOLG
DENND5B																												hsa-miR-16-5p	SLC12A2
SLC7A2																												hsa-miR-16-5p	CHD3
DCUN1D1																												hsa-miR-16-5p	TRIM35
PPIC																												hsa-miR-16-5p	CMTM4
CFTR																												hsa-miR-16-5p	CCND1
GNG12																												hsa-miR-16-5p	RPS6KA3
MOB4																												hsa-miR-16-5p	HAUS3
ZNF800																												hsa-miR-16-5p	PNP
ZNF827																												hsa-miR-16-5p	FAM122A
FGF2																												hsa-miR-16-5p	THRAP3
ITSN2																												hsa-miR-16-5p	SHOC2
MAML3																												hsa-miR-16-5p	VEGFA
TMEM192																												hsa-miR-16-5p	PSMD12
UBE2A																												hsa-miR-16-5p	RPS6KB1
CCT2																												hsa-miR-16-5p	DDX3X
TBX18																												hsa-miR-16-5p	BCL2
SPATA2																												hsa-miR-16-5p	SYPL1
ZC3H11A																												hsa-miR-16-5p	MTOR
ANKRD11																												hsa-miR-16-5p	ZBTB2
AP1G1																												hsa-miR-16-5p	SNRPC
MYO5A																												hsa-miR-16-5p	IWS1
LRRC1																												hsa-miR-16-5p	DMTF1
FAM122B																												hsa-miR-16-5p	MRPL12
AKIRIN1																												hsa-miR-16-5p	ARL10
NLN																												hsa-miR-16-5p	IPO7
SLC46A3																												hsa-miR-16-5p	CDCA4
ATF7IP																												hsa-miR-16-5p	PAFAH1B2
MYCN																												hsa-miR-16-5p	IDS
ARID1A																												hsa-miR-16-5p	SUPT16H
TFAP4																												hsa-miR-16-5p	E2F7
IL20RB																												hsa-miR-16-5p	EDC4
ARID1B																												hsa-miR-16-5p	NUCKS1
PEX5L																												hsa-miR-16-5p	ARL3
NUS1																												hsa-miR-16-5p	NAPG
TTN																												hsa-miR-16-5p	XKR7
CNEP1R1																												hsa-miR-16-5p	GOLPH3L
USP25																												hsa-miR-16-5p	AHCYL1
FAM217B																												hsa-miR-16-5p	TMEM168
PPP6C																												hsa-miR-16-5p	YBX1
ERCC8																												hsa-miR-16-5p	DHX30
FZD6																												hsa-miR-16-5p	TMEM189-UBE2V1
RAB39B																												hsa-miR-16-5p	CASK
NDUFC2-KCTD14																												hsa-miR-16-5p	HAUS3
JMY																												hsa-miR-16-5p	SLC27A4
TTC37																												hsa-miR-16-5p	MEGF8
TMBIM6																												hsa-miR-16-5p	AKAP11
CERK																												hsa-miR-16-5p	ABCC6
ZCCHC2																												hsa-miR-16-5p	CNPY3
ANKRD12																												hsa-miR-16-5p	MYO5B
GOLGA7																												hsa-miR-16-5p	IFRD1
MFSD6																												hsa-miR-16-5p	IRS4
TEX9																												hsa-miR-16-5p	PRICKLE2
NGFRAP1																												hsa-miR-16-5p	SLC9A6
STAMBP																												hsa-miR-16-5p	CDC42SE2
ATXN1L																												hsa-miR-16-5p	GTF3C2
ZBTB7A																												hsa-miR-16-5p	CCT3
PURB																												hsa-miR-16-5p	EFNB2
GRIK3																												hsa-miR-16-5p	CPEB3
RORA																												hsa-miR-16-5p	RALGAPB
ARAP2																												hsa-miR-16-5p	PNN
MAP3K4																												hsa-miR-16-5p	SLC29A1
RBM8A																												hsa-miR-16-5p	CARD10
ZNF645																												hsa-miR-16-5p	ATP13A3
ZNF749																												hsa-miR-16-5p	PNPO
ZNF350																												hsa-miR-16-5p	SESTD1
INO80D																												hsa-miR-16-5p	RBPJ
KCNQ5																												hsa-miR-16-5p	RRP12
ZNF480																												hsa-miR-16-5p	PTPN18
CCNK																												hsa-miR-16-5p	L2HGDH
CHAC1																												hsa-miR-16-5p	MRPL21
DAB2																												hsa-miR-16-5p	PPIP5K2
NFE2L2																												hsa-miR-16-5p	SZRD1
C2orf44																												hsa-miR-16-5p	SLC39A14
CMTM6																												hsa-miR-16-5p	XPO4
MORC3																												hsa-miR-16-5p	PPIG
APPBP2																												hsa-miR-16-5p	PSME3
SIX4																												hsa-miR-16-5p	HDGF
EIF2S3																												hsa-miR-16-5p	OTUB1
STX16																												hsa-miR-16-5p	FAM168A
MMS22L																												hsa-miR-16-5p	EGFR
PTEN																												hsa-miR-16-5p	GNAL
NEURL1B																												hsa-miR-16-5p	LRIG2
FKBP14																												hsa-miR-16-5p	C16orf72
POU2F1																												hsa-miR-16-5p	ABCC6
SPAG1																												hsa-miR-16-5p	PRRC2C
PLS1																												hsa-miR-16-5p	ATOX1
HNRNPF																												hsa-miR-16-5p	TPM3
BCL2L2-PABPN1																												hsa-miR-16-5p	CDKN1A
FGG																												hsa-miR-16-5p	KIF5B
LYSMD3																												hsa-miR-16-5p	WIPF1
NOTCH1																												hsa-miR-16-5p	ANKLE2
PHF3																												hsa-miR-16-5p	HIST2H2BE
PABPN1																												hsa-miR-16-5p	TUBB2A
FGA																												hsa-miR-16-5p	SRPR
PLAG1																												hsa-miR-16-5p	RACGAP1
FAM69A																												hsa-miR-16-5p	CCDC59
MBNL1																												hsa-miR-16-5p	PISD
NR2F2																												hsa-miR-16-5p	BCL11B
BICD2																												hsa-miR-16-5p	KIF14
PCCB																												hsa-miR-16-5p	PCMT1
MLEC																												hsa-miR-16-5p	NR1I2
HSPE1-MOB4																												hsa-miR-16-5p	GLP2R
LSM14A																												hsa-miR-16-5p	CRIM1
DCAF12L2																												hsa-miR-16-5p	LAMB3
FGB																												hsa-miR-16-5p	TBRG1
ZNF207																												hsa-miR-16-5p	YAP1
SEMA5A																												hsa-miR-16-5p	RPS6
RNF111																												hsa-miR-16-5p	LONRF2
LZIC																												hsa-miR-16-5p	ABCC4
HSPA13																												hsa-miR-16-5p	PPP1R11
CHORDC1																												hsa-miR-16-5p	TXN2
NACC1																												hsa-miR-16-5p	OTUD7B
DIDO1																												hsa-miR-16-5p	SNX16
MLANA																												hsa-miR-16-5p	MRPS25
ZBTB20																												hsa-miR-16-5p	CDK17
DYNC2LI1																												hsa-miR-16-5p	BRCA1
HNRNPAB																												hsa-miR-16-5p	RNF168
NANOGNB																												hsa-miR-16-5p	VEGFA
ZNF284																												hsa-miR-16-5p	RARB
SAMD12																												hsa-miR-16-5p	NRP1
GPR50																												hsa-miR-16-5p	LAMC1
WRN																												hsa-miR-16-5p	PSME3
WNT7A																												hsa-miR-16-5p	PSAT1
OXR1																												hsa-miR-16-5p	HCFC2
COX10																												hsa-miR-16-5p	YWHAH
NR3C1																												hsa-miR-16-5p	RAD23B
LMNB2																												hsa-miR-16-5p	LUC7L
SFXN4																												hsa-miR-16-5p	ZNF791
NT5C3A																												hsa-miR-16-5p	LURAP1L
CADM1																												hsa-miR-16-5p	RRP9
MET																												hsa-miR-16-5p	TECPR2
KIAA1462																												hsa-miR-16-5p	TMEM245
HIST1H3B																												hsa-miR-16-5p	KLHL40
TGFB1																												hsa-miR-16-5p	LAMTOR2
LIFR																												hsa-miR-16-5p	WDR5B
MAP1LC3B																												hsa-miR-16-5p	ZNF267
ALPPL2																												hsa-miR-16-5p	NLE1
PRDM2																												hsa-miR-16-5p	STK38
KIF21A																												hsa-miR-16-5p	SHOC2
ADAM17																												hsa-miR-16-5p	LIG4
FAM3C																												hsa-miR-16-5p	PAFAH1B1
CSRNP3																												hsa-miR-16-5p	EDC3
ZNF100																												hsa-miR-16-5p	C1orf21
CPEB4																												hsa-miR-16-5p	KPNA1
SWAP70																												hsa-miR-16-5p	PRKAR2A
DDC																												hsa-miR-16-5p	SMDT1
WSB1																												hsa-miR-16-5p	PSAT1
POU5F1																												hsa-miR-16-5p	PLCXD2
MAP4K2																												hsa-miR-16-5p	DDHD2
NDRG2																												hsa-miR-16-5p	RAB9B
ERG																												hsa-miR-16-5p	EEF1A1
SAMD5																												hsa-miR-16-5p	ANKMY1
ARF6																												hsa-miR-16-5p	NIN
SNTB1																												hsa-miR-16-5p	STK38
CCDC80																												hsa-miR-16-5p	OSCAR
HIST1H2AH																												hsa-miR-16-5p	STEAP3
RAB3IP																												hsa-miR-16-5p	BCL2
MAP3K11																												hsa-miR-16-5p	HIST1H2AJ
DEK																												hsa-miR-16-5p	GPR27
REL																												hsa-miR-16-5p	XKR8
AIM1																												hsa-miR-16-5p	PHYHIP
SOX9																												hsa-miR-16-5p	TTLL12
FAM45A																												hsa-miR-16-5p	GANAB
ZNF451																												hsa-miR-16-5p	KPNA1
TIRAP																												hsa-miR-16-5p	TARBP2
NR1D2																												hsa-miR-16-5p	EIF1
BTG1																												hsa-miR-16-5p	GPAA1
SLC16A5																												hsa-miR-16-5p	DCTN5
RPS6KB1																												hsa-miR-16-5p	DNAJC9
ERBB4																												hsa-miR-16-5p	IGF1R
BNIP3																												hsa-miR-16-5p	MAP4
C1orf27																												hsa-miR-16-5p	NPR3
AGPS																												hsa-miR-16-5p	C19orf54
TPM3																												hsa-miR-16-5p	ENTPD7
CLSTN2																												hsa-miR-16-5p	SRPK1
FLI1																												hsa-miR-16-5p	CIB1
RBM18																												hsa-miR-16-5p	MYO5A
SLC16A10																												hsa-miR-16-5p	WNK3
CRAMP1L																												hsa-miR-16-5p	GTF2H1
AQR																												hsa-miR-16-5p	CLASP1
MAP2K6																												hsa-miR-16-5p	LPHN1
STAT1																												hsa-miR-16-5p	TM4SF1
ANKRD28																												hsa-miR-16-5p	NDUFA9
MUC19																												hsa-miR-16-5p	NPRL3
NUP43																												hsa-miR-16-5p	ARG2
TMOD3																												hsa-miR-16-5p	RAD23B
CD28																												hsa-miR-16-5p	RPL14
CDH2																												hsa-miR-16-5p	C1orf21
CEP19																												hsa-miR-16-5p	LIN7C
NUDT1																												hsa-miR-16-5p	HMGN1
HDAC2																												hsa-miR-16-5p	PABPC4
PHF17																												hsa-miR-16-5p	PDK4
ZNF426																												hsa-miR-16-5p	HMOX1
PNMA3																												hsa-miR-16-5p	KLHL34
NFATC1																												hsa-miR-16-5p	POM121C
AAED1																												hsa-miR-16-5p	TNRC6B
EPAS1																												hsa-miR-16-5p	LARP1
TPRG1																												hsa-miR-16-5p	ZNF91
NIPSNAP1																												hsa-miR-16-5p	IFT74
CXorf23																												hsa-miR-16-5p	JARID2
NEDD9																												hsa-miR-16-5p	GSG1
ZNF445																												hsa-miR-16-5p	PRIM1
GOLM1																												hsa-miR-16-5p	STAU1
THSD7A																												hsa-miR-16-5p	PRKAR2A
UBXN2A																												hsa-miR-16-5p	AVL9
PPM1D																												hsa-miR-16-5p	SNX11
ILK																												hsa-miR-16-5p	RPL10L
UTP15																												hsa-miR-16-5p	NT5DC2
SOX11																												hsa-miR-16-5p	NOB1
KLF4																												hsa-miR-16-5p	LAMTOR4
ZBTB25																												hsa-miR-16-5p	RHOV
MUC4																												hsa-miR-16-5p	EN2
SRGAP1																												hsa-miR-16-5p	TNPO3
CCDC43																												hsa-miR-16-5p	SOCS2
IFNB1																												hsa-miR-16-5p	ZNF691
MMP14																												hsa-miR-16-5p	NEMF
HDAC11																												hsa-miR-16-5p	CAMSAP1
ADD3																												hsa-miR-16-5p	DNAJB4
CTNNBIP1																												hsa-miR-16-5p	ZNF644
CDK4																												hsa-miR-16-5p	E2F7
ZNF660																												hsa-miR-16-5p	HOXC8
ALG9																												hsa-miR-16-5p	RBMS1
F11R																												hsa-miR-16-5p	TRAM1
ZNF772																												hsa-miR-16-5p	RAB23
MMP1																												hsa-miR-16-5p	SRPRB
NANOG																												hsa-miR-16-5p	IRF4
CYP2C19																												hsa-miR-16-5p	RIMS3
ABRACL																												hsa-miR-16-5p	VPS45
MAP3K3																												hsa-miR-16-5p	PRNP
SMIM17																												hsa-miR-16-5p	AP3D1
TGFBR2																												hsa-miR-16-5p	SPTLC1
SMAD5																												hsa-miR-16-5p	USP7
ARL6IP5																												hsa-miR-16-5p	SEMA4C
TNR																												hsa-miR-16-5p	NAPG
PTP4A2																												hsa-miR-16-5p	TLK1
IMMP2L																												hsa-miR-16-5p	TMEM138
MIXL1																												hsa-miR-16-5p	MORF4L1
ORC4																												hsa-miR-16-5p	RBM6
NUFIP2																												hsa-miR-16-5p	ZFPL1
ZFAND3																												hsa-miR-16-5p	PPAP2B
TNFSF13																												hsa-miR-16-5p	MTHFD2
RTKN																												hsa-miR-16-5p	MED11
SRPX2																												hsa-miR-16-5p	ABL2
TMEM9B																												hsa-miR-16-5p	AURKB
IVNS1ABP																												hsa-miR-16-5p	SUPT5H
PODXL																												hsa-miR-16-5p	RARB
ANGPT2																												hsa-miR-16-5p	CTDSPL
CTGF																												hsa-miR-16-5p	TRAP1
C11orf65																												hsa-miR-16-5p	TBCCD1
MMP12																												hsa-miR-16-5p	TPM3
HBEGF																												hsa-miR-16-5p	JAK2
MAP2K4																												hsa-miR-16-5p	KIAA0226
SOCS7																												hsa-miR-16-5p	GABARAPL1
PAK4																												hsa-miR-16-5p	SUCLA2
AGTRAP																												hsa-miR-16-5p	TLK1
HLTF																												hsa-miR-16-5p	VEGFA
CCDC85C																												hsa-miR-16-5p	GEMIN5
GMFB																												hsa-miR-16-5p	OSBPL3
SP7																												hsa-miR-16-5p	PPP2R5C
PADI1																												hsa-miR-16-5p	MOV10
IRS2																												hsa-miR-16-5p	CCND1
SLC22A9																												hsa-miR-16-5p	EIF2B5
MTMR14																												hsa-miR-16-5p	NMD3
APH1A																												hsa-miR-16-5p	MINA
PPP3CA																												hsa-miR-16-5p	IRAK1BP1
RPS6KA3																												hsa-miR-16-5p	UBN2
PDGFD																												hsa-miR-16-5p	SRP68
ROBO2																												hsa-miR-16-5p	INO80D
SERINC5																												hsa-miR-16-5p	CHIC1
PHACTR2																												hsa-miR-16-5p	HEATR1
RRAGC																												hsa-miR-16-5p	CD274
ALDH3A1																												hsa-miR-16-5p	SERPINE2
EID2B																												hsa-miR-16-5p	RPS24
TGFBI																												hsa-miR-16-5p	MKX
ZFYVE9																												hsa-miR-16-5p	SYPL1
CLINT1																												hsa-miR-16-5p	NUFIP2
ITGB8																												hsa-miR-16-5p	SIRT4
ROCK1																												hsa-miR-16-5p	RAPH1
MEST																												hsa-miR-16-5p	HMGA1
UNC5D																												hsa-miR-16-5p	PISD
SNX24																												hsa-miR-16-5p	CBX2
NDUFA4																												hsa-miR-16-5p	NAPG
SLC26A2																												hsa-miR-16-5p	ACTR1A
MYRF																												hsa-miR-16-5p	DHX8
P4HA1																												hsa-miR-16-5p	FLCN
KDR																												hsa-miR-16-5p	CDCA4
PDCD4																												hsa-miR-16-5p	DCTN5
ELOVL5																												hsa-miR-16-5p	WDR43
GATAD2A																												hsa-miR-16-5p	TSR1
RPRD2																												hsa-miR-16-5p	ANAPC13
SNX12																												hsa-miR-16-5p	PVR
H2AFX																												hsa-miR-16-5p	SRSF1
COMMD10																												hsa-miR-16-5p	PON2
TBL3																												hsa-miR-16-5p	VCL
FRYL																												hsa-miR-16-5p	VEGFA
PTRH1																												hsa-miR-16-5p	ANPEP
MSL3																												hsa-miR-16-5p	RAF1
YRDC																												hsa-miR-16-5p	GOLT1B
ETNK1																												hsa-miR-16-5p	NOTCH2
PELO																												hsa-miR-16-5p	PIP4K2B
REXO1																												hsa-miR-16-5p	CDV3
MRPL20																												hsa-miR-16-5p	NDUFAF4
AGER																												hsa-miR-16-5p	VEZT
DMTF1																												hsa-miR-16-5p	VEGFA
EIF2A																												hsa-miR-16-5p	BAZ2A
OGT																												hsa-miR-16-5p	PPIL1
HDHD2																												hsa-miR-16-5p	H3F3B
ZRANB1																												hsa-miR-16-5p	EIF5B
MICU2																												hsa-miR-16-5p	NCKAP5L
SND1																												hsa-miR-16-5p	PSKH1
AK2																												hsa-miR-16-5p	TAF13
GPR180																												hsa-miR-16-5p	PPM1A
RAB12																												hsa-miR-16-5p	MKI67
FBXW7																												hsa-miR-16-5p	LMTK3
LAMTOR5																												hsa-miR-16-5p	FAM189B
FAT2																												hsa-miR-16-5p	TMEM189
CSDE1																												hsa-miR-16-5p	SBNO1
DKC1																												hsa-miR-16-5p	DIEXF
RNF149																												hsa-miR-16-5p	GNB1
GRAMD3																												hsa-miR-16-5p	ABCF1
POLDIP3																												hsa-miR-16-5p	THAP7
RNASEL																												hsa-miR-16-5p	ASGR2
CENPF																												hsa-miR-16-5p	DHX37
FURIN																												hsa-miR-16-5p	C2orf42
C2orf47																												hsa-miR-16-5p	HSPA1A
POLR1C																												hsa-miR-16-5p	HSPA8
GPATCH4																												hsa-miR-16-5p	CD180
MINK1																												hsa-miR-16-5p	GNB1
TMEM189																												hsa-miR-16-5p	WIPI2
MRRF																												hsa-miR-16-5p	VAMP8
PAQR3																												hsa-miR-16-5p	FAM122B
CACNA2D1																												hsa-miR-16-5p	E2F7
PDE4D																												hsa-miR-16-5p	TADA2B
RECK																												hsa-miR-16-5p	RAD51C
TMEM100																												hsa-miR-16-5p	TNFRSF10A
NT5DC1																												hsa-miR-16-5p	UBE2Q1
GTPBP8																												hsa-miR-16-5p	TMEM100
GNAL																												hsa-miR-16-5p	CCND1
PURA																												hsa-miR-16-5p	EIF3CL
UBR3																												hsa-miR-16-5p	IBTK
SRP72																												hsa-miR-16-5p	RPL6
KCNC4																												hsa-miR-16-5p	BDNF
RASSF5																												hsa-miR-16-5p	CDKN2AIPNL
CDK1																												hsa-miR-16-5p	B3GNT2
USP48																												hsa-miR-16-5p	CDC37L1
FAM129B																												hsa-miR-16-5p	SMPD4
CALR																												hsa-miR-16-5p	HM13
SEC24B																												hsa-miR-16-5p	DYNLL2
ZNRF2																												hsa-miR-16-5p	HSPA5
WARS																												hsa-miR-16-5p	VPS4A
RIMS3																												hsa-miR-16-5p	CHORDC1
TOR4A																												hsa-miR-16-5p	ROGDI
OSCAR																												hsa-miR-16-5p	XPO7
SLC3A2																												hsa-miR-16-5p	SF3A3
TASP1																												hsa-miR-16-5p	SRPR
AKT3																												hsa-miR-16-5p	CEP55
GNB1																												hsa-miR-16-5p	HSP90B1
TMEM43																												hsa-miR-16-5p	SLC38A2
CAMKV																												hsa-miR-16-5p	ONECUT2
HOXA3																												hsa-miR-16-5p	SLC2A3
FAM103A1																												hsa-miR-16-5p	SLC25A22
SACM1L																												hsa-miR-16-5p	NAT8L
AMOTL1																												hsa-miR-16-5p	HSPA1B
TLE4																												hsa-miR-16-5p	EEF1A1
TTLL12																												hsa-miR-16-5p	MAP4K2
L2HGDH																												hsa-miR-16-5p	PDHX
NAPG																												hsa-miR-16-5p	TIMM10B
CLIP4																												hsa-miR-16-5p	TMED7
STX4																												hsa-miR-16-5p	PIK3R1
KIAA2013																												hsa-miR-16-5p	POLDIP2
HSP90AA1																												hsa-miR-16-5p	KIF5B
HYOU1																												hsa-miR-16-5p	GRAMD3
NUP50																												hsa-miR-16-5p	ALG3
SEC11A																												hsa-miR-16-5p	SOCS5
ATP6V0E1																												hsa-miR-16-5p	TFPI
RAB1A																												hsa-miR-16-5p	TBC1D20
[truncated: 3,439 more rows]
[truncated: 9 more columns]

## Sheet: S4__EV_composition_GlobalMean
S4 TO FIG.5 different composition of miRNAs per vesicle between Q and SIPS cells at 2 timepoints
Up in SIPS on D7 rel. Q							Up in SIPS on D21 rel. Q
	miRNA	log2FC D7	AveExpr	p-value	adj. p-value		miRNA	log2FC D21	AveExpr	p-value	adj. p-value
	hsa-miR-181a-3p	5.45521	6.17669	0.0359339	0.485948		hsa-miR-23a-5p	3.65082	5.77699	0.0266369	0.391784
	hsa-miR-200c-3p	4.81272	5.63682	0.023882	0.485948		hsa-miR-138-1-3p	3.43345	4.36234	0.0236459	0.391784
	hsa-miR-196b-3p	4.36148	4.98413	0.0108244	0.485948		hsa-miR-1	2.74504	5.114	0.00282613	0.391784
	hsa-miR-149-5p	3.31605	4.3139	0.0233619	0.485948		hsa-miR-490-3p	2.58607	2.7127	0.0495095	0.511567
	hsa-miR-361-3p	2.97772	4.56099	0.0315354	0.485948		hsa-miR-483-5p	2.05504	6.099	0.0233229	0.391784
	hsa-miR-339-3p	2.81272	2.80169	0.0308487	0.485948		hsa-miR-708-5p	1.73504	1.31233	0.010831	0.391784
	hsa-miR-369-5p	2.67272	4.6014	0.00773148	0.485948		hsa-miR-487a-3p	1.62838	3.59566	0.0325484	0.441907
	hsa-miR-335-3p	2.59939	3.29836	0.0198518	0.485948		hsa-miR-29b-3p	1.26504	-0.892672	0.00649142	0.391784
	hsa-miR-642a-5p	2.34648	1.66669	0.0476733	0.485948		hsa-miR-485-3p	1.12504	0.543995	0.0452095	0.511567
	hsa-miR-24-1-5p	2.17272	4.19836	0.0233761	0.485948		hsa-miR-889-3p	1.09504	4.359	0.0130504	0.391784
	hsa-miR-23a-5p	2.10939	1.64502	0.0306739	0.485948		hsa-miR-663a	1.07838	3.77733	0.0235053	0.391784
	hsa-miR-638	2.07605	4.13169	0.00121173	0.42774		hsa-miR-137	0.868377	0.358995	0.0277977	0.392504
	hsa-miR-181c-5p	1.86605	5.02099	0.0464441	0.485948		hsa-miR-543	0.82171	-0.511005	0.0246596	0.391784
	hsa-miR-138-5p	1.79939	3.28669	0.0416426	0.485948
	hsa-miR-196a-5p	1.42272	2.74169	0.0156474	0.485948
	hsa-miR-660-5p	1.17939	5.23336	0.00393648	0.485948
	hsa-miR-483-3p	1.14605	0.968358	0.0243815	0.485948
	hsa-miR-337-5p	1.08939	-5.66831	0.0268037	0.485948
	hsa-miR-137	1.04605	4.91704	0.046754	0.485948
Down in SIPS on D7 rel. Q							Down in SIPS on D21 rel. Q
	miRNA	log2FC D7	AveExpr	p-value	adj. p-value		miRNA	log2FC D21	AveExpr	p-value	adj. p-value
	hsa-miR-654-5p	-4.24479	1.25502	0.0334773	0.485948		hsa-miR-766-3p	-4.26918	5.95699	0.0200024	0.391784
	hsa-miR-625-3p	-3.56228	3.53169	0.0319159	0.485948		hsa-miR-595	-3.62547	6.33464	0.00366402	0.391784
	hsa-let-7g-3p	-2.94061	-0.404975	0.0326656	0.485948		hsa-miR-222-5p	-2.47655	4.57734	0.00551079	0.391784
	hsa-miR-766-3p	-2.74728	4.91163	0.0155618	0.485948		hsa-miR-340-3p	-2.07785	5.7275	0.00890361	0.391784
	hsa-miR-95-3p	-2.01228	3.82836	0.0303452	0.485948		hsa-miR-199b-5p	-1.99829	-1.561	0.0182744	0.391784
	hsa-miR-655-3p	-1.48603	0.543358	0.0476529	0.485948		hsa-miR-625-3p	-1.88155	5.07984	0.0111085	0.391784
	hsa-miR-17-3p	-1.39061	2.7964	0.0496084	0.485948		hsa-miR-424-3p	-1.83496	1.27066	0.0130233	0.391784
	hsa-miR-144-3p	-1.32061	4.62502	0.013514	0.485948		hsa-miR-199a-5p	-1.66155	-2.90016	0.0185357	0.391784
	hsa-miR-486-5p	-1.25061	-0.913308	0.0404465	0.485948		hsa-miR-491-5p	-1.59162	3.129	0.0230009	0.391784
	hsa-miR-199b-5p	-1.17728	-3.25998	0.0385959	0.485948		hsa-let-7i-3p	-1.49496	2.55733	0.00583007	0.391784
	hsa-miR-381-3p	-1.12061	1.12836	0.0468524	0.485948		hsa-miR-342-3p	-1.31162	0.0323283	0.0231921	0.391784
	hsa-miR-615-3p	-1.07395	-0.173308	0.0194237	0.485948		hsa-miR-7-1-3p	-1.24496	2.49233	0.046455	0.511567
							hsa-miR-17-3p	-1.12496	0.785662	0.0104051	0.391784
							hsa-miR-155-5p	-1.02496	0.845662	0.0184021	0.391784
							hsa-miR-494-3p	-0.964956	4.219	0.0259797	0.391784
							hsa-miR-381-3p	-0.874956	1.09066	0.0256145	0.391784
							hsa-miR-455-5p	-0.834956	1.894	0.0465486	0.511567
							hsa-miR-214-3p	-0.82829	-1.46934	0.0385392	0.503864
							hsa-miR-424-5p	-0.691623	-3.23767	0.0418547	0.511567
changes of miRNA composition per vesicle over time
Up on D21 in Q rel. D7							Down on D21 in Q rel. D7
	miRNA	log2FC Q	AveExpr	p-value	adj. p-value		miRNA	log2FC Q	AveExpr	p-value	adj. p-value
	hsa-miR-1185-5p	5.67468	4.05876	0.0124452	0.952923		hsa-miR-378a-3p	-1.6418	0.678951	0.0446929	0.952923
	hsa-miR-590-3p	4.19496	5.80154	0.0047989	0.952923		hsa-miR-500a-5p	-2.09513	3.41562	0.032913	0.952923
	hsa-miR-125b-1-3p	3.58154	4.05062	0.0243797	0.952923		hsa-miR-142-5p	-3.68131	-3.13493	0.0481776	0.952923
	hsa-miR-663b	2.86487	5.17562	0.0175035	0.952923
	hsa-miR-30a-3p	2.66487	2.08228	0.0140488	0.952923
	hsa-miR-181a-2-3p	2.60154	2.83395	0.0134914	0.952923
	hsa-miR-339-3p	2.18154	3.84728	0.0126209	0.952923
Up on D21 in SIPS rel. D7							Down on D21 in SIPS rel. D7
	miRNA	log2FC SIPS	AveExpr	p-value	adj. p-value		miRNA	log2FC SIPS	AveExpr	p-value	adj. p-value
	hsa-miR-450b-5p	4.99955	5.14944	0.0127523	0.626686		hsa-miR-548c-5p	-1.47948	5.33507	0.0412475	0.709457
	hsa-miR-654-5p	4.57944	4.66534	0.00375222	0.46149		hsa-miR-149-5p	-1.65948	0.838402	0.0495691	0.807166
	hsa-miR-34c-3p	3.03386	5.67174	0.0102283	0.626686		hsa-miR-219a-5p	-1.66948	2.8434	0.0241364	0.648631
	hsa-miR-1972	2.07386	3.04174	0.0120869	0.626686		hsa-miR-125a-3p	-2.88948	4.61007	0.0337986	0.648631
	hsa-miR-30d-3p	2.01052	4.34007	0.02371	0.648631		hsa-miR-130b-5p	-2.94281	3.66674	0.0208918	0.648631
	hsa-miR-1	1.55719	4.52007	0.033304	0.648631		hsa-miR-99a-3p	-3.30888	3.89199	0.0381091	0.689975
							hsa-miR-431-3p	-3.6773	6.36453	0.03394	0.648631
							hsa-miR-377-5p	-3.7073	6.34953	0.0331209	0.648631
							hsa-miR-203a	-3.96067	1.75124	0.0270633	0.648631
							hsa-miR-595	-4.28899	6.00288	0.00302401	0.46149
							hsa-miR-181a-3p	-4.32045	5.06944	0.0205799	0.648631
							hsa-miR-188-3p	-5.73067	5.22624	0.00800505	0.626686
							hsa-miR-205-5p	-6.25399	3.33038	0.0252358	0.648631
							hsa-miR-766-3p	-6.96067	4.61124	0.00402462	0.46149

## Sheet: S5_Intracellular
S5 TO FIG6 differentially transcribed miRNAs in SIPS
Intracellular p adj < 0.05
SIPS Up D7						SIPS DOWN D7
miRNA	log2FC SIPS	baseMean	p-value	adj. p-value		miRNA	log2FC SIPS	baseMean	p-value	adj. p-value
hsa-miR-509-3-5p	3.14012	17.5731	4.94257e-12	3.05027e-10		hsa-miR-181a-2-3p	-1.65125	2762.21	3.8718e-15	4.18155e-13
hsa-miR-215-5p	3.05792	69.7848	2.94882e-22	6.36944e-20		hsa-miR-199a-5p	-1.62047	62878.4	2.4021e-29	1.03771e-26
hsa-miR-9-5p	2.88124	72.7301	2.44824e-20	3.52547e-18		hsa-miR-424-3p	-1.54202	2532.4	1.31602e-07	2.92635e-06
hsa-miR-139-5p	2.84961	31.0924	3.05267e-12	2.19792e-10		hsa-miR-199b-5p	-1.45352	16565.6	6.38121e-08	1.72293e-06
hsa-miR-1298-5p	2.75776	5.97413	3.34717e-08	9.63986e-07		hsa-miR-503-5p	-1.4242	1748.13	2.9011e-13	2.50655e-11
hsa-miR-3591-5p	2.56677	14.292	2.40222e-09	7.98275e-08		hsa-miR-210-3p	-1.41905	7704.05	2.37477e-11	1.13989e-09
hsa-miR-514a-3p	2.48597	14.953	3.22689e-07	6.33644e-06		hsa-miR-424-5p	-1.38099	1982.35	1.21934e-07	2.92635e-06
hsa-miR-190b	2.33868	12.456	5.04054e-07	9.46744e-06		hsa-miR-15b-5p	-1.3021	165.503	1.60546e-07	3.30265e-06
hsa-miR-182-5p	2.22152	114.605	4.41025e-10	1.58769e-08		hsa-miR-1260a	-1.23615	85.4972	3.22416e-06	4.97443e-05
hsa-miR-200c-3p	2.03133	75.4084	3.60942e-10	1.41752e-08		hsa-miR-16-2-3p	-1.17807	161.17	5.86398e-07	1.05552e-05
hsa-miR-891a-5p	1.93886	9.1409	6.70644e-05	0.000816684		hsa-miR-210-5p	-1.13415	68.4823	0.000166039	0.00174949
hsa-miR-378a-3p	1.92007	110.442	9.20996e-12	4.97338e-10		hsa-miR-585-3p	-1.04655	32.1699	0.00233216	0.0146014
hsa-miR-183-5p	1.88419	63.9769	7.0326e-08	1.78711e-06		hsa-miR-155-5p	-1.04258	2702.89	9.12903e-07	1.51682e-05
hsa-miR-375	1.74613	12.8724	0.000109803	0.00121628		hsa-miR-99a-5p	-1.0288	9275.09	2.79303e-05	0.000354879
hsa-miR-29b-3p	1.46262	763.8	1.25178e-10	5.4077e-09		hsa-miR-93-3p	-0.947077	19.1327	0.00962316	0.0433042
hsa-miR-138-5p	1.44363	249.576	9.08236e-07	1.51682e-05		hsa-miR-15b-3p	-0.933855	34.9752	0.00242337	0.0147572
hsa-miR-380-3p	1.38557	21.2302	0.000539025	0.0041582		hsa-miR-1304-3p	-0.91067	56.8304	0.00116742	0.0081343
hsa-miR-3117-3p	1.38287	79.3119	0.000193187	0.00198707		hsa-miR-4521	-0.886887	54.8928	0.000948659	0.00683035
hsa-miR-2682-3p	1.34221	13.8248	0.000858185	0.00628366		hsa-miR-21-5p	-0.884586	1.27043e+06	0.000673684	0.00501778
hsa-miR-200a-3p	1.27254	35.3187	0.000390484	0.00330763		hsa-miR-450a-2-3p	-0.881814	91.7813	0.00259378	0.0151421
hsa-miR-129-2-3p	1.21855	174.605	1.48971e-05	0.000207599		hsa-miR-1271-5p	-0.881357	108.476	0.000382531	0.00330507
hsa-miR-7706	1.18833	102.609	0.000263999	0.00253439		hsa-miR-214-3p	-0.876463	3283.54	2.72075e-06	4.3532e-05
hsa-miR-412-5p	1.18546	125.952	9.98392e-05	0.00113501		hsa-let-7c-5p	-0.861319	3656.49	0.00030978	0.00290924
hsa-miR-708-3p	1.16738	264.969	0.00033706	0.00303354		hsa-miR-3158-3p	-0.830534	44.1653	0.00429637	0.0220956
hsa-miR-2682-5p	1.16073	294.936	1.37536e-08	4.24396e-07		hsa-miR-17-5p	-0.785163	434.757	0.00880234	0.0404537
hsa-miR-708-5p	1.11264	392.66	0.000154028	0.0016635		hsa-miR-342-3p	-0.775395	671.072	0.00164124	0.0109079
hsa-miR-129-5p	1.06442	1261.55	4.93413e-06	7.35016e-05		hsa-miR-25-3p	-0.760574	6407.5	1.92675e-05	0.00025223
hsa-miR-192-5p	0.978826	248.823	1.35479e-07	2.92635e-06		hsa-miR-181b-5p	-0.759801	8527.57	0.00334707	0.0180742
hsa-miR-129-1-3p	0.93225	33.1034	0.0107012	0.0453228		hsa-miR-92b-5p	-0.758034	109.056	0.00820856	0.038845
hsa-miR-1197	0.924079	38.8819	0.00254291	0.0150485		hsa-miR-20a-5p	-0.75787	885.018	0.00398931	0.0210169
hsa-miR-194-5p	0.91457	78.7754	0.00591656	0.0293788		hsa-miR-1260b	-0.716852	199.989	0.00980167	0.0435642
hsa-miR-137	0.911331	656.363	0.00046077	0.00366787		hsa-miR-195-3p	-0.669959	154.125	0.00411549	0.0214204
hsa-miR-4775	0.894201	28.218	0.0080989	0.038845		hsa-miR-193a-5p	-0.662652	2064.39	0.000353338	0.00311515
hsa-miR-34a-5p	0.893482	2016.24	0.000236318	0.00237417		hsa-miR-452-5p	-0.66188	2126.96	0.00301454	0.0164846
hsa-miR-584-5p	0.874719	139.451	6.87894e-05	0.000816684		hsa-miR-224-5p	-0.660909	11553.7	0.001275	0.00874289
hsa-miR-29a-3p	0.85983	42516.7	6.99475e-05	0.000816684		hsa-miR-143-3p	-0.660896	315235	0.0056033	0.0281468
hsa-miR-486-5p	0.815058	245.175	0.00284553	0.0161746		hsa-miR-484	-0.631917	901.096	0.00300641	0.0164846
hsa-miR-31-3p	0.804493	273.571	0.00994169	0.0435642		hsa-miR-214-5p	-0.59829	208.441	0.00925944	0.0421061
hsa-miR-30a-5p	0.772451	79196	1.84272e-05	0.000248768		hsa-miR-148a-3p	-0.59454	51927	0.0044962	0.0228513
hsa-miR-376a-3p	0.738088	258.223	0.000969308	0.00686461		hsa-miR-199a-3p	-0.57108	114971	0.000243828	0.00239395
hsa-miR-377-3p	0.725235	236.086	0.0027541	0.0158636		hsa-miR-140-3p	-0.545129	5230.79	0.0109352	0.0458643
hsa-miR-494-3p	0.693265	2276.27	0.000447572	0.00366787		hsa-miR-28-3p	-0.543872	2810.38	0.00197342	0.0127241
hsa-miR-10a-3p	0.691642	1146.48	6.20582e-06	8.93638e-05		hsa-miR-125a-5p	-0.537191	13555.6	0.0100478	0.0435642
hsa-miR-323a-3p	0.684185	1713.38	0.00300728	0.0164846		hsa-miR-143-5p	-0.528579	1996.85	0.0117099	0.048178
hsa-miR-324-5p	0.652053	60.949	0.0114238	0.0474528		hsa-miR-93-5p	-0.520606	1404.88	0.00784692	0.0380884
hsa-miR-487a-3p	0.64792	148.6	0.00827254	0.038845		hsa-miR-199b-3p	-0.518625	86177.5	0.000466974	0.00366787
hsa-miR-221-3p	0.639778	126787	0.0003169	0.00291278		hsa-miR-106b-3p	-0.517841	1284.81	0.0101249	0.0435642
hsa-miR-1185-1-3p	0.63693	1128.73	0.00247738	0.0148643		hsa-miR-99b-5p	-0.514827	24798.8	0.00203771	0.0129455
hsa-miR-539-3p	0.633352	395.735	0.000452366	0.00366787
hsa-miR-487b-3p	0.618683	420.011	0.0017709	0.0115914
hsa-miR-30e-5p	0.612071	4838.93	0.000653525	0.00495303
hsa-miR-196a-3p	0.587314	903.368	0.00242537	0.0147572
hsa-miR-655-3p	0.569459	204.975	0.00880243	0.0404537
hsa-miR-221-5p	0.568604	6870.71	0.00162266	0.0109079
hsa-miR-758-3p	0.558652	292.87	0.0101852	0.0435642
hsa-miR-31-5p	0.437191	6324.97	0.00385216	0.0205448
hsa-miR-409-5p	0.436545	1428.07	0.00606852	0.0297909
SIPS Up D21						SIPS DOWN D21
miRNA	log2FC SIPS	baseMean	p-value	adj. p-value		miRNA	log2FC SIPS	baseMean	p-value	adj. p-value
hsa-miR-509-3-5p	3.75355	17.5731	1.21574e-15	1.75067e-13		hsa-miR-199b-5p	-1.94911	16565.6	4.13107e-13	2.40391e-11
hsa-miR-375	3.03212	12.8724	1.48932e-10	4.78157e-09		hsa-miR-424-5p	-1.85296	1982.35	1.50682e-12	7.23273e-11
hsa-miR-378a-3p	2.96515	110.442	4.77075e-24	1.03048e-21		hsa-miR-199a-5p	-1.73282	62878.4	2.60062e-33	1.12347e-30
hsa-miR-514a-3p	2.91268	14.953	1.39993e-09	3.55748e-08		hsa-miR-99a-5p	-1.67417	9275.09	9.33554e-12	4.03295e-10
hsa-miR-891a-5p	2.83439	9.1409	9.09092e-09	1.96364e-07		hsa-miR-181a-2-3p	-1.65251	2762.21	4.38618e-15	4.73708e-13
hsa-miR-183-5p	2.71388	63.9769	9.73027e-14	8.40695e-12		hsa-miR-15b-5p	-1.49883	165.503	3.43336e-09	7.80637e-08
hsa-miR-182-5p	2.62845	114.605	4.45169e-13	2.40391e-11		hsa-miR-424-3p	-1.44513	2532.4	8.00472e-07	1.08064e-05
hsa-miR-215-5p	2.11186	69.7848	5.37136e-11	1.93369e-09		hsa-miR-210-3p	-1.44294	7704.05	1.14748e-11	4.50647e-10
hsa-miR-122-5p	2.03664	225.503	1.32775e-05	0.00012204		hsa-miR-18a-5p	-1.23428	11.0554	0.0102323	0.0340028
hsa-miR-190b	2.02696	12.456	1.81545e-05	0.000163391		hsa-miR-503-5p	-1.23219	1748.13	3.5041e-10	1.00918e-08
hsa-miR-124-3p	1.95786	9.81638	8.26403e-05	0.000626326		hsa-miR-214-3p	-1.19765	3283.54	1.54958e-10	4.78157e-09
hsa-miR-9-5p	1.80724	72.7301	1.63225e-08	3.20514e-07		hsa-miR-21-5p	-1.17461	1.27043e+06	6.33718e-06	6.51824e-05
hsa-miR-129-2-3p	1.80099	174.605	3.91784e-10	1.05782e-08		hsa-miR-214-5p	-1.17384	208.441	4.95857e-07	7.38655e-06
hsa-miR-451a	1.77429	14.7579	0.000207089	0.00142004		hsa-miR-16-5p	-1.13817	1648.11	6.5166e-06	6.54691e-05
hsa-miR-200c-3p	1.75947	75.4084	9.33249e-08	1.4932e-06		hsa-miR-342-5p	-1.10842	15.5377	0.0113264	0.036515
hsa-miR-129-5p	1.72544	1261.55	1.8929e-13	1.36289e-11		hsa-miR-335-3p	-1.10256	189.158	0.00307927	0.0118772
hsa-miR-3117-3p	1.7047	79.3119	4.34577e-06	4.69343e-05		hsa-miR-542-3p	-1.09849	2262.33	7.04295e-05	0.000543314
hsa-miR-1	1.67508	17.6675	0.000247978	0.00162313		hsa-miR-155-5p	-1.07239	2702.89	4.8534e-07	7.38655e-06
hsa-miR-129-1-3p	1.67463	33.1034	1.27515e-05	0.000119754		hsa-miR-452-5p	-1.02585	2126.96	4.49624e-06	4.7375e-05
hsa-miR-1298-5p	1.66469	5.97413	0.0010599	0.0051447		hsa-miR-16-2-3p	-1.02093	161.17	3.00038e-05	0.000264523
hsa-miR-138-5p	1.63286	249.576	6.38988e-08	1.10417e-06		hsa-miR-4791	-1.01248	23.5211	0.0109484	0.0355618
hsa-miR-486-5p	1.63219	245.175	2.04999e-09	4.91997e-08		hsa-miR-3158-3p	-0.994529	44.1653	0.0012791	0.00594163
hsa-miR-184	1.6314	32.453	0.00142358	0.00647353		hsa-miR-1271-5p	-0.991088	108.476	0.000113982	0.000820668
hsa-miR-3591-5p	1.58785	14.292	0.000484532	0.00294814		hsa-miR-224-5p	-0.98785	11553.7	1.49289e-06	1.84265e-05
hsa-miR-412-5p	1.56202	125.952	5.58058e-07	7.77681e-06		hsa-miR-19b-3p	-0.980058	254.819	0.000891162	0.00458312
hsa-miR-323b-3p	1.40334	474.438	3.05296e-08	5.73426e-07		hsa-miR-548o-3p	-0.972307	31.2191	0.00350578	0.0132851
hsa-miR-380-3p	1.38175	21.2302	0.00062881	0.00347268		hsa-miR-335-5p	-0.967236	55.2587	0.0156557	0.0457359
hsa-miR-2682-3p	1.35373	13.8248	0.00196212	0.00830837		hsa-miR-450a-2-3p	-0.949248	91.7813	0.00152563	0.00672524
hsa-miR-212-3p	1.32898	43.0961	1.00362e-05	9.85375e-05		hsa-miR-20a-5p	-0.946665	885.018	0.00034142	0.00213758
hsa-miR-1197	1.29239	38.8819	0.000103951	0.000774258		hsa-miR-17-3p	-0.914135	32.5509	0.00622898	0.0220567
hsa-miR-584-5p	1.29074	139.451	1.2277e-08	2.52555e-07		hsa-miR-342-3p	-0.912	671.072	0.000225285	0.00152068
hsa-miR-323a-3p	1.25556	1713.38	5.63335e-08	1.014e-06		hsa-miR-1260a	-0.909833	85.4972	0.000977975	0.00488359
hsa-miR-29b-3p	1.235	763.8	6.98791e-08	1.16107e-06		hsa-miR-1304-3p	-0.905006	56.8304	0.0025049	0.0102086
hsa-miR-212-5p	1.18517	142.615	1.63524e-06	1.96229e-05		hsa-miR-224-3p	-0.898856	69.7334	0.00135069	0.00620741
hsa-miR-4775	1.16227	28.218	0.000644644	0.00348108		hsa-miR-25-3p	-0.893886	6407.5	5.20921e-07	7.50126e-06
hsa-miR-543	1.08348	1123.62	4.97256e-05	0.000397804		hsa-miR-450a-5p	-0.888117	956.508	0.000247439	0.00162313
hsa-miR-496	1.05073	39.9449	0.00156534	0.00676824		hsa-miR-106b-5p	-0.88472	374.092	0.00148018	0.00659214
hsa-miR-139-5p	1.02338	31.0924	0.0128533	0.0405302		hsa-miR-3613-5p	-0.874649	43.2078	0.00289842	0.0115539
hsa-miR-3177-3p	1.00501	16.3643	0.0144774	0.0437358		hsa-miR-19a-3p	-0.868206	51.7469	0.00396989	0.014913
hsa-miR-2682-5p	1.0024	294.936	1.40553e-06	1.78585e-05		hsa-miR-195-5p	-0.862291	372.22	0.00062567	0.00347268
hsa-miR-185-3p	0.99249	113.437	0.0016656	0.00712413		hsa-miR-181b-5p	-0.847163	8527.57	0.00107702	0.00516971
hsa-miR-708-3p	0.97539	264.969	0.00291522	0.0115539		hsa-miR-455-3p	-0.824282	583.455	0.000556842	0.00320741
hsa-miR-708-5p	0.970158	392.66	0.00102129	0.00501358		hsa-miR-625-3p	-0.808718	84.6545	0.00306217	0.0118772
hsa-miR-539-5p	0.962168	85.1155	0.000968014	0.00488359		hsa-miR-30d-3p	-0.762471	43.1975	0.0130992	0.040711
hsa-miR-134-5p	0.950246	4082.55	3.88895e-05	0.000329417		hsa-miR-455-5p	-0.761806	1677.35	0.000111464	0.000816141
hsa-miR-137	0.936309	656.363	0.000330134	0.00209732		hsa-miR-199a-3p	-0.731555	114971	2.60999e-06	2.96715e-05
hsa-miR-127-3p	0.921679	19769.5	5.27571e-05	0.000414383		hsa-miR-17-5p	-0.729338	434.757	0.0155978	0.0457359
hsa-miR-30c-2-3p	0.916239	324.799	0.00219484	0.0090302		hsa-miR-125b-2-3p	-0.721289	125.832	0.0171204	0.0489803
hsa-miR-380-5p	0.876616	41.2851	0.0105052	0.0344625		hsa-miR-199b-3p	-0.707844	86177.5	1.79479e-06	2.09554e-05
hsa-miR-1185-1-3p	0.862149	1128.73	4.65709e-05	0.000379597		hsa-miR-1180-3p	-0.706649	224.986	0.00401365	0.0149474
hsa-miR-154-3p	0.858251	68.3736	0.00296735	0.0116536		hsa-miR-450b-5p	-0.690906	1400.48	0.00936412	0.0316039
hsa-miR-409-3p	0.850217	8305.84	0.000833089	0.00433608		hsa-miR-28-5p	-0.684506	920.587	0.00198093	0.00830837
hsa-miR-485-3p	0.839147	738.551	0.000818264	0.00431085		hsa-miR-181a-5p	-0.675953	37065	0.00561225	0.0202041
hsa-miR-487b-3p	0.83318	420.011	3.06753e-05	0.000265035		hsa-miR-101-3p	-0.663194	12733.5	0.00127344	0.00594163
hsa-miR-221-3p	0.820451	126787	3.87686e-06	4.29436e-05		hsa-let-7f-2-3p	-0.661966	74.6773	0.017527	0.0498137
hsa-miR-29a-3p	0.811056	42516.7	0.000176402	0.00122912		hsa-let-7c-5p	-0.658345	3656.49	0.0058435	0.0208628
hsa-miR-494-3p	0.80825	2276.27	4.43629e-05	0.000368553		hsa-miR-320a	-0.633161	9761.51	0.0014438	0.00649709
hsa-miR-539-3p	0.807864	395.735	1.06741e-05	0.000102472		hsa-let-7i-5p	-0.621488	366740	0.00833144	0.02834
hsa-miR-370-3p	0.797447	6494.57	0.00156672	0.00676824		hsa-miR-193b-5p	-0.618288	190.27	0.0115558	0.0369786
hsa-miR-376a-3p	0.779563	258.223	0.000618956	0.00347268		hsa-miR-140-5p	-0.590004	568.029	0.0167845	0.0483395
hsa-miR-409-5p	0.775005	1428.07	1.26441e-06	1.65523e-05		hsa-miR-195-3p	-0.584184	154.125	0.0130405	0.040711
hsa-miR-487a-3p	0.770415	148.6	0.0021219	0.00881406		hsa-miR-99b-5p	-0.570217	24798.8	0.000635051	0.00347268
hsa-miR-329-3p	0.766899	530.424	0.000351384	0.00216854		hsa-miR-106b-3p	-0.550042	1284.81	0.00653585	0.0229552
hsa-miR-410-3p	0.761672	381.787	0.000725805	0.00387096		hsa-miR-30d-5p	-0.549219	23701.8	0.000509161	0.00301312
hsa-miR-377-5p	0.723492	85.1199	0.00681681	0.0237489		hsa-miR-93-5p	-0.526429	1404.88	0.00736348	0.0254482
hsa-miR-758-3p	0.711486	292.87	0.00120431	0.00571719		hsa-miR-148a-3p	-0.503179	51927	0.0162016	0.0469736
hsa-miR-30a-5p	0.691408	79196	0.000126279	0.000894303		hsa-miR-193a-5p	-0.491641	2064.39	0.00816117	0.0279811
hsa-miR-654-5p	0.687818	1390.58	0.000295991	0.00190848		hsa-miR-28-3p	-0.491154	2810.38	0.00532011	0.0193134
hsa-miR-127-5p	0.673467	1386.03	0.00265766	0.01073		hsa-miR-98-5p	-0.446879	2212.82	0.0123454	0.0392149
hsa-miR-1185-2-3p	0.648642	193.237	0.00467691	0.0171223		hsa-miR-145-3p	-0.427211	1516.95	0.0156688	0.0457359
hsa-miR-221-5p	0.624357	6870.71	0.000541972	0.00316395
hsa-miR-501-3p	0.618255	116.562	0.0137196	0.0423349
hsa-miR-369-3p	0.559669	509.427	0.000983501	0.00488359
hsa-miR-222-3p	0.558815	11305	0.0156336	0.0457359
hsa-miR-493-5p	0.539962	10599.3	0.0141582	0.0433782
hsa-miR-10a-3p	0.538043	1146.48	0.000496788	0.00298073
hsa-miR-889-3p	0.538028	1236.7	0.00333031	0.0127318
hsa-miR-30a-3p	0.531388	3361.31	0.0155811	0.0457359
hsa-miR-432-5p	0.513855	1621.84	0.0143184	0.0435602
hsa-miR-196a-3p	0.49953	903.368	0.0102289	0.0340028
hsa-miR-299-3p	0.474134	902.296	0.0105302	0.0344625
hsa-miR-654-3p	0.466586	3395.1	0.00411668	0.0152001
Up on D21 in SIPS rel. D7
miRNA	log2FC D21	baseMean	p-value	p.adj
hsa-miR-122-5p	2.50234	225.503	8.78727e-08	3.60278e-05
Down on D21 in SIPS rel. D7
miRNA	log2FC D21	baseMean	p-value	p.adj
hsa-miR-27a-5p	-1.29103	1888.59	0.000227478	0.0359418
hsa-miR-365a-5p	-0.816542	336.717	0.000262989	0.0359418
Up on D21 in Q rel. D7
miRNA	log2FC D21	baseMean	p-value	p.adj
hsa-miR-664a-5p	0.924844	165.361	7.38535e-05	0.00849315
hsa-miR-199b-5p	0.887801	16565.6	0.000952716	0.0469553
hsa-miR-101-3p	0.695079	12733.5	0.000731728	0.0420744
hsa-miR-199a-5p	0.585691	62878.4	4.77449e-05	0.008236
Down on D21 in Q rel. D7
miRNA	log2FC D21	baseMean	p-value	p.adj
hsa-miR-27a-5p	-1.77375	1888.59	3.93949e-07	0.000135912
hsa-miR-365a-5p	-0.803371	336.717	0.000280771	0.02364
hsa-miR-299-3p	-0.660533	902.296	0.000342609	0.02364

## Sheet: S6_Correlation_Top20
TO FIG.7 Correlation of intracellular and vesicular miRNA abundance
Top 20 miRNAs in cells
Quiescent (n=6)				SIPS (n=6)
miRNA	Rank in cells	Rank in EV		miRNA	Rank in cells	Rank in EV
hsa-miR-21-5p	1	1		hsa-miR-21-5p	1	1
hsa-miR-100-5p	2	16		hsa-miR-100-5p	2	18
hsa-let-7i-5p	3	38		hsa-let-7i-5p	3	43
hsa-miR-143-3p	4	11		hsa-miR-10a-5p	4	184
hsa-let-7a-5p	5	7		hsa-miR-143-3p	5	13
hsa-miR-10a-5p	6	185		hsa-let-7a-5p	6	8
hsa-let-7f-5p	7	43		hsa-miR-221-3p	7	6
hsa-miR-199a-3p	8	20		hsa-let-7f-5p	8	50
hsa-miR-27b-3p	9	12		hsa-let-7b-5p	9	25
hsa-miR-125b-5p	10	4		hsa-miR-30a-5p	10	101
hsa-let-7b-5p	11	25		hsa-miR-27b-3p	11	11
hsa-miR-221-3p	12	6		hsa-miR-125b-5p	12	2
hsa-miR-26a-5p	13	41		hsa-miR-22-3p	13	34
hsa-miR-22-3p	14	42		hsa-miR-199a-3p	14	24
hsa-miR-148a-3p	15	156		hsa-miR-26a-5p	15	54
hsa-miR-30a-5p	16	105		hsa-miR-29a-3p	16	17
hsa-miR-10b-5p	17	94		hsa-miR-10b-5p	17	97
hsa-let-7g-5p	18	26		hsa-miR-148a-3p	18	160
hsa-miR-181a-5p	19	35		hsa-miR-152-3p	19	46
hsa-miR-152-3p	20	56		hsa-let-7g-5p	20	29
Top 20 miRNAs in Evs
Quiescent (n=6)				SIPS (n=6)
miRNA	Rank in cells	Rank in EV		miRNA	Rank in cells	Rank in EV
hsa-miR-21-5p	1	1		hsa-miR-21-5p	1	1
hsa-miR-16-5p	87	2		hsa-miR-125b-5p	12	2
hsa-miR-451a	226	3		hsa-miR-16-5p	102	3
hsa-miR-125b-5p	10	4		hsa-miR-451a	221	3
hsa-miR-23a-3p	25	5		hsa-miR-23a-3p	22	5
hsa-miR-221-3p	12	6		hsa-miR-221-3p	7	6
hsa-let-7a-5p	5	7		hsa-miR-24-3p	25	7
hsa-miR-24-3p	28	8		hsa-let-7a-5p	6	8
hsa-miR-19b-3p	149	9		hsa-miR-19b-3p	166	9
hsa-miR-145-5p	30	10		hsa-miR-145-5p	29	10
hsa-miR-143-3p	4	11		hsa-miR-27b-3p	11	11
hsa-miR-27b-3p	9	12		hsa-miR-23b-3p	51	12
hsa-miR-20a-5p	105	13		hsa-miR-143-3p	5	13
hsa-miR-23b-3p	49	14		hsa-miR-126-3p	158	14
hsa-miR-126-3p	157	15		hsa-miR-222-3p	31	15
hsa-miR-100-5p	2	16		hsa-miR-20a-5p	131	16
hsa-miR-222-3p	42	17		hsa-miR-29a-3p	16	17
hsa-miR-103a-3p	27	18		hsa-miR-100-5p	2	18
hsa-miR-15a-5p	181	19		hsa-miR-1260a	201	19
hsa-miR-199a-3p	8	20		hsa-miR-103a-3p	28	20
Top 20 retained miRNAs
Quiescent (n=6)			SIPS (n=6)
miRNA	Δrank(I-E)		miRNA	Δrank(I-E)
hsa-miR-10a-5p	-179		hsa-miR-10a-5p	-180
hsa-miR-370-3p	-166		hsa-miR-7-5p	-167
hsa-miR-7-5p	-165		hsa-miR-221-5p	-165
hsa-miR-221-5p	-159		hsa-miR-146b-5p	-161
hsa-miR-146b-5p	-157		hsa-miR-494-3p	-154
hsa-miR-125b-1-3p	-156		hsa-miR-125b-1-3p	-148
hsa-miR-148a-3p	-141		hsa-miR-381-3p	-145
hsa-miR-181a-2-3p	-134		hsa-miR-21-3p	-144
hsa-miR-744-5p	-132		hsa-miR-148a-3p	-142
hsa-miR-27a-5p	-130		hsa-miR-370-3p	-140
hsa-miR-28-3p	-126		hsa-miR-744-5p	-136
hsa-miR-21-3p	-122		hsa-miR-34c-5p	-135
hsa-miR-494-3p	-119		hsa-miR-27a-5p	-123
hsa-miR-34c-5p	-119		hsa-miR-409-5p	-120
hsa-miR-92b-3p	-113		hsa-miR-92b-3p	-116
hsa-miR-452-5p	-110		hsa-miR-28-3p	-114
hsa-miR-381-3p	-108		hsa-miR-181a-2-3p	-112
hsa-miR-224-5p	-107		hsa-miR-323a-3p	-111
hsa-miR-30a-3p	-104		hsa-miR-654-3p	-110
hsa-miR-181b-5p	-100		hsa-miR-143-5p	-110
Top 20 secreted miRNAs
Quiescent (n=6)			SIPS (n=6)
miRNA	Δrank(I-E)		miRNA	Δrank(I-E)
hsa-miR-451a	223		hsa-miR-451a	218
hsa-miR-19a-3p	172		hsa-miR-1260a	182
hsa-miR-15a-5p	162		hsa-miR-19a-3p	176
hsa-miR-122-5p	153		hsa-miR-15a-5p	165
hsa-miR-1260a	149		hsa-miR-19b-3p	157
hsa-miR-126-3p	142		hsa-miR-126-3p	144
hsa-miR-19b-3p	140		hsa-miR-320c	141
hsa-miR-376b-3p	137		hsa-miR-29a-5p	136
hsa-miR-486-5p	136		hsa-miR-136-5p	123
hsa-miR-376a-5p	131		hsa-miR-15b-5p	119
hsa-miR-320c	119		hsa-miR-20a-5p	115
hsa-miR-376a-3p	117		hsa-miR-376b-3p	113
hsa-miR-29a-5p	116		hsa-miR-122-5p	111
hsa-miR-136-5p	110		hsa-miR-376a-5p	109
hsa-miR-652-3p	103		hsa-miR-376a-3p	108
hsa-miR-339-5p	102		hsa-miR-29c-3p	104
hsa-miR-215-5p	94		hsa-miR-106b-5p	104
hsa-miR-20a-5p	92		hsa-miR-339-5p	102
hsa-miR-331-3p	92		hsa-miR-652-3p	102
hsa-miR-17-3p	91		hsa-miR-16-5p	99
Top 20 selectively highly secreted miRNAs in SIPS –					Top 20 selectively highly secreted miRNAs in SIPS –						selectively highly secreted miRNAs in SIPS –
rank based method					ratio based method						Found with both methods
miRNA	ΔΔrank (ΔSIPS-ΔQ)				miRNA		norm. To GM	ΔΔrank (ΔSIPS-ΔQ)			miRNA
hsa-miR-542-5p	46				hsa-miR-1260a		4.48414	33			hsa-miR-542-5p
hsa-miR-149-5p	39				hsa-miR-339-3p		3.15377	38			hsa-miR-149-5p
hsa-miR-339-3p	38				hsa-miR-542-5p		3.10207	46			hsa-miR-30a-3p
hsa-miR-30a-3p	38				hsa-miR-370-3p		2.41263	26			hsa-miR-339-3p
hsa-miR-424-5p	34				hsa-miR-32-5p		2.25905	29			hsa-miR-424-5p
hsa-miR-1260a	33				hsa-miR-369-5p		2.23725	26			hsa-miR-1260a
hsa-miR-320b	30				hsa-miR-181c-5p		2.12172	14			hsa-miR-15b-5p
hsa-miR-15b-5p	29				hsa-miR-424-5p		1.99082	34			hsa-miR-32-5p
hsa-miR-32-5p	29				hsa-miR-30d-3p		1.94885	11			hsa-miR-369-5p
hsa-miR-708-5p	28				hsa-miR-15b-5p		1.90745	29			hsa-miR-370-3p
hsa-miR-369-5p	26				hsa-miR-149-5p		1.90674	39			hsa-miR-503-5p
hsa-miR-370-3p	26				hsa-miR-503-5p		1.87918	24			hsa-miR-181a-2-3p
hsa-miR-532-3p	25				hsa-miR-99a-5p		1.87643	16
hsa-miR-503-5p	24				hsa-miR-28-3p		1.82629	12
hsa-miR-20a-5p	23				hsa-miR-30a-3p		1.81016	38
hsa-miR-320c	22				hsa-miR-196a-5p		1.74916	20
hsa-miR-181a-2-3p	22				hsa-miR-452-5p		1.74564	10
hsa-miR-485-3p	21				hsa-miR-335-5p		1.74032	14
hsa-miR-193a-5p	21				hsa-miR-181a-2-3p		1.7118	22
hsa-miR-29a-5p	20				hsa-miR-1249		1.69672	9
Top 20 selectivley retained miRNAs in SIPS					Top 20 selectively retained miRNAs in SIPS –						selectively retained miRNAs in SIPS –
rank based method					ratio based method						Found with both methods
miRNA	ΔΔrank (ΔSIPS-ΔQ)				miRNA		norm. To GM	ΔΔrank (ΔSIPS-ΔQ)			miRNA
hsa-miR-215-5p	-57				hsa-miR-215-5p		0.05998	-57			hsa-miR-215-5p
hsa-miR-486-5p	-43				hsa-miR-139-5p		0.086899	-37			hsa-miR-486-5p
hsa-miR-122-5p	-42				hsa-miR-378a-3p		0.151931	-28			hsa-miR-122-5p
hsa-miR-409-5p	-38				hsa-miR-122-5p		0.163729	-42			hsa-miR-409-5p
hsa-miR-139-5p	-37				hsa-miR-204-5p		0.186909	-2			hsa-miR-139-5p
hsa-miR-381-3p	-37				hsa-miR-451a		0.210504	-5			hsa-miR-381-3p
hsa-miR-494-3p	-35				hsa-miR-486-5p		0.234806	-43			hsa-miR-494-3p
hsa-miR-411-5p	-29				hsa-miR-376a-5p		0.311884	-22			hsa-miR-411-5p
hsa-miR-377-3p	-29				hsa-miR-376b-3p		0.318336	-24			hsa-miR-377-3p
hsa-miR-378a-3p	-28				hsa-miR-494-3p		0.324101	-35			hsa-miR-378a-3p
hsa-miR-324-3p	-27				hsa-miR-491-5p		0.351175	-23			hsa-miR-376b-3p
hsa-miR-17-3p	-26				hsa-miR-34a-3p		0.362785	14			hsa-miR-491-5p
hsa-miR-382-3p	-26				hsa-miR-381-3p		0.386182	-37			hsa-miR-376a-5p
hsa-miR-532-5p	-25				hsa-miR-409-5p		0.461925	-38			hsa-miR-21-3p
hsa-miR-376b-3p	-24				hsa-miR-377-3p		0.463746	-29			hsa-miR-505-3p
hsa-miR-491-5p	-23				hsa-miR-326		0.470903	2
hsa-miR-455-5p	-23				hsa-miR-505-3p		0.472585	-21
hsa-miR-376a-5p	-22				hsa-miR-21-3p		0.477785	-22
hsa-miR-21-3p	-22				hsa-miR-539-5p		0.485591	-10
hsa-miR-505-3p	-21				hsa-miR-411-5p		0.487643	-29

## Sheet: S7_details_correlation
Q1 intra	1	Q1 Extra	28.4061		high expression: > Q3		SIPS	Q		d Rank negative	retained																																				5309.89	low epxression: < Q1 =25
Q2 intra	23	Q2 Extra	31.0625		middle expression: Q1 - Q3		intra 282 ranks	intra 282		d Rank positive	secreted																																				18810.4	middle expression: Q1 - Q3 50
Q3 intra	215.25	Q3 extra	33.6898		low epxression: < Q1		extra 282 rank	extra 282		dd Rank positive	more secreted SIPS																																				81497.5	high expression: > Q3 50
										dd Rank negative	more secreted Q																																				max	100
Count
228	SIPS cells					Q cells																																									transformed average
miRNA	Intra (TPM)	Extra (Ct-norm.)	rank_intra	rank_extra	ΔSIPS = rank_intra - rank_extra	Intra (TPM)	Extra (Ct-norm.)	rank_intra	rank_extra	ΔQ = rank_intra - rank_extra	ΔΔrank = ΔSIPS-ΔQ	Quantile extra SIPS	HDF161 Q 1week	HDF161 Q 3 week	HDF85 Q 1week	HDF85Q 3 week	HDF76 Q 1week	HDF76 Q 3 week	HDF161 SIPS 1 week	HDF161 SIPS 3 week	HDF85 SIPS 1 week	HDF85 SIPS 3 week	HDF76 SIPS 1 week	HDF76 SIPS 3 week	Average	Average SIPS	Average Q		Extracell	HDF161 Q 1week	HDF161 Q 3 week	HDF85 Q 1week	HDF85Q 3 week	HDF76 Q 1week	HDF76 Q 3 week	HDF161 SIPS 1 week	HDF161 SIPS 3 week	HDF85 SIPS 1 week	HDF85 SIPS 3 week	HDF76 SIPS 1 week	HDF76 SIPS 3 week	quantile Average extra	Average	Average SIPS	Average Q	count	extra/intra total	extra/intra SIPS	extra/intra Q
hsa-miR-10a-5p	39317.2	30.7434	4	184	-180	23745.5	33.9257	6	185	-179	-1	75	25692	25420	22714	24845	23822	19980	41700	44459	38100	43339	36367	31938	31531.3	39317.2	23745.5		hsa-miR-10a-5p	1113.8	501.269	552.123	978.901	391.925	791.353	7243.36	6512.76	4869.18	11342.7	2573.03	7812.13	25	3723.54	6116.66	673.824	12	0.11809	0.155572	0.0283769
hsa-miR-7-5p	844.67	32.7834	52	219	-167	638.17	35.6741	58	223	-165	-2	50	635	379	616	346	923	930	931	1034	707	517	956	923	741.417	844.67	638.17		hsa-miR-7-5p	219.988	361.898	183.4	116.567	368.222	103.837	3045.46	4970.08	1662.87	1184.02	511.736	709.914	25	1119.83	1487.35	200.551	12	1.5104	1.76086	0.31426
hsa-miR-221-5p	1235	31.8717	42	207	-165	695.33	35.1474	54	213	-159	-6	50	423	510	561	480	1286	912	913	1320	938	886	1877	1476	965.167	1235	695.33		hsa-miR-221-5p	44.6714	67.1558	522.341	716.598	663.721	780.458	7344.48	3740.6	193.94	3060.33	3442.53	8548.76	25	2427.13	2798.09	288.92	12	2.51473	2.26566	0.415515
hsa-miR-146b-5p	636.33	32.9834	62	223	-161	437.67	35.6941	67	224	-157	-4	50	326	431	478	557	434	400	728	1268	340	502	441	539	537	636.33	437.67		hsa-miR-146b-5p	137.309	630.101	387.713	197.406	137.609	65.7162	1848.89	5709.12	666.039	2434.61	819.872	335.81	25	1114.18	1294.81	197.79	12	2.07483	2.03481	0.451917
hsa-miR-494-3p	430.33	32.9101	68	222	-154	208.5	35.1274	93	212	-119	-35	50	203	167	182	116	315	268	524	620	335	275	468	360	319.417	430.33	208.5		hsa-miR-494-3p	267.108	511.801	174.713	214.528	701.565	175.847	5157.46	3038.31	470.961	961.72	1562.08	576.629	25	1151.06	1362.3	292.954	12	3.60363	3.16571	1.40505
hsa-miR-125b-1-3p	660.83	31.9484	61	209	-148	442.5	35.5941	66	222	-156	8	50	546	418	493	295	554	349	836	669	666	530	757	507	551.667	660.83	442.5		hsa-miR-125b-1-3p	22.3357	1167.69	15.336	1140.16	636.684	312.601	7709.62	8593.64	193.94	8419.23	897.181	3594.31	25	2725.23	2653.22	211.986	12	4.93999	4.01498	0.479065
hsa-miR-381-3p	4036.67	30.3234	23	168	-145	2915.83	32.2174	26	134	-108	-37	75	3501	2074	1855	1453	5400	3212	5068	3979	2914	2972	5411	3876	3476.25	4036.67	2915.83		hsa-miR-381-3p	2878.85	4971.41	1074.05	2083.83	3135.4	1134.77	20345.8	21160	2134.18	14557.5	5592.41	4015.88	50	6923.67	8183.65	2201.89	12	1.99171	2.02733	0.755151
hsa-miR-21-3p	282.17	33.0117	81	225	-144	278.83	34.7607	84	206	-122	-22	50	444	228	303	222	275	201	284	261	350	178	351	269	280.5	282.17	278.83		hsa-miR-21-3p	626.547	168.832	445.366	489.451	309.637	406.801	2324.08	2934.81	193.94	2520.46	781.041	1608.5	25	1067.46	1269.66	377.734	12	3.80555	4.49963	1.35471
hsa-miR-148a-3p	6151.67	30.0834	18	160	-142	7616.5	32.8691	15	156	-141	-1	75	8019	7427	4952	5398	10490	9413	6264	7035	4018	5167	7487	6939	6884.08	6151.67	7616.5		hsa-miR-148a-3p	943.108	2627.44	909.448	1536.06	2673.35	819.26	18722	17068.6	4298.04	22065	6379.62	4215.53	50	6854.78	9664.83	1401.57	12	0.995744	1.57109	0.184018
hsa-miR-370-3p	1126.67	30.7434	44	184	-140	664.83	35.5724	55	221	-166	26	75	962	547	444	255	1052	729	1620	1304	771	929	1149	987	895.75	1126.67	664.83		hsa-miR-370-3p	22.3357	563.957	287.785	23.1834	1493.45	791.353	9360.98	6512.76	2503.04	7178.53	7328.26	6523.81	25	3549.12	6116.66	215.199	12	3.96218	5.42897	0.32369
hsa-miR-744-5p	221.83	33.5817	91	227	-136	195.67	36.7524	95	227	-132	-4	50	124	199	166	143	294	248	242	257	148	196	207	281	208.75	221.83	195.67		hsa-miR-744-5p	44.6714	166.507	60.9201	72.7573	264.007	84.3419	1785.91	2738.28	529.859	884.963	728.737	234.184	25	632.928	855.265	94.9784	12	3.03199	3.8555	0.485401
hsa-miR-34c-5p	452.33	31.5084	67	202	-135	383.5	34.0174	70	189	-119	-16	50	209	330	384	336	580	462	359	518	417	287	514	619	417.917	452.33	383.5		hsa-miR-34c-5p	315.453	522.555	354.305	907.038	1139.7	1058.77	1362.88	18420.9	2134.18	1923.44	3873.05	5447.96	25	3121.68	3599.37	632.327	12	7.46963	7.9574	1.64883
hsa-miR-27a-5p	195	32.8467	98	221	-123	317.5	34.9024	79	209	-130	7	50	60	61	874	81	723	106	107	64	394	88	393	124	256.25	195	317.5		hsa-miR-27a-5p	22.3357	621.427	563.725	169.486	1188.09	1022.71	202.594	4834.17	5830.74	4449.64	86.7778	3773.01	25	1897.06	1423.5	342.397	12	7.40316	7.30001	1.07842
hsa-miR-409-5p	259.83	31.5251	83	203	-120	139	34.1107	110	192	-82	-38	50	135	133	120	77	223	146	334	385	177	169	247	247	199.417	259.83	139		hsa-miR-409-5p	44.6714	3954.94	625.492	325.163	2343.48	514.911	9042.11	15925.5	193.94	3081.62	3059.87	7704.57	25	3901.36	3557.94	592.729	12	19.5639	13.6934	4.26424
hsa-miR-92b-3p	320.33	31.0367	77	193	-116	337.5	34.0441	77	190	-113	-3	75	319	359	339	271	395	342	247	354	251	366	398	306	328.917	320.33	337.5		hsa-miR-92b-3p	923.699	1104.7	295.876	757.457	581.822	429.996	9360.98	10149	4094.48	7910.06	1037.76	4842.38	25	3457.35	4991.4	620.733	12	10.5113	15.582	1.83921
hsa-miR-28-3p	340.33	30.8484	75	189	-114	408.67	34.2507	69	195	-126	12	75	341	339	364	335	635	438	377	335	251	256	410	413	374.5	340.33	408.67		hsa-miR-28-3p	1017.83	652.322	15.336	1049.16	1776.02	1276.68	12181.8	7533.23	1277.82	10365.3	3124.16	8911.79	25	4098.46	5687.3	537.913	12	10.9438	16.7111	1.31625
hsa-miR-181a-2-3p	187.67	32.2501	101	213	-112	511.17	34.3774	63	197	-134	22	50	382	401	568	512	642	562	162	155	161	157	235	256	349.417	187.67	511.17		hsa-miR-181a-2-3p	22.3357	909.822	418.431	1789.1	811.492	1158.61	202.594	7798.89	733.912	8245.97	2537.61	4100.26	25	2394.09	2152.55	492.687	12	6.85166	11.4698	0.963842
hsa-miR-323a-3p	332.17	30.7717	76	187	-111	135.33	34.5274	111	202	-91	-20	75	208	126	127	78	156	117	438	435	254	348	279	239	233.75	332.17	135.33		hsa-miR-323a-3p	250.954	903.537	145.901	479.378	919.327	525.73	5965.57	24138.6	2758.11	8716.13	2645.37	5083.12	25	4377.64	5997.84	444.035	12	18.7279	18.0565	3.28112
hsa-miR-654-3p	570.83	30.5351	65	175	-110	372.33	33.4274	72	170	-98	-12	75	335	349	335	196	559	460	617	749	375	356	673	655	471.583	570.83	372.33		hsa-miR-654-3p	1521.5	866.731	332.877	1318.81	1383.81	928.127	12014.1	7585.63	2816.06	14061.6	3514.87	9819.95	25	4680.34	7066.74	951.809	12	9.92474	12.3798	2.55636
hsa-miR-143-5p	256.67	31.1284	84	194	-110	280.5	33.5507	83	178	-95	-15	50	191	144	313	250	476	309	215	203	206	192	321	403	268.583	256.67	280.5		hsa-miR-143-5p	904.69	1143.66	430.195	773.372	1063.37	1216.21	5413.87	4093.31	4038.11	8020.48	4208.98	3496.02	25	2900.19	4684.01	873.842	12	10.7981	18.2491	3.1153
hsa-miR-99b-3p	155.5	32.2701	107	214	-107	124.17	35.1157	113	211	-98	-9	50	109	103	113	91	182	147	186	162	137	121	162	165	139.833	155.5	124.17		hsa-miR-99b-3p	270.837	308.567	237.017	167.152	645.572	310.442	5965.57	5829.08	298.061	4358.07	1963.56	1032.19	25	1782.18	2122.91	295.339	12	12.745	13.6522	2.37851
hsa-miR-181b-5p	872.67	29.8217	50	151	-101	1281.67	32.3707	41	141	-100	-1	75	1214	1103	1581	1200	1388	1204	635	581	1171	997	1043	809	1077.17	872.67	1281.67		hsa-miR-181b-5p	1419.61	3257.25	2004.25	1108.98	4224.12	1387.41	13993.3	27536.4	9277.14	7483.37	12324.6	7339.67	50	7613.01	11587.1	1979.92	12	7.06762	13.2777	1.5448
hsa-miR-452-5p	218.17	30.9801	92	192	-100	362.83	33.8474	74	184	-110	10	75	131	224	295	288	688	551	182	185	183	114	303	342	290.5	218.17	362.83		hsa-miR-452-5p	377.748	704.004	480.651	1494.06	741.567	915.349	2941.72	6118.89	2875.23	6838.54	7078.63	7812.13	25	3198.21	5191.11	711.405	12	11.0093	23.7939	1.96071
hsa-miR-224-5p	1243.5	29.4617	41	137	-96	1863.83	32.3691	33	140	-107	11	75	1357	1374	1462	1193	2715	3082	940	980	988	781	2194	1578	1553.67	1243.5	1863.83		hsa-miR-224-5p	724.72	1584.09	1685.37	2906.4	2673.35	4034.51	16411.8	22522.1	7329.32	14061.6	13486.7	21049.5	50	9039.13	14871.1	1982.12	12	5.81793	11.9591	1.06347
hsa-miR-455-5p	198.17	30.9651	96	191	-95	264.5	33.0207	86	158	-72	-23	75	129	138	207	189	508	416	171	159	170	94	319	276	231.333	198.17	264.5		hsa-miR-455-5p	1664.97	1530.13	903.166	731.655	1264.57	1895.26	7447	9146.81	1819.67	4903.08	6335.55	5410.32	25	3587.68	5245.37	1261.77	12	15.5087	26.469	4.77038
hsa-miR-532-5p	251	30.6317	86	179	-93	147.67	33.4407	103	171	-68	-25	75	186	143	99	88	193	177	263	257	224	294	279	189	199.333	251	147.67		hsa-miR-532-5p	1129.35	3442.98	563.725	265.952	1622.98	743.494	11766.9	7429.52	2061.48	13211.2	6468.68	5410.32	25	4509.71	6609.05	943.075	12	22.624	26.3309	6.38637
hsa-miR-151a-3p	1474.83	29.3034	37	130	-93	1421.5	32.1091	38	133	-95	2	75	1226	1667	1131	1000	1972	1533	2253	1749	1056	965	1239	1587	1448.17	1474.83	1421.5		hsa-miR-151a-3p	2107.45	6036.26	1781.46	1093.71	5497.02	1312.57	24028.3	49634.4	5146.81	19748.7	14255.7	12089.8	50	11894.4	16595.8	2373.55	12	8.21339	11.2527	1.66975
hsa-miR-30a-5p	14406	27.9801	10	101	-91	7381.67	31.2257	16	105	-89	-2	75	4856	4772	6851	6524	11181	10106	13933	14408	14741	12219	14839	16296	10893.8	14406	7381.67		hsa-miR-30a-5p	3399.91	3515.32	3663.09	5976.23	5128.9	5250.28	64743.3	61107.1	12412.1	81215.8	22839.7	56325.5	75	27131.4	41528.9	4378.52	12	2.49053	2.88275	0.593161
hsa-miR-186-5p	290.17	30.4167	80	171	-91	199.33	33.4407	94	171	-77	-14	75	198	192	188	208	233	177	391	361	279	257	256	197	244.75	290.17	199.33		hsa-miR-186-5p	601.024	3039.13	656.589	444.186	1503.84	878.061	6482.99	27157.3	6559.93	7329.37	3442.53	6992.05	50	5423.92	7671.15	943.075	12	22.1611	26.4368	4.73122
hsa-miR-432-5p	268	30.1751	82	166	-84	173.33	33.4141	98	169	-71	-13	75	226	214	126	91	218	165	437	378	150	223	188	232	220.667	268	173.33		hsa-miR-432-5p	719.714	2835.6	643.077	632.543	2156.44	439.031	22890.2	16717.3	4010.22	7535.42	8714.82	5524.01	50	6068.2	9069.63	960.624	12	27.4994	33.8419	5.54217
hsa-miR-493-5p	1771.67	28.5484	32	115	-83	1113.5	31.4724	46	110	-64	-19	75	1570	1277	752	559	1405	1118	2488	2268	1150	1448	1723	1553	1442.58	1771.67	1113.5		hsa-miR-493-5p	1597.14	12672.7	2776.11	2674.44	7828.03	2147.11	49751.2	69227.3	17192.2	31204.6	16038.5	16287.7	75	19116.4	28007.5	3690.31	12	13.2515	15.8086	3.31416
hsa-miR-493-3p	343	30.0067	74	157	-83	277.83	32.7624	85	152	-67	-16	75	230	300	191	138	456	352	519	466	194	186	313	380	310.417	343	277.83		hsa-miR-493-3p	930.124	6885.95	872.401	768.03	3968.65	693.705	29995.2	16260.2	1595.14	8596.14	12239.5	13696.3	50	8041.77	10192.6	1509.16	12	25.9064	29.7159	5.43195
hsa-miR-769-5p	128.33	31.4134	115	198	-83	79.83	35.4957	126	220	-94	11	50	92	75	62	60	107	83	128	136	118	105	159	124	104.083	128.33	79.83		hsa-miR-769-5p	22.3357	1120.12	138.991	194.688	1213.06	166.362	3723.5	7126.87	3539.83	4038.13	2976.2	2859.41	25	2259.96	3844.36	226.95	12	21.713	29.9568	2.84291
hsa-miR-10b-5p	7612	27.8967	17	97	-80	6542.5	30.7174	17	94	-77	-3	75	8740	7225	7351	7960	4499	3480	8120	9207	8250	9377	6129	4589	7077.25	7612	6542.5		hsa-miR-10b-5p	6706.2	11989.1	4668.84	6405.16	7354.61	3299.83	96781.5	95887.4	23161.9	46970.7	21909.3	32802.1	75	29828.1	44000.4	6227.89	12	4.21464	5.7804	0.951913
hsa-miR-382-3p	351	29.9184	73	152	-79	224.67	32.4291	90	143	-53	-26	75	307	253	196	134	282	176	526	431	290	252	334	273	287.833	351	224.67		hsa-miR-382-3p	3306.94	4297.97	1135.29	1764.47	3914.02	424.076	29788	24138.6	1112.4	17432.3	11987.6	9684.75	50	9082.2	10835.9	1901.38	12	31.5537	30.8714	8.46297
hsa-miR-615-3p	196.67	30.3451	97	169	-72	225	32.6174	89	149	-60	-12	75	213	179	226	143	319	270	118	193	142	305	273	149	210.833	196.67	225		hsa-miR-615-3p	1847.4	1509.07	1183.5	1865.08	1877.29	1869.16	11287.5	9403.96	3491.1	15820.1	2874.82	16287.7	50	5776.4	8061.47	1668.72	12	27.3979	40.9899	7.41654
hsa-miR-424-3p	178.83	30.4867	103	173	-70	460.33	31.8557	65	122	-57	-13	75	463	410	604	296	591	398	112	146	193	176	303	143	319.583	178.83	460.33		hsa-miR-424-3p	3694.8	2701.3	2626.36	3678.8	2409.36	2207.47	6349.57	4208.39	12412.1	8477.79	6162.31	8789.1	25	5309.78	7307.83	2829.3	12	16.6147	40.8647	6.14624
hsa-miR-330-3p	52.83	32.1767	144	212	-68	40.67	34.5991	145	205	-60	-8	50	27	47	37	29	60	44	69	52	43	36	55	62	46.75	52.83	40.67		hsa-miR-330-3p	195.535	1398.28	1143.19	50.7389	1998.13	179.542	3621.68	12757.5	596.122	1135.78	1832.06	2354.98	25	2271.96	2264.89	422.506	12	48.5981	42.8714	10.3886
hsa-miR-30a-3p	552.67	29.3551	66	132	-66	360.33	33.6257	75	179	-104	38	75	246	248	297	319	560	492	509	508	356	709	562	672	456.5	552.67	360.33		hsa-miR-30a-3p	44.6714	2119.4	508.057	1891.11	1493.45	2398.93	15852.7	21604.6	10437.3	22065	6932.96	30818.3	50	9680.55	16011.6	829.575	12	21.206	28.9713	2.30226
hsa-miR-758-3p	52.67	32.0167	146	211	-65	28.5	35.2057	155	215	-60	-5	50	19	25	27	16	49	35	55	59	45	32	54	71	40.5833	52.67	28.5		hsa-miR-758-3p	22.3357	583.844	276.062	368.372	420.055	819.26	5413.87	12935.5	4066.2	195.29	1628.42	2899.32	25	2469.05	2530.54	277.478	12	60.8389	48.0451	9.73606
hsa-miR-145-3p	189	30.1184	100	162	-62	220.33	32.9624	91	157	-66	4	75	152	120	230	154	352	314	156	149	178	140	282	229	204.667	189	220.33		hsa-miR-145-3p	1925.85	1037.89	652.054	1473.49	1503.84	1780.64	15312.7	12494.9	6697.76	9604.35	6335.55	9036.19	50	5654.61	9433.18	1313.8	12	27.6284	49.911	5.96287
hsa-miR-199b-5p	991.17	28.2084	47	107	-60	3393.5	29.5124	23	66	-43	-17	75	1113	2640	1770	3023	4913	6902	994	1394	736	851	787	1185	2192.33	991.17	3393.5		hsa-miR-199b-5p	6344.45	21312.9	6931	15881.1	21239.1	27711.1	51863.9	104929	22372.9	35844.7	17919.6	25381.7	75	29811	35450.7	14357.6	12	13.5978	35.7666	4.23092
hsa-miR-433-3p	109.33	30.5601	120	177	-57	82	33.3341	123	166	-43	-14	75	108	98	51	45	102	88	129	163	67	123	86	88	95.6667	109.33	82		hsa-miR-433-3p	886.072	2855.33	1183.5	697.002	2600.25	201.995	16525.9	20581.4	3539.83	4638.6	5075.22	3960.59	25	5228.81	6945.33	1015.4	12	54.6565	63.5263	12.3829
hsa-miR-664a-3p	53.5	31.4217	143	199	-56	42.83	34.5724	143	204	-61	5	50	12	43	31	39	69	63	43	73	31	40	64	70	48.1667	53.5	42.83		hsa-miR-664a-3p	199.643	484.194	291.802	985.71	358.153	638.339	3621.68	5253.46	4736.03	5291.54	1167.54	5601.12	25	2385.77	3822.31	430.398	12	49.5315	71.445	10.049
hsa-miR-155-5p	243.17	29.5067	87	142	-55	435	31.7307	68	119	-51	-4	75	389	314	723	460	404	320	326	310	262	186	220	155	339.083	243.17	435		hsa-miR-155-5p	3216.51	5593.13	3278.56	2886.33	3576.75	1416.56	33513.3	28115	12412.1	16041	12239.5	3906.06	50	10516.2	14414.4	3085.37	12	31.0137	59.2773	7.09281
hsa-miR-134-5p	785.17	28.3334	55	108	-53	374.67	32.3991	71	142	-71	18	75	404	444	289	147	612	352	1385	1091	421	383	539	892	579.917	785.17	374.67		hsa-miR-134-5p	3085.48	3102.98	981.502	1957.8	1255.84	2317.22	57149.1	66869.2	20163.6	24653	17309.2	35895.1	75	19561.7	32508.5	1941.33	12	33.7319	41.4031	5.18143
hsa-miR-181c-5p	28.17	32.8267	167	220	-53	23.83	36.9507	161	228	-67	14	50	16	19	21	25	32	30	25	27	34	20	36	27	26	28.17	23.83		hsa-miR-181c-5p	22.3357	82.6785	103.885	77.4407	169.417	127.838	2009.25	4541.82	2240.28	708.917	1089.35	572.646	25	978.822	1443.37	82.781	12	37.647	51.2379	3.47382
hsa-miR-379-5p	1422.83	27.6384	39	91	-52	1257	30.2874	43	87	-44	-8	75	1033	1381	882	717	2085	1444	1964	1770	850	741	1258	1954	1339.92	1422.83	1257		hsa-miR-379-5p	10450.5	20586.9	6466.85	4405.28	14208.2	4006.64	88442	168111	23978.7	49305.9	39491.5	30605.4	75	38338.2	52627.5	8390.42	12	28.6124	36.9879	6.67496
hsa-miR-99b-5p	2946	27.3901	27	79	-52	3583	30.0791	22	81	-59	7	75	2715	3919	2960	3195	4422	4287	3304	3419	2168	2567	2589	3629	3264.5	2946	3583		hsa-miR-99b-5p	7389.59	14159.1	4969.37	9058.27	14012.6	12574.2	131294	65493	58229.6	61978.2	22525.2	85373.4	75	40588.1	62511.2	9693.68	12	12.4332	21.219	2.70546
hsa-miR-24-2-5p	133.5	30.1034	112	161	-49	108.67	33.3074	116	163	-47	-2	75	56	84	107	73	184	148	151	124	129	84	155	158	121.083	133.5	108.67		hsa-miR-24-2-5p	1024.91	1350.65	896.927	295.092	2748.51	1216.21	19789.5	16833.6	3060.31	9943.05	7430.56	9957.03	50	6212.19	9531.77	1034.36	12	51.3051	71.399	9.51839
hsa-miR-98-5p	298	29.2101	79	126	-47	288.5	31.7174	81	118	-37	-10	75	294	305	243	238	293	358	420	410	222	216	287	233	293.25	298	288.5		hsa-miR-98-5p	2576.65	8188.82	2718.97	1612.43	5128.9	1921.71	37704.4	59025.6	6424.93	18172.5	15708.5	7546.02	50	13894.1	17704.5	3113.95	12	47.3798	59.4111	10.7936
hsa-miR-193a-5p	236.83	29.3584	88	133	-45	323.5	32.4591	78	144	-66	21	75	146	202	284	215	598	496	152	193	205	249	303	319	280.167	236.83	323.5		hsa-miR-193a-5p	1210.41	1807.07	995.203	2360.73	2654.89	3057.59	18592.6	23155.3	9806.1	23485.3	9022.15	18580.5	50	9560.66	15975	1862.25	12	34.1249	67.4534	5.75656
hsa-miR-148b-3p	1645.5	27.2817	34	78	-44	1408.67	29.8774	39	75	-36	-8	75	1672	1328	950	1159	1806	1537	1929	1981	1031	1141	2177	1614	1527.08	1645.5	1408.67		hsa-miR-148b-3p	6659.88	28515.1	12755.6	7206.18	22450.1	4898.68	107386	186531	38417.2	86443.7	52836.8	26643.6	75	48395.3	67389.1	11148.2	12	31.6913	40.9536	7.91402
hsa-miR-409-3p	1472.5	27.4067	38	80	-42	818	30.6207	50	93	-43	1	75	1372	851	471	299	1148	767	2415	2253	896	1128	1124	1019	1145.25	1472.5	818		hsa-miR-409-3p	5447.13	20874.3	5668.88	2655.96	12283.5	4147.94	157222	208408	32983.7	70702.5	21458.4	33958.8	75	47984.3	61796.1	6659.64	12	41.8985	41.9668	8.14137
hsa-let-7f-5p	19237.7	26.1334	8	50	-42	19130.2	28.5824	7	43	-36	-6	75	21230	20248	15877	15334	19242	22850	20817	22478	15491	19868	18915	17857	19183.9	19237.7	19130.2		hsa-let-7f-5p	19636.9	62407.9	20721.6	15991.5	47790.4	21591.5	216266	419716	80097.2	131024	140407	83038.9	100	104891	149370	27355.2	12	5.46764	7.76444	1.42995
hsa-miR-130b-5p	22.83	32.3184	175	216	-41	23	34.5274	165	202	-37	-4	50	21	16	27	16	31	27	16	20	22	30	32	17	22.9167	22.83	23		hsa-miR-130b-5p	383.021	3234.75	1388.05	10.5929	1273.37	330.425	7871.62	8475.33	8020.43	661.443	1745.29	121.221	25	2792.96	2053.01	444.035	12	121.875	89.9262	19.3058
hsa-miR-487a-3p	27.83	31.9167	168	208	-40	13.33	35.2157	181	216	-35	-5	50	13	13	11	6	22	15	39	45	21	13	24	25	20.5833	27.83	13.33		hsa-miR-487a-3p	1459.52	147.999	116.877	279.174	539.109	115.214	4616.05	7378.2	723.808	3982.54	1304.48	3107.42	25	1980.87	2712.16	275.561	12	96.2364	97.4546	20.6722
hsa-let-7i-5p	43008.8	25.8001	3	43	-40	49334.3	28.3657	3	38	-35	-5	75	85258	62592	37249	45363	31676	33868	76195	63506	33809	37634	26137	20772	46171.6	43008.8	49334.3		hsa-let-7i-5p	29764	56245.1	19603.8	35734.2	36218.4	24291.7	423630	416817	113275	226550	103499	94727.7	100	131696	188190	31788.7	12	2.85232	4.37561	0.644353
hsa-miR-196a-5p	801.83	27.7717	54	94	-40	640.83	31.6991	57	117	-60	20	75	202	294	488	393	1223	1245	427	500	499	569	1304	1512	721.333	801.83	640.83		hsa-miR-196a-5p	936.594	2351.62	1896.14	4344.64	7561.38	7172.09	46742.4	24817.2	34623.5	60283.4	41168.5	122422	75	29526.6	47982.7	3153.7	12	40.9334	59.8415	4.92127
hsa-miR-26a-5p	11237.8	26.2551	15	54	-39	12171.2	28.4574	13	41	-28	-11	75	11400	10819	11339	11634	13299	14536	10800	12807	9792	11453	12632	9943	11704.5	11237.8	12171.2		hsa-miR-26a-5p	26824.8	64608.7	21304.2	21100.9	48122.8	18796.5	211815	428535	41174.5	162432	123938	88998.9	100	104804	137286	29831.1	12	8.95418	12.2164	2.45096
hsa-miR-26b-5p	975.5	27.5667	48	87	-39	978.5	30.0924	48	82	-34	-5	75	643	803	1001	913	1151	1360	860	1079	883	834	1228	969	977	975.5	978.5		hsa-miR-26b-5p	9484	18298.5	8299.72	6101.8	17859.9	5001.61	64296.1	174039	29933.3	43522.5	53204.3	36904.3	75	38912.1	55309.1	9604.72	12	39.8282	56.6982	9.81576
hsa-miR-382-5p	749.5	27.8484	57	95	-38	606.33	30.5541	60	92	-32	-6	75	662	748	517	385	805	521	1098	986	518	532	558	805	677.917	749.5	606.33		hsa-miR-382-5p	10306.6	13119.6	3792.27	4956.2	10186.9	4445.65	87224.4	129183	23978.7	52479.7	24479	25558.2	75	32475.8	45498.4	6974.28	12	47.9053	60.705	11.5024
hsa-miR-125a-3p	10.17	33.2617	190	226	-36	10.33	35.4557	185	218	-33	-3	50	6	5	10	7	22	12	11	6	9	10	13	12	10.25	10.17	10.33		hsa-miR-125a-3p	760.75	330.714	111.341	47.014	716.307	171.039	3152.86	2719.36	3168.24	109.097	1467.61	340.497	25	1091.24	1067.65	233.33	12	106.462	104.981	22.5876
hsa-miR-148b-5p	10	33.5967	193	228	-35	9.5	36.1874	186	225	-39	4	50	5	11	5	9	13	14	11	13	8	7	10	11	9.75	10	9.5		hsa-miR-148b-5p	44.6714	412.84	48.4642	171.852	783.85	63.9192	1900.87	4637.25	1175.83	109.097	451.711	719.824	25	876.681	846.419	140.51	12	89.916	84.6419	14.7905
hsa-miR-106b-3p	150.33	29.5751	108	143	-35	181	31.8291	97	121	-24	-11	75	189	171	180	176	204	166	164	165	141	122	157	153	165.667	150.33	181		hsa-miR-106b-3p	1261.81	10509.7	3101.71	1764.47	9117.57	865.973	16640.9	60685	4238.87	10152	21016.8	7390.72	50	12228.8	13747	2881.95	12	73.8157	91.4454	15.9224
hsa-miR-17-5p	44.5	30.7684	152	186	-34	71	33.3974	129	168	-39	5	75	28	39	107	61	113	78	51	51	38	22	52	53	57.75	44.5	71		hsa-miR-17-5p	1153.08	3614.15	548.31	520.957	1462.72	483.77	7763.25	18293.6	5830.74	961.72	8075.05	7339.67	25	4670.59	6011.58	971.808	12	80.8759	135.092	13.6874
hsa-miR-30d-5p	2977.67	26.4167	26	58	-32	3324.83	29.0441	24	54	-30	-2	75	2641	2768	3060	2711	4383	4386	3511	3156	2742	2425	3292	2740	3151.25	2977.67	3324.83		hsa-miR-30d-5p	14475	37366	15274.6	13634.9	38019	14344.2	196265	329302	66426.2	121405	99973.3	65604.1	100	84340.9	122738	19863.4	12	26.7643	41.2196	5.97427
hsa-let-7e-5p	1968	26.7567	30	62	-32	2097.67	29.8674	29	74	-45	13	75	1508	1858	2405	1609	2717	2489	1521	2280	2010	2547	2059	1391	2032.83	1968	2097.67		hsa-let-7e-5p	9097.66	8655.73	7637.3	9121.27	21386.8	17058.2	137822	169280	48626.8	117270	61115.7	102233	75	59108.7	96968.5	11225.8	12	29.077	49.2726	5.35155
hsa-let-7i-3p	25.33	31.4751	172	201	-29	21	33.7507	172	183	-11	-18	50	23	24	24	20	18	17	33	33	27	26	22	11	23.1667	25.33	21		hsa-let-7i-3p	1630.7	1295.63	171.118	1525.45	654.584	536.777	4981.78	3442.05	6424.93	4869.21	2537.61	1834.92	25	2492.06	3683.41	760.723	12	107.571	145.417	36.2249
hsa-miR-218-5p	189.5	29.2617	99	128	-29	153.17	32.6057	101	148	-47	18	75	85	169	182	127	208	148	212	275	103	85	243	219	171.333	189.5	153.17		hsa-miR-218-5p	1459.52	2796.57	1639.28	2098.32	2343.48	688.913	25048.6	36587.2	12326.4	18426.2	10803.8	11048	50	10438.9	17082.5	1682.31	12	60.9272	90.1449	10.9833
hsa-miR-377-3p	42.5	30.7201	154	182	-28	23.17	33.2841	163	162	1	-29	75	16	17	19	13	44	30	60	50	40	20	45	40	32.8333	42.5	23.17		hsa-miR-377-3p	1925.85	1067.07	831.082	606.776	1282.23	1015.64	8205.89	8358.64	2609.33	10656.7	3256.83	9290.24	25	4092.19	6216.25	1051.2	12	124.635	146.265	45.3692
hsa-miR-152-3p	5848.5	25.8601	19	46	-27	4978	29.1024	20	56	-36	9	75	3737	5666	3963	3978	7001	5523	7005	7020	4418	3487	5852	7309	5413.25	5848.5	4978		hsa-miR-152-3p	17213.8	21912.1	10578.5	21395.5	21535.6	26216.3	312272	284694	85846	214330	98596.9	214631	100	110768	180524	19076.8	12	20.4625	30.8667	3.83221
hsa-miR-503-5p	140.83	29.4684	111	138	-27	309.33	32.0407	80	131	-51	24	75	255	253	397	220	452	279	140	120	136	110	174	165	225.083	140.83	309.33		hsa-miR-503-5p	4580.47	2401.03	935.016	2846.59	3157.21	2571.11	24195.4	6603.67	26239.7	24997.1	5870.45	17097.5	50	10124.6	14802.2	2488.79	12	44.9816	105.107	8.04574
hsa-miR-127-3p	3549.17	25.9801	24	48	-24	1888.67	29.0374	32	53	-21	-3	75	3252	1554	1440	1189	2707	1190	5084	5160	2258	2328	3509	2956	2718.92	3549.17	1888.67		hsa-miR-127-3p	16512.6	36597.1	13862	14512.6	35228	14747.5	293387	434517	85253.1	155815	88860.5	139654	100	110746	166116	19955.9	12	40.7315	46.8041	10.5661
hsa-miR-196b-5p	64.83	30.1351	139	163	-24	59.83	33.0557	134	160	-26	2	75	27	31	55	49	110	87	28	41	39	45	117	119	62.3333	64.83	59.83		hsa-miR-196b-5p	347.599	1540.77	571.594	1049.16	3702.88	2933.03	9557.68	7378.2	6605.55	9341.72	8836.47	17097.5	50	5746.85	9324.61	1231.52	12	92.1954	143.832	20.5837
hsa-miR-181a-5p	4493.5	25.8251	21	44	-23	5020	28.2091	19	35	-16	-7	75	3389	3969	5611	6182	5551	5418	2777	2799	6299	4325	5835	4926	4756.75	4493.5	5020		hsa-miR-181a-5p	27770.8	68292.5	30338.2	30680.2	47132.5	23791.8	264415	488857	86443.1	178984	154715	129402	100	127569	184957	35433.5	12	26.8184	41.1609	7.05847
hsa-miR-374a-5p	133.17	29.4434	113	136	-23	146.67	32.0774	104	132	-28	5	75	54	128	155	139	225	179	124	144	113	50	165	203	139.917	133.17	146.67		hsa-miR-374a-5p	1324.54	5402.61	1935.98	1865.08	4527.3	1743.99	17227.7	42027.7	10805.4	13303.1	12848	8728.39	50	10145	15061	2426.28	12	72.5073	113.096	16.5424
hsa-miR-1296-5p	37.17	30.6801	159	181	-22	26.17	33.9307	160	186	-26	4	75	20	17	27	17	42	34	30	40	33	26	52	42	31.6667	37.17	26.17		hsa-miR-1296-5p	1297.28	1277.79	477.331	189.364	726.306	842.293	6349.57	8243.57	5871.3	12412.2	2682.3	6660.89	25	3919.19	6391.01	671.493	12	123.764	171.94	25.6589
hsa-miR-329-3p	97.5	29.7501	127	148	-21	49.83	33.0457	140	159	-19	-2	75	49	45	43	27	73	62	136	144	57	76	97	75	73.6667	97.5	49.83		hsa-miR-329-3p	648.642	2537.94	548.31	1646.31	2026.02	1207.81	28181.2	42614.4	7380.3	15175.7	1977.22	12258.5	50	9683.53	12176.6	1240.09	12	131.451	124.889	24.8864
hsa-miR-22-3p	13062.3	25.3784	13	34	-21	8537.67	28.5107	14	42	-28	7	75	7675	7136	7906	6354	12109	10046	13687	12513	13289	12563	15006	11316	10800	13062.3	8537.67		hsa-miR-22-3p	27011.4	31421	18291	36233.1	29418.5	34116.4	420703	348079	126560	425699	105674	307771	100	159248	252081	28749.1	12	14.7452	19.2983	3.36732
hsa-miR-128-3p	212.67	28.5384	93	114	-21	173.17	31.7557	99	120	-21	0	75	153	165	150	124	241	206	221	245	156	211	276	167	192.917	212.67	173.17		hsa-miR-128-3p	2704.75	6933.85	3562.93	2906.4	5421.34	738.359	59576	62391.1	16264.8	19342.3	24993.3	17216.4	50	18504.3	28202.4	3032.37	12	95.9186	132.611	17.5109
hsa-miR-671-5p	9.17	32.4134	197	217	-20	7.83	34.7941	191	207	-16	-4	50	6	7	6	4	13	11	11	6	7	7	14	10	8.5	9.17	7.83		hsa-miR-671-5p	821.023	1519.56	555.964	91.4569	231.43	172.228	1018.65	6334.67	4543.11	3690.17	86.7778	5372.95	25	2036.5	1922.18	369.09	12	239.588	209.616	47.1379
hsa-miR-99a-5p	757.83	27.2617	56	76	-20	1662	29.8341	36	72	-36	16	75	830	1814	990	1865	2294	2179	735	924	403	381	1018	1086	1209.92	757.83	1662		hsa-miR-99a-5p	10306.6	22218	10726.2	6144.24	18489.7	8238.57	147714	164651	33213.1	42039.9	63270.9	47363.9	75	47864.7	68329.8	11487.9	12	39.5603	90.1651	6.9121
hsa-miR-30e-3p	127	29.4167	117	134	-17	110.33	32.2707	115	137	-22	5	75	98	126	97	103	129	109	116	126	95	127	153	145	118.667	127	110.33		hsa-miR-30e-3p	739.948	4902.97	1697.09	1514.91	4052.04	2415.62	15526.5	30132.9	5478.12	26606.2	11579.3	16515.1	50	10096.7	15342.3	2122.03	12	85.0847	120.806	19.2335
hsa-let-7b-5p	14873.3	24.6934	9	25	-16	13033.3	27.6007	11	25	-14	-2	75	14290	10111	12242	10895	14691	15971	12295	14762	12212	18582	16852	14537	13953.3	14873.3	13033.3		hsa-let-7b-5p	45427.5	49993.1	32741.8	54163	78175.8	78924.1	543697	485480	220354	472342	275035	586389	100	243560	405271	54020.8	12	17.4553	27.2482	4.14482
hsa-miR-100-5p	88948	23.9817	2	18	-16	103860	26.8541	2	16	-14	-2	75	118983	159967	103610	116139	76986	47477	126122	115932	80573	75171	64676	71214	96404.2	88948	103860		hsa-miR-100-5p	116606	109414	54306.9	141950	77099.5	73130.1	1.13357e+06	1.17079e+06	375763	1.13124e+06	262009	578316	100	435350	663726	90638	12	4.51588	7.46195	0.872691
hsa-miR-411-5p	404.33	27.4734	69	84	-15	355	29.4224	76	62	14	-29	75	182	302	273	205	627	541	403	468	241	190	503	621	379.667	404.33	355		hsa-miR-411-5p	42385.4	36597.1	8833.98	6723.61	23241.8	5947.96	95449.1	294734	42332.1	62843.4	51037	11048	75	56764.4	59004.1	15281.8	12	149.511	145.931	43.0474
hsa-miR-30d-3p	4.67	32.9917	209	224	-15	5.5	36.5157	200	226	-26	11	50	4	4	7	5	7	6	7	4	6	2	5	4	5.08333	4.67	5.5		hsa-miR-30d-3p	44.6714	317.242	206.335	101.478	25.7131	257.455	202.594	2719.36	563.966	2485.76	1378.85	4274.38	25	1048.15	1287.39	111.913	12	206.194	275.671	20.3477
hsa-let-7d-5p	719.67	27.1717	58	72	-14	742.83	29.5574	52	67	-15	1	75	800	686	668	562	716	1025	679	795	571	868	756	649	731.25	719.67	742.83		hsa-let-7d-5p	13789.5	28713.5	11181.7	7357.6	30667.7	7272.21	113509	228060	25878.5	64163.8	76292.6	45120.6	75	54333.9	72728.2	13916.7	12	74.3027	101.058	18.7347
hsa-miR-491-5p	5.33	32.4501	205	218	-13	3.17	34.4874	211	201	10	-23	50	1	2	3	2	7	4	6	10	3	2	3	8	4.25	5.33	3.17		hsa-miR-491-5p	44.6714	1427.66	424.272	496.283	1336.68	504.314	2123.82	3394.66	1595.14	3467	1508.87	719.824	25	1420.27	1873.9	456.518	12	334.18	351.576	144.012
hsa-miR-30e-5p	819.33	26.8867	53	65	-12	495.5	29.4691	64	63	1	-13	75	413	397	554	397	668	544	891	818	981	507	1012	707	657.417	819.33	495.5		hsa-miR-30e-5p	11515.4	37625.9	12151.5	12374	32641.8	4932.76	112725	318085	45370.4	104959	71183.5	39828.1	75	66949.4	88612.8	14795.1	12	101.837	108.153	29.8589
hsa-miR-369-5p	22.17	30.7867	176	188	-12	21.17	34.8124	170	208	-38	26	75	11	21	19	10	35	31	24	28	14	13	24	30	21.6667	22.17	21.17		hsa-miR-369-5p	89.3428	1686.06	142.899	636.943	668.338	255.677	24028.3	17068.6	4418.88	928.96	5364.6	4842.38	25	5010.91	5935.81	364.438	12	231.273	267.74	17.2148
hsa-miR-379-3p	32.33	30.5367	165	176	-11	21.5	33.5057	169	175	-6	-5	75	13	22	19	11	39	25	38	39	15	14	39	49	26.9167	32.33	21.5		hsa-miR-379-3p	545.441	2061.45	878.469	403.107	2600.25	518.492	10604.9	18420.9	2609.33	7128.94	7227.37	4709.96	25	4809.05	7058.9	901.528	12	178.664	218.339	41.9315
hsa-miR-423-3p	1358.67	26.1417	40	51	-11	1171.83	28.8207	45	49	-4	-7	75	1349	1074	1053	740	1513	1302	1262	1333	1045	1919	1535	1058	1265.25	1358.67	1171.83		hsa-miR-423-3p	24855.5	51043.5	19468.4	15128.9	37236.6	11176.5	248424	411078	107164	140428	95238.3	73298.7	100	102878	148513	23190.2	12	81.3107	109.308	19.7897
hsa-miR-214-3p	314.17	27.5834	78	89	-11	531.33	29.8474	62	73	-11	0	75	442	752	393	419	584	598	441	485	255	258	214	232	422.75	314.17	531.33		hsa-miR-214-3p	16627.5	14966.4	6333.76	13825.3	8992.05	11099.3	107386	95887.4	43824.9	70702.5	21310.2	39279.8	75	37519.6	54672.5	11382.5	12	88.7512	174.022	21.4226
hsa-miR-339-3p	25.33	30.7217	172	183	-11	21.83	35.3907	168	217	-49	38	75	19	23	18	15	33	23	30	26	20	19	31	26	23.5833	25.33	21.83		hsa-miR-339-3p	44.6714	600.259	118.509	489.451	269.555	504.314	8205.89	7962.76	12412.1	6651.54	1251.34	8489.71	25	3916.68	6209.36	244.083	12	166.078	245.138	11.1811
hsa-miR-199a-3p	13060	24.6601	14	24	-10	16875.8	27.0324	8	20	-12	2	75	13859	18824	16271	15006	17268	20027	14694	18258	11075	10463	11213	12657	14967.9	13060	16875.8		hsa-miR-199a-3p	76399.7	100682	39480.3	104636	86741.5	95829.2	737582	740969	208468	531413	199947	420428	100	278548	414734	80100.7	12	18.6097	31.7561	4.74648
hsa-miR-374b-5p	147.67	28.8784	109	118	-9	144.5	31.5441	106	113	-7	-2	75	63	135	137	131	200	201	122	199	115	71	186	193	146.083	147.67	144.5		hsa-miR-374b-5p	2274.41	6605.45	2814.86	2443.98	8566.17	2117.55	31705.5	65040.6	10730.8	18172.5	18044.3	16862.1	50	15448.2	22281	3511.39	12	105.749	150.884	24.3003
hsa-miR-431-5p	11.67	31.3851	188	197	-9	10.83	34.1324	184	193	-9	0	50	6	11	8	5	22	13	16	22	5	7	8	12	11.25	11.67	10.83		hsa-miR-431-5p	962.925	797.555	268.513	334.305	1034.3	555.706	6349.57	9735.59	2609.33	4122.98	2996.9	1822.24	25	2632.49	3920.52	583.88	12	233.999	335.948	53.9132
hsa-let-7g-5p	5352.17	24.9467	20	29	-9	5599.33	27.6091	18	26	-8	-1	75	5666	5530	4920	4961	5671	6848	5222	6144	4475	5774	5707	4791	5475.75	5352.17	5599.33		hsa-let-7g-5p	38465.6	138492	42904.7	38565.4	94265	28887.9	420703	1.01219e+06	181482	343386	256617	226869	100	235236	340012	53707.2	12	42.9596	63.528	9.59172
hsa-miR-143-3p	37781.5	23.6317	5	13	-8	45723.7	26.0874	4	11	-7	-1	75	46220	28324	38362	37360	66852	57224	34492	32621	26879	37124	50326	45247	41752.6	37781.5	45723.7		hsa-miR-143-3p	124975	155811	135586	166483	177128	172732	1.5485e+06	1.63295e+06	307337	589639	691445	1.15663e+06	100	571602	845959	154209	12	13.6902	22.3908	3.37263
hsa-miR-210-3p	577.83	27.1684	64	71	-7	1401.17	29.4007	40	60	-20	13	75	776	1044	1716	1386	2092	1393	432	585	719	446	627	658	989.5	577.83	1401.17		hsa-miR-210-3p	14677.1	12072.5	13958.4	20382.2	18489.7	14953.3	105907	113242	46645.9	125687	40884.2	52190.5	75	48257.5	72894.8	15513.4	12	48.7696	126.153	11.0718
hsa-miR-660-5p	80	29.4984	134	140	-6	51.83	32.7707	139	154	-15	9	75	46	44	54	45	59	63	73	87	95	68	87	70	65.9167	80	51.83		hsa-miR-660-5p	1279.42	3395.58	1286.15	1221.99	978.504	1708.1	42714.7	22522.1	20024.3	26606.2	5631.31	3217	50	10882.1	14497.6	1500.5	12	165.089	181.22	28.9504
hsa-let-7c-5p	388.83	27.2334	70	75	-5	554.83	29.9241	61	76	-15	10	75	521	530	428	507	612	731	302	455	250	476	436	414	471.833	388.83	554.83		hsa-let-7c-5p	10024.8	20586.9	8712.36	7460.31	13535.3	8708.32	98132.6	119699	42332.1	61124.9	57022.9	66060.5	75	42783.3	69683.4	10793.1	12	90.6747	179.213	19.4531
hsa-miR-496	7.17	31.6551	201	205	-4	3.5	35.4907	207	219	-12	8	50	2	2	4	3	7	3	8	10	5	6	7	7	5.33333	7.17	3.5		hsa-miR-496	44.6714	1009.51	504.548	62.0354	546.635	180.791	2406.04	7226.36	2682.69	4543.14	3490.59	1597.39	25	2024.53	3251.36	227.738	12	379.6	453.467	65.0679
hsa-let-7a-5p	30357.7	23.0067	6	8	-2	29113.8	25.6641	5	7	-2	0	75	31541	27489	26653	23717	29440	35843	24719	33736	23157	38267	33741	28526	29735.8	30357.7	29113.8		hsa-let-7a-5p	162635	290754	127386	189918	319274	214138	1.8543e+06	2.61622e+06	636351	1.27271e+06	863152	1.4539e+06	100	833395	1.30465e+06	206793	12	28.0267	42.9759	7.10291
hsa-miR-101-3p	1562.67	25.6567	36	38	-2	1813.17	28.2641	34	37	-3	1	75	1189	2461	1141	1731	2147	2210	1460	2050	1039	997	1597	2233	1687.92	1562.67	1813.17		hsa-miR-101-3p	35151	96580.2	25335.1	24407.2	62624.3	11978.7	400778	691348	99987.8	189190	178957	85967.2	100	158525	207856	34108.1	12	93.9178	133.014	18.8113
hsa-let-7f-1-3p	3.5	32.2834	214	215	-1	3.5	34.4774	207	200	7	-8	50	2	3	4	2	5	5	4	4	3	2	5	3	3.5	3.5	3.5		hsa-let-7f-1-3p	263.431	684.753	604.185	348.501	573.812	432.986	3908.62	3301.84	916.165	1697.83	1044.98	4128.78	25	1492.16	2103.43	459.693	12	426.33	600.98	131.341
hsa-miR-543	204.17	27.8617	95	96	-1	103.33	31.3057	119	107	12	-13	75	120	101	81	49	151	118	166	304	130	249	202	174	153.75	204.17	103.33		hsa-miR-543	4486.2	5254.87	4416.99	3315.52	4527.3	3231.93	103011	86418.5	18172.4	57827.7	22215.1	40384.1	75	29438.5	45080.9	4142.33	12	191.47	220.801	40.0884
hsa-miR-140-3p	631.67	26.8101	63	64	-1	729.5	29.3041	53	58	-5	4	75	671	993	751	677	744	541	781	983	436	426	532	632	680.583	631.67	729.5		hsa-miR-140-3p	18321.9	34863.8	15487.8	13262.1	24397.3	6508.81	233400	241063	34623.5	87044.9	82909.8	47363.9	75	69937.3	93444.9	16587.7	12	102.761	147.933	22.7385
hsa-miR-137	124	28.9167	118	119	-1	56.17	32.7657	137	153	-16	15	75	19	36	79	50	90	63	93	128	148	93	132	150	90.0833	124	56.17		hsa-miR-137	943.108	1388.62	689.233	2127.61	2040.11	2973.98	25575	22836.5	11500.9	47957.6	10221	31684.7	50	13328.2	21697.3	1505.71	12	147.954	174.978	26.8063
hsa-miR-29a-3p	8004.5	23.9567	16	17	-1	4005.67	27.7624	21	27	-6	5	75	1919	2360	3980	2342	7279	6154	7834	8136	7541	5378	9748	9390	6005.08	8004.5	4005.67		hsa-miR-29a-3p	38465.6	32983.1	28901.3	56855.8	70456	86366.1	883239	875079	365488	1.07766e+06	402675	773745	100	390993	675328	48293.1	12	65.1103	84.3685	12.0562
hsa-miR-27b-3p	14251	23.5001	11	11	0	15430.3	26.4024	9	12	-3	3	75	4670	8635	12437	13060	29444	24336	8253	8642	8880	8450	23579	27702	14840.7	14251	15430.3		hsa-miR-27b-3p	94713.3	136585	72658.7	132444	169913	171539	1.31119e+06	1.30811e+06	495822	1.12343e+06	610340	1.08668e+06	100	559452	926755	123961	12	37.6972	65.0309	8.0336
hsa-miR-125a-5p	1624.17	25.4767	35	35	0	1937.83	28.4324	31	40	-9	9	75	1309	1680	1685	1770	2333	2850	1162	1600	1144	2088	1897	1854	1781	1624.17	1937.83		hsa-miR-125a-5p	22092.7	29932.8	17914.6	30893.6	45527	46928.5	341717	320298	201366	269415	139437	205888	100	139284	235477	30352.5	12	78.2056	144.983	15.6631
hsa-miR-21-5p	115191	21.2151	1	1	0	204536	23.7057	1	1	0	0	75	161383	251802	230730	220307	185972	177019	121460	114664	112141	79326	114416	149140	159863	115191	204536		hsa-miR-21-5p	920003	1.24649e+06	465637	1.11996e+06	689138	653659	6.50196e+06	7.39979e+06	2.84395e+06	6.18127e+06	2.56274e+06	3.91749e+06	100	2.87518e+06	4.51667e+06	803661	12	17.9852	39.2102	3.9292
hsa-miR-221-3p	23058	22.3151	7	6	1	12468.7	25.6141	12	6	6	-5	75	6544	7050	11760	8186	22680	18592	20320	22751	18785	20370	28518	27604	17763.3	23058	12468.7		hsa-miR-221-3p	171908	146388	134649	242062	344569	340708	2.07179e+06	2.0104e+06	1.31758e+06	4.13505e+06	1.10014e+06	3.50625e+06	100	1.29346e+06	2.1071e+06	214086	12	72.8162	91.3826	17.1699
hsa-miR-337-5p	8.33	31.3684	198	196	2	4.83	35.0057	203	210	-7	9	50	4	3	4	2	10	6	13	8	7	4	10	8	6.58333	8.33	4.83		hsa-miR-337-5p	270.837	407.157	197.93	233.135	265.844	775.067	6482.99	5669.69	3257.31	7329.37	1674.2	2649.49	25	2434.42	3966.16	318.738	12	369.785	476.13	65.9913
hsa-miR-485-3p	128.17	28.4951	116	113	3	74.17	32.4657	127	145	-18	21	75	88	71	59	33	116	78	140	171	76	131	148	103	101.167	128.17	74.17		hsa-miR-485-3p	1235.84	2019.02	1457.06	907.038	4919.97	2500.81	74370.6	29924.8	17432.2	37888.5	15068.6	27203.4	50	17910.6	29061.6	1853.75	12	177.041	226.743	24.9932
hsa-miR-193a-3p	9.5	30.9367	194	190	4	5.83	34.3891	198	199	-1	5	75	3	3	4	2	15	8	14	10	8	4	13	8	7.66667	9.5	5.83		hsa-miR-193a-3p	340.445	467.7	183.4	535.603	869.736	1001.66	7656.37	8593.64	3820.28	9604.35	2119.13	4581.17	25	3314.46	5349.65	488.708	12	432.32	563.121	83.8264
hsa-miR-708-5p	81.17	29.2634	133	129	4	30.33	33.5424	153	177	-24	28	75	19	34	24	17	65	23	79	68	68	35	117	120	55.75	81.17	30.33		hsa-miR-708-5p	1270.59	1584.09	522.341	397.557	1412.89	780.458	18464.2	25692.4	11264.3	16264.9	10080.3	28162.7	50	9658.06	17062.3	878.883	12	173.239	210.205	28.9774
hsa-miR-450a-5p	106.5	28.7434	122	117	5	139.17	30.3774	109	88	21	-16	75	115	164	155	111	150	140	97	88	134	84	135	101	122.833	106.5	139.17		hsa-miR-450a-5p	9160.94	13582.3	6741.47	6230.01	8217.22	5588.24	4046.46	52102.1	22064.9	44437	31855.5	32575.5	75	19716.8	24466.6	7882.99	12	160.517	229.734	56.6429
hsa-miR-342-3p	68.5	29.3434	136	131	5	113.83	31.6024	114	115	-1	6	75	54	75	85	83	201	185	75	97	47	42	77	73	91.1667	68.5	113.83		hsa-miR-342-3p	1003.82	4869.1	2018.19	5311.93	4342.87	6463.85	23533.8	26051	13867.9	13677.1	7639.46	19914.1	50	10724.4	16142	3372.33	12	117.635	235.649	29.626
hsa-miR-335-5p	5.33	31.4667	205	200	5	9.33	34.2557	187	196	-9	14	50	1	8	3	6	15	23	3	11	1	0	7	10	7.33333	5.33	9.33		hsa-miR-335-5p	849.977	831.424	245.375	476.067	773.059	371.747	9296.32	7481.2	1595.14	2976.65	3514.87	2227.95	25	2553.31	3704.92	536.052	12	348.179	695.108	57.4546
hsa-miR-103a-3p	2864.83	24.2867	28	20	8	2597.67	26.8957	27	18	9	-1	75	1377	2369	2599	2188	3541	3512	2855	3051	2677	2274	2689	3643	2731.25	2864.83	2597.67		hsa-miR-103a-3p	76399.7	215816	72658.7	54539.7	164125	43483.4	812746	1.50262e+06	269414	475628	437600	351094	100	373011	537248	88061.8	12	136.571	187.532	33.9003
hsa-miR-1468-5p	2.83	32.0034	218	210	8	2.5	35.1691	215	214	1	7	50	0	1	2	3	6	3	1	0	1	4	5	6	2.66667	2.83	2.5		hsa-miR-1468-5p	44.6714	1639.95	268.513	164.851	900.407	182.048	1430.64	14352.9	1757.69	2005.12	1119.98	3424.08	25	2274.24	2553.97	284.607	12	852.839	902.464	113.843
hsa-miR-27a-3p	1769.5	24.4434	33	23	10	1728.83	27.5224	35	24	11	-1	75	881	1596	1752	1603	2339	2202	1738	1750	1603	1300	2020	2206	1749.17	1769.5	1728.83		hsa-miR-27a-3p	54022.7	59041.4	31846.5	63085.4	68056	78924.1	747878	794151	318176	649726	247875	411776	100	293713	481951	57033.7	12	167.916	272.366	32.9898
hsa-miR-125b-5p	14083	21.7734	12	2	10	15272	24.8924	10	4	6	4	75	8644	16788	15265	16595	17755	16585	10780	12783	11513	13142	16699	19581	14677.5	14083	15272		hsa-miR-125b-5p	318576	350594	199890	454846	409764	465421	4.00243e+06	3.96545e+06	1.825e+06	4.16381e+06	1.70254e+06	4.05564e+06	100	1.82616e+06	3.06728e+06	353054	12	124.419	217.8	23.1177
hsa-miR-665	3.33	31.5384	216	204	12	1.67	34.3807	220	198	22	-10	50	1	1	1	2	4	1	5	3	5	2	3	2	2.5	3.33	1.67		hsa-miR-665	1333.76	306.436	591.751	496.283	246.328	477.11	1967.9	3301.84	2855.37	7965.08	3017.74	4304.11	25	2238.64	3525.29	491.561	12	895.457	1058.65	294.348
hsa-miR-28-5p	105	28.4884	124	112	12	140.33	31.1024	107	102	5	7	75	61	120	155	110	197	199	102	98	89	81	111	149	122.667	105	140.33		hsa-miR-28-5p	4580.47	8188.82	3871.96	3202.58	9570.87	2643.4	43915.6	68749.1	14863.3	24145.6	20021.4	28555.9	75	19359.1	29196.9	4769.19	12	157.819	278.066	33.9855
hsa-miR-487b-3p	78.5	29.0334	135	122	13	38	31.8674	147	123	24	-11	75	43	38	28	21	55	43	113	112	56	55	63	72	58.25	78.5	38		hsa-miR-487b-3p	2819.61	8360.89	1720.78	1669.29	5093.47	1416.56	44221	63262.1	6206.07	19342.3	12154.9	15732.9	50	15166.7	20011.3	2806.45	12	260.372	254.921	73.8538
hsa-miR-505-3p	37	29.7401	161	147	14	27	31.9107	159	124	35	-21	75	36	23	23	21	34	25	37	50	21	38	45	31	32	37	27		hsa-miR-505-3p	1664.97	10437.2	1909.33	2547.77	6628.35	728.194	28574.6	102060	1016.55	17432.3	15385.2	4274.38	50	16054.9	12261.3	2723.47	12	501.715	331.387	100.869
hsa-miR-7-1-3p	2.67	31.6617	220	206	14	1.83	34.0491	219	191	28	-14	50	1	2	2	1	3	2	4	3	2	1	3	3	2.25	2.67	1.83		hsa-miR-7-1-3p	44.6714	2271.52	813.979	598.422	1645.64	688.913	7981.5	7638.39	5365.38	5075.99	587.83	1177.49	25	2824.14	3236.52	618.585	12	1255.17	1212.18	338.025
hsa-miR-328-3p	60	29.2584	141	127	14	44.33	32.2907	141	138	3	11	75	46	46	31	35	52	56	57	71	43	79	67	43	52.1667	60	44.33		hsa-miR-328-3p	1796.88	4543.03	2554.54	1247.67	1751.57	1843.43	32148.1	32974.3	16040.9	26239.9	7078.63	7976.28	50	11349.6	17121.6	2092.81	12	217.564	285.36	47.2099
hsa-miR-31-5p	1027	25.2434	45	31	14	654.67	28.9641	56	51	5	9	75	561	597	865	579	734	592	1164	1067	1229	934	994	774	840.833	1027	654.67		hsa-miR-31-5p	23514.8	14760.4	12933.7	29227.1	28220.1	23141.2	454035	271210	516878	305216	108644	213149	100	166744	276808	20996	12	198.308	269.531	32.0711
hsa-miR-222-3p	1859.67	23.9101	31	15	16	1274.83	26.8741	42	17	25	-9	75	680	706	1256	925	2237	1845	1811	2244	1241	1982	2021	1859	1567.25	1859.67	1274.83		hsa-miR-222-3p	69334.2	72688.5	39480.3	121873	137059	153532	980015	950979	333994	977999	399893	946012	100	431905	697497	89390.1	12	275.581	375.065	70.1193
hsa-miR-320a	1137.83	24.8484	43	27	16	1452.17	27.8757	37	29	8	8	75	957	1200	1451	1042	2000	2063	1187	1237	1208	1046	1084	1065	1295	1137.83	1452.17		hsa-miR-320a	59116.8	58228.6	29713.8	43088.6	48794.6	36819.4	753080	663186	177747	456252	223398	257016	100	233870	363987	44645.5	12	180.595	319.896	30.744
hsa-miR-30c-5p	899.67	25.2901	49	32	17	745.33	27.9674	51	31	20	-3	75	375	623	713	661	912	1188	733	1043	719	835	1000	1068	822.5	899.67	745.33		hsa-miR-30c-5p	27963.9	99986.1	35091.8	25267.9	86142.3	25323.3	389819	881165	135644	215821	231276	159312	100	192734	267992	41896.1	12	234.327	297.878	56.2115
hsa-miR-23a-3p	4076.67	21.8967	22	5	17	3192.83	25.0374	25	5	20	-3	75	1858	2955	2814	2579	4686	4265	4692	4326	2841	3201	4228	5172	3634.75	4076.67	3192.83		hsa-miR-23a-3p	269753	341007	199890	359347	384983	416564	4.44097e+06	4.27963e+06	1.69102e+06	3.67541e+06	1.49245e+06	2.82829e+06	100	1.69828e+06	2.81602e+06	319294	12	467.233	690.766	100.004
hsa-miR-423-5p	680.83	25.7867	59	42	17	617.5	28.7874	59	48	11	6	75	742	609	474	417	771	692	917	746	502	758	647	515	649.167	680.83	617.5		hsa-miR-423-5p	35395.5	42922.3	18418.2	22615.4	25433.4	11099.3	536212	320298	69728.6	231311	157966	107316	100	131560	189946	23731.7	12	202.659	278.991	38.4319
hsa-miR-24-3p	2989.83	22.6017	25	7	18	2391.67	25.7924	28	8	20	-2	75	1063	1903	2012	1702	3942	3728	3151	2818	2511	2014	3693	3752	2690.75	2989.83	2391.67		hsa-miR-24-3p	129382	244494	120514	183449	266622	245979	2.64062e+06	2.63442e+06	1.10795e+06	2.02498e+06	918713	1.85309e+06	100	1.03085e+06	1.72747e+06	189197	12	383.109	577.782	79.1066
hsa-miR-34a-5p	363.17	26.1884	72	53	19	194.5	29.5107	96	65	31	-12	75	94	116	201	199	317	240	319	384	422	201	516	337	278.833	363.17	194.5		hsa-miR-34a-5p	9353.43	14557.2	9468.02	19687.9	17371.5	20006.5	211815	123920	112492	239468	77895.6	160421	100	84704.6	143782	14374.5	12	303.782	395.909	73.9051
hsa-miR-145-5p	2199.83	23.3517	29	10	19	2079.83	25.9707	30	10	20	-1	75	2083	1106	1828	1584	3365	2513	1838	2065	2142	1508	3450	2196	2139.83	2199.83	2079.83		hsa-miR-145-5p	185528	159085	126506	151087	192491	201187	1.71817e+06	1.45144e+06	573512	887552	783327	1.18094e+06	100	634235	1.02716e+06	167201	12	296.395	466.927	80.3919
hsa-miR-425-3p	15.17	30.1367	183	164	19	11	33.6707	183	180	3	16	75	10	10	11	9	14	12	20	22	11	12	12	14	13.0833	15.17	11		hsa-miR-425-3p	22.3357	5146.73	1268.45	1205.17	3677.31	418.237	24703.8	16833.6	5671.3	7587.84	10010.7	3644.49	50	6682.49	9314.28	804.098	12	510.764	613.993	73.0998
hsa-miR-136-3p	232	27.1651	90	70	20	165.83	30.0674	100	80	20	0	75	184	130	150	111	261	159	285	257	198	174	270	208	198.917	232	165.83		hsa-miR-136-3p	12256.7	22064.5	5787.99	8569.64	15227.9	4264.55	137822	121370	55088.5	99988.4	44739.3	36904.3	75	47007	73061.7	9772.61	12	236.315	314.921	58.9315
hsa-miR-484	105.17	28.0101	123	103	20	132.33	30.5174	112	91	21	-1	75	114	87	129	99	216	149	97	97	102	115	133	87	118.75	105.17	132.33		hsa-miR-484	4875.31	18172.1	6377.82	3835.02	14012.6	4414.94	60407.7	125650	15710.7	56246.4	34379.4	19639.9	75	30310.2	40674.2	7153.97	12	255.244	386.748	54.0616
hsa-let-7f-2-3p	9.5	30.4351	194	172	22	8.83	33.9357	190	187	3	19	75	8	9	8	9	8	11	11	7	11	6	14	8	9.16667	9.5	8.83		hsa-let-7f-2-3p	399.286	680.023	406.989	784.168	1034.3	1001.66	10172.9	9668.35	7965.03	9671.16	5005.35	4978.51	25	4313.98	7573.94	669.17	12	470.616	797.257	75.7836
hsa-miR-185-5p	385.17	25.9601	71	47	24	247.67	28.7857	88	47	41	-17	75	185	255	221	178	366	281	444	456	330	355	340	386	316.417	385.17	247.67		hsa-miR-185-5p	24344	97928.4	16714.9	14715.2	51220.5	5989.33	279491	627412	86443.1	133777	144354	78016.9	100	130034	168434	23759.7	12	410.958	437.299	95.9328
hsa-miR-29b-3p	164.33	27.4251	105	81	24	60	31.1274	133	104	29	-5	75	30	26	34	22	154	94	169	141	128	64	297	187	112.167	164.33	60		hsa-miR-29b-3p	3544.29	4543.03	2934.39	2478.1	12983.9	6975.97	74887.9	91981.3	26977.4	71194.2	36088.6	108062	75	36887.6	61013	4687.26	12	328.864	371.283	78.1209
hsa-miR-149-5p	34.17	29.4901	163	139	24	20.5	33.9557	173	188	-15	39	75	10	13	17	13	42	28	39	36	25	32	41	32	27.3333	34.17	20.5		hsa-miR-149-5p	22.3357	739.005	608.388	1205.17	3007.68	2269.53	24703.8	4009.07	25699.7	26977.6	16375.5	8548.76	50	9513.88	14581.3	659.957	12	348.069	426.727	32.193
hsa-miR-421	14.5	30.0717	184	159	25	9.33	32.8191	187	155	32	-7	75	5	8	11	6	13	13	19	21	8	10	13	16	11.9167	14.5	9.33		hsa-miR-421	666.878	4038.04	2118.53	554.491	3201.28	921.716	25575	19606.6	3793.89	4802.18	12848	7288.97	50	7117.96	9743.53	1451	12	597.312	671.967	155.519
hsa-miR-92a-3p	1026.83	24.4167	46	21	25	1256.83	27.1907	44	22	22	3	75	1304	913	1397	1115	1447	1365	733	1020	742	1576	1360	730	1141.83	1026.83	1256.83		hsa-miR-92a-3p	73797.2	182741	55833.6	56073	129665	24974.7	959847	1.06991e+06	338657	602029	391663	170747	100	337994	490954	71776.7	12	296.01	478.126	57.1093
hsa-miR-410-3p	68.5	28.3484	136	109	27	37.67	31.5424	148	112	36	-9	75	38	33	31	18	58	48	83	108	43	53	70	54	53.0833	68.5	37.67		hsa-miR-410-3p	3085.48	7030.64	3037.88	2264.57	5730.45	2207.47	84839.3	56230	10081.8	46004	22681.9	22096	75	22107.5	32172.2	3515.53	12	416.467	469.668	93.3245
hsa-miR-22-5p	82.83	28.0984	132	105	27	71.83	30.8441	128	97	31	-4	75	61	74	81	52	103	60	124	88	78	73	74	60	77.3333	82.83	71.83		hsa-miR-22-5p	9418.49	6469.51	2996.05	7206.18	6402.56	4090.83	52587.9	56621.1	25878.5	52117.2	22525.2	34672.4	75	23415.5	38259.4	5704.28	12	302.787	461.903	79.4136
hsa-miR-532-3p	9.5	30.2234	194	167	27	6.5	34.2141	196	194	2	25	75	4	6	8	5	9	7	8	11	13	6	10	9	8	9.5	6.5		hsa-miR-532-3p	44.6714	2271.52	172.308	888.372	2097.47	865.973	25048.6	7077.64	15494.4	9023.51	3563.93	5154.08	50	5975.21	8771.02	551.734	12	746.902	923.265	84.8821
hsa-miR-425-5p	155.67	27.2684	106	77	29	106.5	29.7674	117	71	46	-17	75	75	97	87	59	210	111	241	206	117	60	196	114	131.083	155.67	106.5		hsa-miR-425-5p	7088.57	41173.8	10652.1	6677.16	30881	4731.82	110405	294734	29114.8	51044.7	63711	32127	75	56861.7	68013.2	12031.5	12	433.783	436.907	112.972
hsa-miR-574-3p	253.67	26.2867	85	55	30	284.67	28.9841	82	52	30	0	75	113	177	218	195	546	459	264	170	183	201	343	361	269.167	253.67	284.67		hsa-miR-574-3p	18195.3	21019.5	10007.9	22772.7	28614	31611.9	174449	150463	65059.1	199977	88246.7	194782	100	83766.5	134312	20707	12	311.207	529.475	72.7402
hsa-miR-320d	1.33	31.3534	225	195	30	2	33.7391	218	181	37	-7	50	2	2	2	2	2	2	1	1	1	2	1	2	1.66667	1.33	2		hsa-miR-320d	1333.76	1225.74	1350.1	271.54	472.586	718.168	23862.3	185.986	1674.44	9341.72	3767.14	15842.4	25	5003.82	4007.61	766.865	12	3002.29	3013.24	383.432
hsa-miR-25-3p	675.33	25.2134	60	30	30	1004.5	27.7624	47	27	20	10	75	700	1082	909	892	1310	1134	769	744	471	520	706	842	839.917	675.33	1004.5		hsa-miR-25-3p	36898.6	193160	37610.5	32205.5	126120	11651.1	500304	1.2901e+06	112492	320391	260199	84198.1	100	250444	282625	48293.1	12	298.177	418.499	48.0767
hsa-miR-495-3p	210.67	26.7701	94	63	31	104.83	29.7491	118	70	48	-17	75	96	98	68	43	199	125	473	275	116	134	128	138	157.75	210.67	104.83		hsa-miR-495-3p	13136.4	22528.1	9273.17	7617.06	17492.3	8953.14	214772	226485	34146.8	136588	61115.7	56717.2	75	67402	96072	12185.1	12	427.271	456.031	116.237
hsa-miR-874-3p	4.33	30.6351	211	180	31	3.33	33.3874	209	167	42	-11	75	4	7	4	2	2	1	5	10	4	3	3	1	3.83333	4.33	3.33		hsa-miR-874-3p	1772.14	1388.62	954.663	800.645	1727.46	270.255	17347.5	13207.3	2503.04	14357.1	7177.45	1390.61	25	5241.4	6593.5	978.568	12	1367.32	1522.75	293.864
hsa-miR-539-5p	16.33	29.7534	182	149	33	7	32.7307	194	151	43	-10	75	8	8	3	4	13	6	25	34	8	9	10	12	11.6667	16.33	7		hsa-miR-539-5p	2506.19	4010.15	439.234	1346.52	2885.16	785.887	9624.16	32520.3	5218.66	15602.3	9736.95	12957.5	50	8136.09	12148.8	1542.69	12	697.379	743.957	220.384
hsa-miR-197-3p	97.83	27.6901	125	92	33	85.33	30.8474	122	98	24	9	75	51	75	78	63	150	95	106	84	73	113	112	99	91.5833	97.83	85.33		hsa-miR-197-3p	7338.55	6163.1	3538.32	4167.65	10546.2	4831.24	86621.9	98583.1	41749.3	45686.3	29516.9	35647.2	75	31199.1	50774.9	5691.24	12	340.664	519.012	66.6969
hsa-miR-324-5p	10.17	29.9584	190	156	34	5.33	33.0557	201	160	41	-7	75	5	4	6	5	6	6	14	11	11	6	11	8	7.75	10.17	5.33		hsa-miR-324-5p	481.462	2401.03	860.39	1140.16	2459.99	1250.4	17108.7	23155.3	6886.06	7693.76	6335.55	10308.2	50	6673.41	10539.6	1231.52	12	861.086	1036.34	231.055
hsa-miR-324-3p	3.5	30.5801	214	178	36	2.83	32.6724	213	150	63	-27	75	3	2	3	2	4	3	6	3	3	3	4	2	3.16667	3.5	2.83		hsa-miR-324-3p	1288.32	1963.81	1216.78	1904.27	1668.61	1756.12	9491.66	16833.6	6933.96	10152	948.336	9684.75	50	4914.78	6849.71	1606.3	12	1552.04	1957.06	567.598
hsa-miR-215-5p	18.67	29.5934	181	144	37	1.5	31.9691	222	128	94	-57	75	1	2	0	1	3	2	39	17	11	4	23	18	10.0833	18.67	1.5		hsa-miR-215-5p	2454.61	6163.1	2178.09	2693.04	3702.88	974.27	34455.4	47612.5	4298.04	17798.6	18296.2	2723.98	50	11945.9	13573.7	2615.42	12	1184.72	727.034	1743.61
[truncated: 84 more rows]
